# Supplementary material for: NG-Tax 2.0: A Semantic Framework for High-Throughput Amplicon Analysis
Source: Front Genet. 2020 Jan 23;10:1366. doi: 10.3389/fgene.2019.01366 (PMC6989550; doi:10.3389/fgene.2019.01366)
Supplement: Supplementary file 2 [file DataSheet_2.xlsx]

## Sheet: mock13
1	TACGTAGGTGGCAAGCGTTGTCCGGATTTATTGGGCGTAAAGCGCGCGCAGGCGGTCTTTTAAGTCTGAT_CCTGTTTGCTCCCCACGCTTTCGCGCCTCAGCGTCAGTTACAGACCAGAGAGTCGCCTTCGCTACTGGTG
SILVA_123_SSURef_tax_silva.fasta.gz	Bacteria;Firmicutes;Bacilli;Bacillales;Listeriaceae;Listeria
SILVA_123_SSURef_tax_silva_full_align_trunc.fasta.gz	Bacteria;Firmicutes;Bacilli;Bacillales;Listeriaceae;Listeria
SILVA_128_SSURef_tax_silva.fasta.gz	Bacteria;Firmicutes;Bacilli;Bacillales;Listeriaceae;Listeria
SILVA_128_SSURef_tax_silva_full_align_trunc.fasta.gz	Bacteria;Firmicutes;Bacilli;Bacillales;Listeriaceae;Listeria
SILVA_132_SSURef_tax_silva.fasta.gz	Bacteria;Firmicutes;Bacilli;Bacillales;Listeriaceae;Listeria
SILVA_132_SSURef_tax_silva_full_align_trunc.fasta.gz	Bacteria;Firmicutes;Bacilli;Bacillales;Listeriaceae;Listeria
bac_ssu_r86.1_20180911.fna.gz	Bacteria;Firmicutes;Bacilli;Lactobacillales;Listeriaceae;Listeria
2	TACGAAGGGTGCAAGCGTTAATCGGAATTACTGGGCGTAAAGCGCGCGTAGGTGGTTCAGCAAGTTGGAT_CCTGTTTGCTCCCCACGCTTTCGCACCTCAGTGTCAGTATCAGTCCAGGTGGTCGCCTTCGCTACTGGTG
SILVA_123_SSURef_tax_silva.fasta.gz	Bacteria;Proteobacteria;Gammaproteobacteria;Pseudomonadales;Pseudomonadaceae;Pseudomonas
SILVA_123_SSURef_tax_silva_full_align_trunc.fasta.gz	Bacteria;Proteobacteria;Gammaproteobacteria;Pseudomonadales;Pseudomonadaceae;Pseudomonas
SILVA_128_SSURef_tax_silva.fasta.gz	Bacteria;Proteobacteria;Gammaproteobacteria;Pseudomonadales;Pseudomonadaceae;Pseudomonas
SILVA_128_SSURef_tax_silva_full_align_trunc.fasta.gz	Bacteria;Proteobacteria;Gammaproteobacteria;Pseudomonadales;Pseudomonadaceae;Pseudomonas
SILVA_132_SSURef_tax_silva.fasta.gz	Bacteria;Proteobacteria;Gammaproteobacteria;Pseudomonadales;Pseudomonadaceae;Pseudomonas
SILVA_132_SSURef_tax_silva_full_align_trunc.fasta.gz	Bacteria;Proteobacteria;Gammaproteobacteria;Pseudomonadales;Pseudomonadaceae;Pseudomonas
bac_ssu_r86.1_20180911.fna.gz	Bacteria;Proteobacteria;Gammaproteobacteria;Pseudomonadales;Pseudomonadaceae
3	TACGGAGGGTGCAAGCGTTACCCGGAATCACTGGGCGTAAAGGGCGTGTAGGCGGAAATTTAAGTCTGGT_CCGGTTTGCTCCCCACACTTTCGCGCCTCAGCGTCACCTTCTGTCCAGTAACTTGCCTTCGCCATTGGTG
SILVA_123_SSURef_tax_silva.fasta.gz	Bacteria;Deinococcus-Thermus;Deinococci;Deinococcales;Deinococcaceae;Deinococcus
SILVA_123_SSURef_tax_silva_full_align_trunc.fasta.gz	Bacteria;Deinococcus-Thermus;Deinococci;Deinococcales;Deinococcaceae;Deinococcus
SILVA_128_SSURef_tax_silva.fasta.gz	Bacteria;Deinococcus-Thermus;Deinococci;Deinococcales;Deinococcaceae;Deinococcus
SILVA_128_SSURef_tax_silva_full_align_trunc.fasta.gz	Bacteria;Deinococcus-Thermus;Deinococci;Deinococcales;Deinococcaceae;Deinococcus
SILVA_132_SSURef_tax_silva.fasta.gz	Bacteria;Deinococcus-Thermus;Deinococci;Deinococcales;Deinococcaceae;Deinococcus
SILVA_132_SSURef_tax_silva_full_align_trunc.fasta.gz	Bacteria;Deinococcus-Thermus;Deinococci;Deinococcales;Deinococcaceae;Deinococcus
bac_ssu_r86.1_20180911.fna.gz	Bacteria;Deinococcota;Deinococci;Deinococcales;Deinococcaceae;Deinococcus
4	TACGTAGGTGGCAAGCGNTGTCCGGATTTATTGGGCGTAAAGCGCGCGCAGGCGGTCTTTTAAGTCTGAT_CCTGTTTGCTCCCCACGCTTTCGCGCCTCAGCGTCAGTTACAGACCAGAGAGTCGCCTTCGCCACTGGTG
SILVA_123_SSURef_tax_silva.fasta.gz	Bacteria;Firmicutes;Bacilli;Bacillales;Listeriaceae;Listeria
SILVA_123_SSURef_tax_silva_full_align_trunc.fasta.gz	Bacteria;Firmicutes;Bacilli;Bacillales;Listeriaceae;Listeria
SILVA_128_SSURef_tax_silva.fasta.gz	Bacteria;Firmicutes;Bacilli;Bacillales;Listeriaceae;Listeria
SILVA_128_SSURef_tax_silva_full_align_trunc.fasta.gz	Bacteria;Firmicutes;Bacilli;Bacillales;Listeriaceae;Listeria
SILVA_132_SSURef_tax_silva.fasta.gz	Bacteria;Firmicutes;Bacilli;Bacillales;Listeriaceae;Listeria
SILVA_132_SSURef_tax_silva_full_align_trunc.fasta.gz	Bacteria;Firmicutes;Bacilli;Bacillales;Listeriaceae;Listeria
bac_ssu_r86.1_20180911.fna.gz	Bacteria;Firmicutes;Bacilli;Lactobacillales;Listeriaceae;Listeria
5	TACGTAGGTGGCAAGCGTTATCCGGAATTATTGGGCGTAAAGCGCGCGTAGGCGGTTTTTTAAGTCTGAT_CCTGTTTGATACCCACGCTTTCGCACATCAGCGTCAGTTACAGACCAGAAAGTCGCCTTCGCCACTGGTG
SILVA_123_SSURef_tax_silva.fasta.gz	Bacteria;Firmicutes;Bacilli;Bacillales;Staphylococcaceae;Staphylococcus
SILVA_123_SSURef_tax_silva_full_align_trunc.fasta.gz	Bacteria;Firmicutes;Bacilli;Bacillales;Staphylococcaceae;Staphylococcus
SILVA_128_SSURef_tax_silva.fasta.gz	Bacteria;Firmicutes;Bacilli;Bacillales;Staphylococcaceae;Staphylococcus
SILVA_128_SSURef_tax_silva_full_align_trunc.fasta.gz	Bacteria;Firmicutes;Bacilli;Bacillales;Staphylococcaceae;Staphylococcus
SILVA_132_SSURef_tax_silva.fasta.gz	Bacteria;Firmicutes;Bacilli;Bacillales;Staphylococcaceae;Staphylococcus
SILVA_132_SSURef_tax_silva_full_align_trunc.fasta.gz	Bacteria;Firmicutes;Bacilli;Bacillales;Staphylococcaceae;Staphylococcus
bac_ssu_r86.1_20180911.fna.gz	Bacteria;Firmicutes;Bacilli;Staphylococcales;Staphylococcaceae;Staphylococcus
6	TACGGAGGGTGCAAGCGTTACTCGGAATCACTGGGCGTAAAGAGCGCGTAGGCGGGATAGTCAGTCAGGT_CCTGTTTGCTCCCCACGCTTTCGCGCAATCAGCGTCAGTAATGTTCCAGCAGGTCGCCTTCGCCATGAGT
SILVA_123_SSURef_tax_silva.fasta.gz	Bacteria;Proteobacteria;Epsilonproteobacteria;Campylobacterales;Helicobacteraceae;Helicobacter
SILVA_123_SSURef_tax_silva_full_align_trunc.fasta.gz	Bacteria;Proteobacteria;Epsilonproteobacteria;Campylobacterales;Helicobacteraceae;Helicobacter
SILVA_128_SSURef_tax_silva.fasta.gz	Bacteria;Proteobacteria;Epsilonproteobacteria;Campylobacterales;Helicobacteraceae;Helicobacter
SILVA_128_SSURef_tax_silva_full_align_trunc.fasta.gz	Bacteria;Proteobacteria;Epsilonproteobacteria;Campylobacterales;Helicobacteraceae;Helicobacter
SILVA_132_SSURef_tax_silva.fasta.gz	Bacteria;Epsilonbacteraeota;Campylobacteria;Campylobacterales;Helicobacteraceae;Helicobacter
SILVA_132_SSURef_tax_silva_full_align_trunc.fasta.gz	Bacteria;Epsilonbacteraeota;Campylobacteria;Campylobacterales;Helicobacteraceae;Helicobacter
bac_ssu_r86.1_20180911.fna.gz	Bacteria;Campylobacterota;Campylobacteria;Campylobacterales;Helicobacteraceae;Helicobacter
7	TACGGAGGGTGCAAGCGTTAATCGGAATTACTGGGCGTAAAGCGCACGCAGGCGGTTTGTTAAGTCAGAT_CCTGTTTGCTCCCCACGCTTTCGCACCTGAGCGTCAGTCTTCGTCCAGGGGGCCGCCTTCGCCACCGGTA
SILVA_123_SSURef_tax_silva.fasta.gz	Bacteria;Proteobacteria;Gammaproteobacteria;Enterobacteriales;Enterobacteriaceae
SILVA_123_SSURef_tax_silva_full_align_trunc.fasta.gz	Bacteria;Proteobacteria;Gammaproteobacteria;Enterobacteriales;Enterobacteriaceae
SILVA_128_SSURef_tax_silva.fasta.gz	Bacteria;Proteobacteria;Gammaproteobacteria;Enterobacteriales;Enterobacteriaceae
SILVA_128_SSURef_tax_silva_full_align_trunc.fasta.gz	Bacteria;Proteobacteria;Gammaproteobacteria;Enterobacteriales;Enterobacteriaceae
SILVA_132_SSURef_tax_silva.fasta.gz	Bacteria;Proteobacteria;Gammaproteobacteria;Enterobacteriales;Enterobacteriaceae
SILVA_132_SSURef_tax_silva_full_align_trunc.fasta.gz	Bacteria;Proteobacteria;Gammaproteobacteria;Enterobacteriales;Enterobacteriaceae
bac_ssu_r86.1_20180911.fna.gz	Bacteria;Proteobacteria;Gammaproteobacteria;Enterobacterales;Enterobacteriaceae
8	TACGAAGGGTGCAAGCGTTAATCGGAATTACTGGGCGTAAAGCGCGCGTAGGTGGTTCAGCAAGTTGGAT_CCTGTTTGCTCCCCACGCTTTCGCACCTCAGTGTCAGTATCAGTCCAGGTGGTCGCCTTCGCCACTGGTG
SILVA_123_SSURef_tax_silva.fasta.gz	Bacteria;Proteobacteria;Gammaproteobacteria;Pseudomonadales;Pseudomonadaceae;Pseudomonas
SILVA_123_SSURef_tax_silva_full_align_trunc.fasta.gz	Bacteria;Proteobacteria;Gammaproteobacteria;Pseudomonadales;Pseudomonadaceae;Pseudomonas
SILVA_128_SSURef_tax_silva.fasta.gz	Bacteria;Proteobacteria;Gammaproteobacteria;Pseudomonadales;Pseudomonadaceae;Pseudomonas
SILVA_128_SSURef_tax_silva_full_align_trunc.fasta.gz	Bacteria;Proteobacteria;Gammaproteobacteria;Pseudomonadales;Pseudomonadaceae;Pseudomonas
SILVA_132_SSURef_tax_silva.fasta.gz	Bacteria;Proteobacteria;Gammaproteobacteria;Pseudomonadales;Pseudomonadaceae;Pseudomonas
SILVA_132_SSURef_tax_silva_full_align_trunc.fasta.gz	Bacteria;Proteobacteria;Gammaproteobacteria;Pseudomonadales;Pseudomonadaceae;Pseudomonas
bac_ssu_r86.1_20180911.fna.gz	Bacteria;Proteobacteria;Gammaproteobacteria;Pseudomonadales;Pseudomonadaceae
9	TACGGAGGGTGCAAGCGNTACCCGGAATCACTGGGCGTAAAGGGCGTGTAGGCGGAAATTTAAGTCTGGT_CCGGTTTGCTCCCCACACTTTCGCGCCTCAGCGTCACCTTCTGTCCAGTAACTTGCCTTCGCCATTGGTG
SILVA_123_SSURef_tax_silva.fasta.gz	Bacteria;Deinococcus-Thermus;Deinococci;Deinococcales;Deinococcaceae;Deinococcus
SILVA_123_SSURef_tax_silva_full_align_trunc.fasta.gz	Bacteria;Deinococcus-Thermus;Deinococci;Deinococcales;Deinococcaceae;Deinococcus
SILVA_128_SSURef_tax_silva.fasta.gz	Bacteria;Deinococcus-Thermus;Deinococci;Deinococcales;Deinococcaceae;Deinococcus
SILVA_128_SSURef_tax_silva_full_align_trunc.fasta.gz	Bacteria;Deinococcus-Thermus;Deinococci;Deinococcales;Deinococcaceae;Deinococcus
SILVA_132_SSURef_tax_silva.fasta.gz	Bacteria;Deinococcus-Thermus;Deinococci;Deinococcales;Deinococcaceae;Deinococcus
SILVA_132_SSURef_tax_silva_full_align_trunc.fasta.gz	Bacteria;Deinococcus-Thermus;Deinococci;Deinococcales;Deinococcaceae;Deinococcus
bac_ssu_r86.1_20180911.fna.gz	Bacteria;Deinococcota;Deinococci;Deinococcales;Deinococcaceae;Deinococcus
10	TACGGAGGGTGCAAGCGNTACTCGGAATCACTGGGCGTAAAGAGCGCGTAGGCGGGATAGTCAGTCAGGT_CCTGTTTGCTCCCCACGCTTTCGCGCAATCAGCGTCAGTAATGTTCCAGCAGGTCGCCTTCGCAATGAGT
SILVA_123_SSURef_tax_silva.fasta.gz	Bacteria;Proteobacteria;Epsilonproteobacteria;Campylobacterales;Helicobacteraceae;Helicobacter
SILVA_123_SSURef_tax_silva_full_align_trunc.fasta.gz	Bacteria;Proteobacteria;Epsilonproteobacteria;Campylobacterales;Helicobacteraceae;Helicobacter
SILVA_128_SSURef_tax_silva.fasta.gz	Bacteria;Proteobacteria;Epsilonproteobacteria;Campylobacterales;Helicobacteraceae;Helicobacter
SILVA_128_SSURef_tax_silva_full_align_trunc.fasta.gz	Bacteria;Proteobacteria;Epsilonproteobacteria;Campylobacterales;Helicobacteraceae;Helicobacter
SILVA_132_SSURef_tax_silva.fasta.gz	Bacteria;Epsilonbacteraeota;Campylobacteria;Campylobacterales;Helicobacteraceae;Helicobacter
SILVA_132_SSURef_tax_silva_full_align_trunc.fasta.gz	Bacteria;Epsilonbacteraeota;Campylobacteria;Campylobacterales;Helicobacteraceae;Helicobacter
bac_ssu_r86.1_20180911.fna.gz	Bacteria;Campylobacterota;Campylobacteria;Campylobacterales;Helicobacteraceae;Helicobacter
11	TACAGAGGGTGCGAGCGTTAATCGGATTTACTGGGCGTAAAGCGTGCGTAGGCGGCTTATTAAGTCGGAT_CCTGTTTGCTCCCCATGCTTTCGTACCTCAGCGTCAGTATTAGGCCAGATGGCTGCCTTCGCCATCGGTA
SILVA_123_SSURef_tax_silva.fasta.gz	Bacteria;Proteobacteria;Gammaproteobacteria;Pseudomonadales;Moraxellaceae;Acinetobacter
SILVA_123_SSURef_tax_silva_full_align_trunc.fasta.gz	Bacteria;Proteobacteria;Gammaproteobacteria;Pseudomonadales;Moraxellaceae;Acinetobacter
SILVA_128_SSURef_tax_silva.fasta.gz	Bacteria;Proteobacteria;Gammaproteobacteria;Pseudomonadales;Moraxellaceae;Acinetobacter
SILVA_128_SSURef_tax_silva_full_align_trunc.fasta.gz	Bacteria;Proteobacteria;Gammaproteobacteria;Pseudomonadales;Moraxellaceae;Acinetobacter
SILVA_132_SSURef_tax_silva.fasta.gz	Bacteria;Proteobacteria;Gammaproteobacteria;Pseudomonadales;Moraxellaceae;Acinetobacter
SILVA_132_SSURef_tax_silva_full_align_trunc.fasta.gz	Bacteria;Proteobacteria;Gammaproteobacteria;Pseudomonadales;Moraxellaceae;Acinetobacter
bac_ssu_r86.1_20180911.fna.gz	Bacteria;Proteobacteria;Gammaproteobacteria;Pseudomonadales;Moraxellaceae;Acinetobacter
12	TACAGAGGGTGCGAGCGTTAATCGGATTTACTGGGCGTAAAGCGTGCGTAGGCGGCTTATTAAGTCGGAT_CCTGTTTGCTCCCCATGCTTTCGTACCTCAGCGTCAGTATTAGGCCAGATGGCTGCCTTCGCTATCGGTA
SILVA_123_SSURef_tax_silva.fasta.gz	Bacteria;Proteobacteria;Gammaproteobacteria;Pseudomonadales;Moraxellaceae;Acinetobacter
SILVA_123_SSURef_tax_silva_full_align_trunc.fasta.gz	Bacteria;Proteobacteria;Gammaproteobacteria;Pseudomonadales;Moraxellaceae;Acinetobacter
SILVA_128_SSURef_tax_silva.fasta.gz	Bacteria;Proteobacteria;Gammaproteobacteria;Pseudomonadales;Moraxellaceae;Acinetobacter
SILVA_128_SSURef_tax_silva_full_align_trunc.fasta.gz	Bacteria;Proteobacteria;Gammaproteobacteria;Pseudomonadales;Moraxellaceae;Acinetobacter
SILVA_132_SSURef_tax_silva.fasta.gz	Bacteria;Proteobacteria;Gammaproteobacteria;Pseudomonadales;Moraxellaceae;Acinetobacter
SILVA_132_SSURef_tax_silva_full_align_trunc.fasta.gz	Bacteria;Proteobacteria;Gammaproteobacteria;Pseudomonadales;Moraxellaceae;Acinetobacter
bac_ssu_r86.1_20180911.fna.gz	Bacteria;Proteobacteria;Gammaproteobacteria;Pseudomonadales;Moraxellaceae;Acinetobacter
13	TACGTAGGTGGCAAGCGNTGTCCGGATTTATTGGGCGTAAAGCGAGCGCAGGCGGTTTCTTAAGTCTGAT_CCTGTTTGCTCCCCACGCTTTCGAGCCTCAGCGTCAGTTACAGACCAGAGAGCCGCCTTCGCCACTGGTG
SILVA_123_SSURef_tax_silva.fasta.gz	Bacteria;Firmicutes;Bacilli;Lactobacillales;Enterococcaceae;Enterococcus
SILVA_123_SSURef_tax_silva_full_align_trunc.fasta.gz	Bacteria;Firmicutes;Bacilli;Lactobacillales;Enterococcaceae;Enterococcus
SILVA_128_SSURef_tax_silva.fasta.gz	Bacteria;Firmicutes;Bacilli;Lactobacillales;Enterococcaceae;Enterococcus
SILVA_128_SSURef_tax_silva_full_align_trunc.fasta.gz	Bacteria;Firmicutes;Bacilli;Lactobacillales;Enterococcaceae;Enterococcus
SILVA_132_SSURef_tax_silva.fasta.gz	Bacteria;Firmicutes;Bacilli;Lactobacillales;Enterococcaceae;Enterococcus
SILVA_132_SSURef_tax_silva_full_align_trunc.fasta.gz	Bacteria;Firmicutes;Bacilli;Lactobacillales;Enterococcaceae;Enterococcus
bac_ssu_r86.1_20180911.fna.gz	Bacteria;Firmicutes;Bacilli;Lactobacillales;Enterococcaceae
14	TACGTAGGTCCCGAGCGTTGTCCGGATTTATTGGGCGTAAAGGGAGCGCAGGCGGTCAGGAAAGTCTGGA_CCTGTTCGCTACCCACGCTTTCGAGCCTCAGCGTCAGTGACAGACCAGAGAGCCGCTTTCGCCACTGGTG
SILVA_123_SSURef_tax_silva.fasta.gz	Bacteria;Firmicutes;Bacilli;Lactobacillales;Streptococcaceae;Streptococcus
SILVA_123_SSURef_tax_silva_full_align_trunc.fasta.gz	Bacteria;Firmicutes;Bacilli;Lactobacillales;Streptococcaceae;Streptococcus
SILVA_128_SSURef_tax_silva.fasta.gz	Bacteria;Firmicutes;Bacilli;Lactobacillales;Streptococcaceae;Streptococcus
SILVA_128_SSURef_tax_silva_full_align_trunc.fasta.gz	Bacteria;Firmicutes;Bacilli;Lactobacillales;Streptococcaceae;Streptococcus
SILVA_132_SSURef_tax_silva.fasta.gz	Bacteria;Firmicutes;Bacilli;Lactobacillales;Streptococcaceae;Streptococcus
SILVA_132_SSURef_tax_silva_full_align_trunc.fasta.gz	Bacteria;Firmicutes;Bacilli;Lactobacillales;Streptococcaceae;Streptococcus
bac_ssu_r86.1_20180911.fna.gz	Bacteria;Firmicutes;Bacilli;Lactobacillales;Streptococcaceae;Streptococcus
15	TACGTAGGTGGCAAGCGTTATCCGGAATTATTGGGCGTAAAGCGCGCGCAGGTGGTTTCTTAAGTCTGAT_CCTGTTTGCTCCCCACGCTTTCGCGCCTCAGTGTCAGTTACAGACCAGAAAGTCGCCTTCGCTACTGGTG
SILVA_123_SSURef_tax_silva.fasta.gz	Bacteria;Firmicutes;Bacilli;Bacillales;Bacillaceae;Bacillus
SILVA_123_SSURef_tax_silva_full_align_trunc.fasta.gz	Bacteria;Firmicutes;Bacilli;Bacillales;Bacillaceae;Bacillus
SILVA_128_SSURef_tax_silva.fasta.gz	Bacteria;Firmicutes;Bacilli;Bacillales;Bacillaceae;Bacillus
SILVA_128_SSURef_tax_silva_full_align_trunc.fasta.gz	Bacteria;Firmicutes;Bacilli;Bacillales;Bacillaceae;Bacillus
SILVA_132_SSURef_tax_silva.fasta.gz	Bacteria;Firmicutes;Bacilli;Bacillales;Bacillaceae;Bacillus
SILVA_132_SSURef_tax_silva_full_align_trunc.fasta.gz	Bacteria;Firmicutes;Bacilli;Bacillales;Bacillaceae;Bacillus
bac_ssu_r86.1_20180911.fna.gz	Bacteria;Firmicutes;Bacilli;Bacillales;Bacillaceae_G;Bacillus_A
16	TACGGAGGGGGCTAGCGTTATTCGGAATTACTGGGCGTAAAGCGCACGTAGGCGGATCGGAAAGTCAGAG_CCTGTTTGCTCCCCACGCTTTCGCACCTCAGCGTCAGTATCGAGCCAGTGAGCCGCCTTCGCCACTGGTG
SILVA_123_SSURef_tax_silva.fasta.gz	Bacteria;Proteobacteria;Alphaproteobacteria;Rhodobacterales;Rhodobacteraceae;Rhodobacter
SILVA_123_SSURef_tax_silva_full_align_trunc.fasta.gz	Bacteria;Proteobacteria;Alphaproteobacteria;Rhodobacterales;Rhodobacteraceae;Rhodobacter
SILVA_128_SSURef_tax_silva.fasta.gz	Bacteria;Proteobacteria;Alphaproteobacteria;Rhodobacterales;Rhodobacteraceae;Rhodobacter
SILVA_128_SSURef_tax_silva_full_align_trunc.fasta.gz	Bacteria;Proteobacteria;Alphaproteobacteria;Rhodobacterales;Rhodobacteraceae;Rhodobacter
SILVA_132_SSURef_tax_silva.fasta.gz	Bacteria;Proteobacteria;Alphaproteobacteria;Rhodobacterales;Rhodobacteraceae;Rhodobacter
SILVA_132_SSURef_tax_silva_full_align_trunc.fasta.gz	Bacteria;Proteobacteria;Alphaproteobacteria;Rhodobacterales;Rhodobacteraceae;Rhodobacter
bac_ssu_r86.1_20180911.fna.gz	Bacteria;Proteobacteria;Alphaproteobacteria;Rhodobacterales;Rhodobacteraceae;Rhodobacter_A
17	TACGTAGGTGGCAAGCGTTATCCGGAATTATTGGGCGTAAAGCGCGCGCAGGTGGTTTCTTAAGTCTGAT_CCTGTTTGCTCCCCACGCTTTCGCGCCTCAGTGTCAGTTACAGACCAGAAAGTCGCCTTCGCCCCTGGTG
SILVA_123_SSURef_tax_silva.fasta.gz	Bacteria;Firmicutes;Bacilli;Bacillales;Bacillaceae;Bacillus
SILVA_123_SSURef_tax_silva_full_align_trunc.fasta.gz	Bacteria;Firmicutes;Bacilli;Bacillales;Bacillaceae;Bacillus
SILVA_128_SSURef_tax_silva.fasta.gz	Bacteria;Firmicutes;Bacilli;Bacillales;Bacillaceae;Bacillus
SILVA_128_SSURef_tax_silva_full_align_trunc.fasta.gz	Bacteria;Firmicutes;Bacilli;Bacillales;Bacillaceae;Bacillus
SILVA_132_SSURef_tax_silva.fasta.gz	Bacteria;Firmicutes;Bacilli;Bacillales;Bacillaceae;Bacillus
SILVA_132_SSURef_tax_silva_full_align_trunc.fasta.gz	Bacteria;Firmicutes;Bacilli;Bacillales;Bacillaceae;Bacillus
bac_ssu_r86.1_20180911.fna.gz	Bacteria;Firmicutes;Bacilli;Bacillales;Bacillaceae_G;Bacillus_A
18	TACGGAGGATCCGAGCGTTATCCGGATTTATTGGGTTTAAAGGGAGCGTAGATGGATGTTTAAGTCAGTT_CCTGTTTGATACCCACACTTTCGAGCCTCAATGTCAGTTGCAGCTTAGCAGGCTGCCTTCGCAATCGGAG
SILVA_123_SSURef_tax_silva.fasta.gz	Bacteria;Bacteroidetes;Bacteroidia;Bacteroidales;Bacteroidaceae;Bacteroides
SILVA_123_SSURef_tax_silva_full_align_trunc.fasta.gz	Bacteria;Bacteroidetes;Bacteroidia;Bacteroidales;Bacteroidaceae;Bacteroides
SILVA_128_SSURef_tax_silva.fasta.gz	Bacteria;Bacteroidetes;Bacteroidia;Bacteroidales;Bacteroidaceae;Bacteroides
SILVA_128_SSURef_tax_silva_full_align_trunc.fasta.gz	Bacteria;Bacteroidetes;Bacteroidia;Bacteroidales;Bacteroidaceae;Bacteroides
SILVA_132_SSURef_tax_silva.fasta.gz	Bacteria;Bacteroidetes;Bacteroidia;Bacteroidales;Bacteroidaceae;Bacteroides
SILVA_132_SSURef_tax_silva_full_align_trunc.fasta.gz	Bacteria;Bacteroidetes;Bacteroidia;Bacteroidales;Bacteroidaceae;Bacteroides
bac_ssu_r86.1_20180911.fna.gz	Bacteria;Bacteroidota
19	TACGGAGGGTGCAAGCGTTAATCGGAATTACTGGGCGTAAAGCGCACGCAGGCGGTTTGTTAAGTCAGAT_CCTGTTTGCTCCCCACGCTTTCGCACCTGAGCGTCAGTCTTCGTCCAGGGGGCCGCCTTCGCTACCGGTA
SILVA_123_SSURef_tax_silva.fasta.gz	Bacteria;Proteobacteria;Gammaproteobacteria;Enterobacteriales;Enterobacteriaceae
SILVA_123_SSURef_tax_silva_full_align_trunc.fasta.gz	Bacteria;Proteobacteria;Gammaproteobacteria;Enterobacteriales;Enterobacteriaceae
SILVA_128_SSURef_tax_silva.fasta.gz	Bacteria;Proteobacteria;Gammaproteobacteria;Enterobacteriales;Enterobacteriaceae
SILVA_128_SSURef_tax_silva_full_align_trunc.fasta.gz	Bacteria;Proteobacteria;Gammaproteobacteria;Enterobacteriales;Enterobacteriaceae
SILVA_132_SSURef_tax_silva.fasta.gz	Bacteria;Proteobacteria;Gammaproteobacteria;Enterobacteriales;Enterobacteriaceae
SILVA_132_SSURef_tax_silva_full_align_trunc.fasta.gz	Bacteria;Proteobacteria;Gammaproteobacteria;Enterobacteriales;Enterobacteriaceae
bac_ssu_r86.1_20180911.fna.gz	Bacteria;Proteobacteria;Gammaproteobacteria;Enterobacterales;Enterobacteriaceae
20	TACAGAGGGTGCGAGCGNTAATCGGATTTACTGGGCGTAAAGCGTGCGTAGGCGGCTTATTAAGTCGGAT_CCTGTTTGCTCCCCATGCTTTCGTACCTCAGCGTCAGTATTAGGCCAGATGGCTGCCTTCGCCATCGGTA
SILVA_123_SSURef_tax_silva.fasta.gz	Bacteria;Proteobacteria;Gammaproteobacteria;Pseudomonadales;Moraxellaceae;Acinetobacter
SILVA_123_SSURef_tax_silva_full_align_trunc.fasta.gz	Bacteria;Proteobacteria;Gammaproteobacteria;Pseudomonadales;Moraxellaceae;Acinetobacter
SILVA_128_SSURef_tax_silva.fasta.gz	Bacteria;Proteobacteria;Gammaproteobacteria;Pseudomonadales;Moraxellaceae;Acinetobacter
SILVA_128_SSURef_tax_silva_full_align_trunc.fasta.gz	Bacteria;Proteobacteria;Gammaproteobacteria;Pseudomonadales;Moraxellaceae;Acinetobacter
SILVA_132_SSURef_tax_silva.fasta.gz	Bacteria;Proteobacteria;Gammaproteobacteria;Pseudomonadales;Moraxellaceae;Acinetobacter
SILVA_132_SSURef_tax_silva_full_align_trunc.fasta.gz	Bacteria;Proteobacteria;Gammaproteobacteria;Pseudomonadales;Moraxellaceae;Acinetobacter
bac_ssu_r86.1_20180911.fna.gz	Bacteria;Proteobacteria;Gammaproteobacteria;Pseudomonadales;Moraxellaceae;Acinetobacter
21	TACGTAGGTGGCAAGCGTTGTCCGGATTTACTGGGCGTAAAGGGAGCGTAGGTGGATATTTAAGTGGGAT_CCTGTTTGCTCCCCACGCTTTCGAGCCTCAGTGTCAGTTACAGTCCAGAAAGTCGCCTTCGCTACTGGTA
SILVA_123_SSURef_tax_silva.fasta.gz	Bacteria;Firmicutes;Clostridia;Clostridiales;Clostridiaceae_1;Clostridium_sensu_stricto_1
SILVA_123_SSURef_tax_silva_full_align_trunc.fasta.gz	Bacteria;Firmicutes;Clostridia;Clostridiales;Clostridiaceae_1;Clostridium_sensu_stricto_1
SILVA_128_SSURef_tax_silva.fasta.gz	Bacteria;Firmicutes;Clostridia;Clostridiales;Clostridiaceae_1;Clostridium_sensu_stricto_1
SILVA_128_SSURef_tax_silva_full_align_trunc.fasta.gz	Bacteria;Firmicutes;Clostridia;Clostridiales;Clostridiaceae_1;Clostridium_sensu_stricto_1
SILVA_132_SSURef_tax_silva.fasta.gz	Bacteria;Firmicutes;Clostridia;Clostridiales;Clostridiaceae_1;Clostridium_sensu_stricto_1
SILVA_132_SSURef_tax_silva_full_align_trunc.fasta.gz	Bacteria;Firmicutes;Clostridia;Clostridiales;Clostridiaceae_1;Clostridium_sensu_stricto_1
bac_ssu_r86.1_20180911.fna.gz	Bacteria;Firmicutes_A;Clostridia;Clostridiales;Clostridiaceae;Clostridium
22	TACGTAGGTGGCAAGCGTTATCCGGCATTATTGGGCGTAAAGCGCGCGTAGGCGGTTTTTTAAGTCTGAT_CCTGTTTGATCCCCACGCTTTCGCACATCAGCGTCAGTTACAGACCAGAAAGTCGCCTTCGCCACTGGTG
SILVA_123_SSURef_tax_silva.fasta.gz	Bacteria;Firmicutes;Bacilli;Bacillales;Staphylococcaceae;Staphylococcus
SILVA_123_SSURef_tax_silva_full_align_trunc.fasta.gz	Bacteria;Firmicutes;Bacilli;Bacillales;Staphylococcaceae;Staphylococcus
SILVA_128_SSURef_tax_silva.fasta.gz	Bacteria;Firmicutes;Bacilli;Bacillales;Staphylococcaceae;Staphylococcus
SILVA_128_SSURef_tax_silva_full_align_trunc.fasta.gz	Bacteria;Firmicutes;Bacilli;Bacillales;Staphylococcaceae;Staphylococcus
SILVA_132_SSURef_tax_silva.fasta.gz	Bacteria;Firmicutes;Bacilli;Bacillales;Staphylococcaceae;Staphylococcus
SILVA_132_SSURef_tax_silva_full_align_trunc.fasta.gz	Bacteria;Firmicutes;Bacilli;Bacillales;Staphylococcaceae;Staphylococcus
bac_ssu_r86.1_20180911.fna.gz	Bacteria;Firmicutes;Bacilli;Staphylococcales;Staphylococcaceae;Staphylococcus
23	TACGGAGGATCCGAGCGTTATCCGGATTTATTGGGTTTAAAGGGAGCGTAGATGGATGTTTAAGTCAGTT_CCTGTTTGATACCCACACTTTCGAGCCTCAATGTCAGTTGCAGCTTAGCAGGCTGCCTTCGCTATCGGAG
SILVA_123_SSURef_tax_silva.fasta.gz	Bacteria;Bacteroidetes;Bacteroidia;Bacteroidales;Bacteroidaceae;Bacteroides
SILVA_123_SSURef_tax_silva_full_align_trunc.fasta.gz	Bacteria;Bacteroidetes;Bacteroidia;Bacteroidales;Bacteroidaceae;Bacteroides
SILVA_128_SSURef_tax_silva.fasta.gz	Bacteria;Bacteroidetes;Bacteroidia;Bacteroidales;Bacteroidaceae;Bacteroides
SILVA_128_SSURef_tax_silva_full_align_trunc.fasta.gz	Bacteria;Bacteroidetes;Bacteroidia;Bacteroidales;Bacteroidaceae;Bacteroides
SILVA_132_SSURef_tax_silva.fasta.gz	Bacteria;Bacteroidetes;Bacteroidia;Bacteroidales;Bacteroidaceae;Bacteroides
SILVA_132_SSURef_tax_silva_full_align_trunc.fasta.gz	Bacteria;Bacteroidetes;Bacteroidia;Bacteroidales;Bacteroidaceae;Bacteroides
bac_ssu_r86.1_20180911.fna.gz	Bacteria;Bacteroidota
24	TACGTAGGGTGCGAGCGTTAATCGGAATTACTGGGCGTAAAGCGGGCGCAGACGGTTACTTAAGCAGGAT_CCTGTTTGCTACCCACGCTTTCGGGCATGAACGTCAGTGTTGTCCCAGGAGGCTGCCTTCGCCATCGGTA
SILVA_123_SSURef_tax_silva.fasta.gz	Bacteria;Proteobacteria;Betaproteobacteria;Neisseriales;Neisseriaceae;Neisseria
SILVA_123_SSURef_tax_silva_full_align_trunc.fasta.gz	Bacteria;Proteobacteria;Betaproteobacteria;Neisseriales;Neisseriaceae;Neisseria
SILVA_128_SSURef_tax_silva.fasta.gz	Bacteria;Proteobacteria;Betaproteobacteria;Neisseriales;Neisseriaceae;Neisseria
SILVA_128_SSURef_tax_silva_full_align_trunc.fasta.gz	Bacteria;Proteobacteria;Betaproteobacteria;Neisseriales;Neisseriaceae;Neisseria
SILVA_132_SSURef_tax_silva.fasta.gz	Bacteria;Proteobacteria;Gammaproteobacteria;Betaproteobacteriales;Neisseriaceae;Neisseria
SILVA_132_SSURef_tax_silva_full_align_trunc.fasta.gz	Bacteria;Proteobacteria;Gammaproteobacteria;Betaproteobacteriales;Neisseriaceae;Neisseria
bac_ssu_r86.1_20180911.fna.gz	Bacteria;Proteobacteria;Gammaproteobacteria;Betaproteobacteriales;Neisseriaceae;Neisseria
25	TACGTAGGTGGCAAGCGNTATCCGGAATTATTGGGCGTAAAGCGCGCGCAGGTGGTTTCTTAAGTCTGAT_CCTGTTTGCTCCCCACGCTTTCGCGCCTCAGTGTCAGTTACAGACCAGAAAGTCGCCTTCGCCACTGGTG
SILVA_123_SSURef_tax_silva.fasta.gz	Bacteria;Firmicutes;Bacilli;Bacillales;Bacillaceae;Bacillus
SILVA_123_SSURef_tax_silva_full_align_trunc.fasta.gz	Bacteria;Firmicutes;Bacilli;Bacillales;Bacillaceae;Bacillus
SILVA_128_SSURef_tax_silva.fasta.gz	Bacteria;Firmicutes;Bacilli;Bacillales;Bacillaceae;Bacillus
SILVA_128_SSURef_tax_silva_full_align_trunc.fasta.gz	Bacteria;Firmicutes;Bacilli;Bacillales;Bacillaceae;Bacillus
SILVA_132_SSURef_tax_silva.fasta.gz	Bacteria;Firmicutes;Bacilli;Bacillales;Bacillaceae;Bacillus
SILVA_132_SSURef_tax_silva_full_align_trunc.fasta.gz	Bacteria;Firmicutes;Bacilli;Bacillales;Bacillaceae;Bacillus
bac_ssu_r86.1_20180911.fna.gz	Bacteria;Firmicutes;Bacilli;Bacillales;Bacillaceae_G;Bacillus_A
26	TACGGAGGGTGCAAGCGTTACTCGGAATCACTGGGCGTAAAGAGCGCGTAGGCGGGATAGTCAGTCAGGT_CCTGTTTGCTCCCCACGCTTTCGCGCAATCAGCGTCAGTAATGTTCCAGCAGGTCGCCTTCGTAATGAGT
SILVA_123_SSURef_tax_silva.fasta.gz	Bacteria;Proteobacteria;Epsilonproteobacteria;Campylobacterales;Helicobacteraceae;Helicobacter
SILVA_123_SSURef_tax_silva_full_align_trunc.fasta.gz	Bacteria;Proteobacteria;Epsilonproteobacteria;Campylobacterales;Helicobacteraceae;Helicobacter
SILVA_128_SSURef_tax_silva.fasta.gz	Bacteria;Proteobacteria;Epsilonproteobacteria;Campylobacterales;Helicobacteraceae;Helicobacter
SILVA_128_SSURef_tax_silva_full_align_trunc.fasta.gz	Bacteria;Proteobacteria;Epsilonproteobacteria;Campylobacterales;Helicobacteraceae;Helicobacter
SILVA_132_SSURef_tax_silva.fasta.gz	Bacteria;Epsilonbacteraeota;Campylobacteria;Campylobacterales;Helicobacteraceae;Helicobacter
SILVA_132_SSURef_tax_silva_full_align_trunc.fasta.gz	Bacteria;Epsilonbacteraeota;Campylobacteria;Campylobacterales;Helicobacteraceae;Helicobacter
bac_ssu_r86.1_20180911.fna.gz	Bacteria;Campylobacterota;Campylobacteria;Campylobacterales;Helicobacteraceae;Helicobacter
27	TACGTAGGTGGCAAGCGTTATCCGGAATTATTGGGCGTAAAGCGCGCGTAGGCGGTTTTTTAAGTCTGAT_CCTGTTTGATCCCCACGCTTTCGCACATCAGCGTCAGTTACAGACCAGAAAGTCGCCTTCGCTACTGGTG
SILVA_123_SSURef_tax_silva.fasta.gz	Bacteria;Firmicutes;Bacilli;Bacillales;Staphylococcaceae;Staphylococcus
SILVA_123_SSURef_tax_silva_full_align_trunc.fasta.gz	Bacteria;Firmicutes;Bacilli;Bacillales;Staphylococcaceae;Staphylococcus
SILVA_128_SSURef_tax_silva.fasta.gz	Bacteria;Firmicutes;Bacilli;Bacillales;Staphylococcaceae;Staphylococcus
SILVA_128_SSURef_tax_silva_full_align_trunc.fasta.gz	Bacteria;Firmicutes;Bacilli;Bacillales;Staphylococcaceae;Staphylococcus
SILVA_132_SSURef_tax_silva.fasta.gz	Bacteria;Firmicutes;Bacilli;Bacillales;Staphylococcaceae;Staphylococcus
SILVA_132_SSURef_tax_silva_full_align_trunc.fasta.gz	Bacteria;Firmicutes;Bacilli;Bacillales;Staphylococcaceae;Staphylococcus
bac_ssu_r86.1_20180911.fna.gz	Bacteria;Firmicutes;Bacilli;Staphylococcales;Staphylococcaceae;Staphylococcus
28	TACGTAGGTGGCAAGCGTTATCCGGAATTATTGGGCGTAAAGCGCGCGCAGGTGGTTTCTTAAGTCTGAT_CCTGTTTGCTCCCCACGCTTTCGCGCCTCAGTGTCAGTTACAGACCAGAAAGTCGCCTTCGCCACTGGTG
SILVA_123_SSURef_tax_silva.fasta.gz	Bacteria;Firmicutes;Bacilli;Bacillales;Bacillaceae;Bacillus
SILVA_123_SSURef_tax_silva_full_align_trunc.fasta.gz	Bacteria;Firmicutes;Bacilli;Bacillales;Bacillaceae;Bacillus
SILVA_128_SSURef_tax_silva.fasta.gz	Bacteria;Firmicutes;Bacilli;Bacillales;Bacillaceae;Bacillus
SILVA_128_SSURef_tax_silva_full_align_trunc.fasta.gz	Bacteria;Firmicutes;Bacilli;Bacillales;Bacillaceae;Bacillus
SILVA_132_SSURef_tax_silva.fasta.gz	Bacteria;Firmicutes;Bacilli;Bacillales;Bacillaceae;Bacillus
SILVA_132_SSURef_tax_silva_full_align_trunc.fasta.gz	Bacteria;Firmicutes;Bacilli;Bacillales;Bacillaceae;Bacillus
bac_ssu_r86.1_20180911.fna.gz	Bacteria;Firmicutes;Bacilli;Bacillales;Bacillaceae_G;Bacillus_A
29	TACGTAGGTGGCAAGCGTTGTCCGGATTTATTGGGCGTAAAGCGAGTGCAGGCGGTTCAATAAGTCTGAT_CCTGTTCGCTACCCATGCTTTCGAGCCTCAGCGTCAGTTGCAGACCAGAGAGCCGCCTTCGCCACTGGTG
SILVA_123_SSURef_tax_silva.fasta.gz	Bacteria;Firmicutes;Bacilli;Lactobacillales;Lactobacillaceae;Lactobacillus
SILVA_123_SSURef_tax_silva_full_align_trunc.fasta.gz	Bacteria;Firmicutes;Bacilli;Lactobacillales;Lactobacillaceae;Lactobacillus
SILVA_128_SSURef_tax_silva.fasta.gz	Bacteria;Firmicutes;Bacilli;Lactobacillales;Lactobacillaceae;Lactobacillus
SILVA_128_SSURef_tax_silva_full_align_trunc.fasta.gz	Bacteria;Firmicutes;Bacilli;Lactobacillales;Lactobacillaceae;Lactobacillus
SILVA_132_SSURef_tax_silva.fasta.gz	Bacteria;Firmicutes;Bacilli;Lactobacillales;Lactobacillaceae;Lactobacillus
SILVA_132_SSURef_tax_silva_full_align_trunc.fasta.gz	Bacteria;Firmicutes;Bacilli;Lactobacillales;Lactobacillaceae;Lactobacillus
bac_ssu_r86.1_20180911.fna.gz	Bacteria;Firmicutes;Bacilli;Lactobacillales;Lactobacillaceae;Lactobacillus
30	TACGTAGGGCGCGAGCGNTGTCCGGAATTATTGGGCGTAAAGGGCTTGTAGGCGGTTGGTCGCGTCTGCC_CCTGTTCGCTCCCCACGCTTTCGCTCCTCAGCGTCAGTAACGGCCCAGAGACCCGCCTTCGCCACCGGTG
SILVA_123_SSURef_tax_silva.fasta.gz	Bacteria;Actinobacteria;Actinobacteria;Actinomycetales;Actinomycetaceae;Actinomyces
SILVA_123_SSURef_tax_silva_full_align_trunc.fasta.gz	Bacteria;Actinobacteria;Actinobacteria;Actinomycetales;Actinomycetaceae;Actinomyces
SILVA_128_SSURef_tax_silva.fasta.gz	Bacteria;Actinobacteria;Actinobacteria;Actinomycetales;Actinomycetaceae;Actinomyces
SILVA_128_SSURef_tax_silva_full_align_trunc.fasta.gz	Bacteria;Actinobacteria;Actinobacteria;Actinomycetales;Actinomycetaceae;Actinomyces
SILVA_132_SSURef_tax_silva.fasta.gz	Bacteria;Actinobacteria;Actinobacteria;Actinomycetales;Actinomycetaceae;Actinomyces
SILVA_132_SSURef_tax_silva_full_align_trunc.fasta.gz	Bacteria;Actinobacteria;Actinobacteria;Actinomycetales;Actinomycetaceae;Actinomyces
bac_ssu_r86.1_20180911.fna.gz	Bacteria;Actinobacteriota;Actinobacteria;Actinomycetales;Actinomycetaceae;Actinomyces_B
31	TACGTAGGTCCCGAGCGTTGTCCGGATTTATTGGGCGTAAAGGGAGCGCAGGCGGTCAGGAAAGTCTGGA_CCTGTTCGCTACCCACGCTTTCGAGCCTCAGCGTCAGTGACAGACCAGAGAGCCGCTTTCGCTACTGGTG
SILVA_123_SSURef_tax_silva.fasta.gz	Bacteria;Firmicutes;Bacilli;Lactobacillales;Streptococcaceae;Streptococcus
SILVA_123_SSURef_tax_silva_full_align_trunc.fasta.gz	Bacteria;Firmicutes;Bacilli;Lactobacillales;Streptococcaceae;Streptococcus
SILVA_128_SSURef_tax_silva.fasta.gz	Bacteria;Firmicutes;Bacilli;Lactobacillales;Streptococcaceae;Streptococcus
SILVA_128_SSURef_tax_silva_full_align_trunc.fasta.gz	Bacteria;Firmicutes;Bacilli;Lactobacillales;Streptococcaceae;Streptococcus
SILVA_132_SSURef_tax_silva.fasta.gz	Bacteria;Firmicutes;Bacilli;Lactobacillales;Streptococcaceae;Streptococcus
SILVA_132_SSURef_tax_silva_full_align_trunc.fasta.gz	Bacteria;Firmicutes;Bacilli;Lactobacillales;Streptococcaceae;Streptococcus
bac_ssu_r86.1_20180911.fna.gz	Bacteria;Firmicutes;Bacilli;Lactobacillales;Streptococcaceae;Streptococcus
32	TACCGAGGGTGCGAGCGNTAATCGGATTTACTGGGCGTAAAGCGTGCGTAGGCGGCTTATTAAGTCGGAT_CCTGTTTGCTCCCCATGCTTTCGTACCTCAGCGTCAGTATTAGGCCAGATGGCTGCCTTCGCCATCGGTA
SILVA_123_SSURef_tax_silva.fasta.gz	Bacteria;Proteobacteria;Gammaproteobacteria;Pseudomonadales;Moraxellaceae;Acinetobacter
SILVA_123_SSURef_tax_silva_full_align_trunc.fasta.gz	Bacteria;Proteobacteria;Gammaproteobacteria;Pseudomonadales;Moraxellaceae;Acinetobacter
SILVA_128_SSURef_tax_silva.fasta.gz	Bacteria;Proteobacteria;Gammaproteobacteria;Pseudomonadales;Moraxellaceae;Acinetobacter
SILVA_128_SSURef_tax_silva_full_align_trunc.fasta.gz	Bacteria;Proteobacteria;Gammaproteobacteria;Pseudomonadales;Moraxellaceae;Acinetobacter
SILVA_132_SSURef_tax_silva.fasta.gz	Bacteria;Proteobacteria;Gammaproteobacteria;Pseudomonadales;Moraxellaceae;Acinetobacter
SILVA_132_SSURef_tax_silva_full_align_trunc.fasta.gz	Bacteria;Proteobacteria;Gammaproteobacteria;Pseudomonadales;Moraxellaceae;Acinetobacter
bac_ssu_r86.1_20180911.fna.gz	Bacteria;Proteobacteria;Gammaproteobacteria;Pseudomonadales;Moraxellaceae;Acinetobacter
33	TACGTAGGTCCCGAGCGNTGTCCGGATTTATTGGGCGTAAAGGGAGCGCAGGCGGTCAGGAAAGTCTGGA_CCTGTTCGCTACCCACGCTTTCGAGCCTCAGCGTCAGTGACAGACCAGAGAGCCGCTTTCGCCACTGGTG
SILVA_123_SSURef_tax_silva.fasta.gz	Bacteria;Firmicutes;Bacilli;Lactobacillales;Streptococcaceae;Streptococcus
SILVA_123_SSURef_tax_silva_full_align_trunc.fasta.gz	Bacteria;Firmicutes;Bacilli;Lactobacillales;Streptococcaceae;Streptococcus
SILVA_128_SSURef_tax_silva.fasta.gz	Bacteria;Firmicutes;Bacilli;Lactobacillales;Streptococcaceae;Streptococcus
SILVA_128_SSURef_tax_silva_full_align_trunc.fasta.gz	Bacteria;Firmicutes;Bacilli;Lactobacillales;Streptococcaceae;Streptococcus
SILVA_132_SSURef_tax_silva.fasta.gz	Bacteria;Firmicutes;Bacilli;Lactobacillales;Streptococcaceae;Streptococcus
SILVA_132_SSURef_tax_silva_full_align_trunc.fasta.gz	Bacteria;Firmicutes;Bacilli;Lactobacillales;Streptococcaceae;Streptococcus
bac_ssu_r86.1_20180911.fna.gz	Bacteria;Firmicutes;Bacilli;Lactobacillales;Streptococcaceae;Streptococcus
34	TACGTAGGTCCCGAGCGNTGTCCGGATTTATTGGGCGTAAAGCGAGCGCAGGCGGTTCTTTAAGTCTGAA_CCTGTTTGCTCCCCACGCTTTCGAGCCTCAGCGTCAGTTACAGACCAGAGAGCCGCTTTCGCCACCGGTG
SILVA_123_SSURef_tax_silva.fasta.gz	Bacteria;Firmicutes;Bacilli;Lactobacillales;Streptococcaceae;Streptococcus
SILVA_123_SSURef_tax_silva_full_align_trunc.fasta.gz	Bacteria;Firmicutes;Bacilli;Lactobacillales;Streptococcaceae;Streptococcus
SILVA_128_SSURef_tax_silva.fasta.gz	Bacteria;Firmicutes;Bacilli;Lactobacillales;Streptococcaceae;Streptococcus
SILVA_128_SSURef_tax_silva_full_align_trunc.fasta.gz	Bacteria;Firmicutes;Bacilli;Lactobacillales;Streptococcaceae;Streptococcus
SILVA_132_SSURef_tax_silva.fasta.gz	Bacteria;Firmicutes;Bacilli;Lactobacillales;Streptococcaceae;Streptococcus
SILVA_132_SSURef_tax_silva_full_align_trunc.fasta.gz	Bacteria;Firmicutes;Bacilli;Lactobacillales;Streptococcaceae;Streptococcus
bac_ssu_r86.1_20180911.fna.gz	Bacteria;Firmicutes;Bacilli;Lactobacillales;Streptococcaceae;Streptococcus
35	TACGTAGGGCGCGAGCGTTGTCCGGAATTATTGGGCGTAAAGGGCTTGTAGGCGGTTGGTCGCGTCTGCC_CCTGTTCGCTCCCCACGCTTTCGCTCCTCAGCGTCAGTAACGGCCCAGAGACCCGCCTTCGCCACCGGTG
SILVA_123_SSURef_tax_silva.fasta.gz	Bacteria;Actinobacteria;Actinobacteria;Actinomycetales;Actinomycetaceae;Actinomyces
SILVA_123_SSURef_tax_silva_full_align_trunc.fasta.gz	Bacteria;Actinobacteria;Actinobacteria;Actinomycetales;Actinomycetaceae;Actinomyces
SILVA_128_SSURef_tax_silva.fasta.gz	Bacteria;Actinobacteria;Actinobacteria;Actinomycetales;Actinomycetaceae;Actinomyces
SILVA_128_SSURef_tax_silva_full_align_trunc.fasta.gz	Bacteria;Actinobacteria;Actinobacteria;Actinomycetales;Actinomycetaceae;Actinomyces
SILVA_132_SSURef_tax_silva.fasta.gz	Bacteria;Actinobacteria;Actinobacteria;Actinomycetales;Actinomycetaceae;Actinomyces
SILVA_132_SSURef_tax_silva_full_align_trunc.fasta.gz	Bacteria;Actinobacteria;Actinobacteria;Actinomycetales;Actinomycetaceae;Actinomyces
bac_ssu_r86.1_20180911.fna.gz	Bacteria;Actinobacteriota;Actinobacteria;Actinomycetales;Actinomycetaceae;Actinomyces_B
36	TACGGAGGGTGCAAGCGTTAATCGGAATTACTGGGCGTAAAGCGCACGCAGGCGGTTTGTTAAGTCAGAT_TTTAACCTTGCGGCCGTACTCCCCAGGCGGTCGACTTAACGCGTTAGCTCCGGAAGCCACGCCTCAAGGG
SILVA_123_SSURef_tax_silva.fasta.gz	Bacteria;Proteobacteria;Gammaproteobacteria;Enterobacteriales
SILVA_123_SSURef_tax_silva.fasta.gz
SILVA_128_SSURef_tax_silva.fasta.gz	Bacteria;Proteobacteria;Gammaproteobacteria;Enterobacteriales
SILVA_128_SSURef_tax_silva.fasta.gz
SILVA_132_SSURef_tax_silva.fasta.gz	Bacteria;Proteobacteria;Gammaproteobacteria;Enterobacteriales
SILVA_132_SSURef_tax_silva.fasta.gz
SILVA_132_SSURef_tax_silva.fasta.gz
37	TACGGAGGATCCGAGCGNTATCCGGATTTATTGGGTTTAAAGGGAGCGTAGATGGATGTTTAAGTCAGTT_CCTGTTTGATACCCACACTTTCGAGCCTCAATGTCAGTTGCAGCTTAGCAGGCTGCCTTCGCAATCGGAG
SILVA_123_SSURef_tax_silva.fasta.gz	Bacteria;Bacteroidetes;Bacteroidia;Bacteroidales;Bacteroidaceae;Bacteroides
SILVA_123_SSURef_tax_silva_full_align_trunc.fasta.gz	Bacteria;Bacteroidetes;Bacteroidia;Bacteroidales;Bacteroidaceae;Bacteroides
SILVA_128_SSURef_tax_silva.fasta.gz	Bacteria;Bacteroidetes;Bacteroidia;Bacteroidales;Bacteroidaceae;Bacteroides
SILVA_128_SSURef_tax_silva_full_align_trunc.fasta.gz	Bacteria;Bacteroidetes;Bacteroidia;Bacteroidales;Bacteroidaceae;Bacteroides
SILVA_132_SSURef_tax_silva.fasta.gz	Bacteria;Bacteroidetes;Bacteroidia;Bacteroidales;Bacteroidaceae;Bacteroides
SILVA_132_SSURef_tax_silva_full_align_trunc.fasta.gz	Bacteria;Bacteroidetes;Bacteroidia;Bacteroidales;Bacteroidaceae;Bacteroides
bac_ssu_r86.1_20180911.fna.gz	Bacteria;Bacteroidota
38	TACGTAGGTGGCAAGCGTTATCCGGAATTATTGGGCGTAAAGCGCGCGTAGGCGGTTTTTTAAGTCTGAT_CCTGTTTGATCCCCACGCTTTCGCACATCAGCGTCAGTTACAGACCAGAAAGTCGCCTTCGCCCCTGGTG
SILVA_123_SSURef_tax_silva.fasta.gz	Bacteria;Firmicutes;Bacilli;Bacillales;Staphylococcaceae;Staphylococcus
SILVA_123_SSURef_tax_silva_full_align_trunc.fasta.gz	Bacteria;Firmicutes;Bacilli;Bacillales;Staphylococcaceae;Staphylococcus
SILVA_128_SSURef_tax_silva.fasta.gz	Bacteria;Firmicutes;Bacilli;Bacillales;Staphylococcaceae;Staphylococcus
SILVA_128_SSURef_tax_silva_full_align_trunc.fasta.gz	Bacteria;Firmicutes;Bacilli;Bacillales;Staphylococcaceae;Staphylococcus
SILVA_132_SSURef_tax_silva.fasta.gz	Bacteria;Firmicutes;Bacilli;Bacillales;Staphylococcaceae;Staphylococcus
SILVA_132_SSURef_tax_silva_full_align_trunc.fasta.gz	Bacteria;Firmicutes;Bacilli;Bacillales;Staphylococcaceae;Staphylococcus
bac_ssu_r86.1_20180911.fna.gz	Bacteria;Firmicutes;Bacilli;Staphylococcales;Staphylococcaceae;Staphylococcus
39	TACGTAGGTGGCAAGCGNTATCCGGAATTATTGGGCGTAAAGCGCGCGTAGGCGGTTTTTTAAGTCTGAT_CCTGTTTGATCCCCACGCTTTCGCACATCAGCGTCAGTTACAGACCAGAAAGTCGCCTTCGCCACTGGTG
SILVA_123_SSURef_tax_silva.fasta.gz	Bacteria;Firmicutes;Bacilli;Bacillales;Staphylococcaceae;Staphylococcus
SILVA_123_SSURef_tax_silva_full_align_trunc.fasta.gz	Bacteria;Firmicutes;Bacilli;Bacillales;Staphylococcaceae;Staphylococcus
SILVA_128_SSURef_tax_silva.fasta.gz	Bacteria;Firmicutes;Bacilli;Bacillales;Staphylococcaceae;Staphylococcus
SILVA_128_SSURef_tax_silva_full_align_trunc.fasta.gz	Bacteria;Firmicutes;Bacilli;Bacillales;Staphylococcaceae;Staphylococcus
SILVA_132_SSURef_tax_silva.fasta.gz	Bacteria;Firmicutes;Bacilli;Bacillales;Staphylococcaceae;Staphylococcus
SILVA_132_SSURef_tax_silva_full_align_trunc.fasta.gz	Bacteria;Firmicutes;Bacilli;Bacillales;Staphylococcaceae;Staphylococcus
bac_ssu_r86.1_20180911.fna.gz	Bacteria;Firmicutes;Bacilli;Staphylococcales;Staphylococcaceae;Staphylococcus
40	TACGTAGGGTGCGAGCGNTAATCGGAATTACTGGGCGTAAAGCGGGCGCAGACGGTTACTTAAGCAGGAT_CCTGTTTGCTACCCACGCTTTCGGGCATGAACGTCAGTGTTGTCCCAGGAGGCTGCCTTCGCCATCGGTA
SILVA_123_SSURef_tax_silva.fasta.gz	Bacteria;Proteobacteria;Betaproteobacteria;Neisseriales;Neisseriaceae;Neisseria
SILVA_123_SSURef_tax_silva_full_align_trunc.fasta.gz	Bacteria;Proteobacteria;Betaproteobacteria;Neisseriales;Neisseriaceae;Neisseria
SILVA_128_SSURef_tax_silva.fasta.gz	Bacteria;Proteobacteria;Betaproteobacteria;Neisseriales;Neisseriaceae;Neisseria
SILVA_128_SSURef_tax_silva_full_align_trunc.fasta.gz	Bacteria;Proteobacteria;Betaproteobacteria;Neisseriales;Neisseriaceae;Neisseria
SILVA_132_SSURef_tax_silva.fasta.gz	Bacteria;Proteobacteria;Gammaproteobacteria;Betaproteobacteriales;Neisseriaceae;Neisseria
SILVA_132_SSURef_tax_silva_full_align_trunc.fasta.gz	Bacteria;Proteobacteria;Gammaproteobacteria;Betaproteobacteriales;Neisseriaceae;Neisseria
bac_ssu_r86.1_20180911.fna.gz	Bacteria;Proteobacteria;Gammaproteobacteria;Betaproteobacteriales;Neisseriaceae;Neisseria
41	TACGTAGGTGGCAAGCGTTATCCGGAATTATTGGGCGTAAAGCGCGCGTAGGCGGTTTTTTAAGTCTGAT_CCTGTTTGATCCCCACGCTTTCGCACATCAGCGTCAGTTACAGACCAGAAAGTCGCCTTCGCCACTGGTG
SILVA_123_SSURef_tax_silva.fasta.gz	Bacteria;Firmicutes;Bacilli;Bacillales;Staphylococcaceae;Staphylococcus
SILVA_123_SSURef_tax_silva_full_align_trunc.fasta.gz	Bacteria;Firmicutes;Bacilli;Bacillales;Staphylococcaceae;Staphylococcus
SILVA_128_SSURef_tax_silva.fasta.gz	Bacteria;Firmicutes;Bacilli;Bacillales;Staphylococcaceae;Staphylococcus
SILVA_128_SSURef_tax_silva_full_align_trunc.fasta.gz	Bacteria;Firmicutes;Bacilli;Bacillales;Staphylococcaceae;Staphylococcus
SILVA_132_SSURef_tax_silva.fasta.gz	Bacteria;Firmicutes;Bacilli;Bacillales;Staphylococcaceae;Staphylococcus
SILVA_132_SSURef_tax_silva_full_align_trunc.fasta.gz	Bacteria;Firmicutes;Bacilli;Bacillales;Staphylococcaceae;Staphylococcus
bac_ssu_r86.1_20180911.fna.gz	Bacteria;Firmicutes;Bacilli;Staphylococcales;Staphylococcaceae;Staphylococcus
42	TACGGAGGGTGCAAGCGTTACTCGGAATCACTGGGCGTAAAGAGCGCGTAGGCGGGATAGTCAGTCAGGT_CCTGTTTGCTCCCCACGCTTTCGCGCAATCAGCGTCAGTAATGTTCCAGCAGGTCGCCTTCGCAATGAGT
SILVA_123_SSURef_tax_silva.fasta.gz	Bacteria;Proteobacteria;Epsilonproteobacteria;Campylobacterales;Helicobacteraceae;Helicobacter
SILVA_123_SSURef_tax_silva_full_align_trunc.fasta.gz	Bacteria;Proteobacteria;Epsilonproteobacteria;Campylobacterales;Helicobacteraceae;Helicobacter
SILVA_128_SSURef_tax_silva.fasta.gz	Bacteria;Proteobacteria;Epsilonproteobacteria;Campylobacterales;Helicobacteraceae;Helicobacter
SILVA_128_SSURef_tax_silva_full_align_trunc.fasta.gz	Bacteria;Proteobacteria;Epsilonproteobacteria;Campylobacterales;Helicobacteraceae;Helicobacter
SILVA_132_SSURef_tax_silva.fasta.gz	Bacteria;Epsilonbacteraeota;Campylobacteria;Campylobacterales;Helicobacteraceae;Helicobacter
SILVA_132_SSURef_tax_silva_full_align_trunc.fasta.gz	Bacteria;Epsilonbacteraeota;Campylobacteria;Campylobacterales;Helicobacteraceae;Helicobacter
bac_ssu_r86.1_20180911.fna.gz	Bacteria;Campylobacterota;Campylobacteria;Campylobacterales;Helicobacteraceae;Helicobacter
43	TACGGAGGGTGCAAGCGNTAATCGGAATTACTGGGCGTAAAGCGCACGCAGGCGGTTTGTTAAGTCAGAT_CCTGTTTGCTCCCCACGCTTTCGCACCTGAGCGTCAGTCTTCGTCCAGGGGGCCGCCTTCGCCACCGGTA
SILVA_123_SSURef_tax_silva.fasta.gz	Bacteria;Proteobacteria;Gammaproteobacteria;Enterobacteriales;Enterobacteriaceae
SILVA_123_SSURef_tax_silva_full_align_trunc.fasta.gz	Bacteria;Proteobacteria;Gammaproteobacteria;Enterobacteriales;Enterobacteriaceae
SILVA_128_SSURef_tax_silva.fasta.gz	Bacteria;Proteobacteria;Gammaproteobacteria;Enterobacteriales;Enterobacteriaceae
SILVA_128_SSURef_tax_silva_full_align_trunc.fasta.gz	Bacteria;Proteobacteria;Gammaproteobacteria;Enterobacteriales;Enterobacteriaceae
SILVA_132_SSURef_tax_silva.fasta.gz	Bacteria;Proteobacteria;Gammaproteobacteria;Enterobacteriales;Enterobacteriaceae
SILVA_132_SSURef_tax_silva_full_align_trunc.fasta.gz	Bacteria;Proteobacteria;Gammaproteobacteria;Enterobacteriales;Enterobacteriaceae
bac_ssu_r86.1_20180911.fna.gz	Bacteria;Proteobacteria;Gammaproteobacteria;Enterobacterales;Enterobacteriaceae
44	TACGTAGGTGGCAAGCGTTGTCCGGATTTATTGGGCGTAAAGCGCGCGCAGGCGGTCTTTTAAGTCTGAT_CCTGTTTGCTCCCCACGCTTTCGCGCCTCAGCGTCAGTTACAGACCAGAGAGTCGCCTTCGCCACTGGTG
SILVA_123_SSURef_tax_silva.fasta.gz	Bacteria;Firmicutes;Bacilli;Bacillales;Listeriaceae;Listeria
SILVA_123_SSURef_tax_silva_full_align_trunc.fasta.gz	Bacteria;Firmicutes;Bacilli;Bacillales;Listeriaceae;Listeria
SILVA_128_SSURef_tax_silva.fasta.gz	Bacteria;Firmicutes;Bacilli;Bacillales;Listeriaceae;Listeria
SILVA_128_SSURef_tax_silva_full_align_trunc.fasta.gz	Bacteria;Firmicutes;Bacilli;Bacillales;Listeriaceae;Listeria
SILVA_132_SSURef_tax_silva.fasta.gz	Bacteria;Firmicutes;Bacilli;Bacillales;Listeriaceae;Listeria
SILVA_132_SSURef_tax_silva_full_align_trunc.fasta.gz	Bacteria;Firmicutes;Bacilli;Bacillales;Listeriaceae;Listeria
bac_ssu_r86.1_20180911.fna.gz	Bacteria;Firmicutes;Bacilli;Lactobacillales;Listeriaceae;Listeria
45	TACGTAGGTCCCGAGCGTTGTCCGGATTTATTGGGCGTAAAGCGAGCGCAGGCGGTTAGATAAGTCTGAA_CCTGTTTGCTCCCCACGCTTTCGAGCCTCAGCGTCAGTTACAAGCCAGAGAGCCGCTTTCGCCACCGGTG
SILVA_123_SSURef_tax_silva.fasta.gz	Bacteria;Firmicutes;Bacilli;Lactobacillales;Streptococcaceae;Streptococcus
SILVA_123_SSURef_tax_silva_full_align_trunc.fasta.gz	Bacteria;Firmicutes;Bacilli;Lactobacillales;Streptococcaceae;Streptococcus
SILVA_128_SSURef_tax_silva.fasta.gz	Bacteria;Firmicutes;Bacilli;Lactobacillales;Streptococcaceae;Streptococcus
SILVA_128_SSURef_tax_silva_full_align_trunc.fasta.gz	Bacteria;Firmicutes;Bacilli;Lactobacillales;Streptococcaceae;Streptococcus
SILVA_132_SSURef_tax_silva.fasta.gz	Bacteria;Firmicutes;Bacilli;Lactobacillales;Streptococcaceae;Streptococcus
SILVA_132_SSURef_tax_silva_full_align_trunc.fasta.gz	Bacteria;Firmicutes;Bacilli;Lactobacillales;Streptococcaceae;Streptococcus
bac_ssu_r86.1_20180911.fna.gz	Bacteria;Firmicutes;Bacilli;Lactobacillales;Streptococcaceae;Streptococcus
46	TACGTAGGGCGCGAGCGTTGTCCGGAATTATTGGGCGTAAAGGGCTTGTAGGCGGTTGGTCGCGTCTGCC_CCTGTTCGCTCCCCACGCTTTCGCTCCTCAGCGTCAGTAACGGCCCAGAGACCCGCCTTCGCTACCGGTG
SILVA_123_SSURef_tax_silva.fasta.gz	Bacteria;Actinobacteria;Actinobacteria;Actinomycetales;Actinomycetaceae;Actinomyces
SILVA_123_SSURef_tax_silva_full_align_trunc.fasta.gz	Bacteria;Actinobacteria;Actinobacteria;Actinomycetales;Actinomycetaceae;Actinomyces
SILVA_128_SSURef_tax_silva.fasta.gz	Bacteria;Actinobacteria;Actinobacteria;Actinomycetales;Actinomycetaceae;Actinomyces
SILVA_128_SSURef_tax_silva_full_align_trunc.fasta.gz	Bacteria;Actinobacteria;Actinobacteria;Actinomycetales;Actinomycetaceae;Actinomyces
SILVA_132_SSURef_tax_silva.fasta.gz	Bacteria;Actinobacteria;Actinobacteria;Actinomycetales;Actinomycetaceae;Actinomyces
SILVA_132_SSURef_tax_silva_full_align_trunc.fasta.gz	Bacteria;Actinobacteria;Actinobacteria;Actinomycetales;Actinomycetaceae;Actinomyces
bac_ssu_r86.1_20180911.fna.gz	Bacteria;Actinobacteriota;Actinobacteria;Actinomycetales;Actinomycetaceae;Actinomyces_B
47	TACGGAGGATCCGAGCGTTATCCGGATTTATTGGGTTTAAAGGGAGCGTAGATGGATATTTAAGTCAGTT_CCTGTTTGATACCCACACTTTCGAGCCTCAATGTCAGTTGCAGCTTAGCAGGCTGCCTTCGCAATCGGAG
SILVA_123_SSURef_tax_silva.fasta.gz	Bacteria;Bacteroidetes;Bacteroidia;Bacteroidales;Bacteroidaceae;Bacteroides
SILVA_123_SSURef_tax_silva_full_align_trunc.fasta.gz	Bacteria;Bacteroidetes;Bacteroidia;Bacteroidales;Bacteroidaceae;Bacteroides
SILVA_128_SSURef_tax_silva.fasta.gz	Bacteria;Bacteroidetes;Bacteroidia;Bacteroidales;Bacteroidaceae;Bacteroides
SILVA_128_SSURef_tax_silva_full_align_trunc.fasta.gz	Bacteria;Bacteroidetes;Bacteroidia;Bacteroidales;Bacteroidaceae;Bacteroides
SILVA_132_SSURef_tax_silva.fasta.gz	Bacteria;Bacteroidetes;Bacteroidia;Bacteroidales;Bacteroidaceae;Bacteroides
SILVA_132_SSURef_tax_silva_full_align_trunc.fasta.gz	Bacteria;Bacteroidetes;Bacteroidia;Bacteroidales;Bacteroidaceae;Bacteroides
bac_ssu_r86.1_20180911.fna.gz	Bacteria;Bacteroidota
48	TACGTAGGTCCCGAGCGTTGTCCGGATTTATTGGGCGTAAAGCGAGCGCAGGCGGTTCTTTAAGTCTGAA_CCTGTTTGCTCCCCACGCTTTCGAGCCTCAGCGTCAGTTACAGACCAGAGAGCCGCTTTCGCTACCGGTG
SILVA_123_SSURef_tax_silva.fasta.gz	Bacteria;Firmicutes;Bacilli;Lactobacillales;Streptococcaceae;Streptococcus
SILVA_123_SSURef_tax_silva_full_align_trunc.fasta.gz	Bacteria;Firmicutes;Bacilli;Lactobacillales;Streptococcaceae;Streptococcus
SILVA_128_SSURef_tax_silva.fasta.gz	Bacteria;Firmicutes;Bacilli;Lactobacillales;Streptococcaceae;Streptococcus
SILVA_128_SSURef_tax_silva_full_align_trunc.fasta.gz	Bacteria;Firmicutes;Bacilli;Lactobacillales;Streptococcaceae;Streptococcus
SILVA_132_SSURef_tax_silva.fasta.gz	Bacteria;Firmicutes;Bacilli;Lactobacillales;Streptococcaceae;Streptococcus
SILVA_132_SSURef_tax_silva_full_align_trunc.fasta.gz	Bacteria;Firmicutes;Bacilli;Lactobacillales;Streptococcaceae;Streptococcus
bac_ssu_r86.1_20180911.fna.gz	Bacteria;Firmicutes;Bacilli;Lactobacillales;Streptococcaceae;Streptococcus
49	TACGTAGGGTGCGAGCGTTAATCGGAATTACTGGGCGTAAAGCGGGCGCAGACGGTTACTTAAGCAGGAT_CCTGTTTGCTACCCACGCTTTCGGGCATGAACGTCAGTGTTGTCCCAGGAGGCTGCCTTCGCTATCGGTA
SILVA_123_SSURef_tax_silva.fasta.gz	Bacteria;Proteobacteria;Betaproteobacteria;Neisseriales;Neisseriaceae;Neisseria
SILVA_123_SSURef_tax_silva_full_align_trunc.fasta.gz	Bacteria;Proteobacteria;Betaproteobacteria;Neisseriales;Neisseriaceae;Neisseria
SILVA_128_SSURef_tax_silva.fasta.gz	Bacteria;Proteobacteria;Betaproteobacteria;Neisseriales;Neisseriaceae;Neisseria
SILVA_128_SSURef_tax_silva_full_align_trunc.fasta.gz	Bacteria;Proteobacteria;Betaproteobacteria;Neisseriales;Neisseriaceae;Neisseria
SILVA_132_SSURef_tax_silva.fasta.gz	Bacteria;Proteobacteria;Gammaproteobacteria;Betaproteobacteriales;Neisseriaceae;Neisseria
SILVA_132_SSURef_tax_silva_full_align_trunc.fasta.gz	Bacteria;Proteobacteria;Gammaproteobacteria;Betaproteobacteriales;Neisseriaceae;Neisseria
bac_ssu_r86.1_20180911.fna.gz	Bacteria;Proteobacteria;Gammaproteobacteria;Betaproteobacteriales;Neisseriaceae;Neisseria
50	TACGTAGGTGGCAAGCGTTGTCCGGATTTATTGGGCGTAAAGCGAGCGCAGGCGGTTTCTTAAGTCTGAT_CCTGTTTGCTCCCCACGCTTTCGAGCCTCAGCGTCAGTTACAGACCAGAGAGCCGCCTTCGCTACTGGTG
SILVA_123_SSURef_tax_silva.fasta.gz	Bacteria;Firmicutes;Bacilli;Lactobacillales;Enterococcaceae;Enterococcus
SILVA_123_SSURef_tax_silva_full_align_trunc.fasta.gz	Bacteria;Firmicutes;Bacilli;Lactobacillales;Enterococcaceae;Enterococcus
SILVA_128_SSURef_tax_silva.fasta.gz	Bacteria;Firmicutes;Bacilli;Lactobacillales;Enterococcaceae;Enterococcus
SILVA_128_SSURef_tax_silva_full_align_trunc.fasta.gz	Bacteria;Firmicutes;Bacilli;Lactobacillales;Enterococcaceae;Enterococcus
SILVA_132_SSURef_tax_silva.fasta.gz	Bacteria;Firmicutes;Bacilli;Lactobacillales;Enterococcaceae;Enterococcus
SILVA_132_SSURef_tax_silva_full_align_trunc.fasta.gz	Bacteria;Firmicutes;Bacilli;Lactobacillales;Enterococcaceae;Enterococcus
bac_ssu_r86.1_20180911.fna.gz	Bacteria;Firmicutes;Bacilli;Lactobacillales;Enterococcaceae
51	TACGAAGGGTGCAAGCGNTAATCGGAATTACTGGGCGTAAAGCGCGCGTAGGTGGTTCAGCAAGTTGGAT_CCTGTTTGCTCCCCACGCTTTCGCACCTCAGTGTCAGTATCAGTCCAGGTGGTCGCCTTCGCCACTGGTG
SILVA_123_SSURef_tax_silva.fasta.gz	Bacteria;Proteobacteria;Gammaproteobacteria;Pseudomonadales;Pseudomonadaceae;Pseudomonas
SILVA_123_SSURef_tax_silva_full_align_trunc.fasta.gz	Bacteria;Proteobacteria;Gammaproteobacteria;Pseudomonadales;Pseudomonadaceae;Pseudomonas
SILVA_128_SSURef_tax_silva.fasta.gz	Bacteria;Proteobacteria;Gammaproteobacteria;Pseudomonadales;Pseudomonadaceae;Pseudomonas
SILVA_128_SSURef_tax_silva_full_align_trunc.fasta.gz	Bacteria;Proteobacteria;Gammaproteobacteria;Pseudomonadales;Pseudomonadaceae;Pseudomonas
SILVA_132_SSURef_tax_silva.fasta.gz	Bacteria;Proteobacteria;Gammaproteobacteria;Pseudomonadales;Pseudomonadaceae;Pseudomonas
SILVA_132_SSURef_tax_silva_full_align_trunc.fasta.gz	Bacteria;Proteobacteria;Gammaproteobacteria;Pseudomonadales;Pseudomonadaceae;Pseudomonas
bac_ssu_r86.1_20180911.fna.gz	Bacteria;Proteobacteria;Gammaproteobacteria;Pseudomonadales;Pseudomonadaceae
52	TACGGAAGGTCCGGGCGTTATCCGGATTTATTGGGTTTAAAGGGAGCGTAGGCCGGAGATTAAGCGTGTT_CCTGTTCGATACCCGCACTTTCGAGCTTCAGCGTCAGTTGCGCTCCAGTGAGCTGCCTTCGCAATCGGAG
SILVA_123_SSURef_tax_silva.fasta.gz	Bacteria;Bacteroidetes;Bacteroidia;Bacteroidales;Prevotellaceae;Prevotella_9
SILVA_123_SSURef_tax_silva_full_align_trunc.fasta.gz	Bacteria;Bacteroidetes;Bacteroidia;Bacteroidales;Prevotellaceae;Prevotella_9
SILVA_128_SSURef_tax_silva.fasta.gz	Bacteria;Bacteroidetes;Bacteroidia;Bacteroidales;Prevotellaceae;Prevotella_9
SILVA_128_SSURef_tax_silva_full_align_trunc.fasta.gz	Bacteria;Bacteroidetes;Bacteroidia;Bacteroidales;Prevotellaceae;Prevotella_9
SILVA_132_SSURef_tax_silva.fasta.gz	Bacteria;Bacteroidetes;Bacteroidia;Bacteroidales;Prevotellaceae;Prevotella_9
SILVA_132_SSURef_tax_silva_full_align_trunc.fasta.gz	Bacteria;Bacteroidetes;Bacteroidia;Bacteroidales;Prevotellaceae;Prevotella_9
bac_ssu_r86.1_20180911.fna.gz	Bacteria;Bacteroidota;Bacteroidia;Bacteroidales;Bacteroidaceae;Prevotella
53	TACGGAGGGTGCAAGCGTTACCCGGAATCACTGGGCGTAAAGGGCGTGTAGGCGGAAATTTAAGTCTGGT_CCGGTTTGCTCCCCACACTTTCGCGCCTCAGCGTCACCTTCTGTCCAGTAACTTGCCTTCGCTATTGGTG
SILVA_123_SSURef_tax_silva.fasta.gz	Bacteria;Deinococcus-Thermus;Deinococci;Deinococcales;Deinococcaceae;Deinococcus
SILVA_123_SSURef_tax_silva_full_align_trunc.fasta.gz	Bacteria;Deinococcus-Thermus;Deinococci;Deinococcales;Deinococcaceae;Deinococcus
SILVA_128_SSURef_tax_silva.fasta.gz	Bacteria;Deinococcus-Thermus;Deinococci;Deinococcales;Deinococcaceae;Deinococcus
SILVA_128_SSURef_tax_silva_full_align_trunc.fasta.gz	Bacteria;Deinococcus-Thermus;Deinococci;Deinococcales;Deinococcaceae;Deinococcus
SILVA_132_SSURef_tax_silva.fasta.gz	Bacteria;Deinococcus-Thermus;Deinococci;Deinococcales;Deinococcaceae;Deinococcus
SILVA_132_SSURef_tax_silva_full_align_trunc.fasta.gz	Bacteria;Deinococcus-Thermus;Deinococci;Deinococcales;Deinococcaceae;Deinococcus
bac_ssu_r86.1_20180911.fna.gz	Bacteria;Deinococcota;Deinococci;Deinococcales;Deinococcaceae;Deinococcus
54	TACGTAGGTGGCAAGCGTTGTCCGGATTTATTGGGCGTAAAGCGAGCGCAGGCGGTTTCTTAAGTCTGAT_CCTGTTTGCTCCCCACGCTTTCGAGCCTCAGCGTCAGTTACAGACCAGAGAGCCGCCTTCGCCACTGGTG
SILVA_123_SSURef_tax_silva.fasta.gz	Bacteria;Firmicutes;Bacilli;Lactobacillales;Enterococcaceae;Enterococcus
SILVA_123_SSURef_tax_silva_full_align_trunc.fasta.gz	Bacteria;Firmicutes;Bacilli;Lactobacillales;Enterococcaceae;Enterococcus
SILVA_128_SSURef_tax_silva.fasta.gz	Bacteria;Firmicutes;Bacilli;Lactobacillales;Enterococcaceae;Enterococcus
SILVA_128_SSURef_tax_silva_full_align_trunc.fasta.gz	Bacteria;Firmicutes;Bacilli;Lactobacillales;Enterococcaceae;Enterococcus
SILVA_132_SSURef_tax_silva.fasta.gz	Bacteria;Firmicutes;Bacilli;Lactobacillales;Enterococcaceae;Enterococcus
SILVA_132_SSURef_tax_silva_full_align_trunc.fasta.gz	Bacteria;Firmicutes;Bacilli;Lactobacillales;Enterococcaceae;Enterococcus
bac_ssu_r86.1_20180911.fna.gz	Bacteria;Firmicutes;Bacilli;Lactobacillales;Enterococcaceae
55	TACGTAGGTCCCGAGCGTTGTCCGGATTTATTGGGCGTAAAGCGAGCGCAGGCGGTTCTTTAAGTCTTAA_CCTGTTTGCTCCCCACGCTTTCGAGCCTCAGCGTCAGTTACAGACCAGAGAGCCGCTTTCGCCACCGGTG
SILVA_123_SSURef_tax_silva.fasta.gz	Bacteria;Firmicutes;Bacilli;Lactobacillales;Streptococcaceae;Streptococcus
SILVA_123_SSURef_tax_silva_full_align_trunc.fasta.gz	Bacteria;Firmicutes;Bacilli;Lactobacillales;Streptococcaceae;Streptococcus
SILVA_128_SSURef_tax_silva.fasta.gz	Bacteria;Firmicutes;Bacilli;Lactobacillales;Streptococcaceae;Streptococcus
SILVA_128_SSURef_tax_silva_full_align_trunc.fasta.gz	Bacteria;Firmicutes;Bacilli;Lactobacillales;Streptococcaceae;Streptococcus
SILVA_132_SSURef_tax_silva.fasta.gz	Bacteria;Firmicutes;Bacilli;Lactobacillales;Streptococcaceae;Streptococcus
SILVA_132_SSURef_tax_silva_full_align_trunc.fasta.gz	Bacteria;Firmicutes;Bacilli;Lactobacillales;Streptococcaceae;Streptococcus
bac_ssu_r86.1_20180911.fna.gz	Bacteria;Firmicutes;Bacilli;Lactobacillales;Streptococcaceae;Streptococcus
56	TACGTAGGTGGCAAGCGNTGTCCGGATTTACTGGGCGTAAAGGGAGCGTAGGTGGATATTTAAGTGGGAT_CCTGTTTGCTCCCCACGCTTTCGAGCCTCAGTGTCAGTTACAGTCCAGAAAGTCGCCTTCGCCACTGGTA
SILVA_123_SSURef_tax_silva.fasta.gz	Bacteria;Firmicutes;Clostridia;Clostridiales;Clostridiaceae_1;Clostridium_sensu_stricto_1
SILVA_123_SSURef_tax_silva_full_align_trunc.fasta.gz	Bacteria;Firmicutes;Clostridia;Clostridiales;Clostridiaceae_1;Clostridium_sensu_stricto_1
SILVA_128_SSURef_tax_silva.fasta.gz	Bacteria;Firmicutes;Clostridia;Clostridiales;Clostridiaceae_1;Clostridium_sensu_stricto_1
SILVA_128_SSURef_tax_silva_full_align_trunc.fasta.gz	Bacteria;Firmicutes;Clostridia;Clostridiales;Clostridiaceae_1;Clostridium_sensu_stricto_1
SILVA_132_SSURef_tax_silva.fasta.gz	Bacteria;Firmicutes;Clostridia;Clostridiales;Clostridiaceae_1;Clostridium_sensu_stricto_1
SILVA_132_SSURef_tax_silva_full_align_trunc.fasta.gz	Bacteria;Firmicutes;Clostridia;Clostridiales;Clostridiaceae_1;Clostridium_sensu_stricto_1
bac_ssu_r86.1_20180911.fna.gz	Bacteria;Firmicutes_A;Clostridia;Clostridiales;Clostridiaceae;Clostridium
57	TACGTAGGTCCCGAGCGTTGTCCGGATTTATTGGGCGTAAAGCGAGCGCAGGCGGTTCTTTTAGTCTGAA_CCTGTTTGCTCCCCACGCTTTCGAGCCTCAGCGTCAGTTACAGACCAGAGAGCCGCTTTCGCCACCGGTG
SILVA_123_SSURef_tax_silva.fasta.gz	Bacteria;Firmicutes;Bacilli;Lactobacillales;Streptococcaceae;Streptococcus
SILVA_123_SSURef_tax_silva_full_align_trunc.fasta.gz	Bacteria;Firmicutes;Bacilli;Lactobacillales;Streptococcaceae;Streptococcus
SILVA_128_SSURef_tax_silva.fasta.gz	Bacteria;Firmicutes;Bacilli;Lactobacillales;Streptococcaceae;Streptococcus
SILVA_128_SSURef_tax_silva_full_align_trunc.fasta.gz	Bacteria;Firmicutes;Bacilli;Lactobacillales;Streptococcaceae;Streptococcus
SILVA_132_SSURef_tax_silva.fasta.gz	Bacteria;Firmicutes;Bacilli;Lactobacillales;Streptococcaceae;Streptococcus
SILVA_132_SSURef_tax_silva_full_align_trunc.fasta.gz	Bacteria;Firmicutes;Bacilli;Lactobacillales;Streptococcaceae;Streptococcus
bac_ssu_r86.1_20180911.fna.gz	Bacteria;Firmicutes;Bacilli;Lactobacillales;Streptococcaceae;Streptococcus
58	TACGTAGGTGGCAAGCGTTGTCCGGATTTACTGGGCGTAAAGGGAGCGTAGGTGGATATTTAAGTGGGAT_CCTGTTTGCTCCCCACGCTTTCGAGCCTCAGTGTCAGTTACAGTCCAGAAAGTCGCCTTCGCCACTGGTA
SILVA_123_SSURef_tax_silva.fasta.gz	Bacteria;Firmicutes;Clostridia;Clostridiales;Clostridiaceae_1;Clostridium_sensu_stricto_1
SILVA_123_SSURef_tax_silva_full_align_trunc.fasta.gz	Bacteria;Firmicutes;Clostridia;Clostridiales;Clostridiaceae_1;Clostridium_sensu_stricto_1
SILVA_128_SSURef_tax_silva.fasta.gz	Bacteria;Firmicutes;Clostridia;Clostridiales;Clostridiaceae_1;Clostridium_sensu_stricto_1
SILVA_128_SSURef_tax_silva_full_align_trunc.fasta.gz	Bacteria;Firmicutes;Clostridia;Clostridiales;Clostridiaceae_1;Clostridium_sensu_stricto_1
SILVA_132_SSURef_tax_silva.fasta.gz	Bacteria;Firmicutes;Clostridia;Clostridiales;Clostridiaceae_1;Clostridium_sensu_stricto_1
SILVA_132_SSURef_tax_silva_full_align_trunc.fasta.gz	Bacteria;Firmicutes;Clostridia;Clostridiales;Clostridiaceae_1;Clostridium_sensu_stricto_1
bac_ssu_r86.1_20180911.fna.gz	Bacteria;Firmicutes_A;Clostridia;Clostridiales;Clostridiaceae;Clostridium
59	TACGGAGGATGCGAGCGTTATCCGGATTTATTGGGTTTAAAGGGTGCGTAGGTTGTTCGGTAAGTCAGCG_CCTGTTTGATACCCACGCCTTCGTGCTTCAGTGTCAGTCGCAGTATGGCAAGCTGCCTTCGCAATCGGAG
SILVA_123_SSURef_tax_silva.fasta.gz	Bacteria;Bacteroidetes;Bacteroidia;Bacteroidales;Porphyromonadaceae;Porphyromonas
SILVA_123_SSURef_tax_silva_full_align_trunc.fasta.gz	Bacteria;Bacteroidetes;Bacteroidia;Bacteroidales;Porphyromonadaceae;Porphyromonas
SILVA_128_SSURef_tax_silva.fasta.gz	Bacteria;Bacteroidetes;Bacteroidia;Bacteroidales;Porphyromonadaceae;Porphyromonas
SILVA_128_SSURef_tax_silva_full_align_trunc.fasta.gz	Bacteria;Bacteroidetes;Bacteroidia;Bacteroidales;Porphyromonadaceae;Porphyromonas
SILVA_132_SSURef_tax_silva.fasta.gz	Bacteria;Bacteroidetes;Bacteroidia;Bacteroidales;Porphyromonadaceae;Porphyromonas
SILVA_132_SSURef_tax_silva_full_align_trunc.fasta.gz	Bacteria;Bacteroidetes;Bacteroidia;Bacteroidales;Porphyromonadaceae;Porphyromonas
bac_ssu_r86.1_20180911.fna.gz	Bacteria;Bacteroidota;Bacteroidia;Bacteroidales;Porphyromonadaceae;Porphyromonas
60	TACGTAGGTCCCGAGCGTTGTCCGGATTTATTGGGCGTAAAGCGAGCGCAGGCGGTTCTTTAAGTCTGAA_CCTGTTTGCTCCCCACGCTTTCGAGCCTCAGCGTCAGTTACAGACCAGAGAGCCGCTTTCGCCACCGGTG
SILVA_123_SSURef_tax_silva.fasta.gz	Bacteria;Firmicutes;Bacilli;Lactobacillales;Streptococcaceae;Streptococcus
SILVA_123_SSURef_tax_silva_full_align_trunc.fasta.gz	Bacteria;Firmicutes;Bacilli;Lactobacillales;Streptococcaceae;Streptococcus
SILVA_128_SSURef_tax_silva.fasta.gz	Bacteria;Firmicutes;Bacilli;Lactobacillales;Streptococcaceae;Streptococcus
SILVA_128_SSURef_tax_silva_full_align_trunc.fasta.gz	Bacteria;Firmicutes;Bacilli;Lactobacillales;Streptococcaceae;Streptococcus
SILVA_132_SSURef_tax_silva.fasta.gz	Bacteria;Firmicutes;Bacilli;Lactobacillales;Streptococcaceae;Streptococcus
SILVA_132_SSURef_tax_silva_full_align_trunc.fasta.gz	Bacteria;Firmicutes;Bacilli;Lactobacillales;Streptococcaceae;Streptococcus
bac_ssu_r86.1_20180911.fna.gz	Bacteria;Firmicutes;Bacilli;Lactobacillales;Streptococcaceae;Streptococcus

## Sheet: mock14
1	TACGTAGGTGGCAAGCGTTGTCCGGATTTATTGGGCGTAAAGCGCGCGCAGGCGGTCTTTTAAGTCTGAT_CCTGTTTGCTCCCCACGCTTTCGCGCCTCAGCGTCAGTTACAGACCAGAGAGTCGCCTTCGCTACTGGTG
SILVA_123_SSURef_tax_silva.fasta.gz	Bacteria;Firmicutes;Bacilli;Bacillales;Listeriaceae;Listeria
SILVA_123_SSURef_tax_silva_full_align_trunc.fasta.gz	Bacteria;Firmicutes;Bacilli;Bacillales;Listeriaceae;Listeria
SILVA_128_SSURef_tax_silva.fasta.gz	Bacteria;Firmicutes;Bacilli;Bacillales;Listeriaceae;Listeria
SILVA_128_SSURef_tax_silva_full_align_trunc.fasta.gz	Bacteria;Firmicutes;Bacilli;Bacillales;Listeriaceae;Listeria
SILVA_132_SSURef_tax_silva.fasta.gz	Bacteria;Firmicutes;Bacilli;Bacillales;Listeriaceae;Listeria
SILVA_132_SSURef_tax_silva_full_align_trunc.fasta.gz	Bacteria;Firmicutes;Bacilli;Bacillales;Listeriaceae;Listeria
bac_ssu_r86.1_20180911.fna.gz	Bacteria;Firmicutes;Bacilli;Lactobacillales;Listeriaceae;Listeria
2	TACGAAGGGTGCAAGCGTTAATCGGAATTACTGGGCGTAAAGCGCGCGTAGGTGGTTCAGCAAGTTGGAT_CCTGTTTGCTCCCCACGCTTTCGCACCTCAGTGTCAGTATCAGTCCAGGTGGTCGCCTTCGCTACTGGTG
SILVA_123_SSURef_tax_silva.fasta.gz	Bacteria;Proteobacteria;Gammaproteobacteria;Pseudomonadales;Pseudomonadaceae;Pseudomonas
SILVA_123_SSURef_tax_silva_full_align_trunc.fasta.gz	Bacteria;Proteobacteria;Gammaproteobacteria;Pseudomonadales;Pseudomonadaceae;Pseudomonas
SILVA_128_SSURef_tax_silva.fasta.gz	Bacteria;Proteobacteria;Gammaproteobacteria;Pseudomonadales;Pseudomonadaceae;Pseudomonas
SILVA_128_SSURef_tax_silva_full_align_trunc.fasta.gz	Bacteria;Proteobacteria;Gammaproteobacteria;Pseudomonadales;Pseudomonadaceae;Pseudomonas
SILVA_132_SSURef_tax_silva.fasta.gz	Bacteria;Proteobacteria;Gammaproteobacteria;Pseudomonadales;Pseudomonadaceae;Pseudomonas
SILVA_132_SSURef_tax_silva_full_align_trunc.fasta.gz	Bacteria;Proteobacteria;Gammaproteobacteria;Pseudomonadales;Pseudomonadaceae;Pseudomonas
bac_ssu_r86.1_20180911.fna.gz	Bacteria;Proteobacteria;Gammaproteobacteria;Pseudomonadales;Pseudomonadaceae
3	TACGGAGGGTGCAAGCGTTACCCGGAATCACTGGGCGTAAAGGGCGTGTAGGCGGAAATTTAAGTCTGGT_CCGGTTTGCTCCCCACACTTTCGCGCCTCAGCGTCACCTTCTGTCCAGTAACTTGCCTTCGCCATTGGTG
SILVA_123_SSURef_tax_silva.fasta.gz	Bacteria;Deinococcus-Thermus;Deinococci;Deinococcales;Deinococcaceae;Deinococcus
SILVA_123_SSURef_tax_silva_full_align_trunc.fasta.gz	Bacteria;Deinococcus-Thermus;Deinococci;Deinococcales;Deinococcaceae;Deinococcus
SILVA_128_SSURef_tax_silva.fasta.gz	Bacteria;Deinococcus-Thermus;Deinococci;Deinococcales;Deinococcaceae;Deinococcus
SILVA_128_SSURef_tax_silva_full_align_trunc.fasta.gz	Bacteria;Deinococcus-Thermus;Deinococci;Deinococcales;Deinococcaceae;Deinococcus
SILVA_132_SSURef_tax_silva.fasta.gz	Bacteria;Deinococcus-Thermus;Deinococci;Deinococcales;Deinococcaceae;Deinococcus
SILVA_132_SSURef_tax_silva_full_align_trunc.fasta.gz	Bacteria;Deinococcus-Thermus;Deinococci;Deinococcales;Deinococcaceae;Deinococcus
bac_ssu_r86.1_20180911.fna.gz	Bacteria;Deinococcota;Deinococci;Deinococcales;Deinococcaceae;Deinococcus
4	TACGTAGGTGGCAAGCGNTGTCCGGATTTATTGGGCGTAAAGCGCGCGCAGGCGGTCTTTTAAGTCTGAT_CCTGTTTGCTCCCCACGCTTTCGCGCCTCAGCGTCAGTTACAGACCAGAGAGTCGCCTTCGCCACTGGTG
SILVA_123_SSURef_tax_silva.fasta.gz	Bacteria;Firmicutes;Bacilli;Bacillales;Listeriaceae;Listeria
SILVA_123_SSURef_tax_silva_full_align_trunc.fasta.gz	Bacteria;Firmicutes;Bacilli;Bacillales;Listeriaceae;Listeria
SILVA_128_SSURef_tax_silva.fasta.gz	Bacteria;Firmicutes;Bacilli;Bacillales;Listeriaceae;Listeria
SILVA_128_SSURef_tax_silva_full_align_trunc.fasta.gz	Bacteria;Firmicutes;Bacilli;Bacillales;Listeriaceae;Listeria
SILVA_132_SSURef_tax_silva.fasta.gz	Bacteria;Firmicutes;Bacilli;Bacillales;Listeriaceae;Listeria
SILVA_132_SSURef_tax_silva_full_align_trunc.fasta.gz	Bacteria;Firmicutes;Bacilli;Bacillales;Listeriaceae;Listeria
bac_ssu_r86.1_20180911.fna.gz	Bacteria;Firmicutes;Bacilli;Lactobacillales;Listeriaceae;Listeria
5	TACGTAGGTGGCAAGCGTTATCCGGAATTATTGGGCGTAAAGCGCGCGTAGGCGGTTTTTTAAGTCTGAT_CCTGTTTGATACCCACGCTTTCGCACATCAGCGTCAGTTACAGACCAGAAAGTCGCCTTCGCCACTGGTG
SILVA_123_SSURef_tax_silva.fasta.gz	Bacteria;Firmicutes;Bacilli;Bacillales;Staphylococcaceae;Staphylococcus
SILVA_123_SSURef_tax_silva_full_align_trunc.fasta.gz	Bacteria;Firmicutes;Bacilli;Bacillales;Staphylococcaceae;Staphylococcus
SILVA_128_SSURef_tax_silva.fasta.gz	Bacteria;Firmicutes;Bacilli;Bacillales;Staphylococcaceae;Staphylococcus
SILVA_128_SSURef_tax_silva_full_align_trunc.fasta.gz	Bacteria;Firmicutes;Bacilli;Bacillales;Staphylococcaceae;Staphylococcus
SILVA_132_SSURef_tax_silva.fasta.gz	Bacteria;Firmicutes;Bacilli;Bacillales;Staphylococcaceae;Staphylococcus
SILVA_132_SSURef_tax_silva_full_align_trunc.fasta.gz	Bacteria;Firmicutes;Bacilli;Bacillales;Staphylococcaceae;Staphylococcus
bac_ssu_r86.1_20180911.fna.gz	Bacteria;Firmicutes;Bacilli;Staphylococcales;Staphylococcaceae;Staphylococcus
6	TACGGAGGGTGCAAGCGTTAATCGGAATTACTGGGCGTAAAGCGCACGCAGGCGGTTTGTTAAGTCAGAT_CCTGTTTGCTCCCCACGCTTTCGCACCTGAGCGTCAGTCTTCGTCCAGGGGGCCGCCTTCGCCACCGGTA
SILVA_123_SSURef_tax_silva.fasta.gz	Bacteria;Proteobacteria;Gammaproteobacteria;Enterobacteriales;Enterobacteriaceae
SILVA_123_SSURef_tax_silva_full_align_trunc.fasta.gz	Bacteria;Proteobacteria;Gammaproteobacteria;Enterobacteriales;Enterobacteriaceae
SILVA_128_SSURef_tax_silva.fasta.gz	Bacteria;Proteobacteria;Gammaproteobacteria;Enterobacteriales;Enterobacteriaceae
SILVA_128_SSURef_tax_silva_full_align_trunc.fasta.gz	Bacteria;Proteobacteria;Gammaproteobacteria;Enterobacteriales;Enterobacteriaceae
SILVA_132_SSURef_tax_silva.fasta.gz	Bacteria;Proteobacteria;Gammaproteobacteria;Enterobacteriales;Enterobacteriaceae
SILVA_132_SSURef_tax_silva_full_align_trunc.fasta.gz	Bacteria;Proteobacteria;Gammaproteobacteria;Enterobacteriales;Enterobacteriaceae
bac_ssu_r86.1_20180911.fna.gz	Bacteria;Proteobacteria;Gammaproteobacteria;Enterobacterales;Enterobacteriaceae
7	TACGAAGGGTGCAAGCGTTAATCGGAATTACTGGGCGTAAAGCGCGCGTAGGTGGTTCAGCAAGTTGGAT_CCTGTTTGCTCCCCACGCTTTCGCACCTCAGTGTCAGTATCAGTCCAGGTGGTCGCCTTCGCCACTGGTG
SILVA_123_SSURef_tax_silva.fasta.gz	Bacteria;Proteobacteria;Gammaproteobacteria;Pseudomonadales;Pseudomonadaceae;Pseudomonas
SILVA_123_SSURef_tax_silva_full_align_trunc.fasta.gz	Bacteria;Proteobacteria;Gammaproteobacteria;Pseudomonadales;Pseudomonadaceae;Pseudomonas
SILVA_128_SSURef_tax_silva.fasta.gz	Bacteria;Proteobacteria;Gammaproteobacteria;Pseudomonadales;Pseudomonadaceae;Pseudomonas
SILVA_128_SSURef_tax_silva_full_align_trunc.fasta.gz	Bacteria;Proteobacteria;Gammaproteobacteria;Pseudomonadales;Pseudomonadaceae;Pseudomonas
SILVA_132_SSURef_tax_silva.fasta.gz	Bacteria;Proteobacteria;Gammaproteobacteria;Pseudomonadales;Pseudomonadaceae;Pseudomonas
SILVA_132_SSURef_tax_silva_full_align_trunc.fasta.gz	Bacteria;Proteobacteria;Gammaproteobacteria;Pseudomonadales;Pseudomonadaceae;Pseudomonas
bac_ssu_r86.1_20180911.fna.gz	Bacteria;Proteobacteria;Gammaproteobacteria;Pseudomonadales;Pseudomonadaceae
8	TACGGAGGGTGCAAGCGNTACCCGGAATCACTGGGCGTAAAGGGCGTGTAGGCGGAAATTTAAGTCTGGT_CCGGTTTGCTCCCCACACTTTCGCGCCTCAGCGTCACCTTCTGTCCAGTAACTTGCCTTCGCCATTGGTG
SILVA_123_SSURef_tax_silva.fasta.gz	Bacteria;Deinococcus-Thermus;Deinococci;Deinococcales;Deinococcaceae;Deinococcus
SILVA_123_SSURef_tax_silva_full_align_trunc.fasta.gz	Bacteria;Deinococcus-Thermus;Deinococci;Deinococcales;Deinococcaceae;Deinococcus
SILVA_128_SSURef_tax_silva.fasta.gz	Bacteria;Deinococcus-Thermus;Deinococci;Deinococcales;Deinococcaceae;Deinococcus
SILVA_128_SSURef_tax_silva_full_align_trunc.fasta.gz	Bacteria;Deinococcus-Thermus;Deinococci;Deinococcales;Deinococcaceae;Deinococcus
SILVA_132_SSURef_tax_silva.fasta.gz	Bacteria;Deinococcus-Thermus;Deinococci;Deinococcales;Deinococcaceae;Deinococcus
SILVA_132_SSURef_tax_silva_full_align_trunc.fasta.gz	Bacteria;Deinococcus-Thermus;Deinococci;Deinococcales;Deinococcaceae;Deinococcus
bac_ssu_r86.1_20180911.fna.gz	Bacteria;Deinococcota;Deinococci;Deinococcales;Deinococcaceae;Deinococcus
9	TACGGAGGGTGCAAGCGNTACTCGGAATCACTGGGCGTAAAGAGCGCGTAGGCGGGATAGTCAGTCAGGT_CCTGTTTGCTCCCCACGCTTTCGCGCAATCAGCGTCAGTAATGTTCCAGCAGGTCGCCTTCGCAATGAGT
SILVA_123_SSURef_tax_silva.fasta.gz	Bacteria;Proteobacteria;Epsilonproteobacteria;Campylobacterales;Helicobacteraceae;Helicobacter
SILVA_123_SSURef_tax_silva_full_align_trunc.fasta.gz	Bacteria;Proteobacteria;Epsilonproteobacteria;Campylobacterales;Helicobacteraceae;Helicobacter
SILVA_128_SSURef_tax_silva.fasta.gz	Bacteria;Proteobacteria;Epsilonproteobacteria;Campylobacterales;Helicobacteraceae;Helicobacter
SILVA_128_SSURef_tax_silva_full_align_trunc.fasta.gz	Bacteria;Proteobacteria;Epsilonproteobacteria;Campylobacterales;Helicobacteraceae;Helicobacter
SILVA_132_SSURef_tax_silva.fasta.gz	Bacteria;Epsilonbacteraeota;Campylobacteria;Campylobacterales;Helicobacteraceae;Helicobacter
SILVA_132_SSURef_tax_silva_full_align_trunc.fasta.gz	Bacteria;Epsilonbacteraeota;Campylobacteria;Campylobacterales;Helicobacteraceae;Helicobacter
bac_ssu_r86.1_20180911.fna.gz	Bacteria;Campylobacterota;Campylobacteria;Campylobacterales;Helicobacteraceae;Helicobacter
10	TACAGAGGGTGCGAGCGTTAATCGGATTTACTGGGCGTAAAGCGTGCGTAGGCGGCTTATTAAGTCGGAT_CCTGTTTGCTCCCCATGCTTTCGTACCTCAGCGTCAGTATTAGGCCAGATGGCTGCCTTCGCCATCGGTA
SILVA_123_SSURef_tax_silva.fasta.gz	Bacteria;Proteobacteria;Gammaproteobacteria;Pseudomonadales;Moraxellaceae;Acinetobacter
SILVA_123_SSURef_tax_silva_full_align_trunc.fasta.gz	Bacteria;Proteobacteria;Gammaproteobacteria;Pseudomonadales;Moraxellaceae;Acinetobacter
SILVA_128_SSURef_tax_silva.fasta.gz	Bacteria;Proteobacteria;Gammaproteobacteria;Pseudomonadales;Moraxellaceae;Acinetobacter
SILVA_128_SSURef_tax_silva_full_align_trunc.fasta.gz	Bacteria;Proteobacteria;Gammaproteobacteria;Pseudomonadales;Moraxellaceae;Acinetobacter
SILVA_132_SSURef_tax_silva.fasta.gz	Bacteria;Proteobacteria;Gammaproteobacteria;Pseudomonadales;Moraxellaceae;Acinetobacter
SILVA_132_SSURef_tax_silva_full_align_trunc.fasta.gz	Bacteria;Proteobacteria;Gammaproteobacteria;Pseudomonadales;Moraxellaceae;Acinetobacter
bac_ssu_r86.1_20180911.fna.gz	Bacteria;Proteobacteria;Gammaproteobacteria;Pseudomonadales;Moraxellaceae;Acinetobacter
11	TACAGAGGGTGCGAGCGTTAATCGGATTTACTGGGCGTAAAGCGTGCGTAGGCGGCTTATTAAGTCGGAT_CCTGTTTGCTCCCCATGCTTTCGTACCTCAGCGTCAGTATTAGGCCAGATGGCTGCCTTCGCTATCGGTA
SILVA_123_SSURef_tax_silva.fasta.gz	Bacteria;Proteobacteria;Gammaproteobacteria;Pseudomonadales;Moraxellaceae;Acinetobacter
SILVA_123_SSURef_tax_silva_full_align_trunc.fasta.gz	Bacteria;Proteobacteria;Gammaproteobacteria;Pseudomonadales;Moraxellaceae;Acinetobacter
SILVA_128_SSURef_tax_silva.fasta.gz	Bacteria;Proteobacteria;Gammaproteobacteria;Pseudomonadales;Moraxellaceae;Acinetobacter
SILVA_128_SSURef_tax_silva_full_align_trunc.fasta.gz	Bacteria;Proteobacteria;Gammaproteobacteria;Pseudomonadales;Moraxellaceae;Acinetobacter
SILVA_132_SSURef_tax_silva.fasta.gz	Bacteria;Proteobacteria;Gammaproteobacteria;Pseudomonadales;Moraxellaceae;Acinetobacter
SILVA_132_SSURef_tax_silva_full_align_trunc.fasta.gz	Bacteria;Proteobacteria;Gammaproteobacteria;Pseudomonadales;Moraxellaceae;Acinetobacter
bac_ssu_r86.1_20180911.fna.gz	Bacteria;Proteobacteria;Gammaproteobacteria;Pseudomonadales;Moraxellaceae;Acinetobacter
12	TACGTAGGTGGCAAGCGNTGTCCGGATTTATTGGGCGTAAAGCGAGCGCAGGCGGTTTCTTAAGTCTGAT_CCTGTTTGCTCCCCACGCTTTCGAGCCTCAGCGTCAGTTACAGACCAGAGAGCCGCCTTCGCCACTGGTG
SILVA_123_SSURef_tax_silva.fasta.gz	Bacteria;Firmicutes;Bacilli;Lactobacillales;Enterococcaceae;Enterococcus
SILVA_123_SSURef_tax_silva_full_align_trunc.fasta.gz	Bacteria;Firmicutes;Bacilli;Lactobacillales;Enterococcaceae;Enterococcus
SILVA_128_SSURef_tax_silva.fasta.gz	Bacteria;Firmicutes;Bacilli;Lactobacillales;Enterococcaceae;Enterococcus
SILVA_128_SSURef_tax_silva_full_align_trunc.fasta.gz	Bacteria;Firmicutes;Bacilli;Lactobacillales;Enterococcaceae;Enterococcus
SILVA_132_SSURef_tax_silva.fasta.gz	Bacteria;Firmicutes;Bacilli;Lactobacillales;Enterococcaceae;Enterococcus
SILVA_132_SSURef_tax_silva_full_align_trunc.fasta.gz	Bacteria;Firmicutes;Bacilli;Lactobacillales;Enterococcaceae;Enterococcus
bac_ssu_r86.1_20180911.fna.gz	Bacteria;Firmicutes;Bacilli;Lactobacillales;Enterococcaceae
13	TACGTAGGTCCCGAGCGTTGTCCGGATTTATTGGGCGTAAAGGGAGCGCAGGCGGTCAGGAAAGTCTGGA_CCTGTTCGCTACCCACGCTTTCGAGCCTCAGCGTCAGTGACAGACCAGAGAGCCGCTTTCGCCACTGGTG
SILVA_123_SSURef_tax_silva.fasta.gz	Bacteria;Firmicutes;Bacilli;Lactobacillales;Streptococcaceae;Streptococcus
SILVA_123_SSURef_tax_silva_full_align_trunc.fasta.gz	Bacteria;Firmicutes;Bacilli;Lactobacillales;Streptococcaceae;Streptococcus
SILVA_128_SSURef_tax_silva.fasta.gz	Bacteria;Firmicutes;Bacilli;Lactobacillales;Streptococcaceae;Streptococcus
SILVA_128_SSURef_tax_silva_full_align_trunc.fasta.gz	Bacteria;Firmicutes;Bacilli;Lactobacillales;Streptococcaceae;Streptococcus
SILVA_132_SSURef_tax_silva.fasta.gz	Bacteria;Firmicutes;Bacilli;Lactobacillales;Streptococcaceae;Streptococcus
SILVA_132_SSURef_tax_silva_full_align_trunc.fasta.gz	Bacteria;Firmicutes;Bacilli;Lactobacillales;Streptococcaceae;Streptococcus
bac_ssu_r86.1_20180911.fna.gz	Bacteria;Firmicutes;Bacilli;Lactobacillales;Streptococcaceae;Streptococcus
14	TACGTAGGTGGCAAGCGTTATCCGGAATTATTGGGCGTAAAGCGCGCGCAGGTGGTTTCTTAAGTCTGAT_CCTGTTTGCTCCCCACGCTTTCGCGCCTCAGTGTCAGTTACAGACCAGAAAGTCGCCTTCGCTACTGGTG
SILVA_123_SSURef_tax_silva.fasta.gz	Bacteria;Firmicutes;Bacilli;Bacillales;Bacillaceae;Bacillus
SILVA_123_SSURef_tax_silva_full_align_trunc.fasta.gz	Bacteria;Firmicutes;Bacilli;Bacillales;Bacillaceae;Bacillus
SILVA_128_SSURef_tax_silva.fasta.gz	Bacteria;Firmicutes;Bacilli;Bacillales;Bacillaceae;Bacillus
SILVA_128_SSURef_tax_silva_full_align_trunc.fasta.gz	Bacteria;Firmicutes;Bacilli;Bacillales;Bacillaceae;Bacillus
SILVA_132_SSURef_tax_silva.fasta.gz	Bacteria;Firmicutes;Bacilli;Bacillales;Bacillaceae;Bacillus
SILVA_132_SSURef_tax_silva_full_align_trunc.fasta.gz	Bacteria;Firmicutes;Bacilli;Bacillales;Bacillaceae;Bacillus
bac_ssu_r86.1_20180911.fna.gz	Bacteria;Firmicutes;Bacilli;Bacillales;Bacillaceae_G;Bacillus_A
15	TACGGAGGGGGCTAGCGTTATTCGGAATTACTGGGCGTAAAGCGCACGTAGGCGGATCGGAAAGTCAGAG_CCTGTTTGCTCCCCACGCTTTCGCACCTCAGCGTCAGTATCGAGCCAGTGAGCCGCCTTCGCCACTGGTG
SILVA_123_SSURef_tax_silva.fasta.gz	Bacteria;Proteobacteria;Alphaproteobacteria;Rhodobacterales;Rhodobacteraceae;Rhodobacter
SILVA_123_SSURef_tax_silva_full_align_trunc.fasta.gz	Bacteria;Proteobacteria;Alphaproteobacteria;Rhodobacterales;Rhodobacteraceae;Rhodobacter
SILVA_128_SSURef_tax_silva.fasta.gz	Bacteria;Proteobacteria;Alphaproteobacteria;Rhodobacterales;Rhodobacteraceae;Rhodobacter
SILVA_128_SSURef_tax_silva_full_align_trunc.fasta.gz	Bacteria;Proteobacteria;Alphaproteobacteria;Rhodobacterales;Rhodobacteraceae;Rhodobacter
SILVA_132_SSURef_tax_silva.fasta.gz	Bacteria;Proteobacteria;Alphaproteobacteria;Rhodobacterales;Rhodobacteraceae;Rhodobacter
SILVA_132_SSURef_tax_silva_full_align_trunc.fasta.gz	Bacteria;Proteobacteria;Alphaproteobacteria;Rhodobacterales;Rhodobacteraceae;Rhodobacter
bac_ssu_r86.1_20180911.fna.gz	Bacteria;Proteobacteria;Alphaproteobacteria;Rhodobacterales;Rhodobacteraceae;Rhodobacter_A
16	TACGTAGGTGGCAAGCGTTATCCGGAATTATTGGGCGTAAAGCGCGCGCAGGTGGTTTCTTAAGTCTGAT_CCTGTTTGCTCCCCACGCTTTCGCGCCTCAGTGTCAGTTACAGACCAGAAAGTCGCCTTCGCCCCTGGTG
SILVA_123_SSURef_tax_silva.fasta.gz	Bacteria;Firmicutes;Bacilli;Bacillales;Bacillaceae;Bacillus
SILVA_123_SSURef_tax_silva_full_align_trunc.fasta.gz	Bacteria;Firmicutes;Bacilli;Bacillales;Bacillaceae;Bacillus
SILVA_128_SSURef_tax_silva.fasta.gz	Bacteria;Firmicutes;Bacilli;Bacillales;Bacillaceae;Bacillus
SILVA_128_SSURef_tax_silva_full_align_trunc.fasta.gz	Bacteria;Firmicutes;Bacilli;Bacillales;Bacillaceae;Bacillus
SILVA_132_SSURef_tax_silva.fasta.gz	Bacteria;Firmicutes;Bacilli;Bacillales;Bacillaceae;Bacillus
SILVA_132_SSURef_tax_silva_full_align_trunc.fasta.gz	Bacteria;Firmicutes;Bacilli;Bacillales;Bacillaceae;Bacillus
bac_ssu_r86.1_20180911.fna.gz	Bacteria;Firmicutes;Bacilli;Bacillales;Bacillaceae_G;Bacillus_A
17	TACGGAGGATCCGAGCGTTATCCGGATTTATTGGGTTTAAAGGGAGCGTAGATGGATGTTTAAGTCAGTT_CCTGTTTGATACCCACACTTTCGAGCCTCAATGTCAGTTGCAGCTTAGCAGGCTGCCTTCGCAATCGGAG
SILVA_123_SSURef_tax_silva.fasta.gz	Bacteria;Bacteroidetes;Bacteroidia;Bacteroidales;Bacteroidaceae;Bacteroides
SILVA_123_SSURef_tax_silva_full_align_trunc.fasta.gz	Bacteria;Bacteroidetes;Bacteroidia;Bacteroidales;Bacteroidaceae;Bacteroides
SILVA_128_SSURef_tax_silva.fasta.gz	Bacteria;Bacteroidetes;Bacteroidia;Bacteroidales;Bacteroidaceae;Bacteroides
SILVA_128_SSURef_tax_silva_full_align_trunc.fasta.gz	Bacteria;Bacteroidetes;Bacteroidia;Bacteroidales;Bacteroidaceae;Bacteroides
SILVA_132_SSURef_tax_silva.fasta.gz	Bacteria;Bacteroidetes;Bacteroidia;Bacteroidales;Bacteroidaceae;Bacteroides
SILVA_132_SSURef_tax_silva_full_align_trunc.fasta.gz	Bacteria;Bacteroidetes;Bacteroidia;Bacteroidales;Bacteroidaceae;Bacteroides
bac_ssu_r86.1_20180911.fna.gz	Bacteria;Bacteroidota
18	TACGGAGGGTGCAAGCGTTAATCGGAATTACTGGGCGTAAAGCGCACGCAGGCGGTTTGTTAAGTCAGAT_CCTGTTTGCTCCCCACGCTTTCGCACCTGAGCGTCAGTCTTCGTCCAGGGGGCCGCCTTCGCTACCGGTA
SILVA_123_SSURef_tax_silva.fasta.gz	Bacteria;Proteobacteria;Gammaproteobacteria;Enterobacteriales;Enterobacteriaceae
SILVA_123_SSURef_tax_silva_full_align_trunc.fasta.gz	Bacteria;Proteobacteria;Gammaproteobacteria;Enterobacteriales;Enterobacteriaceae
SILVA_128_SSURef_tax_silva.fasta.gz	Bacteria;Proteobacteria;Gammaproteobacteria;Enterobacteriales;Enterobacteriaceae
SILVA_128_SSURef_tax_silva_full_align_trunc.fasta.gz	Bacteria;Proteobacteria;Gammaproteobacteria;Enterobacteriales;Enterobacteriaceae
SILVA_132_SSURef_tax_silva.fasta.gz	Bacteria;Proteobacteria;Gammaproteobacteria;Enterobacteriales;Enterobacteriaceae
SILVA_132_SSURef_tax_silva_full_align_trunc.fasta.gz	Bacteria;Proteobacteria;Gammaproteobacteria;Enterobacteriales;Enterobacteriaceae
bac_ssu_r86.1_20180911.fna.gz	Bacteria;Proteobacteria;Gammaproteobacteria;Enterobacterales;Enterobacteriaceae
19	TACAGAGGGTGCGAGCGNTAATCGGATTTACTGGGCGTAAAGCGTGCGTAGGCGGCTTATTAAGTCGGAT_CCTGTTTGCTCCCCATGCTTTCGTACCTCAGCGTCAGTATTAGGCCAGATGGCTGCCTTCGCCATCGGTA
SILVA_123_SSURef_tax_silva.fasta.gz	Bacteria;Proteobacteria;Gammaproteobacteria;Pseudomonadales;Moraxellaceae;Acinetobacter
SILVA_123_SSURef_tax_silva_full_align_trunc.fasta.gz	Bacteria;Proteobacteria;Gammaproteobacteria;Pseudomonadales;Moraxellaceae;Acinetobacter
SILVA_128_SSURef_tax_silva.fasta.gz	Bacteria;Proteobacteria;Gammaproteobacteria;Pseudomonadales;Moraxellaceae;Acinetobacter
SILVA_128_SSURef_tax_silva_full_align_trunc.fasta.gz	Bacteria;Proteobacteria;Gammaproteobacteria;Pseudomonadales;Moraxellaceae;Acinetobacter
SILVA_132_SSURef_tax_silva.fasta.gz	Bacteria;Proteobacteria;Gammaproteobacteria;Pseudomonadales;Moraxellaceae;Acinetobacter
SILVA_132_SSURef_tax_silva_full_align_trunc.fasta.gz	Bacteria;Proteobacteria;Gammaproteobacteria;Pseudomonadales;Moraxellaceae;Acinetobacter
bac_ssu_r86.1_20180911.fna.gz	Bacteria;Proteobacteria;Gammaproteobacteria;Pseudomonadales;Moraxellaceae;Acinetobacter
20	TACGTAGGTGGCAAGCGTTGTCCGGATTTACTGGGCGTAAAGGGAGCGTAGGTGGATATTTAAGTGGGAT_CCTGTTTGCTCCCCACGCTTTCGAGCCTCAGTGTCAGTTACAGTCCAGAAAGTCGCCTTCGCTACTGGTA
SILVA_123_SSURef_tax_silva.fasta.gz	Bacteria;Firmicutes;Clostridia;Clostridiales;Clostridiaceae_1;Clostridium_sensu_stricto_1
SILVA_123_SSURef_tax_silva_full_align_trunc.fasta.gz	Bacteria;Firmicutes;Clostridia;Clostridiales;Clostridiaceae_1;Clostridium_sensu_stricto_1
SILVA_128_SSURef_tax_silva.fasta.gz	Bacteria;Firmicutes;Clostridia;Clostridiales;Clostridiaceae_1;Clostridium_sensu_stricto_1
SILVA_128_SSURef_tax_silva_full_align_trunc.fasta.gz	Bacteria;Firmicutes;Clostridia;Clostridiales;Clostridiaceae_1;Clostridium_sensu_stricto_1
SILVA_132_SSURef_tax_silva.fasta.gz	Bacteria;Firmicutes;Clostridia;Clostridiales;Clostridiaceae_1;Clostridium_sensu_stricto_1
SILVA_132_SSURef_tax_silva_full_align_trunc.fasta.gz	Bacteria;Firmicutes;Clostridia;Clostridiales;Clostridiaceae_1;Clostridium_sensu_stricto_1
bac_ssu_r86.1_20180911.fna.gz	Bacteria;Firmicutes_A;Clostridia;Clostridiales;Clostridiaceae;Clostridium
21	TACGGAGGATCCGAGCGTTATCCGGATTTATTGGGTTTAAAGGGAGCGTAGATGGATGTTTAAGTCAGTT_CCTGTTTGATACCCACACTTTCGAGCCTCAATGTCAGTTGCAGCTTAGCAGGCTGCCTTCGCTATCGGAG
SILVA_123_SSURef_tax_silva.fasta.gz	Bacteria;Bacteroidetes;Bacteroidia;Bacteroidales;Bacteroidaceae;Bacteroides
SILVA_123_SSURef_tax_silva_full_align_trunc.fasta.gz	Bacteria;Bacteroidetes;Bacteroidia;Bacteroidales;Bacteroidaceae;Bacteroides
SILVA_128_SSURef_tax_silva.fasta.gz	Bacteria;Bacteroidetes;Bacteroidia;Bacteroidales;Bacteroidaceae;Bacteroides
SILVA_128_SSURef_tax_silva_full_align_trunc.fasta.gz	Bacteria;Bacteroidetes;Bacteroidia;Bacteroidales;Bacteroidaceae;Bacteroides
SILVA_132_SSURef_tax_silva.fasta.gz	Bacteria;Bacteroidetes;Bacteroidia;Bacteroidales;Bacteroidaceae;Bacteroides
SILVA_132_SSURef_tax_silva_full_align_trunc.fasta.gz	Bacteria;Bacteroidetes;Bacteroidia;Bacteroidales;Bacteroidaceae;Bacteroides
bac_ssu_r86.1_20180911.fna.gz	Bacteria;Bacteroidota
22	TACGTAGGGTGCGAGCGTTAATCGGAATTACTGGGCGTAAAGCGGGCGCAGACGGTTACTTAAGCAGGAT_CCTGTTTGCTACCCACGCTTTCGGGCATGAACGTCAGTGTTGTCCCAGGAGGCTGCCTTCGCCATCGGTA
SILVA_123_SSURef_tax_silva.fasta.gz	Bacteria;Proteobacteria;Betaproteobacteria;Neisseriales;Neisseriaceae;Neisseria
SILVA_123_SSURef_tax_silva_full_align_trunc.fasta.gz	Bacteria;Proteobacteria;Betaproteobacteria;Neisseriales;Neisseriaceae;Neisseria
SILVA_128_SSURef_tax_silva.fasta.gz	Bacteria;Proteobacteria;Betaproteobacteria;Neisseriales;Neisseriaceae;Neisseria
SILVA_128_SSURef_tax_silva_full_align_trunc.fasta.gz	Bacteria;Proteobacteria;Betaproteobacteria;Neisseriales;Neisseriaceae;Neisseria
SILVA_132_SSURef_tax_silva.fasta.gz	Bacteria;Proteobacteria;Gammaproteobacteria;Betaproteobacteriales;Neisseriaceae;Neisseria
SILVA_132_SSURef_tax_silva_full_align_trunc.fasta.gz	Bacteria;Proteobacteria;Gammaproteobacteria;Betaproteobacteriales;Neisseriaceae;Neisseria
bac_ssu_r86.1_20180911.fna.gz	Bacteria;Proteobacteria;Gammaproteobacteria;Betaproteobacteriales;Neisseriaceae;Neisseria
23	TACGTAGGTGGCAAGCGNTATCCGGAATTATTGGGCGTAAAGCGCGCGCAGGTGGTTTCTTAAGTCTGAT_CCTGTTTGCTCCCCACGCTTTCGCGCCTCAGTGTCAGTTACAGACCAGAAAGTCGCCTTCGCCACTGGTG
SILVA_123_SSURef_tax_silva.fasta.gz	Bacteria;Firmicutes;Bacilli;Bacillales;Bacillaceae;Bacillus
SILVA_123_SSURef_tax_silva_full_align_trunc.fasta.gz	Bacteria;Firmicutes;Bacilli;Bacillales;Bacillaceae;Bacillus
SILVA_128_SSURef_tax_silva.fasta.gz	Bacteria;Firmicutes;Bacilli;Bacillales;Bacillaceae;Bacillus
SILVA_128_SSURef_tax_silva_full_align_trunc.fasta.gz	Bacteria;Firmicutes;Bacilli;Bacillales;Bacillaceae;Bacillus
SILVA_132_SSURef_tax_silva.fasta.gz	Bacteria;Firmicutes;Bacilli;Bacillales;Bacillaceae;Bacillus
SILVA_132_SSURef_tax_silva_full_align_trunc.fasta.gz	Bacteria;Firmicutes;Bacilli;Bacillales;Bacillaceae;Bacillus
bac_ssu_r86.1_20180911.fna.gz	Bacteria;Firmicutes;Bacilli;Bacillales;Bacillaceae_G;Bacillus_A
24	TACGGAGGGTGCAAGCGTTACTCGGAATCACTGGGCGTAAAGAGCGCGTAGGCGGGATAGTCAGTCAGGT_CCTGTTTGCTCCCCACGCTTTCGCGCAATCAGCGTCAGTAATGTTCCAGCAGGTCGCCTTCGTAATGAGT
SILVA_123_SSURef_tax_silva.fasta.gz	Bacteria;Proteobacteria;Epsilonproteobacteria;Campylobacterales;Helicobacteraceae;Helicobacter
SILVA_123_SSURef_tax_silva_full_align_trunc.fasta.gz	Bacteria;Proteobacteria;Epsilonproteobacteria;Campylobacterales;Helicobacteraceae;Helicobacter
SILVA_128_SSURef_tax_silva.fasta.gz	Bacteria;Proteobacteria;Epsilonproteobacteria;Campylobacterales;Helicobacteraceae;Helicobacter
SILVA_128_SSURef_tax_silva_full_align_trunc.fasta.gz	Bacteria;Proteobacteria;Epsilonproteobacteria;Campylobacterales;Helicobacteraceae;Helicobacter
SILVA_132_SSURef_tax_silva.fasta.gz	Bacteria;Epsilonbacteraeota;Campylobacteria;Campylobacterales;Helicobacteraceae;Helicobacter
SILVA_132_SSURef_tax_silva_full_align_trunc.fasta.gz	Bacteria;Epsilonbacteraeota;Campylobacteria;Campylobacterales;Helicobacteraceae;Helicobacter
bac_ssu_r86.1_20180911.fna.gz	Bacteria;Campylobacterota;Campylobacteria;Campylobacterales;Helicobacteraceae;Helicobacter
25	TACGTAGGTGGCAAGCGTTATCCGGAATTATTGGGCGTAAAGCGCGCGTAGGCGGTTTTTTAAGTCTGAT_CCTGTTTGATCCCCACGCTTTCGCACATCAGCGTCAGTTACAGACCAGAAAGTCGCCTTCGCTACTGGTG
SILVA_123_SSURef_tax_silva.fasta.gz	Bacteria;Firmicutes;Bacilli;Bacillales;Staphylococcaceae;Staphylococcus
SILVA_123_SSURef_tax_silva_full_align_trunc.fasta.gz	Bacteria;Firmicutes;Bacilli;Bacillales;Staphylococcaceae;Staphylococcus
SILVA_128_SSURef_tax_silva.fasta.gz	Bacteria;Firmicutes;Bacilli;Bacillales;Staphylococcaceae;Staphylococcus
SILVA_128_SSURef_tax_silva_full_align_trunc.fasta.gz	Bacteria;Firmicutes;Bacilli;Bacillales;Staphylococcaceae;Staphylococcus
SILVA_132_SSURef_tax_silva.fasta.gz	Bacteria;Firmicutes;Bacilli;Bacillales;Staphylococcaceae;Staphylococcus
SILVA_132_SSURef_tax_silva_full_align_trunc.fasta.gz	Bacteria;Firmicutes;Bacilli;Bacillales;Staphylococcaceae;Staphylococcus
bac_ssu_r86.1_20180911.fna.gz	Bacteria;Firmicutes;Bacilli;Staphylococcales;Staphylococcaceae;Staphylococcus
26	TACGTAGGTGGCAAGCGTTGTCCGGATTTATTGGGCGTAAAGCGAGTGCAGGCGGTTCAATAAGTCTGAT_CCTGTTCGCTACCCATGCTTTCGAGCCTCAGCGTCAGTTGCAGACCAGAGAGCCGCCTTCGCCACTGGTG
SILVA_123_SSURef_tax_silva.fasta.gz	Bacteria;Firmicutes;Bacilli;Lactobacillales;Lactobacillaceae;Lactobacillus
SILVA_123_SSURef_tax_silva_full_align_trunc.fasta.gz	Bacteria;Firmicutes;Bacilli;Lactobacillales;Lactobacillaceae;Lactobacillus
SILVA_128_SSURef_tax_silva.fasta.gz	Bacteria;Firmicutes;Bacilli;Lactobacillales;Lactobacillaceae;Lactobacillus
SILVA_128_SSURef_tax_silva_full_align_trunc.fasta.gz	Bacteria;Firmicutes;Bacilli;Lactobacillales;Lactobacillaceae;Lactobacillus
SILVA_132_SSURef_tax_silva.fasta.gz	Bacteria;Firmicutes;Bacilli;Lactobacillales;Lactobacillaceae;Lactobacillus
SILVA_132_SSURef_tax_silva_full_align_trunc.fasta.gz	Bacteria;Firmicutes;Bacilli;Lactobacillales;Lactobacillaceae;Lactobacillus
bac_ssu_r86.1_20180911.fna.gz	Bacteria;Firmicutes;Bacilli;Lactobacillales;Lactobacillaceae;Lactobacillus
27	TACGTAGGGCGCGAGCGNTGTCCGGAATTATTGGGCGTAAAGGGCTTGTAGGCGGTTGGTCGCGTCTGCC_CCTGTTCGCTCCCCACGCTTTCGCTCCTCAGCGTCAGTAACGGCCCAGAGACCCGCCTTCGCCACCGGTG
SILVA_123_SSURef_tax_silva.fasta.gz	Bacteria;Actinobacteria;Actinobacteria;Actinomycetales;Actinomycetaceae;Actinomyces
SILVA_123_SSURef_tax_silva_full_align_trunc.fasta.gz	Bacteria;Actinobacteria;Actinobacteria;Actinomycetales;Actinomycetaceae;Actinomyces
SILVA_128_SSURef_tax_silva.fasta.gz	Bacteria;Actinobacteria;Actinobacteria;Actinomycetales;Actinomycetaceae;Actinomyces
SILVA_128_SSURef_tax_silva_full_align_trunc.fasta.gz	Bacteria;Actinobacteria;Actinobacteria;Actinomycetales;Actinomycetaceae;Actinomyces
SILVA_132_SSURef_tax_silva.fasta.gz	Bacteria;Actinobacteria;Actinobacteria;Actinomycetales;Actinomycetaceae;Actinomyces
SILVA_132_SSURef_tax_silva_full_align_trunc.fasta.gz	Bacteria;Actinobacteria;Actinobacteria;Actinomycetales;Actinomycetaceae;Actinomyces
bac_ssu_r86.1_20180911.fna.gz	Bacteria;Actinobacteriota;Actinobacteria;Actinomycetales;Actinomycetaceae;Actinomyces_B
28	TACGTAGGTCCCGAGCGTTGTCCGGATTTATTGGGCGTAAAGGGAGCGCAGGCGGTCAGGAAAGTCTGGA_CCTGTTCGCTACCCACGCTTTCGAGCCTCAGCGTCAGTGACAGACCAGAGAGCCGCTTTCGCTACTGGTG
SILVA_123_SSURef_tax_silva.fasta.gz	Bacteria;Firmicutes;Bacilli;Lactobacillales;Streptococcaceae;Streptococcus
SILVA_123_SSURef_tax_silva_full_align_trunc.fasta.gz	Bacteria;Firmicutes;Bacilli;Lactobacillales;Streptococcaceae;Streptococcus
SILVA_128_SSURef_tax_silva.fasta.gz	Bacteria;Firmicutes;Bacilli;Lactobacillales;Streptococcaceae;Streptococcus
SILVA_128_SSURef_tax_silva_full_align_trunc.fasta.gz	Bacteria;Firmicutes;Bacilli;Lactobacillales;Streptococcaceae;Streptococcus
SILVA_132_SSURef_tax_silva.fasta.gz	Bacteria;Firmicutes;Bacilli;Lactobacillales;Streptococcaceae;Streptococcus
SILVA_132_SSURef_tax_silva_full_align_trunc.fasta.gz	Bacteria;Firmicutes;Bacilli;Lactobacillales;Streptococcaceae;Streptococcus
bac_ssu_r86.1_20180911.fna.gz	Bacteria;Firmicutes;Bacilli;Lactobacillales;Streptococcaceae;Streptococcus
29	TACGTAGGTCCCGAGCGNTGTCCGGATTTATTGGGCGTAAAGGGAGCGCAGGCGGTCAGGAAAGTCTGGA_CCTGTTCGCTACCCACGCTTTCGAGCCTCAGCGTCAGTGACAGACCAGAGAGCCGCTTTCGCCACTGGTG
SILVA_123_SSURef_tax_silva.fasta.gz	Bacteria;Firmicutes;Bacilli;Lactobacillales;Streptococcaceae;Streptococcus
SILVA_123_SSURef_tax_silva_full_align_trunc.fasta.gz	Bacteria;Firmicutes;Bacilli;Lactobacillales;Streptococcaceae;Streptococcus
SILVA_128_SSURef_tax_silva.fasta.gz	Bacteria;Firmicutes;Bacilli;Lactobacillales;Streptococcaceae;Streptococcus
SILVA_128_SSURef_tax_silva_full_align_trunc.fasta.gz	Bacteria;Firmicutes;Bacilli;Lactobacillales;Streptococcaceae;Streptococcus
SILVA_132_SSURef_tax_silva.fasta.gz	Bacteria;Firmicutes;Bacilli;Lactobacillales;Streptococcaceae;Streptococcus
SILVA_132_SSURef_tax_silva_full_align_trunc.fasta.gz	Bacteria;Firmicutes;Bacilli;Lactobacillales;Streptococcaceae;Streptococcus
bac_ssu_r86.1_20180911.fna.gz	Bacteria;Firmicutes;Bacilli;Lactobacillales;Streptococcaceae;Streptococcus
30	TACGTAGGTCCCGAGCGNTGTCCGGATTTATTGGGCGTAAAGCGAGCGCAGGCGGTTCTTTAAGTCTGAA_CCTGTTTGCTCCCCACGCTTTCGAGCCTCAGCGTCAGTTACAGACCAGAGAGCCGCTTTCGCCACCGGTG
SILVA_123_SSURef_tax_silva.fasta.gz	Bacteria;Firmicutes;Bacilli;Lactobacillales;Streptococcaceae;Streptococcus
SILVA_123_SSURef_tax_silva_full_align_trunc.fasta.gz	Bacteria;Firmicutes;Bacilli;Lactobacillales;Streptococcaceae;Streptococcus
SILVA_128_SSURef_tax_silva.fasta.gz	Bacteria;Firmicutes;Bacilli;Lactobacillales;Streptococcaceae;Streptococcus
SILVA_128_SSURef_tax_silva_full_align_trunc.fasta.gz	Bacteria;Firmicutes;Bacilli;Lactobacillales;Streptococcaceae;Streptococcus
SILVA_132_SSURef_tax_silva.fasta.gz	Bacteria;Firmicutes;Bacilli;Lactobacillales;Streptococcaceae;Streptococcus
SILVA_132_SSURef_tax_silva_full_align_trunc.fasta.gz	Bacteria;Firmicutes;Bacilli;Lactobacillales;Streptococcaceae;Streptococcus
bac_ssu_r86.1_20180911.fna.gz	Bacteria;Firmicutes;Bacilli;Lactobacillales;Streptococcaceae;Streptococcus
31	TACGTAGGGCGCGAGCGTTGTCCGGAATTATTGGGCGTAAAGGGCTTGTAGGCGGTTGGTCGCGTCTGCC_CCTGTTCGCTCCCCACGCTTTCGCTCCTCAGCGTCAGTAACGGCCCAGAGACCCGCCTTCGCCACCGGTG
SILVA_123_SSURef_tax_silva.fasta.gz	Bacteria;Actinobacteria;Actinobacteria;Actinomycetales;Actinomycetaceae;Actinomyces
SILVA_123_SSURef_tax_silva_full_align_trunc.fasta.gz	Bacteria;Actinobacteria;Actinobacteria;Actinomycetales;Actinomycetaceae;Actinomyces
SILVA_128_SSURef_tax_silva.fasta.gz	Bacteria;Actinobacteria;Actinobacteria;Actinomycetales;Actinomycetaceae;Actinomyces
SILVA_128_SSURef_tax_silva_full_align_trunc.fasta.gz	Bacteria;Actinobacteria;Actinobacteria;Actinomycetales;Actinomycetaceae;Actinomyces
SILVA_132_SSURef_tax_silva.fasta.gz	Bacteria;Actinobacteria;Actinobacteria;Actinomycetales;Actinomycetaceae;Actinomyces
SILVA_132_SSURef_tax_silva_full_align_trunc.fasta.gz	Bacteria;Actinobacteria;Actinobacteria;Actinomycetales;Actinomycetaceae;Actinomyces
bac_ssu_r86.1_20180911.fna.gz	Bacteria;Actinobacteriota;Actinobacteria;Actinomycetales;Actinomycetaceae;Actinomyces_B
32	TACGGAGGGTGCAAGCGTTAATCGGAATTACTGGGCGTAAAGCGCACGCAGGCGGTTTGTTAAGTCAGAT_TTTAACCTTGCGGCCGTACTCCCCAGGCGGTCGACTTAACGCGTTAGCTCCGGAAGCCACGCCTCAAGGG
SILVA_123_SSURef_tax_silva.fasta.gz	Bacteria;Proteobacteria;Gammaproteobacteria;Enterobacteriales
SILVA_123_SSURef_tax_silva.fasta.gz
SILVA_128_SSURef_tax_silva.fasta.gz	Bacteria;Proteobacteria;Gammaproteobacteria;Enterobacteriales
SILVA_128_SSURef_tax_silva.fasta.gz
SILVA_132_SSURef_tax_silva.fasta.gz	Bacteria;Proteobacteria;Gammaproteobacteria;Enterobacteriales
SILVA_132_SSURef_tax_silva.fasta.gz
SILVA_132_SSURef_tax_silva.fasta.gz
33	TACGGAGGATCCGAGCGNTATCCGGATTTATTGGGTTTAAAGGGAGCGTAGATGGATGTTTAAGTCAGTT_CCTGTTTGATACCCACACTTTCGAGCCTCAATGTCAGTTGCAGCTTAGCAGGCTGCCTTCGCAATCGGAG
SILVA_123_SSURef_tax_silva.fasta.gz	Bacteria;Bacteroidetes;Bacteroidia;Bacteroidales;Bacteroidaceae;Bacteroides
SILVA_123_SSURef_tax_silva_full_align_trunc.fasta.gz	Bacteria;Bacteroidetes;Bacteroidia;Bacteroidales;Bacteroidaceae;Bacteroides
SILVA_128_SSURef_tax_silva.fasta.gz	Bacteria;Bacteroidetes;Bacteroidia;Bacteroidales;Bacteroidaceae;Bacteroides
SILVA_128_SSURef_tax_silva_full_align_trunc.fasta.gz	Bacteria;Bacteroidetes;Bacteroidia;Bacteroidales;Bacteroidaceae;Bacteroides
SILVA_132_SSURef_tax_silva.fasta.gz	Bacteria;Bacteroidetes;Bacteroidia;Bacteroidales;Bacteroidaceae;Bacteroides
SILVA_132_SSURef_tax_silva_full_align_trunc.fasta.gz	Bacteria;Bacteroidetes;Bacteroidia;Bacteroidales;Bacteroidaceae;Bacteroides
bac_ssu_r86.1_20180911.fna.gz	Bacteria;Bacteroidota
34	TACGTAGGTGGCAAGCGTTATCCGGAATTATTGGGCGTAAAGCGCGCGTAGGCGGTTTTTTAAGTCTGAT_CCTGTTTGATCCCCACGCTTTCGCACATCAGCGTCAGTTACAGACCAGAAAGTCGCCTTCGCCCCTGGTG
SILVA_123_SSURef_tax_silva.fasta.gz	Bacteria;Firmicutes;Bacilli;Bacillales;Staphylococcaceae;Staphylococcus
SILVA_123_SSURef_tax_silva_full_align_trunc.fasta.gz	Bacteria;Firmicutes;Bacilli;Bacillales;Staphylococcaceae;Staphylococcus
SILVA_128_SSURef_tax_silva.fasta.gz	Bacteria;Firmicutes;Bacilli;Bacillales;Staphylococcaceae;Staphylococcus
SILVA_128_SSURef_tax_silva_full_align_trunc.fasta.gz	Bacteria;Firmicutes;Bacilli;Bacillales;Staphylococcaceae;Staphylococcus
SILVA_132_SSURef_tax_silva.fasta.gz	Bacteria;Firmicutes;Bacilli;Bacillales;Staphylococcaceae;Staphylococcus
SILVA_132_SSURef_tax_silva_full_align_trunc.fasta.gz	Bacteria;Firmicutes;Bacilli;Bacillales;Staphylococcaceae;Staphylococcus
bac_ssu_r86.1_20180911.fna.gz	Bacteria;Firmicutes;Bacilli;Staphylococcales;Staphylococcaceae;Staphylococcus
35	TACGTAGGTGGCAAGCGNTATCCGGAATTATTGGGCGTAAAGCGCGCGTAGGCGGTTTTTTAAGTCTGAT_CCTGTTTGATCCCCACGCTTTCGCACATCAGCGTCAGTTACAGACCAGAAAGTCGCCTTCGCCACTGGTG
SILVA_123_SSURef_tax_silva.fasta.gz	Bacteria;Firmicutes;Bacilli;Bacillales;Staphylococcaceae;Staphylococcus
SILVA_123_SSURef_tax_silva_full_align_trunc.fasta.gz	Bacteria;Firmicutes;Bacilli;Bacillales;Staphylococcaceae;Staphylococcus
SILVA_128_SSURef_tax_silva.fasta.gz	Bacteria;Firmicutes;Bacilli;Bacillales;Staphylococcaceae;Staphylococcus
SILVA_128_SSURef_tax_silva_full_align_trunc.fasta.gz	Bacteria;Firmicutes;Bacilli;Bacillales;Staphylococcaceae;Staphylococcus
SILVA_132_SSURef_tax_silva.fasta.gz	Bacteria;Firmicutes;Bacilli;Bacillales;Staphylococcaceae;Staphylococcus
SILVA_132_SSURef_tax_silva_full_align_trunc.fasta.gz	Bacteria;Firmicutes;Bacilli;Bacillales;Staphylococcaceae;Staphylococcus
bac_ssu_r86.1_20180911.fna.gz	Bacteria;Firmicutes;Bacilli;Staphylococcales;Staphylococcaceae;Staphylococcus
36	TACGTAGGGTGCGAGCGNTAATCGGAATTACTGGGCGTAAAGCGGGCGCAGACGGTTACTTAAGCAGGAT_CCTGTTTGCTACCCACGCTTTCGGGCATGAACGTCAGTGTTGTCCCAGGAGGCTGCCTTCGCCATCGGTA
SILVA_123_SSURef_tax_silva.fasta.gz	Bacteria;Proteobacteria;Betaproteobacteria;Neisseriales;Neisseriaceae;Neisseria
SILVA_123_SSURef_tax_silva_full_align_trunc.fasta.gz	Bacteria;Proteobacteria;Betaproteobacteria;Neisseriales;Neisseriaceae;Neisseria
SILVA_128_SSURef_tax_silva.fasta.gz	Bacteria;Proteobacteria;Betaproteobacteria;Neisseriales;Neisseriaceae;Neisseria
SILVA_128_SSURef_tax_silva_full_align_trunc.fasta.gz	Bacteria;Proteobacteria;Betaproteobacteria;Neisseriales;Neisseriaceae;Neisseria
SILVA_132_SSURef_tax_silva.fasta.gz	Bacteria;Proteobacteria;Gammaproteobacteria;Betaproteobacteriales;Neisseriaceae;Neisseria
SILVA_132_SSURef_tax_silva_full_align_trunc.fasta.gz	Bacteria;Proteobacteria;Gammaproteobacteria;Betaproteobacteriales;Neisseriaceae;Neisseria
bac_ssu_r86.1_20180911.fna.gz	Bacteria;Proteobacteria;Gammaproteobacteria;Betaproteobacteriales;Neisseriaceae;Neisseria
37	TACGTAGGTGGCAAGCGTTATCCGGAATTATTGGGCGTAAAGCGCGCGTAGGCGGTTTTTTAAGTCTGAT_CCTGTTTGATCCCCACGCTTTCGCACATCAGCGTCAGTTACAGACCAGAAAGTCGCCTTCGCCACTGGTG
SILVA_123_SSURef_tax_silva.fasta.gz	Bacteria;Firmicutes;Bacilli;Bacillales;Staphylococcaceae;Staphylococcus
SILVA_123_SSURef_tax_silva_full_align_trunc.fasta.gz	Bacteria;Firmicutes;Bacilli;Bacillales;Staphylococcaceae;Staphylococcus
SILVA_128_SSURef_tax_silva.fasta.gz	Bacteria;Firmicutes;Bacilli;Bacillales;Staphylococcaceae;Staphylococcus
SILVA_128_SSURef_tax_silva_full_align_trunc.fasta.gz	Bacteria;Firmicutes;Bacilli;Bacillales;Staphylococcaceae;Staphylococcus
SILVA_132_SSURef_tax_silva.fasta.gz	Bacteria;Firmicutes;Bacilli;Bacillales;Staphylococcaceae;Staphylococcus
SILVA_132_SSURef_tax_silva_full_align_trunc.fasta.gz	Bacteria;Firmicutes;Bacilli;Bacillales;Staphylococcaceae;Staphylococcus
bac_ssu_r86.1_20180911.fna.gz	Bacteria;Firmicutes;Bacilli;Staphylococcales;Staphylococcaceae;Staphylococcus
38	TACGGAGGGTGCAAGCGTTACTCGGAATCACTGGGCGTAAAGAGCGCGTAGGCGGGATAGTCAGTCAGGT_CCTGTTTGCTCCCCACGCTTTCGCGCAATCAGCGTCAGTAATGTTCCAGCAGGTCGCCTTCGCAATGAGT
SILVA_123_SSURef_tax_silva.fasta.gz	Bacteria;Proteobacteria;Epsilonproteobacteria;Campylobacterales;Helicobacteraceae;Helicobacter
SILVA_123_SSURef_tax_silva_full_align_trunc.fasta.gz	Bacteria;Proteobacteria;Epsilonproteobacteria;Campylobacterales;Helicobacteraceae;Helicobacter
SILVA_128_SSURef_tax_silva.fasta.gz	Bacteria;Proteobacteria;Epsilonproteobacteria;Campylobacterales;Helicobacteraceae;Helicobacter
SILVA_128_SSURef_tax_silva_full_align_trunc.fasta.gz	Bacteria;Proteobacteria;Epsilonproteobacteria;Campylobacterales;Helicobacteraceae;Helicobacter
SILVA_132_SSURef_tax_silva.fasta.gz	Bacteria;Epsilonbacteraeota;Campylobacteria;Campylobacterales;Helicobacteraceae;Helicobacter
SILVA_132_SSURef_tax_silva_full_align_trunc.fasta.gz	Bacteria;Epsilonbacteraeota;Campylobacteria;Campylobacterales;Helicobacteraceae;Helicobacter
bac_ssu_r86.1_20180911.fna.gz	Bacteria;Campylobacterota;Campylobacteria;Campylobacterales;Helicobacteraceae;Helicobacter
39	TACGGAGGGTGCAAGCGNTAATCGGAATTACTGGGCGTAAAGCGCACGCAGGCGGTTTGTTAAGTCAGAT_CCTGTTTGCTCCCCACGCTTTCGCACCTGAGCGTCAGTCTTCGTCCAGGGGGCCGCCTTCGCCACCGGTA
SILVA_123_SSURef_tax_silva.fasta.gz	Bacteria;Proteobacteria;Gammaproteobacteria;Enterobacteriales;Enterobacteriaceae
SILVA_123_SSURef_tax_silva_full_align_trunc.fasta.gz	Bacteria;Proteobacteria;Gammaproteobacteria;Enterobacteriales;Enterobacteriaceae
SILVA_128_SSURef_tax_silva.fasta.gz	Bacteria;Proteobacteria;Gammaproteobacteria;Enterobacteriales;Enterobacteriaceae
SILVA_128_SSURef_tax_silva_full_align_trunc.fasta.gz	Bacteria;Proteobacteria;Gammaproteobacteria;Enterobacteriales;Enterobacteriaceae
SILVA_132_SSURef_tax_silva.fasta.gz	Bacteria;Proteobacteria;Gammaproteobacteria;Enterobacteriales;Enterobacteriaceae
SILVA_132_SSURef_tax_silva_full_align_trunc.fasta.gz	Bacteria;Proteobacteria;Gammaproteobacteria;Enterobacteriales;Enterobacteriaceae
bac_ssu_r86.1_20180911.fna.gz	Bacteria;Proteobacteria;Gammaproteobacteria;Enterobacterales;Enterobacteriaceae
40	TACGTAGGTGGCAAGCGTTGTCCGGATTTATTGGGCGTAAAGCGCGCGCAGGCGGTCTTTTAAGTCTGAT_CCTGTTTGCTCCCCACGCTTTCGCGCCTCAGCGTCAGTTACAGACCAGAGAGTCGCCTTCGCCACTGGTG
SILVA_123_SSURef_tax_silva.fasta.gz	Bacteria;Firmicutes;Bacilli;Bacillales;Listeriaceae;Listeria
SILVA_123_SSURef_tax_silva_full_align_trunc.fasta.gz	Bacteria;Firmicutes;Bacilli;Bacillales;Listeriaceae;Listeria
SILVA_128_SSURef_tax_silva.fasta.gz	Bacteria;Firmicutes;Bacilli;Bacillales;Listeriaceae;Listeria
SILVA_128_SSURef_tax_silva_full_align_trunc.fasta.gz	Bacteria;Firmicutes;Bacilli;Bacillales;Listeriaceae;Listeria
SILVA_132_SSURef_tax_silva.fasta.gz	Bacteria;Firmicutes;Bacilli;Bacillales;Listeriaceae;Listeria
SILVA_132_SSURef_tax_silva_full_align_trunc.fasta.gz	Bacteria;Firmicutes;Bacilli;Bacillales;Listeriaceae;Listeria
bac_ssu_r86.1_20180911.fna.gz	Bacteria;Firmicutes;Bacilli;Lactobacillales;Listeriaceae;Listeria
41	TACGTAGGTCCCGAGCGTTGTCCGGATTTATTGGGCGTAAAGCGAGCGCAGGCGGTTAGATAAGTCTGAA_CCTGTTTGCTCCCCACGCTTTCGAGCCTCAGCGTCAGTTACAAGCCAGAGAGCCGCTTTCGCCACCGGTG
SILVA_123_SSURef_tax_silva.fasta.gz	Bacteria;Firmicutes;Bacilli;Lactobacillales;Streptococcaceae;Streptococcus
SILVA_123_SSURef_tax_silva_full_align_trunc.fasta.gz	Bacteria;Firmicutes;Bacilli;Lactobacillales;Streptococcaceae;Streptococcus
SILVA_128_SSURef_tax_silva.fasta.gz	Bacteria;Firmicutes;Bacilli;Lactobacillales;Streptococcaceae;Streptococcus
SILVA_128_SSURef_tax_silva_full_align_trunc.fasta.gz	Bacteria;Firmicutes;Bacilli;Lactobacillales;Streptococcaceae;Streptococcus
SILVA_132_SSURef_tax_silva.fasta.gz	Bacteria;Firmicutes;Bacilli;Lactobacillales;Streptococcaceae;Streptococcus
SILVA_132_SSURef_tax_silva_full_align_trunc.fasta.gz	Bacteria;Firmicutes;Bacilli;Lactobacillales;Streptococcaceae;Streptococcus
bac_ssu_r86.1_20180911.fna.gz	Bacteria;Firmicutes;Bacilli;Lactobacillales;Streptococcaceae;Streptococcus
42	TACGTAGGGCGCGAGCGTTGTCCGGAATTATTGGGCGTAAAGGGCTTGTAGGCGGTTGGTCGCGTCTGCC_CCTGTTCGCTCCCCACGCTTTCGCTCCTCAGCGTCAGTAACGGCCCAGAGACCCGCCTTCGCTACCGGTG
SILVA_123_SSURef_tax_silva.fasta.gz	Bacteria;Actinobacteria;Actinobacteria;Actinomycetales;Actinomycetaceae;Actinomyces
SILVA_123_SSURef_tax_silva_full_align_trunc.fasta.gz	Bacteria;Actinobacteria;Actinobacteria;Actinomycetales;Actinomycetaceae;Actinomyces
SILVA_128_SSURef_tax_silva.fasta.gz	Bacteria;Actinobacteria;Actinobacteria;Actinomycetales;Actinomycetaceae;Actinomyces
SILVA_128_SSURef_tax_silva_full_align_trunc.fasta.gz	Bacteria;Actinobacteria;Actinobacteria;Actinomycetales;Actinomycetaceae;Actinomyces
SILVA_132_SSURef_tax_silva.fasta.gz	Bacteria;Actinobacteria;Actinobacteria;Actinomycetales;Actinomycetaceae;Actinomyces
SILVA_132_SSURef_tax_silva_full_align_trunc.fasta.gz	Bacteria;Actinobacteria;Actinobacteria;Actinomycetales;Actinomycetaceae;Actinomyces
bac_ssu_r86.1_20180911.fna.gz	Bacteria;Actinobacteriota;Actinobacteria;Actinomycetales;Actinomycetaceae;Actinomyces_B
43	TACGGAGGATCCGAGCGTTATCCGGATTTATTGGGTTTAAAGGGAGCGTAGATGGATATTTAAGTCAGTT_CCTGTTTGATACCCACACTTTCGAGCCTCAATGTCAGTTGCAGCTTAGCAGGCTGCCTTCGCAATCGGAG
SILVA_123_SSURef_tax_silva.fasta.gz	Bacteria;Bacteroidetes;Bacteroidia;Bacteroidales;Bacteroidaceae;Bacteroides
SILVA_123_SSURef_tax_silva_full_align_trunc.fasta.gz	Bacteria;Bacteroidetes;Bacteroidia;Bacteroidales;Bacteroidaceae;Bacteroides
SILVA_128_SSURef_tax_silva.fasta.gz	Bacteria;Bacteroidetes;Bacteroidia;Bacteroidales;Bacteroidaceae;Bacteroides
SILVA_128_SSURef_tax_silva_full_align_trunc.fasta.gz	Bacteria;Bacteroidetes;Bacteroidia;Bacteroidales;Bacteroidaceae;Bacteroides
SILVA_132_SSURef_tax_silva.fasta.gz	Bacteria;Bacteroidetes;Bacteroidia;Bacteroidales;Bacteroidaceae;Bacteroides
SILVA_132_SSURef_tax_silva_full_align_trunc.fasta.gz	Bacteria;Bacteroidetes;Bacteroidia;Bacteroidales;Bacteroidaceae;Bacteroides
bac_ssu_r86.1_20180911.fna.gz	Bacteria;Bacteroidota
44	TACGTAGGTCCCGAGCGTTGTCCGGATTTATTGGGCGTAAAGCGAGCGCAGGCGGTTCTTTAAGTCTGAA_CCTGTTTGCTCCCCACGCTTTCGAGCCTCAGCGTCAGTTACAGACCAGAGAGCCGCTTTCGCTACCGGTG
SILVA_123_SSURef_tax_silva.fasta.gz	Bacteria;Firmicutes;Bacilli;Lactobacillales;Streptococcaceae;Streptococcus
SILVA_123_SSURef_tax_silva_full_align_trunc.fasta.gz	Bacteria;Firmicutes;Bacilli;Lactobacillales;Streptococcaceae;Streptococcus
SILVA_128_SSURef_tax_silva.fasta.gz	Bacteria;Firmicutes;Bacilli;Lactobacillales;Streptococcaceae;Streptococcus
SILVA_128_SSURef_tax_silva_full_align_trunc.fasta.gz	Bacteria;Firmicutes;Bacilli;Lactobacillales;Streptococcaceae;Streptococcus
SILVA_132_SSURef_tax_silva.fasta.gz	Bacteria;Firmicutes;Bacilli;Lactobacillales;Streptococcaceae;Streptococcus
SILVA_132_SSURef_tax_silva_full_align_trunc.fasta.gz	Bacteria;Firmicutes;Bacilli;Lactobacillales;Streptococcaceae;Streptococcus
bac_ssu_r86.1_20180911.fna.gz	Bacteria;Firmicutes;Bacilli;Lactobacillales;Streptococcaceae;Streptococcus
45	TACGTAGGGTGCGAGCGTTAATCGGAATTACTGGGCGTAAAGCGGGCGCAGACGGTTACTTAAGCAGGAT_CCTGTTTGCTACCCACGCTTTCGGGCATGAACGTCAGTGTTGTCCCAGGAGGCTGCCTTCGCTATCGGTA
SILVA_123_SSURef_tax_silva.fasta.gz	Bacteria;Proteobacteria;Betaproteobacteria;Neisseriales;Neisseriaceae;Neisseria
SILVA_123_SSURef_tax_silva_full_align_trunc.fasta.gz	Bacteria;Proteobacteria;Betaproteobacteria;Neisseriales;Neisseriaceae;Neisseria
SILVA_128_SSURef_tax_silva.fasta.gz	Bacteria;Proteobacteria;Betaproteobacteria;Neisseriales;Neisseriaceae;Neisseria
SILVA_128_SSURef_tax_silva_full_align_trunc.fasta.gz	Bacteria;Proteobacteria;Betaproteobacteria;Neisseriales;Neisseriaceae;Neisseria
SILVA_132_SSURef_tax_silva.fasta.gz	Bacteria;Proteobacteria;Gammaproteobacteria;Betaproteobacteriales;Neisseriaceae;Neisseria
SILVA_132_SSURef_tax_silva_full_align_trunc.fasta.gz	Bacteria;Proteobacteria;Gammaproteobacteria;Betaproteobacteriales;Neisseriaceae;Neisseria
bac_ssu_r86.1_20180911.fna.gz	Bacteria;Proteobacteria;Gammaproteobacteria;Betaproteobacteriales;Neisseriaceae;Neisseria
46	TACGTAGGTGGCAAGCGTTGTCCGGATTTATTGGGCGTAAAGCGAGCGCAGGCGGTTTCTTAAGTCTGAT_CCTGTTTGCTCCCCACGCTTTCGAGCCTCAGCGTCAGTTACAGACCAGAGAGCCGCCTTCGCTACTGGTG
SILVA_123_SSURef_tax_silva.fasta.gz	Bacteria;Firmicutes;Bacilli;Lactobacillales;Enterococcaceae;Enterococcus
SILVA_123_SSURef_tax_silva_full_align_trunc.fasta.gz	Bacteria;Firmicutes;Bacilli;Lactobacillales;Enterococcaceae;Enterococcus
SILVA_128_SSURef_tax_silva.fasta.gz	Bacteria;Firmicutes;Bacilli;Lactobacillales;Enterococcaceae;Enterococcus
SILVA_128_SSURef_tax_silva_full_align_trunc.fasta.gz	Bacteria;Firmicutes;Bacilli;Lactobacillales;Enterococcaceae;Enterococcus
SILVA_132_SSURef_tax_silva.fasta.gz	Bacteria;Firmicutes;Bacilli;Lactobacillales;Enterococcaceae;Enterococcus
SILVA_132_SSURef_tax_silva_full_align_trunc.fasta.gz	Bacteria;Firmicutes;Bacilli;Lactobacillales;Enterococcaceae;Enterococcus
bac_ssu_r86.1_20180911.fna.gz	Bacteria;Firmicutes;Bacilli;Lactobacillales;Enterococcaceae
47	TACGAAGGGTGCAAGCGNTAATCGGAATTACTGGGCGTAAAGCGCGCGTAGGTGGTTCAGCAAGTTGGAT_CCTGTTTGCTCCCCACGCTTTCGCACCTCAGTGTCAGTATCAGTCCAGGTGGTCGCCTTCGCCACTGGTG
SILVA_123_SSURef_tax_silva.fasta.gz	Bacteria;Proteobacteria;Gammaproteobacteria;Pseudomonadales;Pseudomonadaceae;Pseudomonas
SILVA_123_SSURef_tax_silva_full_align_trunc.fasta.gz	Bacteria;Proteobacteria;Gammaproteobacteria;Pseudomonadales;Pseudomonadaceae;Pseudomonas
SILVA_128_SSURef_tax_silva.fasta.gz	Bacteria;Proteobacteria;Gammaproteobacteria;Pseudomonadales;Pseudomonadaceae;Pseudomonas
SILVA_128_SSURef_tax_silva_full_align_trunc.fasta.gz	Bacteria;Proteobacteria;Gammaproteobacteria;Pseudomonadales;Pseudomonadaceae;Pseudomonas
SILVA_132_SSURef_tax_silva.fasta.gz	Bacteria;Proteobacteria;Gammaproteobacteria;Pseudomonadales;Pseudomonadaceae;Pseudomonas
SILVA_132_SSURef_tax_silva_full_align_trunc.fasta.gz	Bacteria;Proteobacteria;Gammaproteobacteria;Pseudomonadales;Pseudomonadaceae;Pseudomonas
bac_ssu_r86.1_20180911.fna.gz	Bacteria;Proteobacteria;Gammaproteobacteria;Pseudomonadales;Pseudomonadaceae
48	TACGGAAGGTCCGGGCGTTATCCGGATTTATTGGGTTTAAAGGGAGCGTAGGCCGGAGATTAAGCGTGTT_CCTGTTCGATACCCGCACTTTCGAGCTTCAGCGTCAGTTGCGCTCCAGTGAGCTGCCTTCGCAATCGGAG
SILVA_123_SSURef_tax_silva.fasta.gz	Bacteria;Bacteroidetes;Bacteroidia;Bacteroidales;Prevotellaceae;Prevotella_9
SILVA_123_SSURef_tax_silva_full_align_trunc.fasta.gz	Bacteria;Bacteroidetes;Bacteroidia;Bacteroidales;Prevotellaceae;Prevotella_9
SILVA_128_SSURef_tax_silva.fasta.gz	Bacteria;Bacteroidetes;Bacteroidia;Bacteroidales;Prevotellaceae;Prevotella_9
SILVA_128_SSURef_tax_silva_full_align_trunc.fasta.gz	Bacteria;Bacteroidetes;Bacteroidia;Bacteroidales;Prevotellaceae;Prevotella_9
SILVA_132_SSURef_tax_silva.fasta.gz	Bacteria;Bacteroidetes;Bacteroidia;Bacteroidales;Prevotellaceae;Prevotella_9
SILVA_132_SSURef_tax_silva_full_align_trunc.fasta.gz	Bacteria;Bacteroidetes;Bacteroidia;Bacteroidales;Prevotellaceae;Prevotella_9
bac_ssu_r86.1_20180911.fna.gz	Bacteria;Bacteroidota;Bacteroidia;Bacteroidales;Bacteroidaceae;Prevotella
49	TACGGAGGGTGCAAGCGTTACCCGGAATCACTGGGCGTAAAGGGCGTGTAGGCGGAAATTTAAGTCTGGT_CCGGTTTGCTCCCCACACTTTCGCGCCTCAGCGTCACCTTCTGTCCAGTAACTTGCCTTCGCTATTGGTG
SILVA_123_SSURef_tax_silva.fasta.gz	Bacteria;Deinococcus-Thermus;Deinococci;Deinococcales;Deinococcaceae;Deinococcus
SILVA_123_SSURef_tax_silva_full_align_trunc.fasta.gz	Bacteria;Deinococcus-Thermus;Deinococci;Deinococcales;Deinococcaceae;Deinococcus
SILVA_128_SSURef_tax_silva.fasta.gz	Bacteria;Deinococcus-Thermus;Deinococci;Deinococcales;Deinococcaceae;Deinococcus
SILVA_128_SSURef_tax_silva_full_align_trunc.fasta.gz	Bacteria;Deinococcus-Thermus;Deinococci;Deinococcales;Deinococcaceae;Deinococcus
SILVA_132_SSURef_tax_silva.fasta.gz	Bacteria;Deinococcus-Thermus;Deinococci;Deinococcales;Deinococcaceae;Deinococcus
SILVA_132_SSURef_tax_silva_full_align_trunc.fasta.gz	Bacteria;Deinococcus-Thermus;Deinococci;Deinococcales;Deinococcaceae;Deinococcus
bac_ssu_r86.1_20180911.fna.gz	Bacteria;Deinococcota;Deinococci;Deinococcales;Deinococcaceae;Deinococcus
50	TACGTAGGTGGCAAGCGTTGTCCGGATTTATTGGGCGTAAAGCGAGCGCAGGCGGTTTCTTAAGTCTGAT_CCTGTTTGCTCCCCACGCTTTCGAGCCTCAGCGTCAGTTACAGACCAGAGAGCCGCCTTCGCCACTGGTG
SILVA_123_SSURef_tax_silva.fasta.gz	Bacteria;Firmicutes;Bacilli;Lactobacillales;Enterococcaceae;Enterococcus
SILVA_123_SSURef_tax_silva_full_align_trunc.fasta.gz	Bacteria;Firmicutes;Bacilli;Lactobacillales;Enterococcaceae;Enterococcus
SILVA_128_SSURef_tax_silva.fasta.gz	Bacteria;Firmicutes;Bacilli;Lactobacillales;Enterococcaceae;Enterococcus
SILVA_128_SSURef_tax_silva_full_align_trunc.fasta.gz	Bacteria;Firmicutes;Bacilli;Lactobacillales;Enterococcaceae;Enterococcus
SILVA_132_SSURef_tax_silva.fasta.gz	Bacteria;Firmicutes;Bacilli;Lactobacillales;Enterococcaceae;Enterococcus
SILVA_132_SSURef_tax_silva_full_align_trunc.fasta.gz	Bacteria;Firmicutes;Bacilli;Lactobacillales;Enterococcaceae;Enterococcus
bac_ssu_r86.1_20180911.fna.gz	Bacteria;Firmicutes;Bacilli;Lactobacillales;Enterococcaceae
51	TACGTAGGTGGCAAGCGTTATCCGGAATTATTGGGCGTAAAGCGCGCGCAGGTGGTTTCTTAAGTCTGAT_CCTGTTTGCTCCCCACGCTTTCGCGCCTCAGTGTCAGTTACAGACCAGAAAGTCGCCTTCGCCACTGGTG
SILVA_123_SSURef_tax_silva.fasta.gz	Bacteria;Firmicutes;Bacilli;Bacillales;Bacillaceae;Bacillus
SILVA_123_SSURef_tax_silva_full_align_trunc.fasta.gz	Bacteria;Firmicutes;Bacilli;Bacillales;Bacillaceae;Bacillus
SILVA_128_SSURef_tax_silva.fasta.gz	Bacteria;Firmicutes;Bacilli;Bacillales;Bacillaceae;Bacillus
SILVA_128_SSURef_tax_silva_full_align_trunc.fasta.gz	Bacteria;Firmicutes;Bacilli;Bacillales;Bacillaceae;Bacillus
SILVA_132_SSURef_tax_silva.fasta.gz	Bacteria;Firmicutes;Bacilli;Bacillales;Bacillaceae;Bacillus
SILVA_132_SSURef_tax_silva_full_align_trunc.fasta.gz	Bacteria;Firmicutes;Bacilli;Bacillales;Bacillaceae;Bacillus
bac_ssu_r86.1_20180911.fna.gz	Bacteria;Firmicutes;Bacilli;Bacillales;Bacillaceae_G;Bacillus_A
52	TACGTAGGTGGCAAGCGNTGTCCGGATTTACTGGGCGTAAAGGGAGCGTAGGTGGATATTTAAGTGGGAT_CCTGTTTGCTCCCCACGCTTTCGAGCCTCAGTGTCAGTTACAGTCCAGAAAGTCGCCTTCGCCACTGGTA
SILVA_123_SSURef_tax_silva.fasta.gz	Bacteria;Firmicutes;Clostridia;Clostridiales;Clostridiaceae_1;Clostridium_sensu_stricto_1
SILVA_123_SSURef_tax_silva_full_align_trunc.fasta.gz	Bacteria;Firmicutes;Clostridia;Clostridiales;Clostridiaceae_1;Clostridium_sensu_stricto_1
SILVA_128_SSURef_tax_silva.fasta.gz	Bacteria;Firmicutes;Clostridia;Clostridiales;Clostridiaceae_1;Clostridium_sensu_stricto_1
SILVA_128_SSURef_tax_silva_full_align_trunc.fasta.gz	Bacteria;Firmicutes;Clostridia;Clostridiales;Clostridiaceae_1;Clostridium_sensu_stricto_1
SILVA_132_SSURef_tax_silva.fasta.gz	Bacteria;Firmicutes;Clostridia;Clostridiales;Clostridiaceae_1;Clostridium_sensu_stricto_1
SILVA_132_SSURef_tax_silva_full_align_trunc.fasta.gz	Bacteria;Firmicutes;Clostridia;Clostridiales;Clostridiaceae_1;Clostridium_sensu_stricto_1
bac_ssu_r86.1_20180911.fna.gz	Bacteria;Firmicutes_A;Clostridia;Clostridiales;Clostridiaceae;Clostridium
53	TACGTAGGTCCCGAGCGTTGTCCGGATTTATTGGGCGTAAAGCGAGCGCAGGCGGTTCTTTTAGTCTGAA_CCTGTTTGCTCCCCACGCTTTCGAGCCTCAGCGTCAGTTACAGACCAGAGAGCCGCTTTCGCCACCGGTG
SILVA_123_SSURef_tax_silva.fasta.gz	Bacteria;Firmicutes;Bacilli;Lactobacillales;Streptococcaceae;Streptococcus
SILVA_123_SSURef_tax_silva_full_align_trunc.fasta.gz	Bacteria;Firmicutes;Bacilli;Lactobacillales;Streptococcaceae;Streptococcus
SILVA_128_SSURef_tax_silva.fasta.gz	Bacteria;Firmicutes;Bacilli;Lactobacillales;Streptococcaceae;Streptococcus
SILVA_128_SSURef_tax_silva_full_align_trunc.fasta.gz	Bacteria;Firmicutes;Bacilli;Lactobacillales;Streptococcaceae;Streptococcus
SILVA_132_SSURef_tax_silva.fasta.gz	Bacteria;Firmicutes;Bacilli;Lactobacillales;Streptococcaceae;Streptococcus
SILVA_132_SSURef_tax_silva_full_align_trunc.fasta.gz	Bacteria;Firmicutes;Bacilli;Lactobacillales;Streptococcaceae;Streptococcus
bac_ssu_r86.1_20180911.fna.gz	Bacteria;Firmicutes;Bacilli;Lactobacillales;Streptococcaceae;Streptococcus
54	TACGTAGGTGGCAAGCGTTGTCCGGATTTACTGGGCGTAAAGGGAGCGTAGGTGGATATTTAAGTGGGAT_CCTGTTTGCTCCCCACGCTTTCGAGCCTCAGTGTCAGTTACAGTCCAGAAAGTCGCCTTCGCCACTGGTA
SILVA_123_SSURef_tax_silva.fasta.gz	Bacteria;Firmicutes;Clostridia;Clostridiales;Clostridiaceae_1;Clostridium_sensu_stricto_1
SILVA_123_SSURef_tax_silva_full_align_trunc.fasta.gz	Bacteria;Firmicutes;Clostridia;Clostridiales;Clostridiaceae_1;Clostridium_sensu_stricto_1
SILVA_128_SSURef_tax_silva.fasta.gz	Bacteria;Firmicutes;Clostridia;Clostridiales;Clostridiaceae_1;Clostridium_sensu_stricto_1
SILVA_128_SSURef_tax_silva_full_align_trunc.fasta.gz	Bacteria;Firmicutes;Clostridia;Clostridiales;Clostridiaceae_1;Clostridium_sensu_stricto_1
SILVA_132_SSURef_tax_silva.fasta.gz	Bacteria;Firmicutes;Clostridia;Clostridiales;Clostridiaceae_1;Clostridium_sensu_stricto_1
SILVA_132_SSURef_tax_silva_full_align_trunc.fasta.gz	Bacteria;Firmicutes;Clostridia;Clostridiales;Clostridiaceae_1;Clostridium_sensu_stricto_1
bac_ssu_r86.1_20180911.fna.gz	Bacteria;Firmicutes_A;Clostridia;Clostridiales;Clostridiaceae;Clostridium
55	TACGGAGGATGCGAGCGTTATCCGGATTTATTGGGTTTAAAGGGTGCGTAGGTTGTTCGGTAAGTCAGCG_CCTGTTTGATACCCACGCCTTCGTGCTTCAGTGTCAGTCGCAGTATGGCAAGCTGCCTTCGCAATCGGAG
SILVA_123_SSURef_tax_silva.fasta.gz	Bacteria;Bacteroidetes;Bacteroidia;Bacteroidales;Porphyromonadaceae;Porphyromonas
SILVA_123_SSURef_tax_silva_full_align_trunc.fasta.gz	Bacteria;Bacteroidetes;Bacteroidia;Bacteroidales;Porphyromonadaceae;Porphyromonas
SILVA_128_SSURef_tax_silva.fasta.gz	Bacteria;Bacteroidetes;Bacteroidia;Bacteroidales;Porphyromonadaceae;Porphyromonas
SILVA_128_SSURef_tax_silva_full_align_trunc.fasta.gz	Bacteria;Bacteroidetes;Bacteroidia;Bacteroidales;Porphyromonadaceae;Porphyromonas
SILVA_132_SSURef_tax_silva.fasta.gz	Bacteria;Bacteroidetes;Bacteroidia;Bacteroidales;Porphyromonadaceae;Porphyromonas
SILVA_132_SSURef_tax_silva_full_align_trunc.fasta.gz	Bacteria;Bacteroidetes;Bacteroidia;Bacteroidales;Porphyromonadaceae;Porphyromonas
bac_ssu_r86.1_20180911.fna.gz	Bacteria;Bacteroidota;Bacteroidia;Bacteroidales;Porphyromonadaceae;Porphyromonas
56	TACGTAGGTCCCGAGCGTTGTCCGGATTTATTGGGCGTAAAGCGAGCGCAGGCGGTTCTTTAAGTCTGAA_CCTGTTTGCTCCCCACGCTTTCGAGCCTCAGCGTCAGTTACAGACCAGAGAGCCGCTTTCGCCACCGGTG
SILVA_123_SSURef_tax_silva.fasta.gz	Bacteria;Firmicutes;Bacilli;Lactobacillales;Streptococcaceae;Streptococcus
SILVA_123_SSURef_tax_silva_full_align_trunc.fasta.gz	Bacteria;Firmicutes;Bacilli;Lactobacillales;Streptococcaceae;Streptococcus
SILVA_128_SSURef_tax_silva.fasta.gz	Bacteria;Firmicutes;Bacilli;Lactobacillales;Streptococcaceae;Streptococcus
SILVA_128_SSURef_tax_silva_full_align_trunc.fasta.gz	Bacteria;Firmicutes;Bacilli;Lactobacillales;Streptococcaceae;Streptococcus
SILVA_132_SSURef_tax_silva.fasta.gz	Bacteria;Firmicutes;Bacilli;Lactobacillales;Streptococcaceae;Streptococcus
SILVA_132_SSURef_tax_silva_full_align_trunc.fasta.gz	Bacteria;Firmicutes;Bacilli;Lactobacillales;Streptococcaceae;Streptococcus
bac_ssu_r86.1_20180911.fna.gz	Bacteria;Firmicutes;Bacilli;Lactobacillales;Streptococcaceae;Streptococcus

## Sheet: mock15
1	TACGTAGGTGGCAAGCGTTGTCCGGATTTATTGGGCGTAAAGCGCGCGCAGGCGGTCTTTTAAGTCTGAT_CCTGTTTGCTCCCCACGCTTTCGCGCCTCAGCGTCAGTTACAGACCAGAGAGTCGCCTTCGCTACTGGTG
SILVA_123_SSURef_tax_silva.fasta.gz	Bacteria;Firmicutes;Bacilli;Bacillales;Listeriaceae;Listeria
SILVA_123_SSURef_tax_silva_full_align_trunc.fasta.gz	Bacteria;Firmicutes;Bacilli;Bacillales;Listeriaceae;Listeria
SILVA_128_SSURef_tax_silva.fasta.gz	Bacteria;Firmicutes;Bacilli;Bacillales;Listeriaceae;Listeria
SILVA_128_SSURef_tax_silva_full_align_trunc.fasta.gz	Bacteria;Firmicutes;Bacilli;Bacillales;Listeriaceae;Listeria
SILVA_132_SSURef_tax_silva.fasta.gz	Bacteria;Firmicutes;Bacilli;Bacillales;Listeriaceae;Listeria
SILVA_132_SSURef_tax_silva_full_align_trunc.fasta.gz	Bacteria;Firmicutes;Bacilli;Bacillales;Listeriaceae;Listeria
bac_ssu_r86.1_20180911.fna.gz	Bacteria;Firmicutes;Bacilli;Lactobacillales;Listeriaceae;Listeria
2	TACGTAGGGTGCGAGCGTTAATCGGAATTACTGGGCGTAAAGCGGGCGCAGACGGTTACTTAAGCAGGAT_CCTGTTTGCTACCCACGCTTTCGGGCATGAACGTCAGTGTTGTCCCAGGAGGCTGCCTTCGCTATCGGTA
SILVA_123_SSURef_tax_silva.fasta.gz	Bacteria;Proteobacteria;Betaproteobacteria;Neisseriales;Neisseriaceae;Neisseria
SILVA_123_SSURef_tax_silva_full_align_trunc.fasta.gz	Bacteria;Proteobacteria;Betaproteobacteria;Neisseriales;Neisseriaceae;Neisseria
SILVA_128_SSURef_tax_silva.fasta.gz	Bacteria;Proteobacteria;Betaproteobacteria;Neisseriales;Neisseriaceae;Neisseria
SILVA_128_SSURef_tax_silva_full_align_trunc.fasta.gz	Bacteria;Proteobacteria;Betaproteobacteria;Neisseriales;Neisseriaceae;Neisseria
SILVA_132_SSURef_tax_silva.fasta.gz	Bacteria;Proteobacteria;Gammaproteobacteria;Betaproteobacteriales;Neisseriaceae;Neisseria
SILVA_132_SSURef_tax_silva_full_align_trunc.fasta.gz	Bacteria;Proteobacteria;Gammaproteobacteria;Betaproteobacteriales;Neisseriaceae;Neisseria
bac_ssu_r86.1_20180911.fna.gz	Bacteria;Proteobacteria;Gammaproteobacteria;Betaproteobacteriales;Neisseriaceae;Neisseria
3	TACGAAGGGTGCAAGCGTTAATCGGAATTACTGGGCGTAAAGCGCGCGTAGGTGGTTCAGCAAGTTGGAT_CCTGTTTGCTCCCCACGCTTTCGCACCTCAGTGTCAGTATCAGTCCAGGTGGTCGCCTTCGCTACTGGTG
SILVA_123_SSURef_tax_silva.fasta.gz	Bacteria;Proteobacteria;Gammaproteobacteria;Pseudomonadales;Pseudomonadaceae;Pseudomonas
SILVA_123_SSURef_tax_silva_full_align_trunc.fasta.gz	Bacteria;Proteobacteria;Gammaproteobacteria;Pseudomonadales;Pseudomonadaceae;Pseudomonas
SILVA_128_SSURef_tax_silva.fasta.gz	Bacteria;Proteobacteria;Gammaproteobacteria;Pseudomonadales;Pseudomonadaceae;Pseudomonas
SILVA_128_SSURef_tax_silva_full_align_trunc.fasta.gz	Bacteria;Proteobacteria;Gammaproteobacteria;Pseudomonadales;Pseudomonadaceae;Pseudomonas
SILVA_132_SSURef_tax_silva.fasta.gz	Bacteria;Proteobacteria;Gammaproteobacteria;Pseudomonadales;Pseudomonadaceae;Pseudomonas
SILVA_132_SSURef_tax_silva_full_align_trunc.fasta.gz	Bacteria;Proteobacteria;Gammaproteobacteria;Pseudomonadales;Pseudomonadaceae;Pseudomonas
bac_ssu_r86.1_20180911.fna.gz	Bacteria;Proteobacteria;Gammaproteobacteria;Pseudomonadales;Pseudomonadaceae
4	TACGGAGGGTGCAAGCGTTACCCGGAATCACTGGGCGTAAAGGGCGTGTAGGCGGAAATTTAAGTCTGGT_CCGGTTTGCTCCCCACACTTTCGCGCCTCAGCGTCACCTTCTGTCCAGTAACTTGCCTTCGCCATTGGTG
SILVA_123_SSURef_tax_silva.fasta.gz	Bacteria;Deinococcus-Thermus;Deinococci;Deinococcales;Deinococcaceae;Deinococcus
SILVA_123_SSURef_tax_silva_full_align_trunc.fasta.gz	Bacteria;Deinococcus-Thermus;Deinococci;Deinococcales;Deinococcaceae;Deinococcus
SILVA_128_SSURef_tax_silva.fasta.gz	Bacteria;Deinococcus-Thermus;Deinococci;Deinococcales;Deinococcaceae;Deinococcus
SILVA_128_SSURef_tax_silva_full_align_trunc.fasta.gz	Bacteria;Deinococcus-Thermus;Deinococci;Deinococcales;Deinococcaceae;Deinococcus
SILVA_132_SSURef_tax_silva.fasta.gz	Bacteria;Deinococcus-Thermus;Deinococci;Deinococcales;Deinococcaceae;Deinococcus
SILVA_132_SSURef_tax_silva_full_align_trunc.fasta.gz	Bacteria;Deinococcus-Thermus;Deinococci;Deinococcales;Deinococcaceae;Deinococcus
bac_ssu_r86.1_20180911.fna.gz	Bacteria;Deinococcota;Deinococci;Deinococcales;Deinococcaceae;Deinococcus
5	TACGTAGGTGGCAAGCGTTGTCCGGATTTACTGGGCGTAAAGGGAGCGTAGGTGGATATTTAAGTGGGAT_CCTGTTTGCTCCCCACGCTTTCGCGCCTCAGTGTCAGTTACAGTCCAGAAAGTCGCCTTCGCCACTGGTA
SILVA_123_SSURef_tax_silva.fasta.gz	Bacteria;Firmicutes;Clostridia;Clostridiales;Clostridiaceae_1;Clostridium_sensu_stricto_1
SILVA_123_SSURef_tax_silva_full_align_trunc.fasta.gz	Bacteria;Firmicutes;Clostridia;Clostridiales;Clostridiaceae_1;Clostridium_sensu_stricto_1
SILVA_128_SSURef_tax_silva.fasta.gz	Bacteria;Firmicutes;Clostridia;Clostridiales;Clostridiaceae_1;Clostridium_sensu_stricto_1
SILVA_128_SSURef_tax_silva_full_align_trunc.fasta.gz	Bacteria;Firmicutes;Clostridia;Clostridiales;Clostridiaceae_1;Clostridium_sensu_stricto_1
SILVA_132_SSURef_tax_silva.fasta.gz	Bacteria;Firmicutes;Clostridia;Clostridiales;Clostridiaceae_1;Clostridium_sensu_stricto_1
SILVA_132_SSURef_tax_silva_full_align_trunc.fasta.gz	Bacteria;Firmicutes;Clostridia;Clostridiales;Clostridiaceae_1;Clostridium_sensu_stricto_1
bac_ssu_r86.1_20180911.fna.gz	Bacteria;Firmicutes_A;Clostridia;Clostridiales;Clostridiaceae;Clostridium
6	TACGTAGGTGGCAAGCGNTGTCCGGATTTATTGGGCGTAAAGCGCGCGCAGGCGGTCTTTTAAGTCTGAT_CCTGTTTGCTCCCCACGCTTTCGCGCCTCAGCGTCAGTTACAGACCAGAGAGTCGCCTTCGCCACTGGTG
SILVA_123_SSURef_tax_silva.fasta.gz	Bacteria;Firmicutes;Bacilli;Bacillales;Listeriaceae;Listeria
SILVA_123_SSURef_tax_silva_full_align_trunc.fasta.gz	Bacteria;Firmicutes;Bacilli;Bacillales;Listeriaceae;Listeria
SILVA_128_SSURef_tax_silva.fasta.gz	Bacteria;Firmicutes;Bacilli;Bacillales;Listeriaceae;Listeria
SILVA_128_SSURef_tax_silva_full_align_trunc.fasta.gz	Bacteria;Firmicutes;Bacilli;Bacillales;Listeriaceae;Listeria
SILVA_132_SSURef_tax_silva.fasta.gz	Bacteria;Firmicutes;Bacilli;Bacillales;Listeriaceae;Listeria
SILVA_132_SSURef_tax_silva_full_align_trunc.fasta.gz	Bacteria;Firmicutes;Bacilli;Bacillales;Listeriaceae;Listeria
bac_ssu_r86.1_20180911.fna.gz	Bacteria;Firmicutes;Bacilli;Lactobacillales;Listeriaceae;Listeria
7	TACGTAGGTGGCAAGCGTTATCCGGAATTATTGGGCGTAAAGCGCGCGTAGGCGGTTTTTTAAGTCTGAT_CCTGTTTGATACCCACGCTTTCGCACATCAGCGTCAGTTACAGACCAGAAAGTCGCCTTCGCCACTGGTG
SILVA_123_SSURef_tax_silva.fasta.gz	Bacteria;Firmicutes;Bacilli;Bacillales;Staphylococcaceae;Staphylococcus
SILVA_123_SSURef_tax_silva_full_align_trunc.fasta.gz	Bacteria;Firmicutes;Bacilli;Bacillales;Staphylococcaceae;Staphylococcus
SILVA_128_SSURef_tax_silva.fasta.gz	Bacteria;Firmicutes;Bacilli;Bacillales;Staphylococcaceae;Staphylococcus
SILVA_128_SSURef_tax_silva_full_align_trunc.fasta.gz	Bacteria;Firmicutes;Bacilli;Bacillales;Staphylococcaceae;Staphylococcus
SILVA_132_SSURef_tax_silva.fasta.gz	Bacteria;Firmicutes;Bacilli;Bacillales;Staphylococcaceae;Staphylococcus
SILVA_132_SSURef_tax_silva_full_align_trunc.fasta.gz	Bacteria;Firmicutes;Bacilli;Bacillales;Staphylococcaceae;Staphylococcus
bac_ssu_r86.1_20180911.fna.gz	Bacteria;Firmicutes;Bacilli;Staphylococcales;Staphylococcaceae;Staphylococcus
8	TACGGAGGGTGCAAGCGTTACTCGGAATCACTGGGCGTAAAGAGCGCGTAGGCGGGATAGTCAGTCAGGT_CCTGTTTGCTCCCCACGCTTTCGCGCAATCAGCGTCAGTAATGTTCCAGCAGGTCGCCTTCGCCATGAGT
SILVA_123_SSURef_tax_silva.fasta.gz	Bacteria;Proteobacteria;Epsilonproteobacteria;Campylobacterales;Helicobacteraceae;Helicobacter
SILVA_123_SSURef_tax_silva_full_align_trunc.fasta.gz	Bacteria;Proteobacteria;Epsilonproteobacteria;Campylobacterales;Helicobacteraceae;Helicobacter
SILVA_128_SSURef_tax_silva.fasta.gz	Bacteria;Proteobacteria;Epsilonproteobacteria;Campylobacterales;Helicobacteraceae;Helicobacter
SILVA_128_SSURef_tax_silva_full_align_trunc.fasta.gz	Bacteria;Proteobacteria;Epsilonproteobacteria;Campylobacterales;Helicobacteraceae;Helicobacter
SILVA_132_SSURef_tax_silva.fasta.gz	Bacteria;Epsilonbacteraeota;Campylobacteria;Campylobacterales;Helicobacteraceae;Helicobacter
SILVA_132_SSURef_tax_silva_full_align_trunc.fasta.gz	Bacteria;Epsilonbacteraeota;Campylobacteria;Campylobacterales;Helicobacteraceae;Helicobacter
bac_ssu_r86.1_20180911.fna.gz	Bacteria;Campylobacterota;Campylobacteria;Campylobacterales;Helicobacteraceae;Helicobacter
9	TACGGAGGGTGCAAGCGTTAATCGGAATTACTGGGCGTAAAGCGCACGCAGGCGGTTTGTTAAGTCAGAT_CCTGTTTGCTCCCCACGCTTTCGCACCTGAGCGTCAGTCTTCGTCCAGGGGGCCGCCTTCGCCACCGGTA
SILVA_123_SSURef_tax_silva.fasta.gz	Bacteria;Proteobacteria;Gammaproteobacteria;Enterobacteriales;Enterobacteriaceae
SILVA_123_SSURef_tax_silva_full_align_trunc.fasta.gz	Bacteria;Proteobacteria;Gammaproteobacteria;Enterobacteriales;Enterobacteriaceae
SILVA_128_SSURef_tax_silva.fasta.gz	Bacteria;Proteobacteria;Gammaproteobacteria;Enterobacteriales;Enterobacteriaceae
SILVA_128_SSURef_tax_silva_full_align_trunc.fasta.gz	Bacteria;Proteobacteria;Gammaproteobacteria;Enterobacteriales;Enterobacteriaceae
SILVA_132_SSURef_tax_silva.fasta.gz	Bacteria;Proteobacteria;Gammaproteobacteria;Enterobacteriales;Enterobacteriaceae
SILVA_132_SSURef_tax_silva_full_align_trunc.fasta.gz	Bacteria;Proteobacteria;Gammaproteobacteria;Enterobacteriales;Enterobacteriaceae
bac_ssu_r86.1_20180911.fna.gz	Bacteria;Proteobacteria;Gammaproteobacteria;Enterobacterales;Enterobacteriaceae
10	TACGAAGGGTGCAAGCGTTAATCGGAATTACTGGGCGTAAAGCGCGCGTAGGTGGTTCAGCAAGTTGGAT_CCTGTTTGCTCCCCACGCTTTCGCACCTCAGTGTCAGTATCAGTCCAGGTGGTCGCCTTCGCCACTGGTG
SILVA_123_SSURef_tax_silva.fasta.gz	Bacteria;Proteobacteria;Gammaproteobacteria;Pseudomonadales;Pseudomonadaceae;Pseudomonas
SILVA_123_SSURef_tax_silva_full_align_trunc.fasta.gz	Bacteria;Proteobacteria;Gammaproteobacteria;Pseudomonadales;Pseudomonadaceae;Pseudomonas
SILVA_128_SSURef_tax_silva.fasta.gz	Bacteria;Proteobacteria;Gammaproteobacteria;Pseudomonadales;Pseudomonadaceae;Pseudomonas
SILVA_128_SSURef_tax_silva_full_align_trunc.fasta.gz	Bacteria;Proteobacteria;Gammaproteobacteria;Pseudomonadales;Pseudomonadaceae;Pseudomonas
SILVA_132_SSURef_tax_silva.fasta.gz	Bacteria;Proteobacteria;Gammaproteobacteria;Pseudomonadales;Pseudomonadaceae;Pseudomonas
SILVA_132_SSURef_tax_silva_full_align_trunc.fasta.gz	Bacteria;Proteobacteria;Gammaproteobacteria;Pseudomonadales;Pseudomonadaceae;Pseudomonas
bac_ssu_r86.1_20180911.fna.gz	Bacteria;Proteobacteria;Gammaproteobacteria;Pseudomonadales;Pseudomonadaceae
11	TACGTAGGTGGCAAGCGTTGTCCGGATTTACTGGGCGTAAAGGGAGCGTAGGTGGATATTTAAGTGGGAT_CCTGTTTGCTCCCCACGCTTTCGAGCCTCAGTGTCAGTTACAGTCCAGAAAGTCGCCTTCGCCACTGGTA
SILVA_123_SSURef_tax_silva.fasta.gz	Bacteria;Firmicutes;Clostridia;Clostridiales;Clostridiaceae_1;Clostridium_sensu_stricto_1
SILVA_123_SSURef_tax_silva_full_align_trunc.fasta.gz	Bacteria;Firmicutes;Clostridia;Clostridiales;Clostridiaceae_1;Clostridium_sensu_stricto_1
SILVA_128_SSURef_tax_silva.fasta.gz	Bacteria;Firmicutes;Clostridia;Clostridiales;Clostridiaceae_1;Clostridium_sensu_stricto_1
SILVA_128_SSURef_tax_silva_full_align_trunc.fasta.gz	Bacteria;Firmicutes;Clostridia;Clostridiales;Clostridiaceae_1;Clostridium_sensu_stricto_1
SILVA_132_SSURef_tax_silva.fasta.gz	Bacteria;Firmicutes;Clostridia;Clostridiales;Clostridiaceae_1;Clostridium_sensu_stricto_1
SILVA_132_SSURef_tax_silva_full_align_trunc.fasta.gz	Bacteria;Firmicutes;Clostridia;Clostridiales;Clostridiaceae_1;Clostridium_sensu_stricto_1
bac_ssu_r86.1_20180911.fna.gz	Bacteria;Firmicutes_A;Clostridia;Clostridiales;Clostridiaceae;Clostridium
12	TACGGAGGGTGCAAGCGNTACCCGGAATCACTGGGCGTAAAGGGCGTGTAGGCGGAAATTTAAGTCTGGT_CCGGTTTGCTCCCCACACTTTCGCGCCTCAGCGTCACCTTCTGTCCAGTAACTTGCCTTCGCCATTGGTG
SILVA_123_SSURef_tax_silva.fasta.gz	Bacteria;Deinococcus-Thermus;Deinococci;Deinococcales;Deinococcaceae;Deinococcus
SILVA_123_SSURef_tax_silva_full_align_trunc.fasta.gz	Bacteria;Deinococcus-Thermus;Deinococci;Deinococcales;Deinococcaceae;Deinococcus
SILVA_128_SSURef_tax_silva.fasta.gz	Bacteria;Deinococcus-Thermus;Deinococci;Deinococcales;Deinococcaceae;Deinococcus
SILVA_128_SSURef_tax_silva_full_align_trunc.fasta.gz	Bacteria;Deinococcus-Thermus;Deinococci;Deinococcales;Deinococcaceae;Deinococcus
SILVA_132_SSURef_tax_silva.fasta.gz	Bacteria;Deinococcus-Thermus;Deinococci;Deinococcales;Deinococcaceae;Deinococcus
SILVA_132_SSURef_tax_silva_full_align_trunc.fasta.gz	Bacteria;Deinococcus-Thermus;Deinococci;Deinococcales;Deinococcaceae;Deinococcus
bac_ssu_r86.1_20180911.fna.gz	Bacteria;Deinococcota;Deinococci;Deinococcales;Deinococcaceae;Deinococcus
13	TACGGAGGGTGCAAGCGNTACTCGGAATCACTGGGCGTAAAGAGCGCGTAGGCGGGATAGTCAGTCAGGT_CCTGTTTGCTCCCCACGCTTTCGCGCAATCAGCGTCAGTAATGTTCCAGCAGGTCGCCTTCGCAATGAGT
SILVA_123_SSURef_tax_silva.fasta.gz	Bacteria;Proteobacteria;Epsilonproteobacteria;Campylobacterales;Helicobacteraceae;Helicobacter
SILVA_123_SSURef_tax_silva_full_align_trunc.fasta.gz	Bacteria;Proteobacteria;Epsilonproteobacteria;Campylobacterales;Helicobacteraceae;Helicobacter
SILVA_128_SSURef_tax_silva.fasta.gz	Bacteria;Proteobacteria;Epsilonproteobacteria;Campylobacterales;Helicobacteraceae;Helicobacter
SILVA_128_SSURef_tax_silva_full_align_trunc.fasta.gz	Bacteria;Proteobacteria;Epsilonproteobacteria;Campylobacterales;Helicobacteraceae;Helicobacter
SILVA_132_SSURef_tax_silva.fasta.gz	Bacteria;Epsilonbacteraeota;Campylobacteria;Campylobacterales;Helicobacteraceae;Helicobacter
SILVA_132_SSURef_tax_silva_full_align_trunc.fasta.gz	Bacteria;Epsilonbacteraeota;Campylobacteria;Campylobacterales;Helicobacteraceae;Helicobacter
bac_ssu_r86.1_20180911.fna.gz	Bacteria;Campylobacterota;Campylobacteria;Campylobacterales;Helicobacteraceae;Helicobacter
14	TACAGAGGGTGCGAGCGTTAATCGGATTTACTGGGCGTAAAGCGTGCGTAGGCGGCTTATTAAGTCGGAT_CCTGTTTGCTCCCCATGCTTTCGTACCTCAGCGTCAGTATTAGGCCAGATGGCTGCCTTCGCCATCGGTA
SILVA_123_SSURef_tax_silva.fasta.gz	Bacteria;Proteobacteria;Gammaproteobacteria;Pseudomonadales;Moraxellaceae;Acinetobacter
SILVA_123_SSURef_tax_silva_full_align_trunc.fasta.gz	Bacteria;Proteobacteria;Gammaproteobacteria;Pseudomonadales;Moraxellaceae;Acinetobacter
SILVA_128_SSURef_tax_silva.fasta.gz	Bacteria;Proteobacteria;Gammaproteobacteria;Pseudomonadales;Moraxellaceae;Acinetobacter
SILVA_128_SSURef_tax_silva_full_align_trunc.fasta.gz	Bacteria;Proteobacteria;Gammaproteobacteria;Pseudomonadales;Moraxellaceae;Acinetobacter
SILVA_132_SSURef_tax_silva.fasta.gz	Bacteria;Proteobacteria;Gammaproteobacteria;Pseudomonadales;Moraxellaceae;Acinetobacter
SILVA_132_SSURef_tax_silva_full_align_trunc.fasta.gz	Bacteria;Proteobacteria;Gammaproteobacteria;Pseudomonadales;Moraxellaceae;Acinetobacter
bac_ssu_r86.1_20180911.fna.gz	Bacteria;Proteobacteria;Gammaproteobacteria;Pseudomonadales;Moraxellaceae;Acinetobacter
15	TACAGAGGGTGCGAGCGTTAATCGGATTTACTGGGCGTAAAGCGTGCGTAGGCGGCTTATTAAGTCGGAT_CCTGTTTGCTCCCCATGCTTTCGTACCTCAGCGTCAGTATTAGGCCAGATGGCTGCCTTCGCTATCGGTA
SILVA_123_SSURef_tax_silva.fasta.gz	Bacteria;Proteobacteria;Gammaproteobacteria;Pseudomonadales;Moraxellaceae;Acinetobacter
SILVA_123_SSURef_tax_silva_full_align_trunc.fasta.gz	Bacteria;Proteobacteria;Gammaproteobacteria;Pseudomonadales;Moraxellaceae;Acinetobacter
SILVA_128_SSURef_tax_silva.fasta.gz	Bacteria;Proteobacteria;Gammaproteobacteria;Pseudomonadales;Moraxellaceae;Acinetobacter
SILVA_128_SSURef_tax_silva_full_align_trunc.fasta.gz	Bacteria;Proteobacteria;Gammaproteobacteria;Pseudomonadales;Moraxellaceae;Acinetobacter
SILVA_132_SSURef_tax_silva.fasta.gz	Bacteria;Proteobacteria;Gammaproteobacteria;Pseudomonadales;Moraxellaceae;Acinetobacter
SILVA_132_SSURef_tax_silva_full_align_trunc.fasta.gz	Bacteria;Proteobacteria;Gammaproteobacteria;Pseudomonadales;Moraxellaceae;Acinetobacter
bac_ssu_r86.1_20180911.fna.gz	Bacteria;Proteobacteria;Gammaproteobacteria;Pseudomonadales;Moraxellaceae;Acinetobacter
16	TACGTAGGTGGCAAGCGNTGTCCGGATTTATTGGGCGTAAAGCGAGCGCAGGCGGTTTCTTAAGTCTGAT_CCTGTTTGCTCCCCACGCTTTCGAGCCTCAGCGTCAGTTACAGACCAGAGAGCCGCCTTCGCCACTGGTG
SILVA_123_SSURef_tax_silva.fasta.gz	Bacteria;Firmicutes;Bacilli;Lactobacillales;Enterococcaceae;Enterococcus
SILVA_123_SSURef_tax_silva_full_align_trunc.fasta.gz	Bacteria;Firmicutes;Bacilli;Lactobacillales;Enterococcaceae;Enterococcus
SILVA_128_SSURef_tax_silva.fasta.gz	Bacteria;Firmicutes;Bacilli;Lactobacillales;Enterococcaceae;Enterococcus
SILVA_128_SSURef_tax_silva_full_align_trunc.fasta.gz	Bacteria;Firmicutes;Bacilli;Lactobacillales;Enterococcaceae;Enterococcus
SILVA_132_SSURef_tax_silva.fasta.gz	Bacteria;Firmicutes;Bacilli;Lactobacillales;Enterococcaceae;Enterococcus
SILVA_132_SSURef_tax_silva_full_align_trunc.fasta.gz	Bacteria;Firmicutes;Bacilli;Lactobacillales;Enterococcaceae;Enterococcus
bac_ssu_r86.1_20180911.fna.gz	Bacteria;Firmicutes;Bacilli;Lactobacillales;Enterococcaceae
17	TACGGAGGGTGCAAGCGTTACCCGGAATCACTGGGCGTAAAGGGCGTGTAGGCGGAAATTTAAGTCTGGT_CCGGTTTGCTACCCACACTTTCGCGCCTCAGCGTCACCTTCTGTCCAGTAACTTGCCTTCGCCATTGGTG
SILVA_123_SSURef_tax_silva.fasta.gz	Bacteria;Deinococcus-Thermus;Deinococci;Deinococcales;Deinococcaceae;Deinococcus
SILVA_123_SSURef_tax_silva_full_align_trunc.fasta.gz	Bacteria;Deinococcus-Thermus;Deinococci;Deinococcales;Deinococcaceae;Deinococcus
SILVA_128_SSURef_tax_silva.fasta.gz	Bacteria;Deinococcus-Thermus;Deinococci;Deinococcales;Deinococcaceae;Deinococcus
SILVA_128_SSURef_tax_silva_full_align_trunc.fasta.gz	Bacteria;Deinococcus-Thermus;Deinococci;Deinococcales;Deinococcaceae;Deinococcus
SILVA_132_SSURef_tax_silva.fasta.gz	Bacteria;Deinococcus-Thermus;Deinococci;Deinococcales;Deinococcaceae;Deinococcus
SILVA_132_SSURef_tax_silva_full_align_trunc.fasta.gz	Bacteria;Deinococcus-Thermus;Deinococci;Deinococcales;Deinococcaceae;Deinococcus
bac_ssu_r86.1_20180911.fna.gz	Bacteria;Deinococcota;Deinococci;Deinococcales;Deinococcaceae;Deinococcus
18	TACGTAGGTGGCAAGCGTTATCCGGAATTATTGGGCGTAAAGCGCGCGCAGGTGGTTTCTTAAGTCTGAT_CCTGTTTGCTCCCCACGCTTTCGCGCCTCAGTGTCAGTTACAGACCAGAAAGTCGCCTTCGCTACTGGTG
SILVA_123_SSURef_tax_silva.fasta.gz	Bacteria;Firmicutes;Bacilli;Bacillales;Bacillaceae;Bacillus
SILVA_123_SSURef_tax_silva_full_align_trunc.fasta.gz	Bacteria;Firmicutes;Bacilli;Bacillales;Bacillaceae;Bacillus
SILVA_128_SSURef_tax_silva.fasta.gz	Bacteria;Firmicutes;Bacilli;Bacillales;Bacillaceae;Bacillus
SILVA_128_SSURef_tax_silva_full_align_trunc.fasta.gz	Bacteria;Firmicutes;Bacilli;Bacillales;Bacillaceae;Bacillus
SILVA_132_SSURef_tax_silva.fasta.gz	Bacteria;Firmicutes;Bacilli;Bacillales;Bacillaceae;Bacillus
SILVA_132_SSURef_tax_silva_full_align_trunc.fasta.gz	Bacteria;Firmicutes;Bacilli;Bacillales;Bacillaceae;Bacillus
bac_ssu_r86.1_20180911.fna.gz	Bacteria;Firmicutes;Bacilli;Bacillales;Bacillaceae_G;Bacillus_A
19	TACGGAGGGGGCTAGCGTTATTCGGAATTACTGGGCGTAAAGCGCACGTAGGCGGATCGGAAAGTCAGAG_CCTGTTTGCTCCCCACGCTTTCGCACCTCAGCGTCAGTATCGAGCCAGTGAGCCGCCTTCGCCACTGGTG
SILVA_123_SSURef_tax_silva.fasta.gz	Bacteria;Proteobacteria;Alphaproteobacteria;Rhodobacterales;Rhodobacteraceae;Rhodobacter
SILVA_123_SSURef_tax_silva_full_align_trunc.fasta.gz	Bacteria;Proteobacteria;Alphaproteobacteria;Rhodobacterales;Rhodobacteraceae;Rhodobacter
SILVA_128_SSURef_tax_silva.fasta.gz	Bacteria;Proteobacteria;Alphaproteobacteria;Rhodobacterales;Rhodobacteraceae;Rhodobacter
SILVA_128_SSURef_tax_silva_full_align_trunc.fasta.gz	Bacteria;Proteobacteria;Alphaproteobacteria;Rhodobacterales;Rhodobacteraceae;Rhodobacter
SILVA_132_SSURef_tax_silva.fasta.gz	Bacteria;Proteobacteria;Alphaproteobacteria;Rhodobacterales;Rhodobacteraceae;Rhodobacter
SILVA_132_SSURef_tax_silva_full_align_trunc.fasta.gz	Bacteria;Proteobacteria;Alphaproteobacteria;Rhodobacterales;Rhodobacteraceae;Rhodobacter
bac_ssu_r86.1_20180911.fna.gz	Bacteria;Proteobacteria;Alphaproteobacteria;Rhodobacterales;Rhodobacteraceae;Rhodobacter_A
20	TACGTAGGTGGCAAGCGNTGTCCGGATTTATTGGGCGTAAAGCGAGTGCAGGCGGTTCAATAAGTCTGAT_CCTGTTCGCTACCCATGCTTTCGAGCCTCAGCGTCAGTTGCAGACCAGAGAGCCGCCTTCGCCACTGGTG
SILVA_123_SSURef_tax_silva.fasta.gz	Bacteria;Firmicutes;Bacilli;Lactobacillales;Lactobacillaceae;Lactobacillus
SILVA_123_SSURef_tax_silva_full_align_trunc.fasta.gz	Bacteria;Firmicutes;Bacilli;Lactobacillales;Lactobacillaceae;Lactobacillus
SILVA_128_SSURef_tax_silva.fasta.gz	Bacteria;Firmicutes;Bacilli;Lactobacillales;Lactobacillaceae;Lactobacillus
SILVA_128_SSURef_tax_silva_full_align_trunc.fasta.gz	Bacteria;Firmicutes;Bacilli;Lactobacillales;Lactobacillaceae;Lactobacillus
SILVA_132_SSURef_tax_silva.fasta.gz	Bacteria;Firmicutes;Bacilli;Lactobacillales;Lactobacillaceae;Lactobacillus
SILVA_132_SSURef_tax_silva_full_align_trunc.fasta.gz	Bacteria;Firmicutes;Bacilli;Lactobacillales;Lactobacillaceae;Lactobacillus
bac_ssu_r86.1_20180911.fna.gz	Bacteria;Firmicutes;Bacilli;Lactobacillales;Lactobacillaceae;Lactobacillus
21	TACGGAGGATCCGAGCGTTATCCGGATTTATTGGGTTTAAAGGGAGCGTAGATGGATGTTTAAGTCAGTT_CCTGTTTGATACCCACACTTTCGAGCCTCAATGTCAGTTGCAGCTTAGCAGGCTGCCTTCGCAATCGGAG
SILVA_123_SSURef_tax_silva.fasta.gz	Bacteria;Bacteroidetes;Bacteroidia;Bacteroidales;Bacteroidaceae;Bacteroides
SILVA_123_SSURef_tax_silva_full_align_trunc.fasta.gz	Bacteria;Bacteroidetes;Bacteroidia;Bacteroidales;Bacteroidaceae;Bacteroides
SILVA_128_SSURef_tax_silva.fasta.gz	Bacteria;Bacteroidetes;Bacteroidia;Bacteroidales;Bacteroidaceae;Bacteroides
SILVA_128_SSURef_tax_silva_full_align_trunc.fasta.gz	Bacteria;Bacteroidetes;Bacteroidia;Bacteroidales;Bacteroidaceae;Bacteroides
SILVA_132_SSURef_tax_silva.fasta.gz	Bacteria;Bacteroidetes;Bacteroidia;Bacteroidales;Bacteroidaceae;Bacteroides
SILVA_132_SSURef_tax_silva_full_align_trunc.fasta.gz	Bacteria;Bacteroidetes;Bacteroidia;Bacteroidales;Bacteroidaceae;Bacteroides
bac_ssu_r86.1_20180911.fna.gz	Bacteria;Bacteroidota
22	TACGGAGGGTGCAAGCGTTAATCGGAATTACTGGGCGTAAAGCGCACGCAGGCGGTTTGTTAAGTCAGAT_CCTGTTTGCTCCCCACGCTTTCGCACCTGAGCGTCAGTCTTCGTCCAGGGGGCCGCCTTCGCTACCGGTA
SILVA_123_SSURef_tax_silva.fasta.gz	Bacteria;Proteobacteria;Gammaproteobacteria;Enterobacteriales;Enterobacteriaceae
SILVA_123_SSURef_tax_silva_full_align_trunc.fasta.gz	Bacteria;Proteobacteria;Gammaproteobacteria;Enterobacteriales;Enterobacteriaceae
SILVA_128_SSURef_tax_silva.fasta.gz	Bacteria;Proteobacteria;Gammaproteobacteria;Enterobacteriales;Enterobacteriaceae
SILVA_128_SSURef_tax_silva_full_align_trunc.fasta.gz	Bacteria;Proteobacteria;Gammaproteobacteria;Enterobacteriales;Enterobacteriaceae
SILVA_132_SSURef_tax_silva.fasta.gz	Bacteria;Proteobacteria;Gammaproteobacteria;Enterobacteriales;Enterobacteriaceae
SILVA_132_SSURef_tax_silva_full_align_trunc.fasta.gz	Bacteria;Proteobacteria;Gammaproteobacteria;Enterobacteriales;Enterobacteriaceae
bac_ssu_r86.1_20180911.fna.gz	Bacteria;Proteobacteria;Gammaproteobacteria;Enterobacterales;Enterobacteriaceae
23	TACAGAGGGTGCGAGCGNTAATCGGATTTACTGGGCGTAAAGCGTGCGTAGGCGGCTTATTAAGTCGGAT_CCTGTTTGCTCCCCATGCTTTCGTACCTCAGCGTCAGTATTAGGCCAGATGGCTGCCTTCGCCATCGGTA
SILVA_123_SSURef_tax_silva.fasta.gz	Bacteria;Proteobacteria;Gammaproteobacteria;Pseudomonadales;Moraxellaceae;Acinetobacter
SILVA_123_SSURef_tax_silva_full_align_trunc.fasta.gz	Bacteria;Proteobacteria;Gammaproteobacteria;Pseudomonadales;Moraxellaceae;Acinetobacter
SILVA_128_SSURef_tax_silva.fasta.gz	Bacteria;Proteobacteria;Gammaproteobacteria;Pseudomonadales;Moraxellaceae;Acinetobacter
SILVA_128_SSURef_tax_silva_full_align_trunc.fasta.gz	Bacteria;Proteobacteria;Gammaproteobacteria;Pseudomonadales;Moraxellaceae;Acinetobacter
SILVA_132_SSURef_tax_silva.fasta.gz	Bacteria;Proteobacteria;Gammaproteobacteria;Pseudomonadales;Moraxellaceae;Acinetobacter
SILVA_132_SSURef_tax_silva_full_align_trunc.fasta.gz	Bacteria;Proteobacteria;Gammaproteobacteria;Pseudomonadales;Moraxellaceae;Acinetobacter
bac_ssu_r86.1_20180911.fna.gz	Bacteria;Proteobacteria;Gammaproteobacteria;Pseudomonadales;Moraxellaceae;Acinetobacter
24	TACGGAGGGTGCAAGCGTTACCCGGAATCACTGGGCGTAAAGGGCGTGTAGGCGGAAATTTAAGTCTGGT_CCGGTTTGCTCCCCACACTTTCGCGCCTCAGCGTCACCTTCTGTCCAGTAACTTGCCTTCGCCCTTGGTG
SILVA_123_SSURef_tax_silva.fasta.gz	Bacteria;Deinococcus-Thermus;Deinococci;Deinococcales;Deinococcaceae;Deinococcus
SILVA_123_SSURef_tax_silva_full_align_trunc.fasta.gz	Bacteria;Deinococcus-Thermus;Deinococci;Deinococcales;Deinococcaceae;Deinococcus
SILVA_128_SSURef_tax_silva.fasta.gz	Bacteria;Deinococcus-Thermus;Deinococci;Deinococcales;Deinococcaceae;Deinococcus
SILVA_128_SSURef_tax_silva_full_align_trunc.fasta.gz	Bacteria;Deinococcus-Thermus;Deinococci;Deinococcales;Deinococcaceae;Deinococcus
SILVA_132_SSURef_tax_silva.fasta.gz	Bacteria;Deinococcus-Thermus;Deinococci;Deinococcales;Deinococcaceae;Deinococcus
SILVA_132_SSURef_tax_silva_full_align_trunc.fasta.gz	Bacteria;Deinococcus-Thermus;Deinococci;Deinococcales;Deinococcaceae;Deinococcus
bac_ssu_r86.1_20180911.fna.gz	Bacteria;Deinococcota;Deinococci;Deinococcales;Deinococcaceae;Deinococcus
25	TACGTAGGTGGCAAGCGTTGTCCGGATTTACTGGGCGTAAAGGGAGCGTAGGTGGATATTTAAGTGGGAT_CCTGTTTGCTCCCCACGCTTTCGAGCCTCAGTGTCAGTTACAGTCCAGAAAGTCGCCTTCGCTACTGGTA
SILVA_123_SSURef_tax_silva.fasta.gz	Bacteria;Firmicutes;Clostridia;Clostridiales;Clostridiaceae_1;Clostridium_sensu_stricto_1
SILVA_123_SSURef_tax_silva_full_align_trunc.fasta.gz	Bacteria;Firmicutes;Clostridia;Clostridiales;Clostridiaceae_1;Clostridium_sensu_stricto_1
SILVA_128_SSURef_tax_silva.fasta.gz	Bacteria;Firmicutes;Clostridia;Clostridiales;Clostridiaceae_1;Clostridium_sensu_stricto_1
SILVA_128_SSURef_tax_silva_full_align_trunc.fasta.gz	Bacteria;Firmicutes;Clostridia;Clostridiales;Clostridiaceae_1;Clostridium_sensu_stricto_1
SILVA_132_SSURef_tax_silva.fasta.gz	Bacteria;Firmicutes;Clostridia;Clostridiales;Clostridiaceae_1;Clostridium_sensu_stricto_1
SILVA_132_SSURef_tax_silva_full_align_trunc.fasta.gz	Bacteria;Firmicutes;Clostridia;Clostridiales;Clostridiaceae_1;Clostridium_sensu_stricto_1
bac_ssu_r86.1_20180911.fna.gz	Bacteria;Firmicutes_A;Clostridia;Clostridiales;Clostridiaceae;Clostridium
26	TACGTAGGTCCCGAGCGNTGTCCGGATTTATTGGGCGTAAAGCGAGCGCAGGCGGTTCTTTAAGTCTGAA_CCTGTTTGCTCCCCACGCTTTCGAGCCTCAGCGTCAGTTACAGACCAGAGAGCCGCTTTCGCCACCGGTG
SILVA_123_SSURef_tax_silva.fasta.gz	Bacteria;Firmicutes;Bacilli;Lactobacillales;Streptococcaceae;Streptococcus
SILVA_123_SSURef_tax_silva_full_align_trunc.fasta.gz	Bacteria;Firmicutes;Bacilli;Lactobacillales;Streptococcaceae;Streptococcus
SILVA_128_SSURef_tax_silva.fasta.gz	Bacteria;Firmicutes;Bacilli;Lactobacillales;Streptococcaceae;Streptococcus
SILVA_128_SSURef_tax_silva_full_align_trunc.fasta.gz	Bacteria;Firmicutes;Bacilli;Lactobacillales;Streptococcaceae;Streptococcus
SILVA_132_SSURef_tax_silva.fasta.gz	Bacteria;Firmicutes;Bacilli;Lactobacillales;Streptococcaceae;Streptococcus
SILVA_132_SSURef_tax_silva_full_align_trunc.fasta.gz	Bacteria;Firmicutes;Bacilli;Lactobacillales;Streptococcaceae;Streptococcus
bac_ssu_r86.1_20180911.fna.gz	Bacteria;Firmicutes;Bacilli;Lactobacillales;Streptococcaceae;Streptococcus
27	TACGTAGGTGGCAAGCGTTATCCGGCATTATTGGGCGTAAAGCGCGCGTAGGCGGTTTTTTAAGTCTGAT_CCTGTTTGATCCCCACGCTTTCGCACATCAGCGTCAGTTACAGACCAGAAAGTCGCCTTCGCCACTGGTG
SILVA_123_SSURef_tax_silva.fasta.gz	Bacteria;Firmicutes;Bacilli;Bacillales;Staphylococcaceae;Staphylococcus
SILVA_123_SSURef_tax_silva_full_align_trunc.fasta.gz	Bacteria;Firmicutes;Bacilli;Bacillales;Staphylococcaceae;Staphylococcus
SILVA_128_SSURef_tax_silva.fasta.gz	Bacteria;Firmicutes;Bacilli;Bacillales;Staphylococcaceae;Staphylococcus
SILVA_128_SSURef_tax_silva_full_align_trunc.fasta.gz	Bacteria;Firmicutes;Bacilli;Bacillales;Staphylococcaceae;Staphylococcus
SILVA_132_SSURef_tax_silva.fasta.gz	Bacteria;Firmicutes;Bacilli;Bacillales;Staphylococcaceae;Staphylococcus
SILVA_132_SSURef_tax_silva_full_align_trunc.fasta.gz	Bacteria;Firmicutes;Bacilli;Bacillales;Staphylococcaceae;Staphylococcus
bac_ssu_r86.1_20180911.fna.gz	Bacteria;Firmicutes;Bacilli;Staphylococcales;Staphylococcaceae;Staphylococcus
28	TACGGAGGATCCGAGCGTTATCCGGATTTATTGGGTTTAAAGGGAGCGTAGATGGATGTTTAAGTCAGTT_CCTGTTTGATACCCACACTTTCGAGCCTCAATGTCAGTTGCAGCTTAGCAGGCTGCCTTCGCTATCGGAG
SILVA_123_SSURef_tax_silva.fasta.gz	Bacteria;Bacteroidetes;Bacteroidia;Bacteroidales;Bacteroidaceae;Bacteroides
SILVA_123_SSURef_tax_silva_full_align_trunc.fasta.gz	Bacteria;Bacteroidetes;Bacteroidia;Bacteroidales;Bacteroidaceae;Bacteroides
SILVA_128_SSURef_tax_silva.fasta.gz	Bacteria;Bacteroidetes;Bacteroidia;Bacteroidales;Bacteroidaceae;Bacteroides
SILVA_128_SSURef_tax_silva_full_align_trunc.fasta.gz	Bacteria;Bacteroidetes;Bacteroidia;Bacteroidales;Bacteroidaceae;Bacteroides
SILVA_132_SSURef_tax_silva.fasta.gz	Bacteria;Bacteroidetes;Bacteroidia;Bacteroidales;Bacteroidaceae;Bacteroides
SILVA_132_SSURef_tax_silva_full_align_trunc.fasta.gz	Bacteria;Bacteroidetes;Bacteroidia;Bacteroidales;Bacteroidaceae;Bacteroides
bac_ssu_r86.1_20180911.fna.gz	Bacteria;Bacteroidota
29	TACGTAGGGTGCGAGCGTTAATCGGAATTACTGGGCGTAAAGCGGGCGCAGACGGTTACTTAAGCAGGAT_CCTGTTTGCTACCCACGCTTTCGGGCATGAACGTCAGTGTTGTCCCAGGAGGCTGCCTTCGCCATCGGTA
SILVA_123_SSURef_tax_silva.fasta.gz	Bacteria;Proteobacteria;Betaproteobacteria;Neisseriales;Neisseriaceae;Neisseria
SILVA_123_SSURef_tax_silva_full_align_trunc.fasta.gz	Bacteria;Proteobacteria;Betaproteobacteria;Neisseriales;Neisseriaceae;Neisseria
SILVA_128_SSURef_tax_silva.fasta.gz	Bacteria;Proteobacteria;Betaproteobacteria;Neisseriales;Neisseriaceae;Neisseria
SILVA_128_SSURef_tax_silva_full_align_trunc.fasta.gz	Bacteria;Proteobacteria;Betaproteobacteria;Neisseriales;Neisseriaceae;Neisseria
SILVA_132_SSURef_tax_silva.fasta.gz	Bacteria;Proteobacteria;Gammaproteobacteria;Betaproteobacteriales;Neisseriaceae;Neisseria
SILVA_132_SSURef_tax_silva_full_align_trunc.fasta.gz	Bacteria;Proteobacteria;Gammaproteobacteria;Betaproteobacteriales;Neisseriaceae;Neisseria
bac_ssu_r86.1_20180911.fna.gz	Bacteria;Proteobacteria;Gammaproteobacteria;Betaproteobacteriales;Neisseriaceae;Neisseria
30	TACGTAGGTGGCAAGCGTTATCCGGAATTATTGGGCGTAAAGCGCGCGTAGGCGGTTTTTTAAGTCTGAT_CCTGTTTGATCCCCACGCTTTCGCACATCAGCGTCAGTTACAGACCAGAAAGCCGCCTTCGCCACTGGTG
SILVA_123_SSURef_tax_silva.fasta.gz	Bacteria;Firmicutes;Bacilli;Bacillales;Staphylococcaceae;Staphylococcus
SILVA_123_SSURef_tax_silva_full_align_trunc.fasta.gz	Bacteria;Firmicutes;Bacilli;Bacillales;Staphylococcaceae;Staphylococcus
SILVA_128_SSURef_tax_silva.fasta.gz	Bacteria;Firmicutes;Bacilli;Bacillales;Staphylococcaceae;Staphylococcus
SILVA_128_SSURef_tax_silva_full_align_trunc.fasta.gz	Bacteria;Firmicutes;Bacilli;Bacillales;Staphylococcaceae;Staphylococcus
SILVA_132_SSURef_tax_silva.fasta.gz	Bacteria;Firmicutes;Bacilli;Bacillales;Staphylococcaceae;Staphylococcus
SILVA_132_SSURef_tax_silva_full_align_trunc.fasta.gz	Bacteria;Firmicutes;Bacilli;Bacillales;Staphylococcaceae;Staphylococcus
bac_ssu_r86.1_20180911.fna.gz	Bacteria;Firmicutes;Bacilli;Staphylococcales;Staphylococcaceae;Staphylococcus
31	TACGTAGGTGGCAAGCGNTATCCGGAATTATTGGGCGTAAAGCGCGCGCAGGTGGTTTCTTAAGTCTGAT_CCTGTTTGCTCCCCACGCTTTCGCGCCTCAGTGTCAGTTACAGACCAGAAAGTCGCCTTCGCCACTGGTG
SILVA_123_SSURef_tax_silva.fasta.gz	Bacteria;Firmicutes;Bacilli;Bacillales;Bacillaceae;Bacillus
SILVA_123_SSURef_tax_silva_full_align_trunc.fasta.gz	Bacteria;Firmicutes;Bacilli;Bacillales;Bacillaceae;Bacillus
SILVA_128_SSURef_tax_silva.fasta.gz	Bacteria;Firmicutes;Bacilli;Bacillales;Bacillaceae;Bacillus
SILVA_128_SSURef_tax_silva_full_align_trunc.fasta.gz	Bacteria;Firmicutes;Bacilli;Bacillales;Bacillaceae;Bacillus
SILVA_132_SSURef_tax_silva.fasta.gz	Bacteria;Firmicutes;Bacilli;Bacillales;Bacillaceae;Bacillus
SILVA_132_SSURef_tax_silva_full_align_trunc.fasta.gz	Bacteria;Firmicutes;Bacilli;Bacillales;Bacillaceae;Bacillus
bac_ssu_r86.1_20180911.fna.gz	Bacteria;Firmicutes;Bacilli;Bacillales;Bacillaceae_G;Bacillus_A
32	TACGGAGGGTGCAAGCGTTACTCGGAATCACTGGGCGTAAAGAGCGCGTAGGCGGGATAGTCAGTCAGGT_CCTGTTTGCTCCCCACGCTTTCGCGCAATCAGCGTCAGTAATGTTCCAGCAGGTCGCCTTCGTAATGAGT
SILVA_123_SSURef_tax_silva.fasta.gz	Bacteria;Proteobacteria;Epsilonproteobacteria;Campylobacterales;Helicobacteraceae;Helicobacter
SILVA_123_SSURef_tax_silva_full_align_trunc.fasta.gz	Bacteria;Proteobacteria;Epsilonproteobacteria;Campylobacterales;Helicobacteraceae;Helicobacter
SILVA_128_SSURef_tax_silva.fasta.gz	Bacteria;Proteobacteria;Epsilonproteobacteria;Campylobacterales;Helicobacteraceae;Helicobacter
SILVA_128_SSURef_tax_silva_full_align_trunc.fasta.gz	Bacteria;Proteobacteria;Epsilonproteobacteria;Campylobacterales;Helicobacteraceae;Helicobacter
SILVA_132_SSURef_tax_silva.fasta.gz	Bacteria;Epsilonbacteraeota;Campylobacteria;Campylobacterales;Helicobacteraceae;Helicobacter
SILVA_132_SSURef_tax_silva_full_align_trunc.fasta.gz	Bacteria;Epsilonbacteraeota;Campylobacteria;Campylobacterales;Helicobacteraceae;Helicobacter
bac_ssu_r86.1_20180911.fna.gz	Bacteria;Campylobacterota;Campylobacteria;Campylobacterales;Helicobacteraceae;Helicobacter
33	TACGTAGGTGGCAAGCGTTATCCGGAATTATTGGGCGTAAAGCGCGCGTAGGCGGTTTTTTAAGTCTGAT_CCTGTTTGATCCCCACGCTTTCGCACATCAGCGTCAGTTACAGACCAGAAAGTCGCCTTCGCTACTGGTG
SILVA_123_SSURef_tax_silva.fasta.gz	Bacteria;Firmicutes;Bacilli;Bacillales;Staphylococcaceae;Staphylococcus
SILVA_123_SSURef_tax_silva_full_align_trunc.fasta.gz	Bacteria;Firmicutes;Bacilli;Bacillales;Staphylococcaceae;Staphylococcus
SILVA_128_SSURef_tax_silva.fasta.gz	Bacteria;Firmicutes;Bacilli;Bacillales;Staphylococcaceae;Staphylococcus
SILVA_128_SSURef_tax_silva_full_align_trunc.fasta.gz	Bacteria;Firmicutes;Bacilli;Bacillales;Staphylococcaceae;Staphylococcus
SILVA_132_SSURef_tax_silva.fasta.gz	Bacteria;Firmicutes;Bacilli;Bacillales;Staphylococcaceae;Staphylococcus
SILVA_132_SSURef_tax_silva_full_align_trunc.fasta.gz	Bacteria;Firmicutes;Bacilli;Bacillales;Staphylococcaceae;Staphylococcus
bac_ssu_r86.1_20180911.fna.gz	Bacteria;Firmicutes;Bacilli;Staphylococcales;Staphylococcaceae;Staphylococcus
34	TACGTAGGTGGCAAGCGTTATCCGGAATTATTGGGCGTAAAGCGCGCGCAGGTGGTTTCTTAAGTCTGAT_CCTGTTTGCTCCCCACGCTTTCGCGCCTCAGTGTCAGTTACAGACCAGAAAGTCGCCTTCGCCACTGGTG
SILVA_123_SSURef_tax_silva.fasta.gz	Bacteria;Firmicutes;Bacilli;Bacillales;Bacillaceae;Bacillus
SILVA_123_SSURef_tax_silva_full_align_trunc.fasta.gz	Bacteria;Firmicutes;Bacilli;Bacillales;Bacillaceae;Bacillus
SILVA_128_SSURef_tax_silva.fasta.gz	Bacteria;Firmicutes;Bacilli;Bacillales;Bacillaceae;Bacillus
SILVA_128_SSURef_tax_silva_full_align_trunc.fasta.gz	Bacteria;Firmicutes;Bacilli;Bacillales;Bacillaceae;Bacillus
SILVA_132_SSURef_tax_silva.fasta.gz	Bacteria;Firmicutes;Bacilli;Bacillales;Bacillaceae;Bacillus
SILVA_132_SSURef_tax_silva_full_align_trunc.fasta.gz	Bacteria;Firmicutes;Bacilli;Bacillales;Bacillaceae;Bacillus
bac_ssu_r86.1_20180911.fna.gz	Bacteria;Firmicutes;Bacilli;Bacillales;Bacillaceae_G;Bacillus_A
35	TACGTAGGTGGCAAGCGTTGTCCGGATTTATTGGGCGTAAAGCGAGTGCAGGCGGTTCAATAAGTCTGAT_CCTGTTCGCTACCCATGCTTTCGAGCCTCAGCGTCAGTTGCAGACCAGAGAGCCGCCTTCGCCACTGGTG
SILVA_123_SSURef_tax_silva.fasta.gz	Bacteria;Firmicutes;Bacilli;Lactobacillales;Lactobacillaceae;Lactobacillus
SILVA_123_SSURef_tax_silva_full_align_trunc.fasta.gz	Bacteria;Firmicutes;Bacilli;Lactobacillales;Lactobacillaceae;Lactobacillus
SILVA_128_SSURef_tax_silva.fasta.gz	Bacteria;Firmicutes;Bacilli;Lactobacillales;Lactobacillaceae;Lactobacillus
SILVA_128_SSURef_tax_silva_full_align_trunc.fasta.gz	Bacteria;Firmicutes;Bacilli;Lactobacillales;Lactobacillaceae;Lactobacillus
SILVA_132_SSURef_tax_silva.fasta.gz	Bacteria;Firmicutes;Bacilli;Lactobacillales;Lactobacillaceae;Lactobacillus
SILVA_132_SSURef_tax_silva_full_align_trunc.fasta.gz	Bacteria;Firmicutes;Bacilli;Lactobacillales;Lactobacillaceae;Lactobacillus
bac_ssu_r86.1_20180911.fna.gz	Bacteria;Firmicutes;Bacilli;Lactobacillales;Lactobacillaceae;Lactobacillus
36	TACGTAGGTGGCAAGCGTTATCCGGAATTATTGGGCGTAAAGCGCGCGTAGGCGGTTTTTTAAGTCTGAT_CCTGTTTGCTCCCCACGCTTTCGCACATCAGCGTCAGTTACAGACCAGAAAGTCGCCTTCGCCACTGGTG
SILVA_123_SSURef_tax_silva.fasta.gz	Bacteria;Firmicutes;Bacilli;Bacillales;Staphylococcaceae;Staphylococcus
SILVA_123_SSURef_tax_silva_full_align_trunc.fasta.gz	Bacteria;Firmicutes;Bacilli;Bacillales;Staphylococcaceae;Staphylococcus
SILVA_128_SSURef_tax_silva.fasta.gz	Bacteria;Firmicutes;Bacilli;Bacillales;Staphylococcaceae;Staphylococcus
SILVA_128_SSURef_tax_silva_full_align_trunc.fasta.gz	Bacteria;Firmicutes;Bacilli;Bacillales;Staphylococcaceae;Staphylococcus
SILVA_132_SSURef_tax_silva.fasta.gz	Bacteria;Firmicutes;Bacilli;Bacillales;Staphylococcaceae;Staphylococcus
SILVA_132_SSURef_tax_silva_full_align_trunc.fasta.gz	Bacteria;Firmicutes;Bacilli;Bacillales;Staphylococcaceae;Staphylococcus
bac_ssu_r86.1_20180911.fna.gz	Bacteria;Firmicutes;Bacilli;Staphylococcales;Staphylococcaceae;Staphylococcus
37	TACGTAGGGCGCGAGCGNTGTCCGGAATTATTGGGCGTAAAGGGCTTGTAGGCGGTTGGTCGCGTCTGCC_CCTGTTCGCTCCCCACGCTTTCGCTCCTCAGCGTCAGTAACGGCCCAGAGACCCGCCTTCGCCACCGGTG
SILVA_123_SSURef_tax_silva.fasta.gz	Bacteria;Actinobacteria;Actinobacteria;Actinomycetales;Actinomycetaceae;Actinomyces
SILVA_123_SSURef_tax_silva_full_align_trunc.fasta.gz	Bacteria;Actinobacteria;Actinobacteria;Actinomycetales;Actinomycetaceae;Actinomyces
SILVA_128_SSURef_tax_silva.fasta.gz	Bacteria;Actinobacteria;Actinobacteria;Actinomycetales;Actinomycetaceae;Actinomyces
SILVA_128_SSURef_tax_silva_full_align_trunc.fasta.gz	Bacteria;Actinobacteria;Actinobacteria;Actinomycetales;Actinomycetaceae;Actinomyces
SILVA_132_SSURef_tax_silva.fasta.gz	Bacteria;Actinobacteria;Actinobacteria;Actinomycetales;Actinomycetaceae;Actinomyces
SILVA_132_SSURef_tax_silva_full_align_trunc.fasta.gz	Bacteria;Actinobacteria;Actinobacteria;Actinomycetales;Actinomycetaceae;Actinomyces
bac_ssu_r86.1_20180911.fna.gz	Bacteria;Actinobacteriota;Actinobacteria;Actinomycetales;Actinomycetaceae;Actinomyces_B
38	TACGTAGGTCCCGAGCGTTGTCCGGATTTATTGGGCGTAAAGGGAGCGCAGGCGGTCAGGAAAGTCTGGA_CCTGTTCGCTACCCACGCTTTCGAGCCTCAGCGTCAGTGACAGACCAGAGAGCCGCTTTCGCTACTGGTG
SILVA_123_SSURef_tax_silva.fasta.gz	Bacteria;Firmicutes;Bacilli;Lactobacillales;Streptococcaceae;Streptococcus
SILVA_123_SSURef_tax_silva_full_align_trunc.fasta.gz	Bacteria;Firmicutes;Bacilli;Lactobacillales;Streptococcaceae;Streptococcus
SILVA_128_SSURef_tax_silva.fasta.gz	Bacteria;Firmicutes;Bacilli;Lactobacillales;Streptococcaceae;Streptococcus
SILVA_128_SSURef_tax_silva_full_align_trunc.fasta.gz	Bacteria;Firmicutes;Bacilli;Lactobacillales;Streptococcaceae;Streptococcus
SILVA_132_SSURef_tax_silva.fasta.gz	Bacteria;Firmicutes;Bacilli;Lactobacillales;Streptococcaceae;Streptococcus
SILVA_132_SSURef_tax_silva_full_align_trunc.fasta.gz	Bacteria;Firmicutes;Bacilli;Lactobacillales;Streptococcaceae;Streptococcus
bac_ssu_r86.1_20180911.fna.gz	Bacteria;Firmicutes;Bacilli;Lactobacillales;Streptococcaceae;Streptococcus
39	TACGTAGGTCCCGAGCGTTGTCCGGATTTATTGGGCGTAAAGGGAGCGCAGGCGGTCAGGAAAGTCTGGA_CCTGTTCGCTACCCACGCTTTCGAGCCTCAGCGTCAGTGACAGACCAGAGAGCCGCTTTCGCCACTGGTG
SILVA_123_SSURef_tax_silva.fasta.gz	Bacteria;Firmicutes;Bacilli;Lactobacillales;Streptococcaceae;Streptococcus
SILVA_123_SSURef_tax_silva_full_align_trunc.fasta.gz	Bacteria;Firmicutes;Bacilli;Lactobacillales;Streptococcaceae;Streptococcus
SILVA_128_SSURef_tax_silva.fasta.gz	Bacteria;Firmicutes;Bacilli;Lactobacillales;Streptococcaceae;Streptococcus
SILVA_128_SSURef_tax_silva_full_align_trunc.fasta.gz	Bacteria;Firmicutes;Bacilli;Lactobacillales;Streptococcaceae;Streptococcus
SILVA_132_SSURef_tax_silva.fasta.gz	Bacteria;Firmicutes;Bacilli;Lactobacillales;Streptococcaceae;Streptococcus
SILVA_132_SSURef_tax_silva_full_align_trunc.fasta.gz	Bacteria;Firmicutes;Bacilli;Lactobacillales;Streptococcaceae;Streptococcus
bac_ssu_r86.1_20180911.fna.gz	Bacteria;Firmicutes;Bacilli;Lactobacillales;Streptococcaceae;Streptococcus
40	TACCGAGGGTGCGAGCGNTAATCGGATTTACTGGGCGTAAAGCGTGCGTAGGCGGCTTATTAAGTCGGAT_CCTGTTTGCTCCCCATGCTTTCGTACCTCAGCGTCAGTATTAGGCCAGATGGCTGCCTTCGCCATCGGTA
SILVA_123_SSURef_tax_silva.fasta.gz	Bacteria;Proteobacteria;Gammaproteobacteria;Pseudomonadales;Moraxellaceae;Acinetobacter
SILVA_123_SSURef_tax_silva_full_align_trunc.fasta.gz	Bacteria;Proteobacteria;Gammaproteobacteria;Pseudomonadales;Moraxellaceae;Acinetobacter
SILVA_128_SSURef_tax_silva.fasta.gz	Bacteria;Proteobacteria;Gammaproteobacteria;Pseudomonadales;Moraxellaceae;Acinetobacter
SILVA_128_SSURef_tax_silva_full_align_trunc.fasta.gz	Bacteria;Proteobacteria;Gammaproteobacteria;Pseudomonadales;Moraxellaceae;Acinetobacter
SILVA_132_SSURef_tax_silva.fasta.gz	Bacteria;Proteobacteria;Gammaproteobacteria;Pseudomonadales;Moraxellaceae;Acinetobacter
SILVA_132_SSURef_tax_silva_full_align_trunc.fasta.gz	Bacteria;Proteobacteria;Gammaproteobacteria;Pseudomonadales;Moraxellaceae;Acinetobacter
bac_ssu_r86.1_20180911.fna.gz	Bacteria;Proteobacteria;Gammaproteobacteria;Pseudomonadales;Moraxellaceae;Acinetobacter
41	TACGTAGGTCCCGAGCGNTGTCCGGATTTATTGGGCGTAAAGGGAGCGCAGGCGGTCAGGAAAGTCTGGA_CCTGTTCGCTACCCACGCTTTCGAGCCTCAGCGTCAGTGACAGACCAGAGAGCCGCTTTCGCCACTGGTG
SILVA_123_SSURef_tax_silva.fasta.gz	Bacteria;Firmicutes;Bacilli;Lactobacillales;Streptococcaceae;Streptococcus
SILVA_123_SSURef_tax_silva_full_align_trunc.fasta.gz	Bacteria;Firmicutes;Bacilli;Lactobacillales;Streptococcaceae;Streptococcus
SILVA_128_SSURef_tax_silva.fasta.gz	Bacteria;Firmicutes;Bacilli;Lactobacillales;Streptococcaceae;Streptococcus
SILVA_128_SSURef_tax_silva_full_align_trunc.fasta.gz	Bacteria;Firmicutes;Bacilli;Lactobacillales;Streptococcaceae;Streptococcus
SILVA_132_SSURef_tax_silva.fasta.gz	Bacteria;Firmicutes;Bacilli;Lactobacillales;Streptococcaceae;Streptococcus
SILVA_132_SSURef_tax_silva_full_align_trunc.fasta.gz	Bacteria;Firmicutes;Bacilli;Lactobacillales;Streptococcaceae;Streptococcus
bac_ssu_r86.1_20180911.fna.gz	Bacteria;Firmicutes;Bacilli;Lactobacillales;Streptococcaceae;Streptococcus
42	TACGGAGGGTGCAAGCGTTACTCGGAATCACTGGGCGTAAAGAGCGCGTAGGCGGGATAGTCAGTCAGGT_CCTGTTTGCTCCCCACGCTTTCGCGCAATCAGCGTCAGTAATGTTCCAGCAGGCCGCCTTCGCAATGAGT
SILVA_123_SSURef_tax_silva.fasta.gz	Bacteria;Proteobacteria;Epsilonproteobacteria;Campylobacterales;Helicobacteraceae;Helicobacter
SILVA_123_SSURef_tax_silva_full_align_trunc.fasta.gz	Bacteria;Proteobacteria;Epsilonproteobacteria;Campylobacterales;Helicobacteraceae;Helicobacter
SILVA_128_SSURef_tax_silva.fasta.gz	Bacteria;Proteobacteria;Epsilonproteobacteria;Campylobacterales;Helicobacteraceae;Helicobacter
SILVA_128_SSURef_tax_silva_full_align_trunc.fasta.gz	Bacteria;Proteobacteria;Epsilonproteobacteria;Campylobacterales;Helicobacteraceae;Helicobacter
SILVA_132_SSURef_tax_silva.fasta.gz	Bacteria;Epsilonbacteraeota;Campylobacteria;Campylobacterales;Helicobacteraceae;Helicobacter
SILVA_132_SSURef_tax_silva_full_align_trunc.fasta.gz	Bacteria;Epsilonbacteraeota;Campylobacteria;Campylobacterales;Helicobacteraceae;Helicobacter
bac_ssu_r86.1_20180911.fna.gz	Bacteria;Campylobacterota;Campylobacteria;Campylobacterales;Helicobacteraceae;Helicobacter
43	TACGTAGGGCGCGAGCGTTGTCCGGAATTATTGGGCGTAAAGGGCTTGTAGGCGGTTGGTCGCGTCTGCC_CCTGTTCGCTCCCCACGCTTTCGCTCCTCAGCGTCAGTAACGGCCCAGAGACCCGCCTTCGCCACCGGTG
SILVA_123_SSURef_tax_silva.fasta.gz	Bacteria;Actinobacteria;Actinobacteria;Actinomycetales;Actinomycetaceae;Actinomyces
SILVA_123_SSURef_tax_silva_full_align_trunc.fasta.gz	Bacteria;Actinobacteria;Actinobacteria;Actinomycetales;Actinomycetaceae;Actinomyces
SILVA_128_SSURef_tax_silva.fasta.gz	Bacteria;Actinobacteria;Actinobacteria;Actinomycetales;Actinomycetaceae;Actinomyces
SILVA_128_SSURef_tax_silva_full_align_trunc.fasta.gz	Bacteria;Actinobacteria;Actinobacteria;Actinomycetales;Actinomycetaceae;Actinomyces
SILVA_132_SSURef_tax_silva.fasta.gz	Bacteria;Actinobacteria;Actinobacteria;Actinomycetales;Actinomycetaceae;Actinomyces
SILVA_132_SSURef_tax_silva_full_align_trunc.fasta.gz	Bacteria;Actinobacteria;Actinobacteria;Actinomycetales;Actinomycetaceae;Actinomyces
bac_ssu_r86.1_20180911.fna.gz	Bacteria;Actinobacteriota;Actinobacteria;Actinomycetales;Actinomycetaceae;Actinomyces_B
44	TACGGAGGGTGCAAGCGTTAATCGGAATTACTGGGCGTAAAGCGCACGCAGGCGGTTTGTTAAGTCAGAT_TTTAACCTTGCGGCCGTACTCCCCAGGCGGTCGACTTAACGCGTTAGCTCCGGAAGCCACGCCTCAAGGG
SILVA_123_SSURef_tax_silva.fasta.gz	Bacteria;Proteobacteria;Gammaproteobacteria;Enterobacteriales
SILVA_123_SSURef_tax_silva.fasta.gz
SILVA_128_SSURef_tax_silva.fasta.gz	Bacteria;Proteobacteria;Gammaproteobacteria;Enterobacteriales
SILVA_128_SSURef_tax_silva.fasta.gz
SILVA_132_SSURef_tax_silva.fasta.gz	Bacteria;Proteobacteria;Gammaproteobacteria;Enterobacteriales
SILVA_132_SSURef_tax_silva.fasta.gz
SILVA_132_SSURef_tax_silva.fasta.gz
45	TACGGAGGATCCGAGCGNTATCCGGATTTATTGGGTTTAAAGGGAGCGTAGATGGATGTTTAAGTCAGTT_CCTGTTTGATACCCACACTTTCGAGCCTCAATGTCAGTTGCAGCTTAGCAGGCTGCCTTCGCAATCGGAG
SILVA_123_SSURef_tax_silva.fasta.gz	Bacteria;Bacteroidetes;Bacteroidia;Bacteroidales;Bacteroidaceae;Bacteroides
SILVA_123_SSURef_tax_silva_full_align_trunc.fasta.gz	Bacteria;Bacteroidetes;Bacteroidia;Bacteroidales;Bacteroidaceae;Bacteroides
SILVA_128_SSURef_tax_silva.fasta.gz	Bacteria;Bacteroidetes;Bacteroidia;Bacteroidales;Bacteroidaceae;Bacteroides
SILVA_128_SSURef_tax_silva_full_align_trunc.fasta.gz	Bacteria;Bacteroidetes;Bacteroidia;Bacteroidales;Bacteroidaceae;Bacteroides
SILVA_132_SSURef_tax_silva.fasta.gz	Bacteria;Bacteroidetes;Bacteroidia;Bacteroidales;Bacteroidaceae;Bacteroides
SILVA_132_SSURef_tax_silva_full_align_trunc.fasta.gz	Bacteria;Bacteroidetes;Bacteroidia;Bacteroidales;Bacteroidaceae;Bacteroides
bac_ssu_r86.1_20180911.fna.gz	Bacteria;Bacteroidota
46	TACGTAGGTGGCAAGCGTTATCCGGAATTATTGGGCGTAAAGCGCGCGTAGGCGGTTTTTTAAGTCTGAT_CCTGTTTGATCCCCACGCTTTCGCACATCAGCGTCAGTTACAGACCAGAAAGTCGCCTTCGCCCCTGGTG
SILVA_123_SSURef_tax_silva.fasta.gz	Bacteria;Firmicutes;Bacilli;Bacillales;Staphylococcaceae;Staphylococcus
SILVA_123_SSURef_tax_silva_full_align_trunc.fasta.gz	Bacteria;Firmicutes;Bacilli;Bacillales;Staphylococcaceae;Staphylococcus
SILVA_128_SSURef_tax_silva.fasta.gz	Bacteria;Firmicutes;Bacilli;Bacillales;Staphylococcaceae;Staphylococcus
SILVA_128_SSURef_tax_silva_full_align_trunc.fasta.gz	Bacteria;Firmicutes;Bacilli;Bacillales;Staphylococcaceae;Staphylococcus
SILVA_132_SSURef_tax_silva.fasta.gz	Bacteria;Firmicutes;Bacilli;Bacillales;Staphylococcaceae;Staphylococcus
SILVA_132_SSURef_tax_silva_full_align_trunc.fasta.gz	Bacteria;Firmicutes;Bacilli;Bacillales;Staphylococcaceae;Staphylococcus
bac_ssu_r86.1_20180911.fna.gz	Bacteria;Firmicutes;Bacilli;Staphylococcales;Staphylococcaceae;Staphylococcus
47	TACGTAGGTGGCAAGCGNTATCCGGAATTATTGGGCGTAAAGCGCGCGTAGGCGGTTTTTTAAGTCTGAT_CCTGTTTGATCCCCACGCTTTCGCACATCAGCGTCAGTTACAGACCAGAAAGTCGCCTTCGCCACTGGTG
SILVA_123_SSURef_tax_silva.fasta.gz	Bacteria;Firmicutes;Bacilli;Bacillales;Staphylococcaceae;Staphylococcus
SILVA_123_SSURef_tax_silva_full_align_trunc.fasta.gz	Bacteria;Firmicutes;Bacilli;Bacillales;Staphylococcaceae;Staphylococcus
SILVA_128_SSURef_tax_silva.fasta.gz	Bacteria;Firmicutes;Bacilli;Bacillales;Staphylococcaceae;Staphylococcus
SILVA_128_SSURef_tax_silva_full_align_trunc.fasta.gz	Bacteria;Firmicutes;Bacilli;Bacillales;Staphylococcaceae;Staphylococcus
SILVA_132_SSURef_tax_silva.fasta.gz	Bacteria;Firmicutes;Bacilli;Bacillales;Staphylococcaceae;Staphylococcus
SILVA_132_SSURef_tax_silva_full_align_trunc.fasta.gz	Bacteria;Firmicutes;Bacilli;Bacillales;Staphylococcaceae;Staphylococcus
bac_ssu_r86.1_20180911.fna.gz	Bacteria;Firmicutes;Bacilli;Staphylococcales;Staphylococcaceae;Staphylococcus
48	TACGTAGGGTGCGAGCGNTAATCGGAATTACTGGGCGTAAAGCGGGCGCAGACGGTTACTTAAGCAGGAT_CCTGTTTGCTACCCACGCTTTCGGGCATGAACGTCAGTGTTGTCCCAGGAGGCTGCCTTCGCCATCGGTA
SILVA_123_SSURef_tax_silva.fasta.gz	Bacteria;Proteobacteria;Betaproteobacteria;Neisseriales;Neisseriaceae;Neisseria
SILVA_123_SSURef_tax_silva_full_align_trunc.fasta.gz	Bacteria;Proteobacteria;Betaproteobacteria;Neisseriales;Neisseriaceae;Neisseria
SILVA_128_SSURef_tax_silva.fasta.gz	Bacteria;Proteobacteria;Betaproteobacteria;Neisseriales;Neisseriaceae;Neisseria
SILVA_128_SSURef_tax_silva_full_align_trunc.fasta.gz	Bacteria;Proteobacteria;Betaproteobacteria;Neisseriales;Neisseriaceae;Neisseria
SILVA_132_SSURef_tax_silva.fasta.gz	Bacteria;Proteobacteria;Gammaproteobacteria;Betaproteobacteriales;Neisseriaceae;Neisseria
SILVA_132_SSURef_tax_silva_full_align_trunc.fasta.gz	Bacteria;Proteobacteria;Gammaproteobacteria;Betaproteobacteriales;Neisseriaceae;Neisseria
bac_ssu_r86.1_20180911.fna.gz	Bacteria;Proteobacteria;Gammaproteobacteria;Betaproteobacteriales;Neisseriaceae;Neisseria
49	TACGTAGGTGGCAAGCGTTATCCGGAATTATTGGGCGTAAAGCGCGCGTAGGCGGTTTTTTAAGTCTGAT_CCTGTTTGATCCCCACGCTTTCGCACATCAGCGTCAGTTACAGACCAGAAAGTCGCCTTCGCCACTGGTG
SILVA_123_SSURef_tax_silva.fasta.gz	Bacteria;Firmicutes;Bacilli;Bacillales;Staphylococcaceae;Staphylococcus
SILVA_123_SSURef_tax_silva_full_align_trunc.fasta.gz	Bacteria;Firmicutes;Bacilli;Bacillales;Staphylococcaceae;Staphylococcus
SILVA_128_SSURef_tax_silva.fasta.gz	Bacteria;Firmicutes;Bacilli;Bacillales;Staphylococcaceae;Staphylococcus
SILVA_128_SSURef_tax_silva_full_align_trunc.fasta.gz	Bacteria;Firmicutes;Bacilli;Bacillales;Staphylococcaceae;Staphylococcus
SILVA_132_SSURef_tax_silva.fasta.gz	Bacteria;Firmicutes;Bacilli;Bacillales;Staphylococcaceae;Staphylococcus
SILVA_132_SSURef_tax_silva_full_align_trunc.fasta.gz	Bacteria;Firmicutes;Bacilli;Bacillales;Staphylococcaceae;Staphylococcus
bac_ssu_r86.1_20180911.fna.gz	Bacteria;Firmicutes;Bacilli;Staphylococcales;Staphylococcaceae;Staphylococcus
50	TACGGAGGGTGCAAGCGTTACTCGGAATCACTGGGCGTAAAGAGCGCGTAGGCGGGATAGTCAGTCAGGT_CCTGTTTGCTCCCCACGCTTTCGCGCAATCAGCGTCAGTAATGTTCCAGCAGGTCGCCTTCGCAATGAGT
SILVA_123_SSURef_tax_silva.fasta.gz	Bacteria;Proteobacteria;Epsilonproteobacteria;Campylobacterales;Helicobacteraceae;Helicobacter
SILVA_123_SSURef_tax_silva_full_align_trunc.fasta.gz	Bacteria;Proteobacteria;Epsilonproteobacteria;Campylobacterales;Helicobacteraceae;Helicobacter
SILVA_128_SSURef_tax_silva.fasta.gz	Bacteria;Proteobacteria;Epsilonproteobacteria;Campylobacterales;Helicobacteraceae;Helicobacter
SILVA_128_SSURef_tax_silva_full_align_trunc.fasta.gz	Bacteria;Proteobacteria;Epsilonproteobacteria;Campylobacterales;Helicobacteraceae;Helicobacter
SILVA_132_SSURef_tax_silva.fasta.gz	Bacteria;Epsilonbacteraeota;Campylobacteria;Campylobacterales;Helicobacteraceae;Helicobacter
SILVA_132_SSURef_tax_silva_full_align_trunc.fasta.gz	Bacteria;Epsilonbacteraeota;Campylobacteria;Campylobacterales;Helicobacteraceae;Helicobacter
bac_ssu_r86.1_20180911.fna.gz	Bacteria;Campylobacterota;Campylobacteria;Campylobacterales;Helicobacteraceae;Helicobacter
51	TACGGAGGGTGCAAGCGNTAATCGGAATTACTGGGCGTAAAGCGCACGCAGGCGGTTTGTTAAGTCAGAT_CCTGTTTGCTCCCCACGCTTTCGCACCTGAGCGTCAGTCTTCGTCCAGGGGGCCGCCTTCGCCACCGGTA
SILVA_123_SSURef_tax_silva.fasta.gz	Bacteria;Proteobacteria;Gammaproteobacteria;Enterobacteriales;Enterobacteriaceae
SILVA_123_SSURef_tax_silva_full_align_trunc.fasta.gz	Bacteria;Proteobacteria;Gammaproteobacteria;Enterobacteriales;Enterobacteriaceae
SILVA_128_SSURef_tax_silva.fasta.gz	Bacteria;Proteobacteria;Gammaproteobacteria;Enterobacteriales;Enterobacteriaceae
SILVA_128_SSURef_tax_silva_full_align_trunc.fasta.gz	Bacteria;Proteobacteria;Gammaproteobacteria;Enterobacteriales;Enterobacteriaceae
SILVA_132_SSURef_tax_silva.fasta.gz	Bacteria;Proteobacteria;Gammaproteobacteria;Enterobacteriales;Enterobacteriaceae
SILVA_132_SSURef_tax_silva_full_align_trunc.fasta.gz	Bacteria;Proteobacteria;Gammaproteobacteria;Enterobacteriales;Enterobacteriaceae
bac_ssu_r86.1_20180911.fna.gz	Bacteria;Proteobacteria;Gammaproteobacteria;Enterobacterales;Enterobacteriaceae
52	TACGTAGGTGGCAAGCGTTGTCCGGATTTATTGGGCGTAAAGCGCGCGCAGGCGGTCTTTTAAGTCTGAT_CCTGTTTGCTCCCCACGCTTTCGCGCCTCAGCGTCAGTTACAGACCAGAGAGTCGCCTTCGCCACTGGTG
SILVA_123_SSURef_tax_silva.fasta.gz	Bacteria;Firmicutes;Bacilli;Bacillales;Listeriaceae;Listeria
SILVA_123_SSURef_tax_silva_full_align_trunc.fasta.gz	Bacteria;Firmicutes;Bacilli;Bacillales;Listeriaceae;Listeria
SILVA_128_SSURef_tax_silva.fasta.gz	Bacteria;Firmicutes;Bacilli;Bacillales;Listeriaceae;Listeria
SILVA_128_SSURef_tax_silva_full_align_trunc.fasta.gz	Bacteria;Firmicutes;Bacilli;Bacillales;Listeriaceae;Listeria
SILVA_132_SSURef_tax_silva.fasta.gz	Bacteria;Firmicutes;Bacilli;Bacillales;Listeriaceae;Listeria
SILVA_132_SSURef_tax_silva_full_align_trunc.fasta.gz	Bacteria;Firmicutes;Bacilli;Bacillales;Listeriaceae;Listeria
bac_ssu_r86.1_20180911.fna.gz	Bacteria;Firmicutes;Bacilli;Lactobacillales;Listeriaceae;Listeria
53	TACGTAGGTCCCGAGCGTTGTCCGGATTTATTGGGCGTAAAGCGAGCGCAGGCGGTTAGATAAGTCTGAA_CCTGTTTGCTCCCCACGCTTTCGAGCCTCAGCGTCAGTTACAAGCCAGAGAGCCGCTTTCGCCACCGGTG
SILVA_123_SSURef_tax_silva.fasta.gz	Bacteria;Firmicutes;Bacilli;Lactobacillales;Streptococcaceae;Streptococcus
SILVA_123_SSURef_tax_silva_full_align_trunc.fasta.gz	Bacteria;Firmicutes;Bacilli;Lactobacillales;Streptococcaceae;Streptococcus
SILVA_128_SSURef_tax_silva.fasta.gz	Bacteria;Firmicutes;Bacilli;Lactobacillales;Streptococcaceae;Streptococcus
SILVA_128_SSURef_tax_silva_full_align_trunc.fasta.gz	Bacteria;Firmicutes;Bacilli;Lactobacillales;Streptococcaceae;Streptococcus
SILVA_132_SSURef_tax_silva.fasta.gz	Bacteria;Firmicutes;Bacilli;Lactobacillales;Streptococcaceae;Streptococcus
SILVA_132_SSURef_tax_silva_full_align_trunc.fasta.gz	Bacteria;Firmicutes;Bacilli;Lactobacillales;Streptococcaceae;Streptococcus
bac_ssu_r86.1_20180911.fna.gz	Bacteria;Firmicutes;Bacilli;Lactobacillales;Streptococcaceae;Streptococcus
54	TACGGAGGGGGCTAGCGNTATTCGGAATTACTGGGCGTAAAGCGCACGTAGGCGGATCGGAAAGTCAGAG_CCTGTTTGCTCCCCACGCTTTCGCACCTCAGCGTCAGTATCGAGCCAGTGAGCCGCCTTCGCCACTGGTG
SILVA_123_SSURef_tax_silva.fasta.gz	Bacteria;Proteobacteria;Alphaproteobacteria;Rhodobacterales;Rhodobacteraceae;Rhodobacter
SILVA_123_SSURef_tax_silva_full_align_trunc.fasta.gz	Bacteria;Proteobacteria;Alphaproteobacteria;Rhodobacterales;Rhodobacteraceae;Rhodobacter
SILVA_128_SSURef_tax_silva.fasta.gz	Bacteria;Proteobacteria;Alphaproteobacteria;Rhodobacterales;Rhodobacteraceae;Rhodobacter
SILVA_128_SSURef_tax_silva_full_align_trunc.fasta.gz	Bacteria;Proteobacteria;Alphaproteobacteria;Rhodobacterales;Rhodobacteraceae;Rhodobacter
SILVA_132_SSURef_tax_silva.fasta.gz	Bacteria;Proteobacteria;Alphaproteobacteria;Rhodobacterales;Rhodobacteraceae;Rhodobacter
SILVA_132_SSURef_tax_silva_full_align_trunc.fasta.gz	Bacteria;Proteobacteria;Alphaproteobacteria;Rhodobacterales;Rhodobacteraceae;Rhodobacter
bac_ssu_r86.1_20180911.fna.gz	Bacteria;Proteobacteria;Alphaproteobacteria;Rhodobacterales;Rhodobacteraceae;Rhodobacter_A
55	TACGTAGGGCGCGAGCGTTGTCCGGAATTATTGGGCGTAAAGGGCTTGTAGGCGGTTGGTCGCGTCTGCC_CCTGTTCGCTCCCCACGCTTTCGCTCCTCAGCGTCAGTAACGGCCCAGAGACCCGCCTTCGCTACCGGTG
SILVA_123_SSURef_tax_silva.fasta.gz	Bacteria;Actinobacteria;Actinobacteria;Actinomycetales;Actinomycetaceae;Actinomyces
SILVA_123_SSURef_tax_silva_full_align_trunc.fasta.gz	Bacteria;Actinobacteria;Actinobacteria;Actinomycetales;Actinomycetaceae;Actinomyces
SILVA_128_SSURef_tax_silva.fasta.gz	Bacteria;Actinobacteria;Actinobacteria;Actinomycetales;Actinomycetaceae;Actinomyces
SILVA_128_SSURef_tax_silva_full_align_trunc.fasta.gz	Bacteria;Actinobacteria;Actinobacteria;Actinomycetales;Actinomycetaceae;Actinomyces
SILVA_132_SSURef_tax_silva.fasta.gz	Bacteria;Actinobacteria;Actinobacteria;Actinomycetales;Actinomycetaceae;Actinomyces
SILVA_132_SSURef_tax_silva_full_align_trunc.fasta.gz	Bacteria;Actinobacteria;Actinobacteria;Actinomycetales;Actinomycetaceae;Actinomyces
bac_ssu_r86.1_20180911.fna.gz	Bacteria;Actinobacteriota;Actinobacteria;Actinomycetales;Actinomycetaceae;Actinomyces_B
56	TACGGAGGATCCGAGCGTTATCCGGATTTATTGGGTTTAAAGGGAGCGTAGATGGATATTTAAGTCAGTT_CCTGTTTGATACCCACACTTTCGAGCCTCAATGTCAGTTGCAGCTTAGCAGGCTGCCTTCGCAATCGGAG
SILVA_123_SSURef_tax_silva.fasta.gz	Bacteria;Bacteroidetes;Bacteroidia;Bacteroidales;Bacteroidaceae;Bacteroides
SILVA_123_SSURef_tax_silva_full_align_trunc.fasta.gz	Bacteria;Bacteroidetes;Bacteroidia;Bacteroidales;Bacteroidaceae;Bacteroides
SILVA_128_SSURef_tax_silva.fasta.gz	Bacteria;Bacteroidetes;Bacteroidia;Bacteroidales;Bacteroidaceae;Bacteroides
SILVA_128_SSURef_tax_silva_full_align_trunc.fasta.gz	Bacteria;Bacteroidetes;Bacteroidia;Bacteroidales;Bacteroidaceae;Bacteroides
SILVA_132_SSURef_tax_silva.fasta.gz	Bacteria;Bacteroidetes;Bacteroidia;Bacteroidales;Bacteroidaceae;Bacteroides
SILVA_132_SSURef_tax_silva_full_align_trunc.fasta.gz	Bacteria;Bacteroidetes;Bacteroidia;Bacteroidales;Bacteroidaceae;Bacteroides
bac_ssu_r86.1_20180911.fna.gz	Bacteria;Bacteroidota
57	TACGAAGGGTGCAAGCGTTAATCGGAATTACTGGGCGTAAAGCGCGCGTAGGTGGTTCAGCAAGTTGGAT_CCTGTTTGCTCCCCACGCTTTCGCACCTCAGTGTCAGTATCAGTCCAGGTGGTCGCCTTCGCCCCTGGTG
SILVA_123_SSURef_tax_silva.fasta.gz	Bacteria;Proteobacteria;Gammaproteobacteria;Pseudomonadales;Pseudomonadaceae;Pseudomonas
SILVA_123_SSURef_tax_silva_full_align_trunc.fasta.gz	Bacteria;Proteobacteria;Gammaproteobacteria;Pseudomonadales;Pseudomonadaceae;Pseudomonas
SILVA_128_SSURef_tax_silva.fasta.gz	Bacteria;Proteobacteria;Gammaproteobacteria;Pseudomonadales;Pseudomonadaceae;Pseudomonas
SILVA_128_SSURef_tax_silva_full_align_trunc.fasta.gz	Bacteria;Proteobacteria;Gammaproteobacteria;Pseudomonadales;Pseudomonadaceae;Pseudomonas
SILVA_132_SSURef_tax_silva.fasta.gz	Bacteria;Proteobacteria;Gammaproteobacteria;Pseudomonadales;Pseudomonadaceae;Pseudomonas
SILVA_132_SSURef_tax_silva_full_align_trunc.fasta.gz	Bacteria;Proteobacteria;Gammaproteobacteria;Pseudomonadales;Pseudomonadaceae;Pseudomonas
bac_ssu_r86.1_20180911.fna.gz	Bacteria;Proteobacteria;Gammaproteobacteria;Pseudomonadales;Pseudomonadaceae
58	TACGTAGGTCCCGAGCGTTGTCCGGATTTATTGGGCGTAAAGCGAGCGCAGGCGGTTCTTTAAGTCTGAA_CCTGTTTGCTCCCCACGCTTTCGAGCCTCAGCGTCAGTTACAGACCAGAGAGCCGCTTTCGCTACCGGTG
SILVA_123_SSURef_tax_silva.fasta.gz	Bacteria;Firmicutes;Bacilli;Lactobacillales;Streptococcaceae;Streptococcus
SILVA_123_SSURef_tax_silva_full_align_trunc.fasta.gz	Bacteria;Firmicutes;Bacilli;Lactobacillales;Streptococcaceae;Streptococcus
SILVA_128_SSURef_tax_silva.fasta.gz	Bacteria;Firmicutes;Bacilli;Lactobacillales;Streptococcaceae;Streptococcus
SILVA_128_SSURef_tax_silva_full_align_trunc.fasta.gz	Bacteria;Firmicutes;Bacilli;Lactobacillales;Streptococcaceae;Streptococcus
SILVA_132_SSURef_tax_silva.fasta.gz	Bacteria;Firmicutes;Bacilli;Lactobacillales;Streptococcaceae;Streptococcus
SILVA_132_SSURef_tax_silva_full_align_trunc.fasta.gz	Bacteria;Firmicutes;Bacilli;Lactobacillales;Streptococcaceae;Streptococcus
bac_ssu_r86.1_20180911.fna.gz	Bacteria;Firmicutes;Bacilli;Lactobacillales;Streptococcaceae;Streptococcus
59	TACGTAGGGCGCGAGCGTTGTCCGGAATTATTGGGCGTAAAGGGCTTGTAGGCGGTTGGTCGCGTCTGCC_CCTGTTCGCTCCCCACGCTTTCGCTCCTCAGCGTCAGTAACGGCCCAGAGACCCGCCTTCGCCCCCGGTG
SILVA_123_SSURef_tax_silva.fasta.gz	Bacteria;Actinobacteria;Actinobacteria;Actinomycetales;Actinomycetaceae;Actinomyces
SILVA_123_SSURef_tax_silva_full_align_trunc.fasta.gz	Bacteria;Actinobacteria;Actinobacteria;Actinomycetales;Actinomycetaceae;Actinomyces
SILVA_128_SSURef_tax_silva.fasta.gz	Bacteria;Actinobacteria;Actinobacteria;Actinomycetales;Actinomycetaceae;Actinomyces
SILVA_128_SSURef_tax_silva_full_align_trunc.fasta.gz	Bacteria;Actinobacteria;Actinobacteria;Actinomycetales;Actinomycetaceae;Actinomyces
SILVA_132_SSURef_tax_silva.fasta.gz	Bacteria;Actinobacteria;Actinobacteria;Actinomycetales;Actinomycetaceae;Actinomyces
SILVA_132_SSURef_tax_silva_full_align_trunc.fasta.gz	Bacteria;Actinobacteria;Actinobacteria;Actinomycetales;Actinomycetaceae;Actinomyces
bac_ssu_r86.1_20180911.fna.gz	Bacteria;Actinobacteriota;Actinobacteria;Actinomycetales;Actinomycetaceae;Actinomyces_B
60	TACGTAGGTGGCAAGCGTTATCCGGAATTATTGGGCGTAAAGCGCGCGCAGGTGGTTTCTTAAGTCTGAT_CCTGTTTGCTCCCCACGCTTTCGCGCCTCAGTGTCAGTTACAGACCAGAAAGTCGCCTTCGCCCCTGGTG
SILVA_123_SSURef_tax_silva.fasta.gz	Bacteria;Firmicutes;Bacilli;Bacillales;Bacillaceae;Bacillus
SILVA_123_SSURef_tax_silva_full_align_trunc.fasta.gz	Bacteria;Firmicutes;Bacilli;Bacillales;Bacillaceae;Bacillus
SILVA_128_SSURef_tax_silva.fasta.gz	Bacteria;Firmicutes;Bacilli;Bacillales;Bacillaceae;Bacillus
SILVA_128_SSURef_tax_silva_full_align_trunc.fasta.gz	Bacteria;Firmicutes;Bacilli;Bacillales;Bacillaceae;Bacillus
SILVA_132_SSURef_tax_silva.fasta.gz	Bacteria;Firmicutes;Bacilli;Bacillales;Bacillaceae;Bacillus
SILVA_132_SSURef_tax_silva_full_align_trunc.fasta.gz	Bacteria;Firmicutes;Bacilli;Bacillales;Bacillaceae;Bacillus
bac_ssu_r86.1_20180911.fna.gz	Bacteria;Firmicutes;Bacilli;Bacillales;Bacillaceae_G;Bacillus_A
61	TACGTAGGTGGCAAGCGTTGTCCGGATTTATTGGGCGTAAAGCGAGCGCAGGCGGTTTCTTAAGTCTGAT_CCTGTTTGCTCCCCACGCTTTCGAGCCTCAGCGTCAGTTACAGACCAGAGAGCCGCCTTCGCTACTGGTG
SILVA_123_SSURef_tax_silva.fasta.gz	Bacteria;Firmicutes;Bacilli;Lactobacillales;Enterococcaceae;Enterococcus
SILVA_123_SSURef_tax_silva_full_align_trunc.fasta.gz	Bacteria;Firmicutes;Bacilli;Lactobacillales;Enterococcaceae;Enterococcus
SILVA_128_SSURef_tax_silva.fasta.gz	Bacteria;Firmicutes;Bacilli;Lactobacillales;Enterococcaceae;Enterococcus
SILVA_128_SSURef_tax_silva_full_align_trunc.fasta.gz	Bacteria;Firmicutes;Bacilli;Lactobacillales;Enterococcaceae;Enterococcus
SILVA_132_SSURef_tax_silva.fasta.gz	Bacteria;Firmicutes;Bacilli;Lactobacillales;Enterococcaceae;Enterococcus
SILVA_132_SSURef_tax_silva_full_align_trunc.fasta.gz	Bacteria;Firmicutes;Bacilli;Lactobacillales;Enterococcaceae;Enterococcus
bac_ssu_r86.1_20180911.fna.gz	Bacteria;Firmicutes;Bacilli;Lactobacillales;Enterococcaceae
62	TACGAAGGGTGCAAGCGNTAATCGGAATTACTGGGCGTAAAGCGCGCGTAGGTGGTTCAGCAAGTTGGAT_CCTGTTTGCTCCCCACGCTTTCGCACCTCAGTGTCAGTATCAGTCCAGGTGGTCGCCTTCGCCACTGGTG
SILVA_123_SSURef_tax_silva.fasta.gz	Bacteria;Proteobacteria;Gammaproteobacteria;Pseudomonadales;Pseudomonadaceae;Pseudomonas
SILVA_123_SSURef_tax_silva_full_align_trunc.fasta.gz	Bacteria;Proteobacteria;Gammaproteobacteria;Pseudomonadales;Pseudomonadaceae;Pseudomonas
SILVA_128_SSURef_tax_silva.fasta.gz	Bacteria;Proteobacteria;Gammaproteobacteria;Pseudomonadales;Pseudomonadaceae;Pseudomonas
SILVA_128_SSURef_tax_silva_full_align_trunc.fasta.gz	Bacteria;Proteobacteria;Gammaproteobacteria;Pseudomonadales;Pseudomonadaceae;Pseudomonas
SILVA_132_SSURef_tax_silva.fasta.gz	Bacteria;Proteobacteria;Gammaproteobacteria;Pseudomonadales;Pseudomonadaceae;Pseudomonas
SILVA_132_SSURef_tax_silva_full_align_trunc.fasta.gz	Bacteria;Proteobacteria;Gammaproteobacteria;Pseudomonadales;Pseudomonadaceae;Pseudomonas
bac_ssu_r86.1_20180911.fna.gz	Bacteria;Proteobacteria;Gammaproteobacteria;Pseudomonadales;Pseudomonadaceae
63	TACGGAAGGTCCGGGCGTTATCCGGATTTATTGGGTTTAAAGGGAGCGTAGGCCGGAGATTAAGCGTGTT_CCTGTTCGATACCCGCACTTTCGAGCTTCAGCGTCAGTTGCGCTCCAGTGAGCTGCCTTCGCAATCGGAG
SILVA_123_SSURef_tax_silva.fasta.gz	Bacteria;Bacteroidetes;Bacteroidia;Bacteroidales;Prevotellaceae;Prevotella_9
SILVA_123_SSURef_tax_silva_full_align_trunc.fasta.gz	Bacteria;Bacteroidetes;Bacteroidia;Bacteroidales;Prevotellaceae;Prevotella_9
SILVA_128_SSURef_tax_silva.fasta.gz	Bacteria;Bacteroidetes;Bacteroidia;Bacteroidales;Prevotellaceae;Prevotella_9
SILVA_128_SSURef_tax_silva_full_align_trunc.fasta.gz	Bacteria;Bacteroidetes;Bacteroidia;Bacteroidales;Prevotellaceae;Prevotella_9
SILVA_132_SSURef_tax_silva.fasta.gz	Bacteria;Bacteroidetes;Bacteroidia;Bacteroidales;Prevotellaceae;Prevotella_9
SILVA_132_SSURef_tax_silva_full_align_trunc.fasta.gz	Bacteria;Bacteroidetes;Bacteroidia;Bacteroidales;Prevotellaceae;Prevotella_9
bac_ssu_r86.1_20180911.fna.gz	Bacteria;Bacteroidota;Bacteroidia;Bacteroidales;Bacteroidaceae;Prevotella
64	TACGGAGGGTGCAAGCGTTACCCGGAATCACTGGGCGTAAAGGGCGTGTAGGCGGAAATTTAAGTCTGGT_CCGGTTTGCTCCCCACACTTTCGCGCCTCAGCGTCACCTTCTGTCCAGTAACTTGCCTTCGCTATTGGTG
SILVA_123_SSURef_tax_silva.fasta.gz	Bacteria;Deinococcus-Thermus;Deinococci;Deinococcales;Deinococcaceae;Deinococcus
SILVA_123_SSURef_tax_silva_full_align_trunc.fasta.gz	Bacteria;Deinococcus-Thermus;Deinococci;Deinococcales;Deinococcaceae;Deinococcus
SILVA_128_SSURef_tax_silva.fasta.gz	Bacteria;Deinococcus-Thermus;Deinococci;Deinococcales;Deinococcaceae;Deinococcus
SILVA_128_SSURef_tax_silva_full_align_trunc.fasta.gz	Bacteria;Deinococcus-Thermus;Deinococci;Deinococcales;Deinococcaceae;Deinococcus
SILVA_132_SSURef_tax_silva.fasta.gz	Bacteria;Deinococcus-Thermus;Deinococci;Deinococcales;Deinococcaceae;Deinococcus
SILVA_132_SSURef_tax_silva_full_align_trunc.fasta.gz	Bacteria;Deinococcus-Thermus;Deinococci;Deinococcales;Deinococcaceae;Deinococcus
bac_ssu_r86.1_20180911.fna.gz	Bacteria;Deinococcota;Deinococci;Deinococcales;Deinococcaceae;Deinococcus
65	TACGTAGGTGGCAAGCGTTGTCCGGATTTATTGGGCGTAAAGCGAGCGCAGGCGGTTTCTTAAGTCTGAT_CCTGTTTGCTCCCCACGCTTTCGAGCCTCAGCGTCAGTTACAGACCAGAGAGCCGCCTTCGCCACTGGTG
SILVA_123_SSURef_tax_silva.fasta.gz	Bacteria;Firmicutes;Bacilli;Lactobacillales;Enterococcaceae;Enterococcus
SILVA_123_SSURef_tax_silva_full_align_trunc.fasta.gz	Bacteria;Firmicutes;Bacilli;Lactobacillales;Enterococcaceae;Enterococcus
SILVA_128_SSURef_tax_silva.fasta.gz	Bacteria;Firmicutes;Bacilli;Lactobacillales;Enterococcaceae;Enterococcus
SILVA_128_SSURef_tax_silva_full_align_trunc.fasta.gz	Bacteria;Firmicutes;Bacilli;Lactobacillales;Enterococcaceae;Enterococcus
SILVA_132_SSURef_tax_silva.fasta.gz	Bacteria;Firmicutes;Bacilli;Lactobacillales;Enterococcaceae;Enterococcus
SILVA_132_SSURef_tax_silva_full_align_trunc.fasta.gz	Bacteria;Firmicutes;Bacilli;Lactobacillales;Enterococcaceae;Enterococcus
bac_ssu_r86.1_20180911.fna.gz	Bacteria;Firmicutes;Bacilli;Lactobacillales;Enterococcaceae
66	TACGTAGGTCCCGAGCGTTGTCCGGATTTATTGGGCGTAAAGCGAGCGCAGGCGGTTCTTTAAGTCTTAA_CCTGTTTGCTCCCCACGCTTTCGAGCCTCAGCGTCAGTTACAGACCAGAGAGCCGCTTTCGCCACCGGTG
SILVA_123_SSURef_tax_silva.fasta.gz	Bacteria;Firmicutes;Bacilli;Lactobacillales;Streptococcaceae;Streptococcus
SILVA_123_SSURef_tax_silva_full_align_trunc.fasta.gz	Bacteria;Firmicutes;Bacilli;Lactobacillales;Streptococcaceae;Streptococcus
SILVA_128_SSURef_tax_silva.fasta.gz	Bacteria;Firmicutes;Bacilli;Lactobacillales;Streptococcaceae;Streptococcus
SILVA_128_SSURef_tax_silva_full_align_trunc.fasta.gz	Bacteria;Firmicutes;Bacilli;Lactobacillales;Streptococcaceae;Streptococcus
SILVA_132_SSURef_tax_silva.fasta.gz	Bacteria;Firmicutes;Bacilli;Lactobacillales;Streptococcaceae;Streptococcus
SILVA_132_SSURef_tax_silva_full_align_trunc.fasta.gz	Bacteria;Firmicutes;Bacilli;Lactobacillales;Streptococcaceae;Streptococcus
bac_ssu_r86.1_20180911.fna.gz	Bacteria;Firmicutes;Bacilli;Lactobacillales;Streptococcaceae;Streptococcus
67	TACGTAGGTGGCAAGCGNTGTCCGGATTTACTGGGCGTAAAGGGAGCGTAGGTGGATATTTAAGTGGGAT_CCTGTTTGCTCCCCACGCTTTCGAGCCTCAGTGTCAGTTACAGTCCAGAAAGTCGCCTTCGCCACTGGTA
SILVA_123_SSURef_tax_silva.fasta.gz	Bacteria;Firmicutes;Clostridia;Clostridiales;Clostridiaceae_1;Clostridium_sensu_stricto_1
SILVA_123_SSURef_tax_silva_full_align_trunc.fasta.gz	Bacteria;Firmicutes;Clostridia;Clostridiales;Clostridiaceae_1;Clostridium_sensu_stricto_1
SILVA_128_SSURef_tax_silva.fasta.gz	Bacteria;Firmicutes;Clostridia;Clostridiales;Clostridiaceae_1;Clostridium_sensu_stricto_1
SILVA_128_SSURef_tax_silva_full_align_trunc.fasta.gz	Bacteria;Firmicutes;Clostridia;Clostridiales;Clostridiaceae_1;Clostridium_sensu_stricto_1
SILVA_132_SSURef_tax_silva.fasta.gz	Bacteria;Firmicutes;Clostridia;Clostridiales;Clostridiaceae_1;Clostridium_sensu_stricto_1
SILVA_132_SSURef_tax_silva_full_align_trunc.fasta.gz	Bacteria;Firmicutes;Clostridia;Clostridiales;Clostridiaceae_1;Clostridium_sensu_stricto_1
bac_ssu_r86.1_20180911.fna.gz	Bacteria;Firmicutes_A;Clostridia;Clostridiales;Clostridiaceae;Clostridium
68	TACGTAGGTCCCGAGCGTTGTCCGGATTTATTGGGCGTAAAGCGAGCGCAGGCGGTTCTTTTAGTCTGAA_CCTGTTTGCTCCCCACGCTTTCGAGCCTCAGCGTCAGTTACAGACCAGAGAGCCGCTTTCGCCACCGGTG
SILVA_123_SSURef_tax_silva.fasta.gz	Bacteria;Firmicutes;Bacilli;Lactobacillales;Streptococcaceae;Streptococcus
SILVA_123_SSURef_tax_silva_full_align_trunc.fasta.gz	Bacteria;Firmicutes;Bacilli;Lactobacillales;Streptococcaceae;Streptococcus
SILVA_128_SSURef_tax_silva.fasta.gz	Bacteria;Firmicutes;Bacilli;Lactobacillales;Streptococcaceae;Streptococcus
SILVA_128_SSURef_tax_silva_full_align_trunc.fasta.gz	Bacteria;Firmicutes;Bacilli;Lactobacillales;Streptococcaceae;Streptococcus
SILVA_132_SSURef_tax_silva.fasta.gz	Bacteria;Firmicutes;Bacilli;Lactobacillales;Streptococcaceae;Streptococcus
SILVA_132_SSURef_tax_silva_full_align_trunc.fasta.gz	Bacteria;Firmicutes;Bacilli;Lactobacillales;Streptococcaceae;Streptococcus
bac_ssu_r86.1_20180911.fna.gz	Bacteria;Firmicutes;Bacilli;Lactobacillales;Streptococcaceae;Streptococcus
69	TACGTAGGTGGCAAGCGTTATCCGGAATTATTGGGCGTAAAGCGCGCGTAGGCGGTTTTTTAAGTCTGAT_CCTGTTTGATCCCCACGCTTTCGCACATCCGCGTCAGTTACAGACCAGAAAGTCGCCTTCGCCACTGGTG
SILVA_123_SSURef_tax_silva.fasta.gz	Bacteria;Firmicutes;Bacilli;Bacillales;Staphylococcaceae;Staphylococcus
SILVA_123_SSURef_tax_silva_full_align_trunc.fasta.gz	Bacteria;Firmicutes;Bacilli;Bacillales;Staphylococcaceae;Staphylococcus
SILVA_128_SSURef_tax_silva.fasta.gz	Bacteria;Firmicutes;Bacilli;Bacillales;Staphylococcaceae;Staphylococcus
SILVA_128_SSURef_tax_silva_full_align_trunc.fasta.gz	Bacteria;Firmicutes;Bacilli;Bacillales;Staphylococcaceae;Staphylococcus
SILVA_132_SSURef_tax_silva.fasta.gz	Bacteria;Firmicutes;Bacilli;Bacillales;Staphylococcaceae;Staphylococcus
SILVA_132_SSURef_tax_silva_full_align_trunc.fasta.gz	Bacteria;Firmicutes;Bacilli;Bacillales;Staphylococcaceae;Staphylococcus
bac_ssu_r86.1_20180911.fna.gz	Bacteria;Firmicutes;Bacilli;Staphylococcales;Staphylococcaceae;Staphylococcus
70	TACGTAGGTGGCAAGCGTTGTCCGGATTTATTGGGCGTAAAGCGAGTGCAGGCGGTTCAATAAGTCTGAT_CCTGTTCGCTACCCATGCTTTCGAGCCTCAGCGTCAGTTGCAGACCAGAGAGCCGCCTTCGCTACTGGTG
SILVA_123_SSURef_tax_silva.fasta.gz	Bacteria;Firmicutes;Bacilli;Lactobacillales;Lactobacillaceae;Lactobacillus
SILVA_123_SSURef_tax_silva_full_align_trunc.fasta.gz	Bacteria;Firmicutes;Bacilli;Lactobacillales;Lactobacillaceae;Lactobacillus
SILVA_128_SSURef_tax_silva.fasta.gz	Bacteria;Firmicutes;Bacilli;Lactobacillales;Lactobacillaceae;Lactobacillus
SILVA_128_SSURef_tax_silva_full_align_trunc.fasta.gz	Bacteria;Firmicutes;Bacilli;Lactobacillales;Lactobacillaceae;Lactobacillus
SILVA_132_SSURef_tax_silva.fasta.gz	Bacteria;Firmicutes;Bacilli;Lactobacillales;Lactobacillaceae;Lactobacillus
SILVA_132_SSURef_tax_silva_full_align_trunc.fasta.gz	Bacteria;Firmicutes;Bacilli;Lactobacillales;Lactobacillaceae;Lactobacillus
bac_ssu_r86.1_20180911.fna.gz	Bacteria;Firmicutes;Bacilli;Lactobacillales;Lactobacillaceae;Lactobacillus
71	TACGGAGGATGCGAGCGTTATCCGGATTTATTGGGTTTAAAGGGTGCGTAGGTTGTTCGGTAAGTCAGCG_CCTGTTTGATACCCACGCCTTCGTGCTTCAGTGTCAGTCGCAGTATGGCAAGCTGCCTTCGCAATCGGAG
SILVA_123_SSURef_tax_silva.fasta.gz	Bacteria;Bacteroidetes;Bacteroidia;Bacteroidales;Porphyromonadaceae;Porphyromonas
SILVA_123_SSURef_tax_silva_full_align_trunc.fasta.gz	Bacteria;Bacteroidetes;Bacteroidia;Bacteroidales;Porphyromonadaceae;Porphyromonas
SILVA_128_SSURef_tax_silva.fasta.gz	Bacteria;Bacteroidetes;Bacteroidia;Bacteroidales;Porphyromonadaceae;Porphyromonas
SILVA_128_SSURef_tax_silva_full_align_trunc.fasta.gz	Bacteria;Bacteroidetes;Bacteroidia;Bacteroidales;Porphyromonadaceae;Porphyromonas
SILVA_132_SSURef_tax_silva.fasta.gz	Bacteria;Bacteroidetes;Bacteroidia;Bacteroidales;Porphyromonadaceae;Porphyromonas
SILVA_132_SSURef_tax_silva_full_align_trunc.fasta.gz	Bacteria;Bacteroidetes;Bacteroidia;Bacteroidales;Porphyromonadaceae;Porphyromonas
bac_ssu_r86.1_20180911.fna.gz	Bacteria;Bacteroidota;Bacteroidia;Bacteroidales;Porphyromonadaceae;Porphyromonas
72	TACGTAGGTCCCGAGCGTTGTCCGGATTTATTGGGCGTAAAGCGAGCGCAGGCGGTTCTTTAAGTCTGAA_CCTGTTTGCTCCCCACGCTTTCGAGCCTCAGCGTCAGTTACAGACCAGAGAGCCGCTTTCGCCACCGGTG
SILVA_123_SSURef_tax_silva.fasta.gz	Bacteria;Firmicutes;Bacilli;Lactobacillales;Streptococcaceae;Streptococcus
SILVA_123_SSURef_tax_silva_full_align_trunc.fasta.gz	Bacteria;Firmicutes;Bacilli;Lactobacillales;Streptococcaceae;Streptococcus
SILVA_128_SSURef_tax_silva.fasta.gz	Bacteria;Firmicutes;Bacilli;Lactobacillales;Streptococcaceae;Streptococcus
SILVA_128_SSURef_tax_silva_full_align_trunc.fasta.gz	Bacteria;Firmicutes;Bacilli;Lactobacillales;Streptococcaceae;Streptococcus
SILVA_132_SSURef_tax_silva.fasta.gz	Bacteria;Firmicutes;Bacilli;Lactobacillales;Streptococcaceae;Streptococcus
SILVA_132_SSURef_tax_silva_full_align_trunc.fasta.gz	Bacteria;Firmicutes;Bacilli;Lactobacillales;Streptococcaceae;Streptococcus
bac_ssu_r86.1_20180911.fna.gz	Bacteria;Firmicutes;Bacilli;Lactobacillales;Streptococcaceae;Streptococcus

## Sheet: mock16
1	TACGGAGGGTGCGAGCGTTAATCGGAATCACTGGGCGTAAAGCGCACGTAGGCTGCTTGGTAAGTCAGGG_CCTGTTTGCTCCCCACGCTTTCGCACCTCAGCGTCAGTACCGGTCCAGGTAGTCGCCTTCGCCACTGATG
SILVA_123_SSURef_tax_silva.fasta.gz	Bacteria;Proteobacteria;Deltaproteobacteria;Desulfovibrionales;Desulfovibrionaceae;Desulfovibrio
SILVA_123_SSURef_tax_silva_full_align_trunc.fasta.gz	Bacteria;Proteobacteria;Deltaproteobacteria;Desulfovibrionales;Desulfovibrionaceae;Desulfovibrio
SILVA_128_SSURef_tax_silva.fasta.gz	Bacteria;Proteobacteria;Deltaproteobacteria;Desulfovibrionales;Desulfovibrionaceae;Desulfovibrio
SILVA_128_SSURef_tax_silva_full_align_trunc.fasta.gz	Bacteria;Proteobacteria;Deltaproteobacteria;Desulfovibrionales;Desulfovibrionaceae;Desulfovibrio
SILVA_132_SSURef_tax_silva.fasta.gz	Bacteria;Proteobacteria;Deltaproteobacteria;Desulfovibrionales;Desulfovibrionaceae;Desulfovibrio
SILVA_132_SSURef_tax_silva_full_align_trunc.fasta.gz	Bacteria;Proteobacteria;Deltaproteobacteria;Desulfovibrionales;Desulfovibrionaceae;Desulfovibrio
bac_ssu_r86.1_20180911.fna.gz	Bacteria;Desulfobacterota;Desulfovibrionia;Desulfovibrionales;Desulfovibrionaceae;Desulfovibrio_A
2	TACGGAGGATGCAAGCGTTATCCGGAATGATTGGGCGTAAAGCGTCCGCAGGTGGCACTGTAAGTCTGCT_CCCATTCGCTCCCCTAGCTTTCGTCCCTCAGTGTCAGTTACGGCCTAGCAGAGCGCTTTCGCCACCGGTG
SILVA_123_SSURef_tax_silva.fasta.gz	Bacteria;Cyanobacteria;Cyanobacteria;SubsectionIV;FamilyI;Anabaena
SILVA_123_SSURef_tax_silva_full_align_trunc.fasta.gz	Bacteria;Cyanobacteria;Cyanobacteria;SubsectionIV;FamilyI;Anabaena
SILVA_128_SSURef_tax_silva.fasta.gz	Bacteria;Cyanobacteria;Cyanobacteria;SubsectionIV;FamilyI;Anabaena
SILVA_128_SSURef_tax_silva_full_align_trunc.fasta.gz	Bacteria;Cyanobacteria;Cyanobacteria;SubsectionIV;FamilyI;Anabaena
SILVA_132_SSURef_tax_silva.fasta.gz	Bacteria;Cyanobacteria;Oxyphotobacteria;Nostocales;Nostocaceae;Nostoc_PCC-7524
SILVA_132_SSURef_tax_silva_full_align_trunc.fasta.gz	Bacteria;Cyanobacteria;Oxyphotobacteria;Nostocales;Nostocaceae;Nostoc_PCC-7524
bac_ssu_r86.1_20180911.fna.gz	Bacteria;Cyanobacteriota;Cyanobacteriia;Cyanobacteriales;Nostocaceae;Trichormus
3	GACGTAGGGGGCGAGCGTTGTCCGGATTTACTGGGCGTAAAGGGCGTGTAGGCGGCTTAGCAAGTCAGAT_CCCGTTCGCTCCCCTAGCTTTCGCGCCTCAGCGTCAGGGACAGTCCAGAGAGCCGCCTTCGCCACCGGCG
SILVA_123_SSURef_tax_silva.fasta.gz	Bacteria;Dictyoglomi;Dictyoglomia;Dictyoglomales;Dictyoglomaceae;Dictyoglomus
SILVA_123_SSURef_tax_silva_full_align_trunc.fasta.gz	Bacteria;Dictyoglomi;Dictyoglomia;Dictyoglomales;Dictyoglomaceae;Dictyoglomus
SILVA_128_SSURef_tax_silva.fasta.gz	Bacteria;Dictyoglomi;Dictyoglomia;Dictyoglomales;Dictyoglomaceae;Dictyoglomus
SILVA_128_SSURef_tax_silva_full_align_trunc.fasta.gz	Bacteria;Dictyoglomi;Dictyoglomia;Dictyoglomales;Dictyoglomaceae;Dictyoglomus
SILVA_132_SSURef_tax_silva.fasta.gz	Bacteria;Dictyoglomi;Dictyoglomia;Dictyoglomales;Dictyoglomaceae;Dictyoglomus
SILVA_132_SSURef_tax_silva_full_align_trunc.fasta.gz	Bacteria;Dictyoglomi;Dictyoglomia;Dictyoglomales;Dictyoglomaceae;Dictyoglomus
bac_ssu_r86.1_20180911.fna.gz	Bacteria;Dictyoglomota;Dictyoglomia;Dictyoglomales;Dictyoglomaceae;Dictyoglomus
4	TACGGAGGGTGCAAGCGTTACCCGGAATCACTGGGCGTAAAGGGCGTGTAGGCGGAAATTTAAGTCTGGT_CCGGTTTGCTCCCCACACTTTCGCGCCTCAGCGTCACCTTCTGTCCAGTAACTTGCCTTCGCCATTGGTG
SILVA_123_SSURef_tax_silva.fasta.gz	Bacteria;Deinococcus-Thermus;Deinococci;Deinococcales;Deinococcaceae;Deinococcus
SILVA_123_SSURef_tax_silva_full_align_trunc.fasta.gz	Bacteria;Deinococcus-Thermus;Deinococci;Deinococcales;Deinococcaceae;Deinococcus
SILVA_128_SSURef_tax_silva.fasta.gz	Bacteria;Deinococcus-Thermus;Deinococci;Deinococcales;Deinococcaceae;Deinococcus
SILVA_128_SSURef_tax_silva_full_align_trunc.fasta.gz	Bacteria;Deinococcus-Thermus;Deinococci;Deinococcales;Deinococcaceae;Deinococcus
SILVA_132_SSURef_tax_silva.fasta.gz	Bacteria;Deinococcus-Thermus;Deinococci;Deinococcales;Deinococcaceae;Deinococcus
SILVA_132_SSURef_tax_silva_full_align_trunc.fasta.gz	Bacteria;Deinococcus-Thermus;Deinococci;Deinococcales;Deinococcaceae;Deinococcus
bac_ssu_r86.1_20180911.fna.gz	Bacteria;Deinococcota;Deinococci;Deinococcales;Deinococcaceae;Deinococcus
5	TACGGAGGATCCGAGCGTTATCCGGATTTATTGGGTTTAAAGGGAGCGTAGGTGGACAGTTAAGTCAGTT_CCTGTTTGATACCCACACTTTCGAGCATCAGTGTCAATTGCAGTCCAGTGAGCTGCCTTCGCAATCGGAG
SILVA_123_SSURef_tax_silva.fasta.gz	Bacteria;Bacteroidetes;Bacteroidia;Bacteroidales;Bacteroidaceae;Bacteroides
SILVA_123_SSURef_tax_silva_full_align_trunc.fasta.gz	Bacteria;Bacteroidetes;Bacteroidia;Bacteroidales;Bacteroidaceae;Bacteroides
SILVA_128_SSURef_tax_silva.fasta.gz	Bacteria;Bacteroidetes;Bacteroidia;Bacteroidales;Bacteroidaceae;Bacteroides
SILVA_128_SSURef_tax_silva_full_align_trunc.fasta.gz	Bacteria;Bacteroidetes;Bacteroidia;Bacteroidales;Bacteroidaceae;Bacteroides
SILVA_132_SSURef_tax_silva.fasta.gz	Bacteria;Bacteroidetes;Bacteroidia;Bacteroidales;Bacteroidaceae;Bacteroides
SILVA_132_SSURef_tax_silva_full_align_trunc.fasta.gz	Bacteria;Bacteroidetes;Bacteroidia;Bacteroidales;Bacteroidaceae;Bacteroides
bac_ssu_r86.1_20180911.fna.gz	Bacteria;Bacteroidota;Bacteroidia;Bacteroidales;Bacteroidaceae;Bacteroides
6	TACCGGCGGCCCGAGTGGTGGCCACTATTATTGGGCCTAAAGCGGCCGTAGCCGGGCCCGTAAGTCCCTG_CCGGTTCGCTCCCCTGGCCTTCGGCCCTCACCGTCGGACCCGTTCCAGCCGGGCGCCTTCGCCACTGGCG
SILVA_123_SSURef_tax_silva.fasta.gz	Archaea;Euryarchaeota;Thermococci;Thermococcales;Thermococcaceae;Pyrococcus
SILVA_123_SSURef_tax_silva_full_align_trunc.fasta.gz	Archaea;Euryarchaeota;Thermococci;Thermococcales;Thermococcaceae;Pyrococcus
SILVA_128_SSURef_tax_silva.fasta.gz	Archaea;Euryarchaeota;Thermococci;Thermococcales;Thermococcaceae;Pyrococcus
SILVA_128_SSURef_tax_silva_full_align_trunc.fasta.gz	Archaea;Euryarchaeota;Thermococci;Thermococcales;Thermococcaceae;Pyrococcus
SILVA_132_SSURef_tax_silva.fasta.gz	Archaea;Euryarchaeota;Thermococci;Thermococcales;Thermococcaceae;Pyrococcus
SILVA_132_SSURef_tax_silva_full_align_trunc.fasta.gz	Archaea;Euryarchaeota;Thermococci;Thermococcales;Thermococcaceae;Pyrococcus
SILVA_132_SSURef_tax_silva_full_align_trunc.fasta.gz
7	TACGGAGGGGGTTAGCGTTGTTCGGAATTACTGGGCGTAAAGCGCGCGTAGGCGGACCAGAAAGTTGGGG_CCTGTTTGCTCCCCACACTTTCGCACCTCAGCGTCAATATCGAGCCAGTGAGCCGCCTTCGCCACTGGTG
SILVA_123_SSURef_tax_silva.fasta.gz	Bacteria;Proteobacteria;Alphaproteobacteria;Rhodobacterales;Rhodobacteraceae
SILVA_123_SSURef_tax_silva_full_align_trunc.fasta.gz	Bacteria;Proteobacteria;Alphaproteobacteria;Rhodobacterales;Rhodobacteraceae
SILVA_128_SSURef_tax_silva.fasta.gz	Bacteria;Proteobacteria;Alphaproteobacteria;Rhodobacterales;Rhodobacteraceae
SILVA_128_SSURef_tax_silva_full_align_trunc.fasta.gz	Bacteria;Proteobacteria;Alphaproteobacteria;Rhodobacterales;Rhodobacteraceae
SILVA_132_SSURef_tax_silva.fasta.gz	Bacteria;Proteobacteria;Alphaproteobacteria;Rhodobacterales;Rhodobacteraceae
SILVA_132_SSURef_tax_silva_full_align_trunc.fasta.gz	Bacteria;Proteobacteria;Alphaproteobacteria;Rhodobacterales;Rhodobacteraceae
bac_ssu_r86.1_20180911.fna.gz	Bacteria;Proteobacteria;Alphaproteobacteria;Rhodobacterales;Rhodobacteraceae
8	GACAGAGGGGGCAAGCGTTGTCCGGAGTTACTGGGCGTAAAGGGCGCGCAGGCGGTGGGCTGCGTCGGCG_CCGGTTTGCTCCCCACGCTGTCGCGCCGCAGCGTCAGGTCAAGCCCAGGTGGCCGGCTTCCCCACTGGCG
SILVA_123_SSURef_tax_silva.fasta.gz	Bacteria;Chloroflexi;Chloroflexia;Chloroflexales;Chloroflexaceae;Chloroflexus
SILVA_123_SSURef_tax_silva_full_align_trunc.fasta.gz	Bacteria;Chloroflexi;Chloroflexia;Chloroflexales;Chloroflexaceae;Chloroflexus
SILVA_128_SSURef_tax_silva.fasta.gz	Bacteria;Chloroflexi;Chloroflexia;Chloroflexales;Chloroflexaceae;Chloroflexus
SILVA_128_SSURef_tax_silva_full_align_trunc.fasta.gz	Bacteria;Chloroflexi;Chloroflexia;Chloroflexales;Chloroflexaceae;Chloroflexus
SILVA_132_SSURef_tax_silva.fasta.gz	Bacteria;Chloroflexi;Chloroflexia;Chloroflexales;Chloroflexaceae;Chloroflexus
SILVA_132_SSURef_tax_silva_full_align_trunc.fasta.gz	Bacteria;Chloroflexi;Chloroflexia;Chloroflexales;Chloroflexaceae;Chloroflexus
bac_ssu_r86.1_20180911.fna.gz	Bacteria;Chloroflexota;Chloroflexia;Chloroflexales;Chloroflexaceae;Chloroflexus
9	TACGGAGGGGGTTAGCGTTGTTCGGAATTACTGGGCGTAAAGCGTACGTAGGCGGATTGGAAAGTTGGGG_CCTGTTTGCTCCCCACACTTTCGTACCTCAGCGTCAGTATCGAGCCAGTGAGCCGCCTTCGCCACTGGTG
SILVA_123_SSURef_tax_silva.fasta.gz	Bacteria;Proteobacteria;Alphaproteobacteria;Rhodobacterales;Rhodobacteraceae;Sulfitobacter
SILVA_123_SSURef_tax_silva_full_align_trunc.fasta.gz	Bacteria;Proteobacteria;Alphaproteobacteria;Rhodobacterales;Rhodobacteraceae;Sulfitobacter
SILVA_128_SSURef_tax_silva.fasta.gz	Bacteria;Proteobacteria;Alphaproteobacteria;Rhodobacterales;Rhodobacteraceae;Sulfitobacter
SILVA_128_SSURef_tax_silva_full_align_trunc.fasta.gz	Bacteria;Proteobacteria;Alphaproteobacteria;Rhodobacterales;Rhodobacteraceae;Sulfitobacter
SILVA_132_SSURef_tax_silva.fasta.gz	Bacteria;Proteobacteria;Alphaproteobacteria;Rhodobacterales;Rhodobacteraceae;Sulfitobacter
SILVA_132_SSURef_tax_silva_full_align_trunc.fasta.gz	Bacteria;Proteobacteria;Alphaproteobacteria;Rhodobacterales;Rhodobacteraceae;Sulfitobacter
bac_ssu_r86.1_20180911.fna.gz	Bacteria;Proteobacteria;Alphaproteobacteria;Rhodobacterales;Rhodobacteraceae;Sulfitobacter
10	TACCAGCTCCGCGAGTGGTCGGGGTGTTTACTGGGCTTAAAGCGCCCGTAGCCGGCCCGGCAAGTCGCTC_CCCCTTTGCTCCCCCGGCTTTCGCCCCTCACCGTCGGGCGCGTTCTGGCCGCCCGCTTTCGCCACTGGTG
SILVA_123_SSURef_tax_silva.fasta.gz	Archaea;Crenarchaeota;Thermoprotei;Thermoproteales;Thermoproteaceae;Pyrobaculum
SILVA_123_SSURef_tax_silva_full_align_trunc.fasta.gz	Archaea;Crenarchaeota;Thermoprotei;Thermoproteales;Thermoproteaceae;Pyrobaculum
SILVA_128_SSURef_tax_silva.fasta.gz	Archaea;Crenarchaeota;Thermoprotei;Thermoproteales;Thermoproteaceae;Pyrobaculum
SILVA_128_SSURef_tax_silva_full_align_trunc.fasta.gz	Archaea;Crenarchaeota;Thermoprotei;Thermoproteales;Thermoproteaceae;Pyrobaculum
SILVA_132_SSURef_tax_silva.fasta.gz	Archaea;Crenarchaeota;Thermoprotei;Thermoproteales;Thermoproteaceae;Pyrobaculum
SILVA_132_SSURef_tax_silva_full_align_trunc.fasta.gz	Archaea;Crenarchaeota;Thermoprotei;Thermoproteales;Thermoproteaceae;Pyrobaculum
SILVA_132_SSURef_tax_silva_full_align_trunc.fasta.gz
11	CACCGACGGCCCGAGTGGTGGCCACTCTTATTGGGCCTAAAGCGTCCGTAGCCGGTCCAGTAAGTCCCTG_CCGGTTCGCGCCCCTGGCTTTCGTCCCTCACCGTCGAACCCGTTCCAGACAAGTGCCTTCGCCATAGGTG
SILVA_123_SSURef_tax_silva.fasta.gz	Archaea;Euryarchaeota;Methanococci;Methanococcales;Methanococcaceae;Methanococcus
SILVA_123_SSURef_tax_silva_full_align_trunc.fasta.gz	Archaea;Euryarchaeota;Methanococci;Methanococcales;Methanococcaceae;Methanococcus
SILVA_128_SSURef_tax_silva.fasta.gz	Archaea;Euryarchaeota;Methanococci;Methanococcales;Methanococcaceae;Methanococcus
SILVA_128_SSURef_tax_silva_full_align_trunc.fasta.gz	Archaea;Euryarchaeota;Methanococci;Methanococcales;Methanococcaceae;Methanococcus
SILVA_132_SSURef_tax_silva.fasta.gz	Archaea;Euryarchaeota;Methanococci;Methanococcales;Methanococcaceae;Methanococcus
SILVA_132_SSURef_tax_silva_full_align_trunc.fasta.gz	Archaea;Euryarchaeota;Methanococci;Methanococcales;Methanococcaceae;Methanococcus
SILVA_132_SSURef_tax_silva_full_align_trunc.fasta.gz
12	CACGTACCGTCCAAACGTTATTCGGTATCACTGGGCTTAAAGCGTTCGTAGGCGGCCTAGAAGGTGAGAT_CCCGTTCGCTACCCTAGCTTTCGTTCCTCAGCGTCAGAAAAGACCCAGTGATGCGCTTTCGCCACCGGTG
SILVA_123_SSURef_tax_silva.fasta.gz	Bacteria;Planctomycetes;Planctomycetacia;Planctomycetales;Planctomycetaceae;Rhodopirellula
SILVA_123_SSURef_tax_silva_full_align_trunc.fasta.gz	Bacteria;Planctomycetes;Planctomycetacia;Planctomycetales;Planctomycetaceae;Rhodopirellula
SILVA_128_SSURef_tax_silva.fasta.gz	Bacteria;Planctomycetes;Planctomycetacia;Planctomycetales;Planctomycetaceae;Rhodopirellula
SILVA_128_SSURef_tax_silva_full_align_trunc.fasta.gz	Bacteria;Planctomycetes;Planctomycetacia;Planctomycetales;Planctomycetaceae;Rhodopirellula
SILVA_132_SSURef_tax_silva.fasta.gz	Bacteria;Planctomycetes;Planctomycetacia;Pirellulales;Pirellulaceae;Rhodopirellula
SILVA_132_SSURef_tax_silva_full_align_trunc.fasta.gz	Bacteria;Planctomycetes;Planctomycetacia;Pirellulales;Pirellulaceae;Rhodopirellula
bac_ssu_r86.1_20180911.fna.gz	Bacteria;Planctomycetota;Planctomycetes;Pirellulales;Pirellulaceae;Rhodopirellula
13	CACGTAAGGGGCGAGCGTTGTTCGGAATTATTGGGCGTAAAGGGCATGTAGGCGGTTATGTAAGCCTGGT_CCTGTTCGATCCCCACACTTTCGCATCTCAGCGTCAATTATCGGCCAGAAACCCGCCTTCGCCACCGGTG
SILVA_123_SSURef_tax_silva.fasta.gz	Bacteria;Spirochaetae;Spirochaetes;Spirochaetales;Spirochaetaceae;Treponema_2
SILVA_123_SSURef_tax_silva_full_align_trunc.fasta.gz	Bacteria;Spirochaetae;Spirochaetes;Spirochaetales;Spirochaetaceae;Treponema_2
SILVA_128_SSURef_tax_silva.fasta.gz	Bacteria;Spirochaetae;Spirochaetes;Spirochaetales;Spirochaetaceae;Treponema_2
SILVA_128_SSURef_tax_silva_full_align_trunc.fasta.gz	Bacteria;Spirochaetae;Spirochaetes;Spirochaetales;Spirochaetaceae;Treponema_2
SILVA_132_SSURef_tax_silva.fasta.gz	Bacteria;Spirochaetes;Spirochaetia;Spirochaetales;Spirochaetaceae;Treponema_2
SILVA_132_SSURef_tax_silva_full_align_trunc.fasta.gz	Bacteria;Spirochaetes;Spirochaetia;Spirochaetales;Spirochaetaceae;Treponema_2
bac_ssu_r86.1_20180911.fna.gz	Bacteria;Spirochaetota;Spirochaetia;Treponematales;Treponemataceae;Treponema_A
14	TACGTATGTCACAAGCGTTATCCGGATTTATTGGGCGTAAAGCGCGTCTAGGTGGTTATGTAAGTCTGAT_CCTGTTTGCTACCCACGCTTTCGCGCTTCAGCGTCAGTATCTGTCTAGTAAGCTGGCTTCCCCATCGGCA
SILVA_123_SSURef_tax_silva.fasta.gz	Bacteria;Fusobacteria;Fusobacteriia;Fusobacteriales;Fusobacteriaceae;Fusobacterium
SILVA_123_SSURef_tax_silva_full_align_trunc.fasta.gz	Bacteria;Fusobacteria;Fusobacteriia;Fusobacteriales;Fusobacteriaceae;Fusobacterium
SILVA_128_SSURef_tax_silva.fasta.gz	Bacteria;Fusobacteria;Fusobacteriia;Fusobacteriales;Fusobacteriaceae;Fusobacterium
SILVA_128_SSURef_tax_silva_full_align_trunc.fasta.gz	Bacteria;Fusobacteria;Fusobacteriia;Fusobacteriales;Fusobacteriaceae;Fusobacterium
SILVA_132_SSURef_tax_silva.fasta.gz	Bacteria;Fusobacteria;Fusobacteriia;Fusobacteriales;Fusobacteriaceae;Fusobacterium
SILVA_132_SSURef_tax_silva_full_align_trunc.fasta.gz	Bacteria;Fusobacteria;Fusobacteriia;Fusobacteriales;Fusobacteriaceae;Fusobacterium
bac_ssu_r86.1_20180911.fna.gz	Bacteria;Fusobacteriota;Fusobacteriia;Fusobacteriales;Fusobacteriaceae;Fusobacterium
15	TACGTATGTCACAAGCGTTATCCGGATTTATTGGGCGTAAAGCGCGTCTAGGTGGTTATGTAAGTCTGAT_CCTGTTTGCTACCCACGCTTTCGCGCTTCAGCGTCAGTATCTGTCCAGTAAGCTGGCTTCCCCATCGGCA
SILVA_123_SSURef_tax_silva.fasta.gz	Bacteria;Fusobacteria;Fusobacteriia;Fusobacteriales;Fusobacteriaceae;Fusobacterium
SILVA_123_SSURef_tax_silva_full_align_trunc.fasta.gz	Bacteria;Fusobacteria;Fusobacteriia;Fusobacteriales;Fusobacteriaceae;Fusobacterium
SILVA_128_SSURef_tax_silva.fasta.gz	Bacteria;Fusobacteria;Fusobacteriia;Fusobacteriales;Fusobacteriaceae;Fusobacterium
SILVA_128_SSURef_tax_silva_full_align_trunc.fasta.gz	Bacteria;Fusobacteria;Fusobacteriia;Fusobacteriales;Fusobacteriaceae;Fusobacterium
SILVA_132_SSURef_tax_silva.fasta.gz	Bacteria;Fusobacteria;Fusobacteriia;Fusobacteriales;Fusobacteriaceae;Fusobacterium
SILVA_132_SSURef_tax_silva_full_align_trunc.fasta.gz	Bacteria;Fusobacteria;Fusobacteriia;Fusobacteriales;Fusobacteriaceae;Fusobacterium
bac_ssu_r86.1_20180911.fna.gz	Bacteria;Fusobacteriota;Fusobacteriia;Fusobacteriales;Fusobacteriaceae;Fusobacterium
16	TACGTAGGTGGCGAGCGTTGTCCGGAATTACTGGGCGTAAAGGGTGCGTAGGCGGCCTGGTAAGTTGAGC_CCTGTTTGCTCCCCACGCTTTCGTGCCTCAGCGTCAGTTACGGTCCAGACGGCCGCCTTCGCCACTGGTG
SILVA_123_SSURef_tax_silva.fasta.gz	Bacteria;Firmicutes;Clostridia;Thermoanaerobacterales;Family_III;Caldicellulosiruptor
SILVA_123_SSURef_tax_silva_full_align_trunc.fasta.gz	Bacteria;Firmicutes;Clostridia;Thermoanaerobacterales;Family_III;Caldicellulosiruptor
SILVA_128_SSURef_tax_silva.fasta.gz	Bacteria;Firmicutes;Clostridia;Thermoanaerobacterales;Family_III;Caldicellulosiruptor
SILVA_128_SSURef_tax_silva_full_align_trunc.fasta.gz	Bacteria;Firmicutes;Clostridia;Thermoanaerobacterales;Family_III;Caldicellulosiruptor
SILVA_132_SSURef_tax_silva.fasta.gz	Bacteria;Firmicutes;Clostridia;Thermoanaerobacterales;Family_III;Caldicellulosiruptor
SILVA_132_SSURef_tax_silva_full_align_trunc.fasta.gz	Bacteria;Firmicutes;Clostridia;Thermoanaerobacterales;Family_III;Caldicellulosiruptor
bac_ssu_r86.1_20180911.fna.gz	Bacteria;Firmicutes_A;Thermoanaerobacteria;Caldicellulosiruptorales;Caldicellulosiruptoraceae;Caldicellulosiruptor
17	TACGGAGGGTGCAAGCGTTAATCGGAATCACTGGGCGTAAAGCGCACGTAGGCTGTTATGTAAGTCAGGG_CCTGTTTGCTCCCCACGCTTTCGCACCTCAGCGTCAGTACCGGTCCAGGTGGCCGCCTTCGCCACTGATG
SILVA_123_SSURef_tax_silva.fasta.gz	Bacteria;Proteobacteria;Deltaproteobacteria;Desulfovibrionales;Desulfovibrionaceae;Desulfovibrio
SILVA_123_SSURef_tax_silva_full_align_trunc.fasta.gz	Bacteria;Proteobacteria;Deltaproteobacteria;Desulfovibrionales;Desulfovibrionaceae;Desulfovibrio
SILVA_128_SSURef_tax_silva.fasta.gz	Bacteria;Proteobacteria;Deltaproteobacteria;Desulfovibrionales;Desulfovibrionaceae;Desulfovibrio
SILVA_128_SSURef_tax_silva_full_align_trunc.fasta.gz	Bacteria;Proteobacteria;Deltaproteobacteria;Desulfovibrionales;Desulfovibrionaceae;Desulfovibrio
SILVA_132_SSURef_tax_silva.fasta.gz	Bacteria;Proteobacteria;Deltaproteobacteria;Desulfovibrionales;Desulfovibrionaceae;Desulfovibrio
SILVA_132_SSURef_tax_silva_full_align_trunc.fasta.gz	Bacteria;Proteobacteria;Deltaproteobacteria;Desulfovibrionales;Desulfovibrionaceae;Desulfovibrio
bac_ssu_r86.1_20180911.fna.gz	Bacteria;Desulfobacterota;Desulfovibrionia;Desulfovibrionales;Desulfovibrionaceae;Desulfovibrio
18	CACCGACGGCCCGAGTGGTGGCCACTCTTATTGGGCCTAAAGCGTCCGTAGCCGGTCCAGTAAGTCCCTG_CCGGTTCGCGCCCCTGGCTTTCGTCCCTCACCGTCGGACCCGTTCCAGACAAGTGCCTTCGCCATAGGTG
SILVA_123_SSURef_tax_silva.fasta.gz	Archaea;Euryarchaeota;Methanococci;Methanococcales;Methanococcaceae;Methanococcus
SILVA_123_SSURef_tax_silva_full_align_trunc.fasta.gz	Archaea;Euryarchaeota;Methanococci;Methanococcales;Methanococcaceae;Methanococcus
SILVA_128_SSURef_tax_silva.fasta.gz	Archaea;Euryarchaeota;Methanococci;Methanococcales;Methanococcaceae;Methanococcus
SILVA_128_SSURef_tax_silva_full_align_trunc.fasta.gz	Archaea;Euryarchaeota;Methanococci;Methanococcales;Methanococcaceae;Methanococcus
SILVA_132_SSURef_tax_silva.fasta.gz	Archaea;Euryarchaeota;Methanococci;Methanococcales;Methanococcaceae;Methanococcus
SILVA_132_SSURef_tax_silva_full_align_trunc.fasta.gz	Archaea;Euryarchaeota;Methanococci;Methanococcales;Methanococcaceae;Methanococcus
SILVA_132_SSURef_tax_silva_full_align_trunc.fasta.gz
19	TACGGAGGATCCGAGCGTTATCCGGATTTATTGGGTTTAAAGGGAGCGTAGGTGGACAGTTAAGTCAGTT_CCTGTTTGATACCCACACTTTCGAGCATCAGTGTCAGTTGCAGTCCAGTGAGCTGCCTTCGCAATCGGAG
SILVA_123_SSURef_tax_silva.fasta.gz	Bacteria;Bacteroidetes;Bacteroidia;Bacteroidales;Bacteroidaceae;Bacteroides
SILVA_123_SSURef_tax_silva_full_align_trunc.fasta.gz	Bacteria;Bacteroidetes;Bacteroidia;Bacteroidales;Bacteroidaceae;Bacteroides
SILVA_128_SSURef_tax_silva.fasta.gz	Bacteria;Bacteroidetes;Bacteroidia;Bacteroidales;Bacteroidaceae;Bacteroides
SILVA_128_SSURef_tax_silva_full_align_trunc.fasta.gz	Bacteria;Bacteroidetes;Bacteroidia;Bacteroidales;Bacteroidaceae;Bacteroides
SILVA_132_SSURef_tax_silva.fasta.gz	Bacteria;Bacteroidetes;Bacteroidia;Bacteroidales;Bacteroidaceae;Bacteroides
SILVA_132_SSURef_tax_silva_full_align_trunc.fasta.gz	Bacteria;Bacteroidetes;Bacteroidia;Bacteroidales;Bacteroidaceae;Bacteroides
bac_ssu_r86.1_20180911.fna.gz	Bacteria;Bacteroidota;Bacteroidia;Bacteroidales;Bacteroidaceae;Bacteroides
20	TACGGAGGGTGCAAGCGTTAATCGGAATGACTGGGCGTAAAGCGCACGCAGGCGGTCTGTTAAGTTGGAT_CCTGTTTGCTCCCCACGCTTTCGCACCTGAGCGTCAGTCTTCATCCAGGGGGCCGCCTTCGCCACCGGTA
SILVA_123_SSURef_tax_silva.fasta.gz	Bacteria;Proteobacteria;Gammaproteobacteria;Enterobacteriales;Enterobacteriaceae
SILVA_123_SSURef_tax_silva_full_align_trunc.fasta.gz	Bacteria;Proteobacteria;Gammaproteobacteria;Enterobacteriales;Enterobacteriaceae
SILVA_128_SSURef_tax_silva.fasta.gz	Bacteria;Proteobacteria;Gammaproteobacteria;Enterobacteriales;Enterobacteriaceae
SILVA_128_SSURef_tax_silva_full_align_trunc.fasta.gz	Bacteria;Proteobacteria;Gammaproteobacteria;Enterobacteriales;Enterobacteriaceae
SILVA_132_SSURef_tax_silva.fasta.gz	Bacteria;Proteobacteria;Gammaproteobacteria;Enterobacteriales;Enterobacteriaceae
SILVA_132_SSURef_tax_silva_full_align_trunc.fasta.gz	Bacteria;Proteobacteria;Gammaproteobacteria;Enterobacteriales;Enterobacteriaceae
bac_ssu_r86.1_20180911.fna.gz	Bacteria;Proteobacteria;Gammaproteobacteria;Enterobacterales;Enterobacteriaceae
21	TACAGAGGTCTCAAGCGTTGTTCGGAATCACTGGGCGTAAAGCGTGCGTAGGCTGTTTCGTAAGTCGTGT_CCCTTTCGCTCCCCTGGCCTTCGTGCCTCAGCGTCAGTTAATGTCCAGGAACCCGCCTTCGCCACGAGTG
SILVA_123_SSURef_tax_silva.fasta.gz	Bacteria;Verrucomicrobia;Verrucomicrobiae;Verrucomicrobiales;Verrucomicrobiaceae;Akkermansia
SILVA_123_SSURef_tax_silva_full_align_trunc.fasta.gz	Bacteria;Verrucomicrobia;Verrucomicrobiae;Verrucomicrobiales;Verrucomicrobiaceae;Akkermansia
SILVA_128_SSURef_tax_silva.fasta.gz	Bacteria;Verrucomicrobia;Verrucomicrobiae;Verrucomicrobiales;Verrucomicrobiaceae;Akkermansia
SILVA_128_SSURef_tax_silva_full_align_trunc.fasta.gz	Bacteria;Verrucomicrobia;Verrucomicrobiae;Verrucomicrobiales;Verrucomicrobiaceae;Akkermansia
SILVA_132_SSURef_tax_silva.fasta.gz	Bacteria;Verrucomicrobia;Verrucomicrobiae;Verrucomicrobiales;Akkermansiaceae;Akkermansia
SILVA_132_SSURef_tax_silva_full_align_trunc.fasta.gz	Bacteria;Verrucomicrobia;Verrucomicrobiae;Verrucomicrobiales;Akkermansiaceae;Akkermansia
bac_ssu_r86.1_20180911.fna.gz	Bacteria;Verrucomicrobiota
22	TACGGAGGATCCGAGCGTTATCCGGATTTATTGGGTTTAAAGGGAGCGTAGATGGATGTTTAAGTCAGTT_CCTGTTTGATACCCACACTTTCGAGCCTCAATGTCAGTTGCAGCTTAGCAGGCTGCCTTCGCAATCGGAG
SILVA_123_SSURef_tax_silva.fasta.gz	Bacteria;Bacteroidetes;Bacteroidia;Bacteroidales;Bacteroidaceae;Bacteroides
SILVA_123_SSURef_tax_silva_full_align_trunc.fasta.gz	Bacteria;Bacteroidetes;Bacteroidia;Bacteroidales;Bacteroidaceae;Bacteroides
SILVA_128_SSURef_tax_silva.fasta.gz	Bacteria;Bacteroidetes;Bacteroidia;Bacteroidales;Bacteroidaceae;Bacteroides
SILVA_128_SSURef_tax_silva_full_align_trunc.fasta.gz	Bacteria;Bacteroidetes;Bacteroidia;Bacteroidales;Bacteroidaceae;Bacteroides
SILVA_132_SSURef_tax_silva.fasta.gz	Bacteria;Bacteroidetes;Bacteroidia;Bacteroidales;Bacteroidaceae;Bacteroides
SILVA_132_SSURef_tax_silva_full_align_trunc.fasta.gz	Bacteria;Bacteroidetes;Bacteroidia;Bacteroidales;Bacteroidaceae;Bacteroides
bac_ssu_r86.1_20180911.fna.gz	Bacteria;Bacteroidota
23	CACGTAAGGTGCGAGCGTTGTTCGGAATTATTGGGCGTAAAGGGCATGCAGGCGGGTCGCCAAGCTTGGT_CCTGTTTGCTCCCCGCACCTTCGCACCTCAGCGTCAGTCGTCCGCCGGTATCCTGCCTTCGCCATCGGTG
SILVA_123_SSURef_tax_silva.fasta.gz	Bacteria;Spirochaetae;Spirochaetes;Spirochaetales;Spirochaetaceae;Treponema_2
SILVA_123_SSURef_tax_silva_full_align_trunc.fasta.gz	Bacteria;Spirochaetae;Spirochaetes;Spirochaetales;Spirochaetaceae;Treponema_2
SILVA_128_SSURef_tax_silva.fasta.gz	Bacteria;Spirochaetae;Spirochaetes;Spirochaetales;Spirochaetaceae;Treponema_2
SILVA_128_SSURef_tax_silva_full_align_trunc.fasta.gz	Bacteria;Spirochaetae;Spirochaetes;Spirochaetales;Spirochaetaceae;Treponema_2
SILVA_132_SSURef_tax_silva.fasta.gz	Bacteria;Spirochaetes;Spirochaetia;Spirochaetales;Spirochaetaceae;Treponema_2
SILVA_132_SSURef_tax_silva_full_align_trunc.fasta.gz	Bacteria;Spirochaetes;Spirochaetia;Spirochaetales;Spirochaetaceae;Treponema_2
bac_ssu_r86.1_20180911.fna.gz	Bacteria;Spirochaetota;Spirochaetia;Treponematales;Treponemataceae;Treponema_D
24	TACGTAGGTCCCGAACGTTGCGCGAAATTACTGGGCGTAAAGGGTCCGTAGGCGGTCTGGTAAGTGGAAG_CCGGTTCGCTCCCCTGGCTTTCGTCCCTCAGCGTCAGGTGCGTCCCAGTCGGCCGCCTTCGCCACCGGTG
SILVA_123_SSURef_tax_silva.fasta.gz	Bacteria;Aquificae;Aquificae;Aquificales;Hydrogenothermaceae;Persephonella
SILVA_123_SSURef_tax_silva_full_align_trunc.fasta.gz	Bacteria;Aquificae;Aquificae;Aquificales;Hydrogenothermaceae;Persephonella
SILVA_128_SSURef_tax_silva.fasta.gz	Bacteria;Aquificae;Aquificae;Aquificales;Hydrogenothermaceae;Persephonella
SILVA_128_SSURef_tax_silva_full_align_trunc.fasta.gz	Bacteria;Aquificae;Aquificae;Aquificales;Hydrogenothermaceae;Persephonella
SILVA_132_SSURef_tax_silva.fasta.gz	Bacteria;Aquificae;Aquificae;Hydrogenothermales;Hydrogenothermaceae;Persephonella
SILVA_132_SSURef_tax_silva_full_align_trunc.fasta.gz	Bacteria;Aquificae;Aquificae;Hydrogenothermales;Hydrogenothermaceae;Persephonella
bac_ssu_r86.1_20180911.fna.gz	Bacteria;Aquificota;Aquificae;Hydrogenothermales;Hydrogenothermaceae;Persephonella
25	TACGAGGGGGGCGAGCGTTGTTCGGAATTATTGGGCGTAAAGGGTGCGTAGGCGGTTCGGTAAGTTTGAT_CCTGTTTGCTCCCCTAGCTTTCGTGCATCAGCGTCAGTTGTGGTCCAGTGAGCCGCTTTCGCCACAGGTG
SILVA_123_SSURef_tax_silva.fasta.gz	Bacteria;Acidobacteria;Acidobacteria;Acidobacteriales;Acidobacteriaceae_(Subgroup_1);Acidobacterium
SILVA_123_SSURef_tax_silva_full_align_trunc.fasta.gz	Bacteria;Acidobacteria;Acidobacteria;Acidobacteriales;Acidobacteriaceae_(Subgroup_1);Acidobacterium
SILVA_128_SSURef_tax_silva.fasta.gz	Bacteria;Acidobacteria;Acidobacteria;Acidobacteriales;Acidobacteriaceae_(Subgroup_1);Acidobacterium
SILVA_128_SSURef_tax_silva_full_align_trunc.fasta.gz	Bacteria;Acidobacteria;Acidobacteria;Acidobacteriales;Acidobacteriaceae_(Subgroup_1);Acidobacterium
SILVA_132_SSURef_tax_silva.fasta.gz	Bacteria;Acidobacteria;Acidobacteriia;Acidobacteriales;Acidobacteriaceae_(Subgroup_1);Acidobacterium
SILVA_132_SSURef_tax_silva_full_align_trunc.fasta.gz	Bacteria;Acidobacteria;Acidobacteriia;Acidobacteriales;Acidobacteriaceae_(Subgroup_1);Acidobacterium
bac_ssu_r86.1_20180911.fna.gz	Bacteria;Acidobacteriota;Acidobacteriae;Acidobacteriales;Acidobacteriaceae;Acidobacterium
26	TACGTAGGGTGCAAGCGTTAATCGGAATTACTGGGCGTAAAGCGTGCGCAGGCGGTTCGCTAAGACAGAT_CCTGTTTGCTCCCCACGCTTTCGTGCATGAGCGTCAGTATTGGCCCAGGGGGCTGCCTTCGCCATCGGTA
SILVA_123_SSURef_tax_silva.fasta.gz	Bacteria;Proteobacteria;Betaproteobacteria;Burkholderiales;Burkholderiaceae;Burkholderia
SILVA_123_SSURef_tax_silva_full_align_trunc.fasta.gz	Bacteria;Proteobacteria;Betaproteobacteria;Burkholderiales;Burkholderiaceae;Burkholderia
SILVA_128_SSURef_tax_silva.fasta.gz	Bacteria;Proteobacteria;Betaproteobacteria;Burkholderiales;Burkholderiaceae;Burkholderia-Paraburkholderia
SILVA_128_SSURef_tax_silva_full_align_trunc.fasta.gz	Bacteria;Proteobacteria;Betaproteobacteria;Burkholderiales;Burkholderiaceae;Burkholderia-Paraburkholderia
SILVA_132_SSURef_tax_silva.fasta.gz	Bacteria;Proteobacteria;Gammaproteobacteria;Betaproteobacteriales;Burkholderiaceae;Burkholderia-Caballeronia-Paraburkholderia
SILVA_132_SSURef_tax_silva_full_align_trunc.fasta.gz	Bacteria;Proteobacteria;Gammaproteobacteria;Betaproteobacteriales;Burkholderiaceae;Burkholderia-Caballeronia-Paraburkholderia
bac_ssu_r86.1_20180911.fna.gz	Bacteria;Proteobacteria;Gammaproteobacteria;Betaproteobacteriales;Burkholderiaceae;Paraburkholderia
27	TACGTAGGTGGCAAGCGTTGTCCGGATTTATTGGGCGTAAAGCGAGCGCAGGCGGTTTCTTAAGTCTGAT_CCTGTTTGCTCCCCACGCTTTCGAGCCTCAGCGTCAATTACAGACCAGAGAGCCGCCTTCGCCACTGGTG
SILVA_123_SSURef_tax_silva.fasta.gz	Bacteria;Firmicutes;Bacilli;Lactobacillales;Enterococcaceae;Enterococcus
SILVA_123_SSURef_tax_silva_full_align_trunc.fasta.gz	Bacteria;Firmicutes;Bacilli;Lactobacillales;Enterococcaceae;Enterococcus
SILVA_128_SSURef_tax_silva.fasta.gz	Bacteria;Firmicutes;Bacilli;Lactobacillales;Enterococcaceae;Enterococcus
SILVA_128_SSURef_tax_silva_full_align_trunc.fasta.gz	Bacteria;Firmicutes;Bacilli;Lactobacillales;Enterococcaceae;Enterococcus
SILVA_132_SSURef_tax_silva.fasta.gz	Bacteria;Firmicutes;Bacilli;Lactobacillales;Enterococcaceae;Enterococcus
SILVA_132_SSURef_tax_silva_full_align_trunc.fasta.gz	Bacteria;Firmicutes;Bacilli;Lactobacillales;Enterococcaceae;Enterococcus
bac_ssu_r86.1_20180911.fna.gz	Bacteria;Firmicutes;Bacilli;Lactobacillales;Enterococcaceae
28	TACGGAGGGTCCGAGCGTTAATCGGAATTACTGGGCGTAAAGCGTGCGCAGGCGGTTTGTTAAGCGAGAT_CCTGTTTGCTCCCCACGCTTTCGTGCCTGAGCGTCAATCTTTGTCCAGGGGGCCGCCTTCGCCACCGGTA
SILVA_123_SSURef_tax_silva.fasta.gz	Bacteria;Proteobacteria;Gammaproteobacteria;Alteromonadales;Shewanellaceae;Shewanella
SILVA_123_SSURef_tax_silva_full_align_trunc.fasta.gz	Bacteria;Proteobacteria;Gammaproteobacteria;Alteromonadales;Shewanellaceae;Shewanella
SILVA_128_SSURef_tax_silva.fasta.gz	Bacteria;Proteobacteria;Gammaproteobacteria;Alteromonadales;Shewanellaceae;Shewanella
SILVA_128_SSURef_tax_silva_full_align_trunc.fasta.gz	Bacteria;Proteobacteria;Gammaproteobacteria;Alteromonadales;Shewanellaceae;Shewanella
SILVA_132_SSURef_tax_silva.fasta.gz	Bacteria;Proteobacteria;Gammaproteobacteria;Alteromonadales;Shewanellaceae;Shewanella
SILVA_132_SSURef_tax_silva_full_align_trunc.fasta.gz	Bacteria;Proteobacteria;Gammaproteobacteria;Alteromonadales;Shewanellaceae;Shewanella
bac_ssu_r86.1_20180911.fna.gz	Bacteria;Proteobacteria;Gammaproteobacteria;Enterobacterales;Shewanellaceae;Shewanella
29	GACAGAGGGGGCAAGCGTTGTCCGGAGTTACTGGGCGTAAAGGGCGCGCAGGCGGTGGGCTGCGTCGGCG_CCGGTTTGCTCCCCACGCTGTCGCGCCGCAGCGTCAGGTCAAGCCCAGGTGGCCGGCTTCCCCACCGGCG
SILVA_123_SSURef_tax_silva.fasta.gz	Bacteria;Chloroflexi;Chloroflexia;Chloroflexales;Chloroflexaceae;Chloroflexus
SILVA_123_SSURef_tax_silva_full_align_trunc.fasta.gz	Bacteria;Chloroflexi;Chloroflexia;Chloroflexales;Chloroflexaceae;Chloroflexus
SILVA_128_SSURef_tax_silva.fasta.gz	Bacteria;Chloroflexi;Chloroflexia;Chloroflexales;Chloroflexaceae;Chloroflexus
SILVA_128_SSURef_tax_silva_full_align_trunc.fasta.gz	Bacteria;Chloroflexi;Chloroflexia;Chloroflexales;Chloroflexaceae;Chloroflexus
SILVA_132_SSURef_tax_silva.fasta.gz	Bacteria;Chloroflexi;Chloroflexia;Chloroflexales;Chloroflexaceae;Chloroflexus
SILVA_132_SSURef_tax_silva_full_align_trunc.fasta.gz	Bacteria;Chloroflexi;Chloroflexia;Chloroflexales;Chloroflexaceae;Chloroflexus
bac_ssu_r86.1_20180911.fna.gz	Bacteria;Chloroflexota;Chloroflexia;Chloroflexales;Chloroflexaceae;Chloroflexus
30	TACGGAGGGGGTTAGCGTTGTTCGGAATTACTGGGCGTAAAGCGTACGTAGGCGGATTGGAAAGTTGGGG_CCTGTTTGCTCCCCACACTTTCGTACCTCAGCGTCAATATCGAGCCAGTGAGCCGCCTTCGCCACTGGTG
SILVA_123_SSURef_tax_silva.fasta.gz	Bacteria;Proteobacteria;Alphaproteobacteria;Rhodobacterales;Rhodobacteraceae;Sulfitobacter
SILVA_123_SSURef_tax_silva_full_align_trunc.fasta.gz	Bacteria;Proteobacteria;Alphaproteobacteria;Rhodobacterales;Rhodobacteraceae;Sulfitobacter
SILVA_128_SSURef_tax_silva.fasta.gz	Bacteria;Proteobacteria;Alphaproteobacteria;Rhodobacterales;Rhodobacteraceae;Sulfitobacter
SILVA_128_SSURef_tax_silva_full_align_trunc.fasta.gz	Bacteria;Proteobacteria;Alphaproteobacteria;Rhodobacterales;Rhodobacteraceae;Sulfitobacter
SILVA_132_SSURef_tax_silva.fasta.gz	Bacteria;Proteobacteria;Alphaproteobacteria;Rhodobacterales;Rhodobacteraceae;Sulfitobacter
SILVA_132_SSURef_tax_silva_full_align_trunc.fasta.gz	Bacteria;Proteobacteria;Alphaproteobacteria;Rhodobacterales;Rhodobacteraceae;Sulfitobacter
bac_ssu_r86.1_20180911.fna.gz	Bacteria;Proteobacteria;Alphaproteobacteria;Rhodobacterales;Rhodobacteraceae;Sulfitobacter
31	GACGTAGGGCGCAAGCGTTGTCCGGATTTATTGGGCGTAAAGAGCTCGTAGGCGGCTTGTCGCGTCGACT_CCTGTTCGCTCCCCACGCTTTCGCTCCTCAGCGTCAGTATCGGCCCAGAGACCCGCCTTCGCCACCGGTG
SILVA_123_SSURef_tax_silva.fasta.gz	Bacteria;Actinobacteria;Actinobacteria;Micromonosporales;Micromonosporaceae
SILVA_123_SSURef_tax_silva_full_align_trunc.fasta.gz	Bacteria;Actinobacteria;Actinobacteria;Micromonosporales;Micromonosporaceae
SILVA_128_SSURef_tax_silva.fasta.gz	Bacteria;Actinobacteria;Actinobacteria;Micromonosporales;Micromonosporaceae;Salinispora
SILVA_128_SSURef_tax_silva_full_align_trunc.fasta.gz	Bacteria;Actinobacteria;Actinobacteria;Micromonosporales;Micromonosporaceae;Salinispora
SILVA_132_SSURef_tax_silva.fasta.gz	Bacteria;Actinobacteria;Actinobacteria;Micromonosporales;Micromonosporaceae;Salinispora
SILVA_132_SSURef_tax_silva_full_align_trunc.fasta.gz	Bacteria;Actinobacteria;Actinobacteria;Micromonosporales;Micromonosporaceae;Salinispora
bac_ssu_r86.1_20180911.fna.gz	Bacteria;Actinobacteriota;Actinobacteria;Corynebacteriales;Micromonosporaceae;Micromonospora
32	TACGTAGGTCCCGAACGTTGCGCGAATTTACTGGGCGTAAAGGGTCCGTAGGCGGTTTAGCAAGTGGTTG_CCGGTTTGCTCCCCTAGCTTTCGTCCCTCAGCGTCAAGACAGTTCCAGTCGGCCGCCTTCGCCACTGGTG
SILVA_123_SSURef_tax_silva.fasta.gz	Bacteria;Aquificae;Aquificae;Aquificales;Hydrogenothermaceae;Sulfurihydrogenibium
SILVA_123_SSURef_tax_silva_full_align_trunc.fasta.gz	Bacteria;Aquificae;Aquificae;Aquificales;Hydrogenothermaceae;Sulfurihydrogenibium
SILVA_128_SSURef_tax_silva.fasta.gz	Bacteria;Aquificae;Aquificae;Aquificales;Hydrogenothermaceae;Sulfurihydrogenibium
SILVA_128_SSURef_tax_silva_full_align_trunc.fasta.gz	Bacteria;Aquificae;Aquificae;Aquificales;Hydrogenothermaceae;Sulfurihydrogenibium
SILVA_132_SSURef_tax_silva.fasta.gz	Bacteria;Aquificae;Aquificae;Hydrogenothermales;Hydrogenothermaceae;Sulfurihydrogenibium
SILVA_132_SSURef_tax_silva_full_align_trunc.fasta.gz	Bacteria;Aquificae;Aquificae;Hydrogenothermales;Hydrogenothermaceae;Sulfurihydrogenibium
bac_ssu_r86.1_20180911.fna.gz	Bacteria;Aquificota;Aquificae;Hydrogenothermales;Hydrogenothermaceae;Sulfurihydrogenibium
33	CACGTAAGGGGCGAGCGTTGTTCGGAATTATTGGGCGTAAAGGGTATGTAGGCGGTTAGGTAAGCCTGGT_CCTGTTTGCTCCCCGCACCTTCGTATATCAGCGTCAATCATCGGCCAGAAACCCGCCTTCGCCACCGGTG
SILVA_123_SSURef_tax_silva.fasta.gz	Bacteria;Spirochaetae;Spirochaetes;Spirochaetales;Spirochaetaceae;Treponema_2
SILVA_123_SSURef_tax_silva_full_align_trunc.fasta.gz	Bacteria;Spirochaetae;Spirochaetes;Spirochaetales;Spirochaetaceae;Treponema_2
SILVA_128_SSURef_tax_silva.fasta.gz	Bacteria;Spirochaetae;Spirochaetes;Spirochaetales;Spirochaetaceae;Treponema_2
SILVA_128_SSURef_tax_silva_full_align_trunc.fasta.gz	Bacteria;Spirochaetae;Spirochaetes;Spirochaetales;Spirochaetaceae;Treponema_2
SILVA_132_SSURef_tax_silva.fasta.gz	Bacteria;Spirochaetes;Spirochaetia;Spirochaetales;Spirochaetaceae;Treponema_2
SILVA_132_SSURef_tax_silva_full_align_trunc.fasta.gz	Bacteria;Spirochaetes;Spirochaetia;Spirochaetales;Spirochaetaceae;Treponema_2
bac_ssu_r86.1_20180911.fna.gz	Bacteria;Spirochaetota;Spirochaetia;Treponematales;Treponemataceae;Treponema_B
34	TACGTAGGTGGCGAGCGTTGTCCGGAATTACTGGGCGTAAAGGGTGCGTAGGCGGCTATGCGAGTTAAGC_CCTGTTCGCTCCCCACGCTTTCGTGCCTCAGCGTCAATTACGGTCCAGACGGCCGCCTTCGCCACTGGTG
SILVA_123_SSURef_tax_silva.fasta.gz	Bacteria;Firmicutes;Clostridia;Thermoanaerobacterales;Family_III;Caldicellulosiruptor
SILVA_123_SSURef_tax_silva_full_align_trunc.fasta.gz	Bacteria;Firmicutes;Clostridia;Thermoanaerobacterales;Family_III;Caldicellulosiruptor
SILVA_128_SSURef_tax_silva.fasta.gz	Bacteria;Firmicutes;Clostridia;Thermoanaerobacterales;Family_III;Caldicellulosiruptor
SILVA_128_SSURef_tax_silva_full_align_trunc.fasta.gz	Bacteria;Firmicutes;Clostridia;Thermoanaerobacterales;Family_III;Caldicellulosiruptor
SILVA_132_SSURef_tax_silva.fasta.gz	Bacteria;Firmicutes;Clostridia;Thermoanaerobacterales;Family_III;Caldicellulosiruptor
SILVA_132_SSURef_tax_silva_full_align_trunc.fasta.gz	Bacteria;Firmicutes;Clostridia;Thermoanaerobacterales;Family_III;Caldicellulosiruptor
bac_ssu_r86.1_20180911.fna.gz	Bacteria;Firmicutes_A;Thermoanaerobacteria;Caldicellulosiruptorales;Caldicellulosiruptoraceae;Caldicellulosiruptor
35	TACCGGCGGCCCAAGTGGTGGCCACTGTTATTGGGCCTAAAGCGTCCGTAGCCGGCCCGGTAAGTCTCTG_CCGGTTTGCTCCCCTGGCCTTCGTCCCTCACCGTCGGACCCGTTCCAGCCGGGCGCCTTCGCCACAGGTG
SILVA_123_SSURef_tax_silva.fasta.gz	Archaea;Euryarchaeota;Methanococci;Methanococcales;Methanocaldococcaceae;Methanocaldococcus
SILVA_123_SSURef_tax_silva_full_align_trunc.fasta.gz	Archaea;Euryarchaeota;Methanococci;Methanococcales;Methanocaldococcaceae;Methanocaldococcus
SILVA_128_SSURef_tax_silva.fasta.gz	Archaea;Euryarchaeota;Methanococci;Methanococcales;Methanocaldococcaceae;Methanocaldococcus
SILVA_128_SSURef_tax_silva_full_align_trunc.fasta.gz	Archaea;Euryarchaeota;Methanococci;Methanococcales;Methanocaldococcaceae;Methanocaldococcus
SILVA_132_SSURef_tax_silva.fasta.gz	Archaea;Euryarchaeota;Methanococci;Methanococcales;Methanocaldococcaceae;Methanocaldococcus
SILVA_132_SSURef_tax_silva_full_align_trunc.fasta.gz	Archaea;Euryarchaeota;Methanococci;Methanococcales;Methanocaldococcaceae;Methanocaldococcus
SILVA_132_SSURef_tax_silva_full_align_trunc.fasta.gz
36	TACGTAGGTGGCGAGCGTTGTCCGGAATTACTGGGCGTAAAGGGTGCGTAGGCGGCTATGCGAGTTAAGC_CCTGTTCGCTCCCCACGCTTTCGTGCCTCAGCGTCAGTTACGGTCCAGACGGCCGCCTTCGCCACTGGTG
SILVA_123_SSURef_tax_silva.fasta.gz	Bacteria;Firmicutes;Clostridia;Thermoanaerobacterales;Family_III;Caldicellulosiruptor
SILVA_123_SSURef_tax_silva_full_align_trunc.fasta.gz	Bacteria;Firmicutes;Clostridia;Thermoanaerobacterales;Family_III;Caldicellulosiruptor
SILVA_128_SSURef_tax_silva.fasta.gz	Bacteria;Firmicutes;Clostridia;Thermoanaerobacterales;Family_III;Caldicellulosiruptor
SILVA_128_SSURef_tax_silva_full_align_trunc.fasta.gz	Bacteria;Firmicutes;Clostridia;Thermoanaerobacterales;Family_III;Caldicellulosiruptor
SILVA_132_SSURef_tax_silva.fasta.gz	Bacteria;Firmicutes;Clostridia;Thermoanaerobacterales;Family_III;Caldicellulosiruptor
SILVA_132_SSURef_tax_silva_full_align_trunc.fasta.gz	Bacteria;Firmicutes;Clostridia;Thermoanaerobacterales;Family_III;Caldicellulosiruptor
bac_ssu_r86.1_20180911.fna.gz	Bacteria;Firmicutes_A;Thermoanaerobacteria;Caldicellulosiruptorales;Caldicellulosiruptoraceae;Caldicellulosiruptor
37	TACGGAGGGGGTTAGCGTTGTTCGGAATTACTGGGCGTAAAGCGCGCGTAGGCGGACCAGAAAGTTGGGG_CCTGTTTGCTCCCCACACTTTCGCACCTCAGCGTCAGTATCGAGCCAGTGAGCCGCCTTCGCCACTGGTG
SILVA_123_SSURef_tax_silva.fasta.gz	Bacteria;Proteobacteria;Alphaproteobacteria;Rhodobacterales;Rhodobacteraceae
SILVA_123_SSURef_tax_silva_full_align_trunc.fasta.gz	Bacteria;Proteobacteria;Alphaproteobacteria;Rhodobacterales;Rhodobacteraceae
SILVA_128_SSURef_tax_silva.fasta.gz	Bacteria;Proteobacteria;Alphaproteobacteria;Rhodobacterales;Rhodobacteraceae
SILVA_128_SSURef_tax_silva_full_align_trunc.fasta.gz	Bacteria;Proteobacteria;Alphaproteobacteria;Rhodobacterales;Rhodobacteraceae
SILVA_132_SSURef_tax_silva.fasta.gz	Bacteria;Proteobacteria;Alphaproteobacteria;Rhodobacterales;Rhodobacteraceae
SILVA_132_SSURef_tax_silva_full_align_trunc.fasta.gz	Bacteria;Proteobacteria;Alphaproteobacteria;Rhodobacterales;Rhodobacteraceae
bac_ssu_r86.1_20180911.fna.gz	Bacteria;Proteobacteria;Alphaproteobacteria;Rhodobacterales;Rhodobacteraceae
38	TACGTAGGGTGCAAGCGTTAATCGGAATTACTGGGCGTAAAGCGTGCGCAGGCGGTTCGGAAAGAAAGAT_CCTGTTTGCTCCCCACGCTTTCGTGCATGAGCGTCAGTGTTATCCCAGGAGGCTGCCTTCGCCATCGGTG
SILVA_123_SSURef_tax_silva.fasta.gz	Bacteria;Proteobacteria;Betaproteobacteria;Burkholderiales;Alcaligenaceae
SILVA_123_SSURef_tax_silva_full_align_trunc.fasta.gz	Bacteria;Proteobacteria;Betaproteobacteria;Burkholderiales;Alcaligenaceae
SILVA_128_SSURef_tax_silva.fasta.gz	Bacteria;Proteobacteria;Betaproteobacteria;Burkholderiales;Alcaligenaceae
SILVA_128_SSURef_tax_silva_full_align_trunc.fasta.gz	Bacteria;Proteobacteria;Betaproteobacteria;Burkholderiales;Alcaligenaceae
SILVA_132_SSURef_tax_silva.fasta.gz	Bacteria;Proteobacteria;Gammaproteobacteria;Betaproteobacteriales;Burkholderiaceae
SILVA_132_SSURef_tax_silva_full_align_trunc.fasta.gz	Bacteria;Proteobacteria;Gammaproteobacteria;Betaproteobacteriales;Burkholderiaceae
bac_ssu_r86.1_20180911.fna.gz	Bacteria;Proteobacteria;Gammaproteobacteria;Betaproteobacteriales;Burkholderiaceae
39	TACGTAGGTCCCGAGCGTTGCGCGATGTTACTGGGCGTAAAGCGTCCGTAGCTGGTTTCGTAAGCAGATT_CCGGTTTGCTCCCCCAGCTTTCGTCCATGACCGTCAGTACCGTCCCAGTAGGCCGCCTTCGCCACTGGTG
SILVA_123_SSURef_tax_silva.fasta.gz	Bacteria;Aquificae;Aquificae;Aquificales;Aquificaceae;Hydrogenobaculum
SILVA_123_SSURef_tax_silva_full_align_trunc.fasta.gz	Bacteria;Aquificae;Aquificae;Aquificales;Aquificaceae;Hydrogenobaculum
SILVA_128_SSURef_tax_silva.fasta.gz	Bacteria;Aquificae;Aquificae;Aquificales;Aquificaceae;Hydrogenobaculum
SILVA_128_SSURef_tax_silva_full_align_trunc.fasta.gz	Bacteria;Aquificae;Aquificae;Aquificales;Aquificaceae;Hydrogenobaculum
SILVA_132_SSURef_tax_silva.fasta.gz	Bacteria;Aquificae;Aquificae;Aquificales;Hydrogenobaculaceae;Hydrogenobaculum
SILVA_132_SSURef_tax_silva_full_align_trunc.fasta.gz	Bacteria;Aquificae;Aquificae;Aquificales;Hydrogenobaculaceae;Hydrogenobaculum
bac_ssu_r86.1_20180911.fna.gz	Bacteria;Aquificota;Aquificae;Aquificales;Hydrogenobaculaceae;Hydrogenobaculum
40	TACGTAGGTCCCGAACGTTGCGCGAAATTACTGGGCGTAAAGGGTCCGTAGGCGGTCTGGTAAGTGGAAG_CCGGTTCGCTCCCCTGGCTTTCGTCCCTCAGCGTCAAGTGCGTCCCAGTCGGCCGCCTTCGCCACCGGTG
SILVA_123_SSURef_tax_silva.fasta.gz	Bacteria;Aquificae;Aquificae;Aquificales;Hydrogenothermaceae;Persephonella
SILVA_123_SSURef_tax_silva_full_align_trunc.fasta.gz	Bacteria;Aquificae;Aquificae;Aquificales;Hydrogenothermaceae;Persephonella
SILVA_128_SSURef_tax_silva.fasta.gz	Bacteria;Aquificae;Aquificae;Aquificales;Hydrogenothermaceae;Persephonella
SILVA_128_SSURef_tax_silva_full_align_trunc.fasta.gz	Bacteria;Aquificae;Aquificae;Aquificales;Hydrogenothermaceae;Persephonella
SILVA_132_SSURef_tax_silva.fasta.gz	Bacteria;Aquificae;Aquificae;Hydrogenothermales;Hydrogenothermaceae;Persephonella
SILVA_132_SSURef_tax_silva_full_align_trunc.fasta.gz	Bacteria;Aquificae;Aquificae;Hydrogenothermales;Hydrogenothermaceae;Persephonella
bac_ssu_r86.1_20180911.fna.gz	Bacteria;Aquificota;Aquificae;Hydrogenothermales;Hydrogenothermaceae;Persephonella
41	TACGTAGGTGGCAAGCGTTGTCCGGATTTATTGGGCGTAAAGCGAGCGCAGGCGGTTTCTTAAGTCTGAT_CCTGTTTGCTCCCCACGCTTTCGAGCCTCAGCGTCAGTTACAGACCAGAGAGCCGCCTTCGCCACTGGTG
SILVA_123_SSURef_tax_silva.fasta.gz	Bacteria;Firmicutes;Bacilli;Lactobacillales;Enterococcaceae;Enterococcus
SILVA_123_SSURef_tax_silva_full_align_trunc.fasta.gz	Bacteria;Firmicutes;Bacilli;Lactobacillales;Enterococcaceae;Enterococcus
SILVA_128_SSURef_tax_silva.fasta.gz	Bacteria;Firmicutes;Bacilli;Lactobacillales;Enterococcaceae;Enterococcus
SILVA_128_SSURef_tax_silva_full_align_trunc.fasta.gz	Bacteria;Firmicutes;Bacilli;Lactobacillales;Enterococcaceae;Enterococcus
SILVA_132_SSURef_tax_silva.fasta.gz	Bacteria;Firmicutes;Bacilli;Lactobacillales;Enterococcaceae;Enterococcus
SILVA_132_SSURef_tax_silva_full_align_trunc.fasta.gz	Bacteria;Firmicutes;Bacilli;Lactobacillales;Enterococcaceae;Enterococcus
bac_ssu_r86.1_20180911.fna.gz	Bacteria;Firmicutes;Bacilli;Lactobacillales;Enterococcaceae
42	CACCGACGGCCCGAGTGGTGGCCACTTTTATTGGGCCTAAAGCGTCCGTAGCCGGTCCAGTAAGTCCTTG_CCGGTTCGCGCCCCTGGCTTTCGTCCCTCACCGTCGGACCCGTTCCAGACAAGTGCCTTCGCCATAGGTG
SILVA_123_SSURef_tax_silva.fasta.gz	Archaea;Euryarchaeota;Methanococci;Methanococcales;Methanococcaceae;Methanococcus
SILVA_123_SSURef_tax_silva_full_align_trunc.fasta.gz	Archaea;Euryarchaeota;Methanococci;Methanococcales;Methanococcaceae;Methanococcus
SILVA_128_SSURef_tax_silva.fasta.gz	Archaea;Euryarchaeota;Methanococci;Methanococcales;Methanococcaceae;Methanococcus
SILVA_128_SSURef_tax_silva_full_align_trunc.fasta.gz	Archaea;Euryarchaeota;Methanococci;Methanococcales;Methanococcaceae;Methanococcus
SILVA_132_SSURef_tax_silva.fasta.gz	Archaea;Euryarchaeota;Methanococci;Methanococcales;Methanococcaceae;Methanococcus
SILVA_132_SSURef_tax_silva_full_align_trunc.fasta.gz	Archaea;Euryarchaeota;Methanococci;Methanococcales;Methanococcaceae;Methanococcus
SILVA_132_SSURef_tax_silva_full_align_trunc.fasta.gz
43	TACGTATGTCACAAGCGTTATCCGGATTTATTGGGCGTAAAGCGCGTCTAGGTGGTTATATAAGTCTGAT_CCTGTTTGCTACCCACGCTTTCGCGCTTCAGCGTCAGTATCTGTCCAGTAAGCTGGCTTCCCCATCGGCA
SILVA_123_SSURef_tax_silva.fasta.gz	Bacteria;Fusobacteria;Fusobacteriia;Fusobacteriales;Fusobacteriaceae;Fusobacterium
SILVA_123_SSURef_tax_silva_full_align_trunc.fasta.gz	Bacteria;Fusobacteria;Fusobacteriia;Fusobacteriales;Fusobacteriaceae;Fusobacterium
SILVA_128_SSURef_tax_silva.fasta.gz	Bacteria;Fusobacteria;Fusobacteriia;Fusobacteriales;Fusobacteriaceae;Fusobacterium
SILVA_128_SSURef_tax_silva_full_align_trunc.fasta.gz	Bacteria;Fusobacteria;Fusobacteriia;Fusobacteriales;Fusobacteriaceae;Fusobacterium
SILVA_132_SSURef_tax_silva.fasta.gz	Bacteria;Fusobacteria;Fusobacteriia;Fusobacteriales;Fusobacteriaceae;Fusobacterium
SILVA_132_SSURef_tax_silva_full_align_trunc.fasta.gz	Bacteria;Fusobacteria;Fusobacteriia;Fusobacteriales;Fusobacteriaceae;Fusobacterium
bac_ssu_r86.1_20180911.fna.gz	Bacteria;Fusobacteriota;Fusobacteriia;Fusobacteriales;Fusobacteriaceae;Fusobacterium
44	TACGGAGGGCGCGAGCGTTACCCGGATTCACTGGGCGTAAAGGGCGTGTAGGCGGCCTGGGGCGTCCCAT_CCGGTTTGCTCCCCACGCTTTCGCGCCTCAGCGTCACGGGTGGACCAGGTGGCTGCCTTCGCCATCGGCG
SILVA_123_SSURef_tax_silva.fasta.gz	Bacteria;Deinococcus-Thermus;Deinococci;Thermales;Thermaceae;Thermus
SILVA_123_SSURef_tax_silva_full_align_trunc.fasta.gz	Bacteria;Deinococcus-Thermus;Deinococci;Thermales;Thermaceae;Thermus
SILVA_128_SSURef_tax_silva.fasta.gz	Bacteria;Deinococcus-Thermus;Deinococci;Thermales;Thermaceae;Thermus
SILVA_128_SSURef_tax_silva_full_align_trunc.fasta.gz	Bacteria;Deinococcus-Thermus;Deinococci;Thermales;Thermaceae;Thermus
SILVA_132_SSURef_tax_silva.fasta.gz	Bacteria;Deinococcus-Thermus;Deinococci;Thermales;Thermaceae;Thermus
SILVA_132_SSURef_tax_silva_full_align_trunc.fasta.gz	Bacteria;Deinococcus-Thermus;Deinococci;Thermales;Thermaceae;Thermus
bac_ssu_r86.1_20180911.fna.gz	Bacteria;Deinococcota;Deinococci;Deinococcales;Thermaceae;Thermus
45	TACGTAGGGGCCAAGCGTTGTCCGGAATTACTGGGCGTAAAGCGTGGGTAGGTGGTCGATGATGTGCCGC_CCTGTTTGCTCCCCACGCCGTCGTGGCTCAGTGTCAGGTCTCGCCCAGAACGCCGCTTGCGCCACTGGTG
SILVA_123_SSURef_tax_silva.fasta.gz	Bacteria;Chloroflexi;Chloroflexia;Herpetosiphonales;Herpetosiphonaceae;Herpetosiphon
SILVA_123_SSURef_tax_silva_full_align_trunc.fasta.gz	Bacteria;Chloroflexi;Chloroflexia;Herpetosiphonales;Herpetosiphonaceae;Herpetosiphon
SILVA_128_SSURef_tax_silva.fasta.gz	Bacteria;Chloroflexi;Chloroflexia;Herpetosiphonales;Herpetosiphonaceae;Herpetosiphon
SILVA_128_SSURef_tax_silva_full_align_trunc.fasta.gz	Bacteria;Chloroflexi;Chloroflexia;Herpetosiphonales;Herpetosiphonaceae;Herpetosiphon
SILVA_132_SSURef_tax_silva.fasta.gz	Bacteria;Chloroflexi;Chloroflexia;Chloroflexales;Herpetosiphonaceae;Herpetosiphon
SILVA_132_SSURef_tax_silva_full_align_trunc.fasta.gz	Bacteria;Chloroflexi;Chloroflexia;Chloroflexales;Herpetosiphonaceae;Herpetosiphon
bac_ssu_r86.1_20180911.fna.gz	Bacteria;Chloroflexota;Chloroflexia;Chloroflexales;Herpetosiphonaceae;Herpetosiphon
46	TACGGAGGATCCGAGCGTTATCCGGATTTATTGGGTTTAAAGGGAGCGTAGATGGATATTTAAGTCAGTT_CCTGTTTGATACCCACACTTTCGAGCCTCAATGTCAGTTGCAGCTTAGCAGGCTGCCTTCGCAATCGGAG
SILVA_123_SSURef_tax_silva.fasta.gz	Bacteria;Bacteroidetes;Bacteroidia;Bacteroidales;Bacteroidaceae;Bacteroides
SILVA_123_SSURef_tax_silva_full_align_trunc.fasta.gz	Bacteria;Bacteroidetes;Bacteroidia;Bacteroidales;Bacteroidaceae;Bacteroides
SILVA_128_SSURef_tax_silva.fasta.gz	Bacteria;Bacteroidetes;Bacteroidia;Bacteroidales;Bacteroidaceae;Bacteroides
SILVA_128_SSURef_tax_silva_full_align_trunc.fasta.gz	Bacteria;Bacteroidetes;Bacteroidia;Bacteroidales;Bacteroidaceae;Bacteroides
SILVA_132_SSURef_tax_silva.fasta.gz	Bacteria;Bacteroidetes;Bacteroidia;Bacteroidales;Bacteroidaceae;Bacteroides
SILVA_132_SSURef_tax_silva_full_align_trunc.fasta.gz	Bacteria;Bacteroidetes;Bacteroidia;Bacteroidales;Bacteroidaceae;Bacteroides
bac_ssu_r86.1_20180911.fna.gz	Bacteria;Bacteroidota
47	TACGGAGGGTGCAAGCGTTAATCGGAATCACTGGGCGTAAAGCGCACGTAGGCTGTTATGTAAGTCAGGG_CCTGTTTGCTCCCCACGCTTTCGCACCTCAGCGTCAATACCGGTCCAGGTGGCCGCCTTCGCCACTGATG
SILVA_123_SSURef_tax_silva.fasta.gz	Bacteria;Proteobacteria;Deltaproteobacteria;Desulfovibrionales;Desulfovibrionaceae;Desulfovibrio
SILVA_123_SSURef_tax_silva_full_align_trunc.fasta.gz	Bacteria;Proteobacteria;Deltaproteobacteria;Desulfovibrionales;Desulfovibrionaceae;Desulfovibrio
SILVA_128_SSURef_tax_silva.fasta.gz	Bacteria;Proteobacteria;Deltaproteobacteria;Desulfovibrionales;Desulfovibrionaceae;Desulfovibrio
SILVA_128_SSURef_tax_silva_full_align_trunc.fasta.gz	Bacteria;Proteobacteria;Deltaproteobacteria;Desulfovibrionales;Desulfovibrionaceae;Desulfovibrio
SILVA_132_SSURef_tax_silva.fasta.gz	Bacteria;Proteobacteria;Deltaproteobacteria;Desulfovibrionales;Desulfovibrionaceae;Desulfovibrio
SILVA_132_SSURef_tax_silva_full_align_trunc.fasta.gz	Bacteria;Proteobacteria;Deltaproteobacteria;Desulfovibrionales;Desulfovibrionaceae;Desulfovibrio
bac_ssu_r86.1_20180911.fna.gz	Bacteria;Desulfobacterota;Desulfovibrionia;Desulfovibrionales;Desulfovibrionaceae;Desulfovibrio
48	TACGGAGGGTGCGAGCGTTGTCCGGAATCACTGGGCGTAAAGGGCGCGTAGGCGGTCTGCTAAGCGTGTG_CCTGTTTGCTCCCCACGCTATCGCGCCTCAGCGTCAGCTACTGCCCAGCAGGCCGCCTTCGCCACTGGTG
SILVA_123_SSURef_tax_silva.fasta.gz	Bacteria;Gemmatimonadetes;Gemmatimonadetes;Gemmatimonadales;Gemmatimonadaceae;Gemmatimonas
SILVA_123_SSURef_tax_silva_full_align_trunc.fasta.gz	Bacteria;Gemmatimonadetes;Gemmatimonadetes;Gemmatimonadales;Gemmatimonadaceae;Gemmatimonas
SILVA_128_SSURef_tax_silva.fasta.gz	Bacteria;Gemmatimonadetes;Gemmatimonadetes;Gemmatimonadales;Gemmatimonadaceae;Gemmatimonas
SILVA_128_SSURef_tax_silva_full_align_trunc.fasta.gz	Bacteria;Gemmatimonadetes;Gemmatimonadetes;Gemmatimonadales;Gemmatimonadaceae;Gemmatimonas
SILVA_132_SSURef_tax_silva.fasta.gz	Bacteria;Gemmatimonadetes;Gemmatimonadetes;Gemmatimonadales;Gemmatimonadaceae;Gemmatimonas
SILVA_132_SSURef_tax_silva_full_align_trunc.fasta.gz	Bacteria;Gemmatimonadetes;Gemmatimonadetes;Gemmatimonadales;Gemmatimonadaceae;Gemmatimonas
bac_ssu_r86.1_20180911.fna.gz	Bacteria;Gemmatimonadota;Gemmatimonadetes;Gemmatimonadales;Gemmatimonadaceae;Gemmatimonas
49	GACGTAGGGGGCGAGCGTTGTCCGGAATTACTGGGCGTAAAGGGCGCGTAGGCGGCCGTTCAAGTCAGGT_CCTGTTTGCTCCCCACGCTTTCGCGCCTCAGCGTCAAGGTCAGTCCAGAGAGTCGCCTTCGCCACTGGTA
SILVA_123_SSURef_tax_silva.fasta.gz	Bacteria;Firmicutes;Clostridia;Thermoanaerobacterales;Thermoanaerobacteraceae;Thermoanaerobacter
SILVA_123_SSURef_tax_silva_full_align_trunc.fasta.gz	Bacteria;Firmicutes;Clostridia;Thermoanaerobacterales;Thermoanaerobacteraceae;Thermoanaerobacter
SILVA_128_SSURef_tax_silva.fasta.gz	Bacteria;Firmicutes;Clostridia;Thermoanaerobacterales;Thermoanaerobacteraceae;Thermoanaerobacter
SILVA_128_SSURef_tax_silva_full_align_trunc.fasta.gz	Bacteria;Firmicutes;Clostridia;Thermoanaerobacterales;Thermoanaerobacteraceae;Thermoanaerobacter
SILVA_132_SSURef_tax_silva.fasta.gz	Bacteria;Firmicutes;Clostridia;Thermoanaerobacterales;Thermoanaerobacteraceae;Thermoanaerobacter
SILVA_132_SSURef_tax_silva_full_align_trunc.fasta.gz	Bacteria;Firmicutes;Clostridia;Thermoanaerobacterales;Thermoanaerobacteraceae;Thermoanaerobacter
bac_ssu_r86.1_20180911.fna.gz	Bacteria;Firmicutes_A;Thermoanaerobacteria;Thermoanaerobacterales;Thermoanaerobacteraceae;Thermoanaerobacter
50	TACGTAGGTGGCGAGCGTTGTCCGGAATTACTGGGTGTAAAGGGCGCGTAGGCGGGGATGCAAGTCAGAT_CCTGTTTGCTCCCCACGCTTTCGCGCCTCAGCGTCAGTTACTGTCCAGAAAGCCGCCTTCGCCACTGGTG
SILVA_123_SSURef_tax_silva.fasta.gz	Bacteria;Firmicutes;Clostridia;Clostridiales;Ruminococcaceae;Ruminiclostridium
SILVA_123_SSURef_tax_silva_full_align_trunc.fasta.gz	Bacteria;Firmicutes;Clostridia;Clostridiales;Ruminococcaceae;Ruminiclostridium
SILVA_128_SSURef_tax_silva.fasta.gz	Bacteria;Firmicutes;Clostridia;Clostridiales;Ruminococcaceae;Ruminiclostridium
SILVA_128_SSURef_tax_silva_full_align_trunc.fasta.gz	Bacteria;Firmicutes;Clostridia;Clostridiales;Ruminococcaceae;Ruminiclostridium
SILVA_132_SSURef_tax_silva.fasta.gz	Bacteria;Firmicutes;Clostridia;Clostridiales;Ruminococcaceae;Ruminiclostridium
SILVA_132_SSURef_tax_silva_full_align_trunc.fasta.gz	Bacteria;Firmicutes;Clostridia;Clostridiales;Ruminococcaceae;Ruminiclostridium
bac_ssu_r86.1_20180911.fna.gz	Bacteria;Firmicutes_A;Clostridia;Acetivibrionales;Acetivibrionaceae
51	GACGTAGGGGGCGAGCGTTGTCCGGAATTACTGGGCGTAAAGGGCGCGTAGGCGGCCGTTCAAGTCAGGT_CCTGTTTGCTCCCCACGCTTTCGCGCCTCAGCGTCAGGGTCAGTCCAGAGAGTCGCCTTCGCCACTGGTA
SILVA_123_SSURef_tax_silva.fasta.gz	Bacteria;Firmicutes;Clostridia;Thermoanaerobacterales;Thermoanaerobacteraceae;Thermoanaerobacter
SILVA_123_SSURef_tax_silva_full_align_trunc.fasta.gz	Bacteria;Firmicutes;Clostridia;Thermoanaerobacterales;Thermoanaerobacteraceae;Thermoanaerobacter
SILVA_128_SSURef_tax_silva.fasta.gz	Bacteria;Firmicutes;Clostridia;Thermoanaerobacterales;Thermoanaerobacteraceae;Thermoanaerobacter
SILVA_128_SSURef_tax_silva_full_align_trunc.fasta.gz	Bacteria;Firmicutes;Clostridia;Thermoanaerobacterales;Thermoanaerobacteraceae;Thermoanaerobacter
SILVA_132_SSURef_tax_silva.fasta.gz	Bacteria;Firmicutes;Clostridia;Thermoanaerobacterales;Thermoanaerobacteraceae;Thermoanaerobacter
SILVA_132_SSURef_tax_silva_full_align_trunc.fasta.gz	Bacteria;Firmicutes;Clostridia;Thermoanaerobacterales;Thermoanaerobacteraceae;Thermoanaerobacter
bac_ssu_r86.1_20180911.fna.gz	Bacteria;Firmicutes_A;Thermoanaerobacteria;Thermoanaerobacterales;Thermoanaerobacteraceae;Thermoanaerobacter
52	CACCGACGGCCCGAGTGGTGGCCACTTTTATTGGGCCTAAAGCGTCCGTAGCCGGTCCAGTAAGTCCCTG_CCGGTTCGCGCCCCTGGCTTTCGTCCCTCACCGTCGGACCCGTTCCAGACAAGTGCCTTCGCCATAGGTG
SILVA_123_SSURef_tax_silva.fasta.gz	Archaea;Euryarchaeota;Methanococci;Methanococcales;Methanococcaceae;Methanococcus
SILVA_123_SSURef_tax_silva_full_align_trunc.fasta.gz	Archaea;Euryarchaeota;Methanococci;Methanococcales;Methanococcaceae;Methanococcus
SILVA_128_SSURef_tax_silva.fasta.gz	Archaea;Euryarchaeota;Methanococci;Methanococcales;Methanococcaceae;Methanococcus
SILVA_128_SSURef_tax_silva_full_align_trunc.fasta.gz	Archaea;Euryarchaeota;Methanococci;Methanococcales;Methanococcaceae;Methanococcus
SILVA_132_SSURef_tax_silva.fasta.gz	Archaea;Euryarchaeota;Methanococci;Methanococcales;Methanococcaceae;Methanococcus
SILVA_132_SSURef_tax_silva_full_align_trunc.fasta.gz	Archaea;Euryarchaeota;Methanococci;Methanococcales;Methanococcaceae;Methanococcus
SILVA_132_SSURef_tax_silva_full_align_trunc.fasta.gz
53	TACGTAGGGGGCAAGCGTTACCCGGATTTACTGGGCGTAAAGGGGGCGTAGGCGGCCTGGTGTGTCGGAT_CCGGTTTGCTCCCCTGGCTTTCGGGCCTCAGCGTCGAGGTCGGCCCAGGAGACCGGCTTCCCCACCGGCG
SILVA_123_SSURef_tax_silva.fasta.gz	Bacteria;Thermotogae;Thermotogae;Thermotogales;Thermotogaceae;Thermotoga
SILVA_123_SSURef_tax_silva_full_align_trunc.fasta.gz	Bacteria;Thermotogae;Thermotogae;Thermotogales;Thermotogaceae;Thermotoga
SILVA_128_SSURef_tax_silva.fasta.gz	Bacteria;Thermotogae;Thermotogae;Thermotogales;Thermotogaceae;Thermotoga
SILVA_128_SSURef_tax_silva_full_align_trunc.fasta.gz	Bacteria;Thermotogae;Thermotogae;Thermotogales;Thermotogaceae;Thermotoga
SILVA_132_SSURef_tax_silva.fasta.gz	Bacteria;Thermotogae;Thermotogae;Thermotogales;Thermotogaceae;Thermotoga
SILVA_132_SSURef_tax_silva_full_align_trunc.fasta.gz	Bacteria;Thermotogae;Thermotogae;Thermotogales;Thermotogaceae;Thermotoga
bac_ssu_r86.1_20180911.fna.gz	Bacteria;Thermotogota;Thermotogae;Thermotogales;Thermotogaceae;Thermotoga
54	TACGGAGGGAGCTAGCGTTGTTCGGAATTACTGGGCGTAAAGCGTACGTAGGCGGTTTAATAAGTCAGGG_CCTGTTTGCTACCCACGCTTTCGTACCTCAGCGTCAACTATAGACCAGTAAGTCGCCTTCGCCACTGGTG
SILVA_123_SSURef_tax_silva.fasta.gz	Bacteria;Proteobacteria;Alphaproteobacteria;Sphingomonadales;Sphingomonadaceae;Zymomonas
SILVA_123_SSURef_tax_silva_full_align_trunc.fasta.gz	Bacteria;Proteobacteria;Alphaproteobacteria;Sphingomonadales;Sphingomonadaceae;Zymomonas
SILVA_128_SSURef_tax_silva.fasta.gz	Bacteria;Proteobacteria;Alphaproteobacteria;Sphingomonadales;Sphingomonadaceae;Zymomonas
SILVA_128_SSURef_tax_silva_full_align_trunc.fasta.gz	Bacteria;Proteobacteria;Alphaproteobacteria;Sphingomonadales;Sphingomonadaceae;Zymomonas
SILVA_132_SSURef_tax_silva.fasta.gz	Bacteria;Proteobacteria;Alphaproteobacteria;Sphingomonadales;Sphingomonadaceae;Zymomonas
SILVA_132_SSURef_tax_silva_full_align_trunc.fasta.gz	Bacteria;Proteobacteria;Alphaproteobacteria;Sphingomonadales;Sphingomonadaceae;Zymomonas
bac_ssu_r86.1_20180911.fna.gz	Bacteria;Proteobacteria;Alphaproteobacteria;Sphingomonadales;Sphingomonadaceae;Zymomonas
55	TACAGAGGTCTCAAGCGTTGTTCGGAATCACTGGGCGTAAAGCGTGCGTAGGCTGTTTCGTAAGTCGTGT_CCCTTTCGCTCCCCTGGCCTTCGTGCCTCAGCGTCAATTAATGTCCAGGAACCCGCCTTCGCCACGAGTG
SILVA_123_SSURef_tax_silva.fasta.gz	Bacteria;Verrucomicrobia;Verrucomicrobiae;Verrucomicrobiales;Verrucomicrobiaceae;Akkermansia
SILVA_123_SSURef_tax_silva_full_align_trunc.fasta.gz	Bacteria;Verrucomicrobia;Verrucomicrobiae;Verrucomicrobiales;Verrucomicrobiaceae;Akkermansia
SILVA_128_SSURef_tax_silva.fasta.gz	Bacteria;Verrucomicrobia;Verrucomicrobiae;Verrucomicrobiales;Verrucomicrobiaceae;Akkermansia
SILVA_128_SSURef_tax_silva_full_align_trunc.fasta.gz	Bacteria;Verrucomicrobia;Verrucomicrobiae;Verrucomicrobiales;Verrucomicrobiaceae;Akkermansia
SILVA_132_SSURef_tax_silva.fasta.gz	Bacteria;Verrucomicrobia;Verrucomicrobiae;Verrucomicrobiales;Akkermansiaceae;Akkermansia
SILVA_132_SSURef_tax_silva_full_align_trunc.fasta.gz	Bacteria;Verrucomicrobia;Verrucomicrobiae;Verrucomicrobiales;Akkermansiaceae;Akkermansia
bac_ssu_r86.1_20180911.fna.gz	Bacteria;Verrucomicrobiota
56	TACGTAGGGGGCAAGCGTTACCCGGATTTACTGGGCGTAAAGGGGGCGTAGGCGGCCTGGTGTGTCGGAT_CCGGTTTGCTCCCCTGGCTTTCGGGCCTCAGCGTCGGGGTCGGCCCAGGAGACCGGCTTCCCCACCGGCG
SILVA_123_SSURef_tax_silva.fasta.gz	Bacteria;Thermotogae;Thermotogae;Thermotogales;Thermotogaceae;Thermotoga
SILVA_123_SSURef_tax_silva_full_align_trunc.fasta.gz	Bacteria;Thermotogae;Thermotogae;Thermotogales;Thermotogaceae;Thermotoga
SILVA_128_SSURef_tax_silva.fasta.gz	Bacteria;Thermotogae;Thermotogae;Thermotogales;Thermotogaceae;Thermotoga
SILVA_128_SSURef_tax_silva_full_align_trunc.fasta.gz	Bacteria;Thermotogae;Thermotogae;Thermotogales;Thermotogaceae;Thermotoga
SILVA_132_SSURef_tax_silva.fasta.gz	Bacteria;Thermotogae;Thermotogae;Thermotogales;Thermotogaceae;Thermotoga
SILVA_132_SSURef_tax_silva_full_align_trunc.fasta.gz	Bacteria;Thermotogae;Thermotogae;Thermotogales;Thermotogaceae;Thermotoga
bac_ssu_r86.1_20180911.fna.gz	Bacteria;Thermotogota;Thermotogae;Thermotogales;Thermotogaceae;Thermotoga
57	GACGTAGGGCGCAAGCGTTGTCCGGATTTATTGGGCGTAAAGAGCTCGTAGGCGGCTTGTCGCGTCGACT_CCTGTTCGCTCCCCACGCTTTCGCTCCTCAGCGTCAATATCGGCCCAGAGACCCGCCTTCGCCACCGGTG
SILVA_123_SSURef_tax_silva.fasta.gz	Bacteria;Actinobacteria;Actinobacteria;Micromonosporales;Micromonosporaceae
SILVA_123_SSURef_tax_silva_full_align_trunc.fasta.gz	Bacteria;Actinobacteria;Actinobacteria;Micromonosporales;Micromonosporaceae
SILVA_128_SSURef_tax_silva.fasta.gz	Bacteria;Actinobacteria;Actinobacteria;Micromonosporales;Micromonosporaceae;Salinispora
SILVA_128_SSURef_tax_silva_full_align_trunc.fasta.gz	Bacteria;Actinobacteria;Actinobacteria;Micromonosporales;Micromonosporaceae;Salinispora
SILVA_132_SSURef_tax_silva.fasta.gz	Bacteria;Actinobacteria;Actinobacteria;Micromonosporales;Micromonosporaceae;Salinispora
SILVA_132_SSURef_tax_silva_full_align_trunc.fasta.gz	Bacteria;Actinobacteria;Actinobacteria;Micromonosporales;Micromonosporaceae;Salinispora
bac_ssu_r86.1_20180911.fna.gz	Bacteria;Actinobacteriota;Actinobacteria;Corynebacteriales;Micromonosporaceae;Micromonospora
58	TACGGAGGGTGCAAGCGTTAATCGGAATGACTGGGCGTAAAGCGCACGCAGGCGGTCTGTTAAGTTGGAT_CCTGTTTGCTCCCCACGCTTTCGCACCTGAGCGTCAGTCTTCGTCCAGGGGGCCGCCTTCGCCACCGGTA
SILVA_123_SSURef_tax_silva.fasta.gz	Bacteria;Proteobacteria;Gammaproteobacteria;Enterobacteriales;Enterobacteriaceae
SILVA_123_SSURef_tax_silva_full_align_trunc.fasta.gz	Bacteria;Proteobacteria;Gammaproteobacteria;Enterobacteriales;Enterobacteriaceae
SILVA_128_SSURef_tax_silva.fasta.gz	Bacteria;Proteobacteria;Gammaproteobacteria;Enterobacteriales;Enterobacteriaceae
SILVA_128_SSURef_tax_silva_full_align_trunc.fasta.gz	Bacteria;Proteobacteria;Gammaproteobacteria;Enterobacteriales;Enterobacteriaceae
SILVA_132_SSURef_tax_silva.fasta.gz	Bacteria;Proteobacteria;Gammaproteobacteria;Enterobacteriales;Enterobacteriaceae
SILVA_132_SSURef_tax_silva_full_align_trunc.fasta.gz	Bacteria;Proteobacteria;Gammaproteobacteria;Enterobacteriales;Enterobacteriaceae
bac_ssu_r86.1_20180911.fna.gz	Bacteria;Proteobacteria;Gammaproteobacteria;Enterobacterales;Enterobacteriaceae
59	TACGGAGGGTCCGAGCGTTAATCGGAATTACTGGGCGTAAAGCGTGCGCAGGCGGTTTGTTAAGCGAGAT_CCTGTTTGCTCCCCACGCTTTCGTGCCTGAGCGTCAGTCTTTGTCCAGGGGGCCGCCTTCGCCACCGGTA
SILVA_123_SSURef_tax_silva.fasta.gz	Bacteria;Proteobacteria;Gammaproteobacteria;Alteromonadales;Shewanellaceae;Shewanella
SILVA_123_SSURef_tax_silva_full_align_trunc.fasta.gz	Bacteria;Proteobacteria;Gammaproteobacteria;Alteromonadales;Shewanellaceae;Shewanella
SILVA_128_SSURef_tax_silva.fasta.gz	Bacteria;Proteobacteria;Gammaproteobacteria;Alteromonadales;Shewanellaceae;Shewanella
SILVA_128_SSURef_tax_silva_full_align_trunc.fasta.gz	Bacteria;Proteobacteria;Gammaproteobacteria;Alteromonadales;Shewanellaceae;Shewanella
SILVA_132_SSURef_tax_silva.fasta.gz	Bacteria;Proteobacteria;Gammaproteobacteria;Alteromonadales;Shewanellaceae;Shewanella
SILVA_132_SSURef_tax_silva_full_align_trunc.fasta.gz	Bacteria;Proteobacteria;Gammaproteobacteria;Alteromonadales;Shewanellaceae;Shewanella
bac_ssu_r86.1_20180911.fna.gz	Bacteria;Proteobacteria;Gammaproteobacteria;Enterobacterales;Shewanellaceae;Shewanella
60	TACGTAGGGTGCGAGCGTTAATCGGAATTACTGGGCGTAAAGGGTGCGCAGGCGGTCTTGCAAGTCAGAT_CCTGTTTGCTCCCCACGCTTTCGTGCATGAGCGTCAGTGTCAACCCAGGGAGCTGCCTTCGCCATCGGTG
SILVA_123_SSURef_tax_silva.fasta.gz	Bacteria;Proteobacteria;Betaproteobacteria;Nitrosomonadales;Nitrosomonadaceae;Nitrosomonas
SILVA_123_SSURef_tax_silva_full_align_trunc.fasta.gz	Bacteria;Proteobacteria;Betaproteobacteria;Nitrosomonadales;Nitrosomonadaceae;Nitrosomonas
SILVA_128_SSURef_tax_silva.fasta.gz	Bacteria;Proteobacteria;Betaproteobacteria;Nitrosomonadales;Nitrosomonadaceae;Nitrosomonas
SILVA_128_SSURef_tax_silva_full_align_trunc.fasta.gz	Bacteria;Proteobacteria;Betaproteobacteria;Nitrosomonadales;Nitrosomonadaceae;Nitrosomonas
SILVA_132_SSURef_tax_silva.fasta.gz	Bacteria;Proteobacteria;Gammaproteobacteria;Betaproteobacteriales;Nitrosomonadaceae;Nitrosomonas
SILVA_132_SSURef_tax_silva_full_align_trunc.fasta.gz	Bacteria;Proteobacteria;Gammaproteobacteria;Betaproteobacteriales;Nitrosomonadaceae;Nitrosomonas
bac_ssu_r86.1_20180911.fna.gz	Bacteria;Proteobacteria;Gammaproteobacteria;Betaproteobacteriales;Nitrosomonadaceae;Nitrosomonas
61	TACGTAGGTCCCGAACGTTGCGCGAATTTACTGGGCGTAAAGGGTCCGTAGGCGGTTTAGCAAGTGGTTG_CCGGTTTGCTCCCCTAGCTTTCGTCCCTCAGCGTCAGGACAGTTCCAGTCGGCCGCCTTCGCCACTGGTG
SILVA_123_SSURef_tax_silva.fasta.gz	Bacteria;Aquificae;Aquificae;Aquificales;Hydrogenothermaceae;Sulfurihydrogenibium
SILVA_123_SSURef_tax_silva_full_align_trunc.fasta.gz	Bacteria;Aquificae;Aquificae;Aquificales;Hydrogenothermaceae;Sulfurihydrogenibium
SILVA_128_SSURef_tax_silva.fasta.gz	Bacteria;Aquificae;Aquificae;Aquificales;Hydrogenothermaceae;Sulfurihydrogenibium
SILVA_128_SSURef_tax_silva_full_align_trunc.fasta.gz	Bacteria;Aquificae;Aquificae;Aquificales;Hydrogenothermaceae;Sulfurihydrogenibium
SILVA_132_SSURef_tax_silva.fasta.gz	Bacteria;Aquificae;Aquificae;Hydrogenothermales;Hydrogenothermaceae;Sulfurihydrogenibium
SILVA_132_SSURef_tax_silva_full_align_trunc.fasta.gz	Bacteria;Aquificae;Aquificae;Hydrogenothermales;Hydrogenothermaceae;Sulfurihydrogenibium
bac_ssu_r86.1_20180911.fna.gz	Bacteria;Aquificota;Aquificae;Hydrogenothermales;Hydrogenothermaceae;Sulfurihydrogenibium
62	TACGTAGGGTGCAAGCGTTAATCGGAATTACTGGGCGTAAAGCGTGCGCAGGCGGTTGTGTAAGACAGAT_CCTGTTTGCTCCCCACGCTTTCGTGCATGAGCGTCAGTACAGGTCCAGGGGATTGCCTTCGCCATCGGTG
SILVA_123_SSURef_tax_silva.fasta.gz	Bacteria;Proteobacteria;Betaproteobacteria;Burkholderiales;Comamonadaceae
SILVA_123_SSURef_tax_silva_full_align_trunc.fasta.gz	Bacteria;Proteobacteria;Betaproteobacteria;Burkholderiales;Comamonadaceae
SILVA_128_SSURef_tax_silva.fasta.gz	Bacteria;Proteobacteria;Betaproteobacteria;Burkholderiales;Comamonadaceae
SILVA_128_SSURef_tax_silva_full_align_trunc.fasta.gz	Bacteria;Proteobacteria;Betaproteobacteria;Burkholderiales;Comamonadaceae
SILVA_132_SSURef_tax_silva.fasta.gz	Bacteria;Proteobacteria;Gammaproteobacteria;Betaproteobacteriales;Burkholderiaceae
SILVA_132_SSURef_tax_silva_full_align_trunc.fasta.gz	Bacteria;Proteobacteria;Gammaproteobacteria;Betaproteobacteriales;Burkholderiaceae
bac_ssu_r86.1_20180911.fna.gz	Bacteria;Proteobacteria;Gammaproteobacteria;Betaproteobacteriales;Burkholderiaceae;Leptothrix
63	TACGGAGGATGCGAGCGTTATCCGGATTTATTGGGTTTAAAGGGTGCGTAGGTTGTTCGGTAAGTCAGCG_CCTGTTTGATACCCACGCCTTCGTGCTTCAGTGTCAATCGCAGTATGGCAAGCTGCCTTCGCAATCGGAG
SILVA_123_SSURef_tax_silva.fasta.gz	Bacteria;Bacteroidetes;Bacteroidia;Bacteroidales;Porphyromonadaceae;Porphyromonas
SILVA_123_SSURef_tax_silva_full_align_trunc.fasta.gz	Bacteria;Bacteroidetes;Bacteroidia;Bacteroidales;Porphyromonadaceae;Porphyromonas
SILVA_128_SSURef_tax_silva.fasta.gz	Bacteria;Bacteroidetes;Bacteroidia;Bacteroidales;Porphyromonadaceae;Porphyromonas
SILVA_128_SSURef_tax_silva_full_align_trunc.fasta.gz	Bacteria;Bacteroidetes;Bacteroidia;Bacteroidales;Porphyromonadaceae;Porphyromonas
SILVA_132_SSURef_tax_silva.fasta.gz	Bacteria;Bacteroidetes;Bacteroidia;Bacteroidales;Porphyromonadaceae;Porphyromonas
SILVA_132_SSURef_tax_silva_full_align_trunc.fasta.gz	Bacteria;Bacteroidetes;Bacteroidia;Bacteroidales;Porphyromonadaceae;Porphyromonas
bac_ssu_r86.1_20180911.fna.gz	Bacteria;Bacteroidota;Bacteroidia;Bacteroidales;Porphyromonadaceae;Porphyromonas
64	TACGGAGGATGCGAGCGTTATCCGGATTTATTGGGTTTAAAGGGTGCGTAGGTTGTTCGGTAAGTCAGCG_CCTGTTTGATACCCACGCCTTCGTGCTTCAGTGTCAGTCGCAGTATGGCAAGCTGCCTTCGCAATCGGAG
SILVA_123_SSURef_tax_silva.fasta.gz	Bacteria;Bacteroidetes;Bacteroidia;Bacteroidales;Porphyromonadaceae;Porphyromonas
SILVA_123_SSURef_tax_silva_full_align_trunc.fasta.gz	Bacteria;Bacteroidetes;Bacteroidia;Bacteroidales;Porphyromonadaceae;Porphyromonas
SILVA_128_SSURef_tax_silva.fasta.gz	Bacteria;Bacteroidetes;Bacteroidia;Bacteroidales;Porphyromonadaceae;Porphyromonas
SILVA_128_SSURef_tax_silva_full_align_trunc.fasta.gz	Bacteria;Bacteroidetes;Bacteroidia;Bacteroidales;Porphyromonadaceae;Porphyromonas
SILVA_132_SSURef_tax_silva.fasta.gz	Bacteria;Bacteroidetes;Bacteroidia;Bacteroidales;Porphyromonadaceae;Porphyromonas
SILVA_132_SSURef_tax_silva_full_align_trunc.fasta.gz	Bacteria;Bacteroidetes;Bacteroidia;Bacteroidales;Porphyromonadaceae;Porphyromonas
bac_ssu_r86.1_20180911.fna.gz	Bacteria;Bacteroidota;Bacteroidia;Bacteroidales;Porphyromonadaceae;Porphyromonas
65	TACCGGCGGCCCGAGTGGCGGCCACTTTTATTGGGCCTAAAGCGTCCGTAGCCGGGCTGGTAAGTCCTCC_CCGGTTCGCTCCCCTGGCCTTCGTCCCTCACCGTCGGACCCGTTCCAGCCGGGCGCCTTCGCCACAGGTG
SILVA_123_SSURef_tax_silva.fasta.gz	Archaea;Euryarchaeota;Archaeoglobi;Archaeoglobales;Archaeoglobaceae;Archaeoglobus
SILVA_123_SSURef_tax_silva_full_align_trunc.fasta.gz	Archaea;Euryarchaeota;Archaeoglobi;Archaeoglobales;Archaeoglobaceae;Archaeoglobus
SILVA_128_SSURef_tax_silva.fasta.gz	Archaea;Euryarchaeota;Archaeoglobi;Archaeoglobales;Archaeoglobaceae;Archaeoglobus
SILVA_128_SSURef_tax_silva_full_align_trunc.fasta.gz	Archaea;Euryarchaeota;Archaeoglobi;Archaeoglobales;Archaeoglobaceae;Archaeoglobus
SILVA_132_SSURef_tax_silva.fasta.gz	Archaea;Euryarchaeota;Archaeoglobi;Archaeoglobales;Archaeoglobaceae;Archaeoglobus
SILVA_132_SSURef_tax_silva_full_align_trunc.fasta.gz	Archaea;Euryarchaeota;Archaeoglobi;Archaeoglobales;Archaeoglobaceae;Archaeoglobus
SILVA_132_SSURef_tax_silva_full_align_trunc.fasta.gz

## Sheet: mock18
1	TACGGAGGGTGCGAGCGTTAATCGGAATCACTGGGCGTAAAGCGCACGTAGGCTGCTTGGTAAGTCAGGG_CCTGTTTGCTCCCCACGCTTTCGCACCTCAGCGTCAGTACCGGTCCAGGTAGTCGCCTTCGCCACTGATG
SILVA_123_SSURef_tax_silva.fasta.gz	Bacteria;Proteobacteria;Deltaproteobacteria;Desulfovibrionales;Desulfovibrionaceae;Desulfovibrio
SILVA_123_SSURef_tax_silva_full_align_trunc.fasta.gz	Bacteria;Proteobacteria;Deltaproteobacteria;Desulfovibrionales;Desulfovibrionaceae;Desulfovibrio
SILVA_128_SSURef_tax_silva.fasta.gz	Bacteria;Proteobacteria;Deltaproteobacteria;Desulfovibrionales;Desulfovibrionaceae;Desulfovibrio
SILVA_128_SSURef_tax_silva_full_align_trunc.fasta.gz	Bacteria;Proteobacteria;Deltaproteobacteria;Desulfovibrionales;Desulfovibrionaceae;Desulfovibrio
SILVA_132_SSURef_tax_silva.fasta.gz	Bacteria;Proteobacteria;Deltaproteobacteria;Desulfovibrionales;Desulfovibrionaceae;Desulfovibrio
SILVA_132_SSURef_tax_silva_full_align_trunc.fasta.gz	Bacteria;Proteobacteria;Deltaproteobacteria;Desulfovibrionales;Desulfovibrionaceae;Desulfovibrio
bac_ssu_r86.1_20180911.fna.gz	Bacteria;Desulfobacterota;Desulfovibrionia;Desulfovibrionales;Desulfovibrionaceae;Desulfovibrio_A
2	TACGGAGGGTGCAAGCGTTAATCGGAATTACTGGGCGTAAAGCGCACGCAGGCGGTTTGTTAAGTCAGAT_CCTGTTTGCTCCCCACGCTTTCGCACCTGAGCGTCAGTCTTCGTCCAGGGGGCCGCCTTCGCCACCGGTA
SILVA_123_SSURef_tax_silva.fasta.gz	Bacteria;Proteobacteria;Gammaproteobacteria;Enterobacteriales;Enterobacteriaceae
SILVA_123_SSURef_tax_silva_full_align_trunc.fasta.gz	Bacteria;Proteobacteria;Gammaproteobacteria;Enterobacteriales;Enterobacteriaceae
SILVA_128_SSURef_tax_silva.fasta.gz	Bacteria;Proteobacteria;Gammaproteobacteria;Enterobacteriales;Enterobacteriaceae
SILVA_128_SSURef_tax_silva_full_align_trunc.fasta.gz	Bacteria;Proteobacteria;Gammaproteobacteria;Enterobacteriales;Enterobacteriaceae
SILVA_132_SSURef_tax_silva.fasta.gz	Bacteria;Proteobacteria;Gammaproteobacteria;Enterobacteriales;Enterobacteriaceae
SILVA_132_SSURef_tax_silva_full_align_trunc.fasta.gz	Bacteria;Proteobacteria;Gammaproteobacteria;Enterobacteriales;Enterobacteriaceae
bac_ssu_r86.1_20180911.fna.gz	Bacteria;Proteobacteria;Gammaproteobacteria;Enterobacterales;Enterobacteriaceae
3	CACGTAAGTTGCGAGCGTTGTTCGGAATTATTGGGCGTAAAGGGCATGTAGGCGGTTCTGCAAGTCTGGT_CCTGTTTGCTCCCCGCACCTTCGCACCTCAGCGTCAGTCATCTGCTGGCAGCCTGCCTTCGCCATTGGTA
SILVA_123_SSURef_tax_silva.fasta.gz	Bacteria;Spirochaetae;Spirochaetes;Spirochaetales;Spirochaetaceae;Treponema_2
SILVA_123_SSURef_tax_silva_full_align_trunc.fasta.gz	Bacteria;Spirochaetae;Spirochaetes;Spirochaetales;Spirochaetaceae;Treponema_2
SILVA_128_SSURef_tax_silva.fasta.gz	Bacteria;Spirochaetae;Spirochaetes;Spirochaetales;Spirochaetaceae;Treponema_2
SILVA_128_SSURef_tax_silva_full_align_trunc.fasta.gz	Bacteria;Spirochaetae;Spirochaetes;Spirochaetales;Spirochaetaceae;Treponema_2
SILVA_132_SSURef_tax_silva.fasta.gz	Bacteria;Spirochaetes;Spirochaetia;Spirochaetales;Spirochaetaceae;Treponema_2
SILVA_132_SSURef_tax_silva_full_align_trunc.fasta.gz	Bacteria;Spirochaetes;Spirochaetia;Spirochaetales;Spirochaetaceae;Treponema_2
bac_ssu_r86.1_20180911.fna.gz	Bacteria;Spirochaetota;Spirochaetia;Treponematales;Treponemataceae;Treponema_D
4	GACGTAGGAGACGAGCGTTATCCGGCTTTACTGGGCGTAAAGCGCGTGCAGGCGGCTCGTTAAGTTGGAT_CCCGTTCGCTCCCCTAGCTTTCGCGTCTGAGCGTCAGTTGCAGCCCAGAGAGCCGCCTTCGCCTCTGGTG
SILVA_123_SSURef_tax_silva.fasta.gz	Bacteria;Chloroflexi;Anaerolineae;Anaerolineales;Anaerolineaceae;Anaerolinea
SILVA_123_SSURef_tax_silva_full_align_trunc.fasta.gz	Bacteria;Chloroflexi;Anaerolineae;Anaerolineales;Anaerolineaceae;Anaerolinea
SILVA_128_SSURef_tax_silva.fasta.gz	Bacteria;Chloroflexi;Anaerolineae;Anaerolineales;Anaerolineaceae;Anaerolinea
SILVA_128_SSURef_tax_silva_full_align_trunc.fasta.gz	Bacteria;Chloroflexi;Anaerolineae;Anaerolineales;Anaerolineaceae;Anaerolinea
SILVA_132_SSURef_tax_silva.fasta.gz	Bacteria;Chloroflexi;Anaerolineae;Anaerolineales;Anaerolineaceae;Anaerolinea
SILVA_132_SSURef_tax_silva_full_align_trunc.fasta.gz	Bacteria;Chloroflexi;Anaerolineae;Anaerolineales;Anaerolineaceae;Anaerolinea
bac_ssu_r86.1_20180911.fna.gz	Bacteria;Chloroflexota;Anaerolineae;Anaerolineales;Anaerolineaceae;Anaerolinea
5	TACGGAGGGTGCGAGCGTTGCCCGGAATCACTGGGCGTAAAGGGCGCGTAGGCGGTCTGCTAAGCGTGTG_CCTGTTTGCTCCCCACGCTATCGCGCCTCAGCGTCAGCTACTGCCCAGCAGGCCGCCTTCGCCACTGGTG
SILVA_123_SSURef_tax_silva.fasta.gz	Bacteria;Gemmatimonadetes;Gemmatimonadetes;Gemmatimonadales;Gemmatimonadaceae;Gemmatimonas
SILVA_123_SSURef_tax_silva_full_align_trunc.fasta.gz	Bacteria;Gemmatimonadetes;Gemmatimonadetes;Gemmatimonadales;Gemmatimonadaceae;Gemmatimonas
SILVA_128_SSURef_tax_silva.fasta.gz	Bacteria;Gemmatimonadetes;Gemmatimonadetes;Gemmatimonadales;Gemmatimonadaceae;Gemmatimonas
SILVA_128_SSURef_tax_silva_full_align_trunc.fasta.gz	Bacteria;Gemmatimonadetes;Gemmatimonadetes;Gemmatimonadales;Gemmatimonadaceae;Gemmatimonas
SILVA_132_SSURef_tax_silva.fasta.gz	Bacteria;Gemmatimonadetes;Gemmatimonadetes;Gemmatimonadales;Gemmatimonadaceae;Gemmatimonas
SILVA_132_SSURef_tax_silva_full_align_trunc.fasta.gz	Bacteria;Gemmatimonadetes;Gemmatimonadetes;Gemmatimonadales;Gemmatimonadaceae;Gemmatimonas
bac_ssu_r86.1_20180911.fna.gz	Bacteria;Gemmatimonadota;Gemmatimonadetes;Gemmatimonadales;Gemmatimonadaceae;Gemmatimonas
6	TACGAAGGGGGCTAGCGTTGCTCGGAATTACTGGGCGTAAAGGGTGCGTAGGCGGGTCTTTAAGTCAGGG_CCTGTTTGCTCCCCACGCTTTCGTGCCTCAGCGTCAGTATCGGGCCAGTGAGCCGCCTTCGCCACTGGTG
SILVA_123_SSURef_tax_silva.fasta.gz	Bacteria;Proteobacteria;Alphaproteobacteria;Rhizobiales;Bradyrhizobiaceae;Bradyrhizobium
SILVA_123_SSURef_tax_silva_full_align_trunc.fasta.gz	Bacteria;Proteobacteria;Alphaproteobacteria;Rhizobiales;Bradyrhizobiaceae;Bradyrhizobium
SILVA_128_SSURef_tax_silva.fasta.gz	Bacteria;Proteobacteria;Alphaproteobacteria;Rhizobiales;Bradyrhizobiaceae;Bradyrhizobium
SILVA_128_SSURef_tax_silva_full_align_trunc.fasta.gz	Bacteria;Proteobacteria;Alphaproteobacteria;Rhizobiales;Bradyrhizobiaceae;Bradyrhizobium
SILVA_132_SSURef_tax_silva.fasta.gz	Bacteria;Proteobacteria;Alphaproteobacteria;Rhizobiales;Xanthobacteraceae;Bradyrhizobium
SILVA_132_SSURef_tax_silva_full_align_trunc.fasta.gz	Bacteria;Proteobacteria;Alphaproteobacteria;Rhizobiales;Xanthobacteraceae;Bradyrhizobium
bac_ssu_r86.1_20180911.fna.gz	Bacteria;Proteobacteria;Alphaproteobacteria;Rhizobiales;Xanthobacteraceae;Bradyrhizobium
7	TACGGAGGGTGCAAGCGTTACCCGGAATCACTGGGCGTAAAGGGCGCGTAGGCGGACACTTAAGTCTGGT_CCGGTTCGCTCCCCACACTTTCGCGCCTCAGCGTCACCTTCTGTCCAAGAACCTGCCTTCGCCACTGGTG
SILVA_123_SSURef_tax_silva.fasta.gz	Bacteria;Deinococcus-Thermus;Deinococci;Deinococcales;Deinococcaceae;Deinococcus
SILVA_123_SSURef_tax_silva_full_align_trunc.fasta.gz	Bacteria;Deinococcus-Thermus;Deinococci;Deinococcales;Deinococcaceae;Deinococcus
SILVA_128_SSURef_tax_silva.fasta.gz	Bacteria;Deinococcus-Thermus;Deinococci;Deinococcales;Deinococcaceae;Deinococcus
SILVA_128_SSURef_tax_silva_full_align_trunc.fasta.gz	Bacteria;Deinococcus-Thermus;Deinococci;Deinococcales;Deinococcaceae;Deinococcus
SILVA_132_SSURef_tax_silva.fasta.gz	Bacteria;Deinococcus-Thermus;Deinococci;Deinococcales;Deinococcaceae;Deinococcus
SILVA_132_SSURef_tax_silva_full_align_trunc.fasta.gz	Bacteria;Deinococcus-Thermus;Deinococci;Deinococcales;Deinococcaceae;Deinococcus
bac_ssu_r86.1_20180911.fna.gz	Bacteria;Deinococcota;Deinococci;Deinococcales;Deinococcaceae;Deinococcus
8	TACGTAGGGGGCAAGCGTTGTCCGGAATCATTGGGCGTAAAGGGCGCGTAGGCGGATACTTAAGTCTGGT_CCTGTTTGCTCCCCACGCTTTCGCGCCTCAGCGTCAGTTACAGTCCAGAAAGTCGCCTTCGCCACTGGTG
SILVA_123_SSURef_tax_silva.fasta.gz	Bacteria;Firmicutes;Clostridia;Clostridiales;Peptococcaceae;Desulfitobacterium
SILVA_123_SSURef_tax_silva_full_align_trunc.fasta.gz	Bacteria;Firmicutes;Clostridia;Clostridiales;Peptococcaceae;Desulfitobacterium
SILVA_128_SSURef_tax_silva.fasta.gz	Bacteria;Firmicutes;Clostridia;Clostridiales;Peptococcaceae;Desulfitobacterium
SILVA_128_SSURef_tax_silva_full_align_trunc.fasta.gz	Bacteria;Firmicutes;Clostridia;Clostridiales;Peptococcaceae;Desulfitobacterium
SILVA_132_SSURef_tax_silva.fasta.gz	Bacteria;Firmicutes;Clostridia;Clostridiales;Peptococcaceae;Desulfitobacterium
SILVA_132_SSURef_tax_silva_full_align_trunc.fasta.gz	Bacteria;Firmicutes;Clostridia;Clostridiales;Peptococcaceae;Desulfitobacterium
bac_ssu_r86.1_20180911.fna.gz	Bacteria;Firmicutes_B;Desulfitobacteriia;Desulfitobacteriales;Desulfitobacteriaceae;Desulfitobacterium
9	CACGTAAGTTGCGAGCGTTGTTCGGCATTATTGGGCGTAAAGGGCATGTAGGCGGTTCTGCAAGTCTGGT_CCTGTTTGCTCCCCGCACCTTCGCACCTCAGCGTCAGTCATCTGCTGGCAGCCTGCCTTCGCCATTGGTA
SILVA_123_SSURef_tax_silva.fasta.gz	Bacteria;Spirochaetae;Spirochaetes;Spirochaetales;Spirochaetaceae;Treponema_2
SILVA_123_SSURef_tax_silva_full_align_trunc.fasta.gz	Bacteria;Spirochaetae;Spirochaetes;Spirochaetales;Spirochaetaceae;Treponema_2
SILVA_128_SSURef_tax_silva.fasta.gz	Bacteria;Spirochaetae;Spirochaetes;Spirochaetales;Spirochaetaceae;Treponema_2
SILVA_128_SSURef_tax_silva_full_align_trunc.fasta.gz	Bacteria;Spirochaetae;Spirochaetes;Spirochaetales;Spirochaetaceae;Treponema_2
SILVA_132_SSURef_tax_silva.fasta.gz	Bacteria;Spirochaetes;Spirochaetia;Spirochaetales;Spirochaetaceae;Treponema_2
SILVA_132_SSURef_tax_silva_full_align_trunc.fasta.gz	Bacteria;Spirochaetes;Spirochaetia;Spirochaetales;Spirochaetaceae;Treponema_2
bac_ssu_r86.1_20180911.fna.gz	Bacteria;Spirochaetota;Spirochaetia;Treponematales;Treponemataceae;Treponema_D
10	GACAGAGGGGGCAAGCGTTGTCCGGAGTTACTGGGCGTAAAGGGCGCGCAGGCGGTGGGCTGCGTCGGCG_CCGGTTTGCTCCCCACGCTGTCGCGCCGCAGCGTCAGGTCAAGCCCAGGTGGCCGGCTTCCCCACCGGCG
SILVA_123_SSURef_tax_silva.fasta.gz	Bacteria;Chloroflexi;Chloroflexia;Chloroflexales;Chloroflexaceae;Chloroflexus
SILVA_123_SSURef_tax_silva_full_align_trunc.fasta.gz	Bacteria;Chloroflexi;Chloroflexia;Chloroflexales;Chloroflexaceae;Chloroflexus
SILVA_128_SSURef_tax_silva.fasta.gz	Bacteria;Chloroflexi;Chloroflexia;Chloroflexales;Chloroflexaceae;Chloroflexus
SILVA_128_SSURef_tax_silva_full_align_trunc.fasta.gz	Bacteria;Chloroflexi;Chloroflexia;Chloroflexales;Chloroflexaceae;Chloroflexus
SILVA_132_SSURef_tax_silva.fasta.gz	Bacteria;Chloroflexi;Chloroflexia;Chloroflexales;Chloroflexaceae;Chloroflexus
SILVA_132_SSURef_tax_silva_full_align_trunc.fasta.gz	Bacteria;Chloroflexi;Chloroflexia;Chloroflexales;Chloroflexaceae;Chloroflexus
bac_ssu_r86.1_20180911.fna.gz	Bacteria;Chloroflexota;Chloroflexia;Chloroflexales;Chloroflexaceae;Chloroflexus
11	GACGTAGGTGACGAGCGTTATCCGGATTTACTGGGCGTAAAGCGCGTGCAGGCGGCTCGTTAAGTTGGAT_CCCGTTCGCTCCCCTAGCTTTCGCGTCTGAGCGTCAGTTGCAGCCCAGAGAGCCGCCTTCGCCTCTGGTG
SILVA_123_SSURef_tax_silva.fasta.gz	Bacteria;Chloroflexi;Anaerolineae;Anaerolineales;Anaerolineaceae;Anaerolinea
SILVA_123_SSURef_tax_silva_full_align_trunc.fasta.gz	Bacteria;Chloroflexi;Anaerolineae;Anaerolineales;Anaerolineaceae;Anaerolinea
SILVA_128_SSURef_tax_silva.fasta.gz	Bacteria;Chloroflexi;Anaerolineae;Anaerolineales;Anaerolineaceae;Anaerolinea
SILVA_128_SSURef_tax_silva_full_align_trunc.fasta.gz	Bacteria;Chloroflexi;Anaerolineae;Anaerolineales;Anaerolineaceae;Anaerolinea
SILVA_132_SSURef_tax_silva.fasta.gz	Bacteria;Chloroflexi;Anaerolineae;Anaerolineales;Anaerolineaceae;Anaerolinea
SILVA_132_SSURef_tax_silva_full_align_trunc.fasta.gz	Bacteria;Chloroflexi;Anaerolineae;Anaerolineales;Anaerolineaceae;Anaerolinea
bac_ssu_r86.1_20180911.fna.gz	Bacteria;Chloroflexota;Anaerolineae;Anaerolineales;Anaerolineaceae;Anaerolinea
12	TACGTAGGTGGCAAGCGTTGTCCGGAATTATTGGGCGTAAAGGGCTCGCAGGCGGTTTCTTAAGTCTGAT_CCTGTTCGCTCCCCACGCTTTCGCTCCTCAGCGTCAGTTACAGACCAGAGAGTCGCCTTCGCCACTGGTG
SILVA_123_SSURef_tax_silva.fasta.gz	Bacteria;Firmicutes;Bacilli;Bacillales;Bacillaceae;Bacillus
SILVA_123_SSURef_tax_silva_full_align_trunc.fasta.gz	Bacteria;Firmicutes;Bacilli;Bacillales;Bacillaceae;Bacillus
SILVA_128_SSURef_tax_silva.fasta.gz	Bacteria;Firmicutes;Bacilli;Bacillales;Bacillaceae;Bacillus
SILVA_128_SSURef_tax_silva_full_align_trunc.fasta.gz	Bacteria;Firmicutes;Bacilli;Bacillales;Bacillaceae;Bacillus
SILVA_132_SSURef_tax_silva.fasta.gz	Bacteria;Firmicutes;Bacilli;Bacillales;Bacillaceae;Bacillus
SILVA_132_SSURef_tax_silva_full_align_trunc.fasta.gz	Bacteria;Firmicutes;Bacilli;Bacillales;Bacillaceae;Bacillus
bac_ssu_r86.1_20180911.fna.gz	Bacteria;Firmicutes;Bacilli;Bacillales;Bacillaceae;Bacillus
13	GACAGAGGGTGCAAGCGTTGTCCGGAGTTACTGGGCGTAAAGGGCGCGCAGGCGGTGGGCTGCGTCGGCG_CCGGTTTGCTCCCCACGCTGTCGCGCCGCAGCGTCAGGTCAAGCCCAGGTGGCCGGCTTCCCCACCGGCG
SILVA_123_SSURef_tax_silva.fasta.gz	Bacteria;Chloroflexi;Chloroflexia;Chloroflexales;Chloroflexaceae;Chloroflexus
SILVA_123_SSURef_tax_silva_full_align_trunc.fasta.gz	Bacteria;Chloroflexi;Chloroflexia;Chloroflexales;Chloroflexaceae;Chloroflexus
SILVA_128_SSURef_tax_silva.fasta.gz	Bacteria;Chloroflexi;Chloroflexia;Chloroflexales;Chloroflexaceae;Chloroflexus
SILVA_128_SSURef_tax_silva_full_align_trunc.fasta.gz	Bacteria;Chloroflexi;Chloroflexia;Chloroflexales;Chloroflexaceae;Chloroflexus
SILVA_132_SSURef_tax_silva.fasta.gz	Bacteria;Chloroflexi;Chloroflexia;Chloroflexales;Chloroflexaceae;Chloroflexus
SILVA_132_SSURef_tax_silva_full_align_trunc.fasta.gz	Bacteria;Chloroflexi;Chloroflexia;Chloroflexales;Chloroflexaceae;Chloroflexus
bac_ssu_r86.1_20180911.fna.gz	Bacteria;Chloroflexota;Chloroflexia;Chloroflexales;Chloroflexaceae;Chloroflexus
14	GACGTAGGAGACGAGCGTTATCCGGATTTACTGGGCGTAAAGCGCGTGCAGGCGGCTCGTTAAGTTGGAT_CCCGTTCGCTCCCCTAGCTTTCGCGTCTGAGCGTCAGTTGCAGCCCAGAGAGCCGCCTTCGCCTCTGGTG
SILVA_123_SSURef_tax_silva.fasta.gz	Bacteria;Chloroflexi;Anaerolineae;Anaerolineales;Anaerolineaceae;Anaerolinea
SILVA_123_SSURef_tax_silva_full_align_trunc.fasta.gz	Bacteria;Chloroflexi;Anaerolineae;Anaerolineales;Anaerolineaceae;Anaerolinea
SILVA_128_SSURef_tax_silva.fasta.gz	Bacteria;Chloroflexi;Anaerolineae;Anaerolineales;Anaerolineaceae;Anaerolinea
SILVA_128_SSURef_tax_silva_full_align_trunc.fasta.gz	Bacteria;Chloroflexi;Anaerolineae;Anaerolineales;Anaerolineaceae;Anaerolinea
SILVA_132_SSURef_tax_silva.fasta.gz	Bacteria;Chloroflexi;Anaerolineae;Anaerolineales;Anaerolineaceae;Anaerolinea
SILVA_132_SSURef_tax_silva_full_align_trunc.fasta.gz	Bacteria;Chloroflexi;Anaerolineae;Anaerolineales;Anaerolineaceae;Anaerolinea
bac_ssu_r86.1_20180911.fna.gz	Bacteria;Chloroflexota;Anaerolineae;Anaerolineales;Anaerolineaceae;Anaerolinea
15	GACCGAGGGGGCAAGCGTTGTCCGGAGTTACTGGGCGTAAAGGGCGCGCAGGCGGTGGGCTGCGTCGGCG_CCGGTTTGCTCCCCACGCTGTCGCGCCGCAGCGTCAGGTCAAGCCCAGGTGGCCGGCTTCCCCACCGGCG
SILVA_123_SSURef_tax_silva.fasta.gz	Bacteria;Chloroflexi;Chloroflexia;Chloroflexales;Chloroflexaceae;Chloroflexus
SILVA_123_SSURef_tax_silva_full_align_trunc.fasta.gz	Bacteria;Chloroflexi;Chloroflexia;Chloroflexales;Chloroflexaceae;Chloroflexus
SILVA_128_SSURef_tax_silva.fasta.gz	Bacteria;Chloroflexi;Chloroflexia;Chloroflexales;Chloroflexaceae;Chloroflexus
SILVA_128_SSURef_tax_silva_full_align_trunc.fasta.gz	Bacteria;Chloroflexi;Chloroflexia;Chloroflexales;Chloroflexaceae;Chloroflexus
SILVA_132_SSURef_tax_silva.fasta.gz	Bacteria;Chloroflexi;Chloroflexia;Chloroflexales;Chloroflexaceae;Chloroflexus
SILVA_132_SSURef_tax_silva_full_align_trunc.fasta.gz	Bacteria;Chloroflexi;Chloroflexia;Chloroflexales;Chloroflexaceae;Chloroflexus
bac_ssu_r86.1_20180911.fna.gz	Bacteria;Chloroflexota;Chloroflexia;Chloroflexales;Chloroflexaceae;Chloroflexus
16	TACGTAGGTGGCAAGCGTTGTCCGGATTTACTGGGCGTAAAGGATGTGTAGGCGGATATTTAAGTGAGAT_CCTGTTTGCTCCCCACGCTTTCATGCCTCAGCGTCAGTTACAGTCCAGAAGGCCGCCTTCGCCACTGGTA
SILVA_123_SSURef_tax_silva.fasta.gz	Bacteria;Firmicutes;Clostridia;Clostridiales;Clostridiaceae_1;Clostridium_sensu_stricto_11
SILVA_123_SSURef_tax_silva_full_align_trunc.fasta.gz	Bacteria;Firmicutes;Clostridia;Clostridiales;Clostridiaceae_1;Clostridium_sensu_stricto_11
SILVA_128_SSURef_tax_silva.fasta.gz	Bacteria;Firmicutes;Clostridia;Clostridiales;Clostridiaceae_1;Clostridium_sensu_stricto_11
SILVA_128_SSURef_tax_silva_full_align_trunc.fasta.gz	Bacteria;Firmicutes;Clostridia;Clostridiales;Clostridiaceae_1;Clostridium_sensu_stricto_11
SILVA_132_SSURef_tax_silva.fasta.gz	Bacteria;Firmicutes;Clostridia;Clostridiales;Clostridiaceae_1;Clostridium_sensu_stricto_11
SILVA_132_SSURef_tax_silva_full_align_trunc.fasta.gz	Bacteria;Firmicutes;Clostridia;Clostridiales;Clostridiaceae_1;Clostridium_sensu_stricto_11
bac_ssu_r86.1_20180911.fna.gz	Bacteria;Firmicutes_A;Clostridia;Clostridiales;Clostridiaceae;Clostridium_S
17	TACGGAGGATCCGAGCGTTATCCGGATTTATTGGGTTTAAAGGGAGCGTAGATGGATATTTAAGTCAGTT_CCTGTTTGATACCCACACTTTCGAGCCTCAATGTCAGTTGCAGCTTAGCAGGCTGCCTTCGCAATCGGAG
SILVA_123_SSURef_tax_silva.fasta.gz	Bacteria;Bacteroidetes;Bacteroidia;Bacteroidales;Bacteroidaceae;Bacteroides
SILVA_123_SSURef_tax_silva_full_align_trunc.fasta.gz	Bacteria;Bacteroidetes;Bacteroidia;Bacteroidales;Bacteroidaceae;Bacteroides
SILVA_128_SSURef_tax_silva.fasta.gz	Bacteria;Bacteroidetes;Bacteroidia;Bacteroidales;Bacteroidaceae;Bacteroides
SILVA_128_SSURef_tax_silva_full_align_trunc.fasta.gz	Bacteria;Bacteroidetes;Bacteroidia;Bacteroidales;Bacteroidaceae;Bacteroides
SILVA_132_SSURef_tax_silva.fasta.gz	Bacteria;Bacteroidetes;Bacteroidia;Bacteroidales;Bacteroidaceae;Bacteroides
SILVA_132_SSURef_tax_silva_full_align_trunc.fasta.gz	Bacteria;Bacteroidetes;Bacteroidia;Bacteroidales;Bacteroidaceae;Bacteroides
bac_ssu_r86.1_20180911.fna.gz	Bacteria;Bacteroidota
18	TACCGAGGGTGCAAGCGTTAATCGGAATTACTGGGCGTAAAGCGCGCGTAGGTGGTTTGTTAAGTTGGAT_CCTGTTTGCTCCCCACGCTTTCGCACCTCAGTGTCAGTATCAGTCCAGGTGGTCGCCTTCGCCACTGGTG
SILVA_123_SSURef_tax_silva.fasta.gz	Bacteria;Proteobacteria;Gammaproteobacteria;Pseudomonadales;Pseudomonadaceae;Pseudomonas
SILVA_123_SSURef_tax_silva_full_align_trunc.fasta.gz	Bacteria;Proteobacteria;Gammaproteobacteria;Pseudomonadales;Pseudomonadaceae;Pseudomonas
SILVA_128_SSURef_tax_silva.fasta.gz	Bacteria;Proteobacteria;Gammaproteobacteria;Pseudomonadales;Pseudomonadaceae;Pseudomonas
SILVA_128_SSURef_tax_silva_full_align_trunc.fasta.gz	Bacteria;Proteobacteria;Gammaproteobacteria;Pseudomonadales;Pseudomonadaceae;Pseudomonas
SILVA_132_SSURef_tax_silva.fasta.gz	Bacteria;Proteobacteria;Gammaproteobacteria;Pseudomonadales;Pseudomonadaceae;Pseudomonas
SILVA_132_SSURef_tax_silva_full_align_trunc.fasta.gz	Bacteria;Proteobacteria;Gammaproteobacteria;Pseudomonadales;Pseudomonadaceae;Pseudomonas
bac_ssu_r86.1_20180911.fna.gz	Bacteria;Proteobacteria;Gammaproteobacteria;Pseudomonadales;Pseudomonadaceae;Pseudomonas_E
19	GACGTAGGATACGAGCGTTATCCGGATTTACTGGGCGTAAAGCGCGTGCAGGCGGCTCGTTAAGTTGGAT_CCCGTTCGCTCCCCTAGCTTTCGCGTCTGAGCGTCAGTTGCAGCCCAGAGAGCCGCCTTCGCCTCTGGTG
SILVA_123_SSURef_tax_silva.fasta.gz	Bacteria;Chloroflexi;Anaerolineae;Anaerolineales;Anaerolineaceae;Anaerolinea
SILVA_123_SSURef_tax_silva_full_align_trunc.fasta.gz	Bacteria;Chloroflexi;Anaerolineae;Anaerolineales;Anaerolineaceae;Anaerolinea
SILVA_128_SSURef_tax_silva.fasta.gz	Bacteria;Chloroflexi;Anaerolineae;Anaerolineales;Anaerolineaceae;Anaerolinea
SILVA_128_SSURef_tax_silva_full_align_trunc.fasta.gz	Bacteria;Chloroflexi;Anaerolineae;Anaerolineales;Anaerolineaceae;Anaerolinea
SILVA_132_SSURef_tax_silva.fasta.gz	Bacteria;Chloroflexi;Anaerolineae;Anaerolineales;Anaerolineaceae;Anaerolinea
SILVA_132_SSURef_tax_silva_full_align_trunc.fasta.gz	Bacteria;Chloroflexi;Anaerolineae;Anaerolineales;Anaerolineaceae;Anaerolinea
bac_ssu_r86.1_20180911.fna.gz	Bacteria;Chloroflexota;Anaerolineae;Anaerolineales;Anaerolineaceae;Anaerolinea
20	TACAGAGGGTGCAAGCGTTAATCGGAATTACTGGGCGTAAAGCGCGCGTAGGTGGTTTGTTAAGTTGGAT_CCTGTTTGCTCCCCACGCTTTCGCACCTCAGTGTCAGTATCAGTCCAGGTGGTCGCCTTCGCCACTGGTG
SILVA_123_SSURef_tax_silva.fasta.gz	Bacteria;Proteobacteria;Gammaproteobacteria;Pseudomonadales;Pseudomonadaceae;Pseudomonas
SILVA_123_SSURef_tax_silva_full_align_trunc.fasta.gz	Bacteria;Proteobacteria;Gammaproteobacteria;Pseudomonadales;Pseudomonadaceae;Pseudomonas
SILVA_128_SSURef_tax_silva.fasta.gz	Bacteria;Proteobacteria;Gammaproteobacteria;Pseudomonadales;Pseudomonadaceae;Pseudomonas
SILVA_128_SSURef_tax_silva_full_align_trunc.fasta.gz	Bacteria;Proteobacteria;Gammaproteobacteria;Pseudomonadales;Pseudomonadaceae;Pseudomonas
SILVA_132_SSURef_tax_silva.fasta.gz	Bacteria;Proteobacteria;Gammaproteobacteria;Pseudomonadales;Pseudomonadaceae;Pseudomonas
SILVA_132_SSURef_tax_silva_full_align_trunc.fasta.gz	Bacteria;Proteobacteria;Gammaproteobacteria;Pseudomonadales;Pseudomonadaceae;Pseudomonas
bac_ssu_r86.1_20180911.fna.gz	Bacteria;Proteobacteria;Gammaproteobacteria;Pseudomonadales;Pseudomonadaceae;Pseudomonas_E
21	TACGTAGGGTGCGAGCGTTAATCGGAATTACTGGGCGTAAAGGGTGCGCAGGCGGTCTTGCAAGTCAGAT_CCTGTTTGCTCCCCACGCTTTCGTGCATGAGCGTCAGTGTCAACCCAGGGAGCTGCCTTCGCCATCGGTG
SILVA_123_SSURef_tax_silva.fasta.gz	Bacteria;Proteobacteria;Betaproteobacteria;Nitrosomonadales;Nitrosomonadaceae;Nitrosomonas
SILVA_123_SSURef_tax_silva_full_align_trunc.fasta.gz	Bacteria;Proteobacteria;Betaproteobacteria;Nitrosomonadales;Nitrosomonadaceae;Nitrosomonas
SILVA_128_SSURef_tax_silva.fasta.gz	Bacteria;Proteobacteria;Betaproteobacteria;Nitrosomonadales;Nitrosomonadaceae;Nitrosomonas
SILVA_128_SSURef_tax_silva_full_align_trunc.fasta.gz	Bacteria;Proteobacteria;Betaproteobacteria;Nitrosomonadales;Nitrosomonadaceae;Nitrosomonas
SILVA_132_SSURef_tax_silva.fasta.gz	Bacteria;Proteobacteria;Gammaproteobacteria;Betaproteobacteriales;Nitrosomonadaceae;Nitrosomonas
SILVA_132_SSURef_tax_silva_full_align_trunc.fasta.gz	Bacteria;Proteobacteria;Gammaproteobacteria;Betaproteobacteriales;Nitrosomonadaceae;Nitrosomonas
bac_ssu_r86.1_20180911.fna.gz	Bacteria;Proteobacteria;Gammaproteobacteria;Betaproteobacteriales;Nitrosomonadaceae;Nitrosomonas
22	TACGGAGGGTGCAAGCGTTACCCGGAATCACTGGGCGTAAAGGGCGTGTAGGCGGACACTTAAGTCTGGT_CCGGTTCGCTCCCCACACTTTCGCGCCTCAGCGTCACCTTCTGTCCAAGAACCTGCCTTCGCCACTGGTG
SILVA_123_SSURef_tax_silva.fasta.gz	Bacteria;Deinococcus-Thermus;Deinococci;Deinococcales;Deinococcaceae;Deinococcus
SILVA_123_SSURef_tax_silva_full_align_trunc.fasta.gz	Bacteria;Deinococcus-Thermus;Deinococci;Deinococcales;Deinococcaceae;Deinococcus
SILVA_128_SSURef_tax_silva.fasta.gz	Bacteria;Deinococcus-Thermus;Deinococci;Deinococcales;Deinococcaceae;Deinococcus
SILVA_128_SSURef_tax_silva_full_align_trunc.fasta.gz	Bacteria;Deinococcus-Thermus;Deinococci;Deinococcales;Deinococcaceae;Deinococcus
SILVA_132_SSURef_tax_silva.fasta.gz	Bacteria;Deinococcus-Thermus;Deinococci;Deinococcales;Deinococcaceae;Deinococcus
SILVA_132_SSURef_tax_silva_full_align_trunc.fasta.gz	Bacteria;Deinococcus-Thermus;Deinococci;Deinococcales;Deinococcaceae;Deinococcus
bac_ssu_r86.1_20180911.fna.gz	Bacteria;Deinococcota;Deinococci;Deinococcales;Deinococcaceae;Deinococcus

## Sheet: mock19
1	GACGTAGGTGACGAGCGTTATCCGGATTTACTGGGCGTAAAGCGCGTGCAGGCGGCTCGTTAAGTTGGAT_CCCGTTCGCTCCCCTAGCTTTCGCGTCTGAGCGTCAGTTGCAGCCCAGAGAGCCGCCTTCGCCTCTGGTG
SILVA_123_SSURef_tax_silva.fasta.gz	Bacteria;Chloroflexi;Anaerolineae;Anaerolineales;Anaerolineaceae;Anaerolinea
SILVA_123_SSURef_tax_silva_full_align_trunc.fasta.gz	Bacteria;Chloroflexi;Anaerolineae;Anaerolineales;Anaerolineaceae;Anaerolinea
SILVA_128_SSURef_tax_silva.fasta.gz	Bacteria;Chloroflexi;Anaerolineae;Anaerolineales;Anaerolineaceae;Anaerolinea
SILVA_128_SSURef_tax_silva_full_align_trunc.fasta.gz	Bacteria;Chloroflexi;Anaerolineae;Anaerolineales;Anaerolineaceae;Anaerolinea
SILVA_132_SSURef_tax_silva.fasta.gz	Bacteria;Chloroflexi;Anaerolineae;Anaerolineales;Anaerolineaceae;Anaerolinea
SILVA_132_SSURef_tax_silva_full_align_trunc.fasta.gz	Bacteria;Chloroflexi;Anaerolineae;Anaerolineales;Anaerolineaceae;Anaerolinea
bac_ssu_r86.1_20180911.fna.gz	Bacteria;Chloroflexota;Anaerolineae;Anaerolineales;Anaerolineaceae;Anaerolinea
2	TACGGAGGGTGCGAGCGTTAATCGGAATCACTGGGCGTAAAGCGCACGTAGGCTGCTTGGTAAGTCAGGG_CCTGTTTGCTCCCCACGCTTTCGCACCTCAGCGTCAGTACCGGTCCAGGTAGTCGCCTTCGCCACTGATG
SILVA_123_SSURef_tax_silva.fasta.gz	Bacteria;Proteobacteria;Deltaproteobacteria;Desulfovibrionales;Desulfovibrionaceae;Desulfovibrio
SILVA_123_SSURef_tax_silva_full_align_trunc.fasta.gz	Bacteria;Proteobacteria;Deltaproteobacteria;Desulfovibrionales;Desulfovibrionaceae;Desulfovibrio
SILVA_128_SSURef_tax_silva.fasta.gz	Bacteria;Proteobacteria;Deltaproteobacteria;Desulfovibrionales;Desulfovibrionaceae;Desulfovibrio
SILVA_128_SSURef_tax_silva_full_align_trunc.fasta.gz	Bacteria;Proteobacteria;Deltaproteobacteria;Desulfovibrionales;Desulfovibrionaceae;Desulfovibrio
SILVA_132_SSURef_tax_silva.fasta.gz	Bacteria;Proteobacteria;Deltaproteobacteria;Desulfovibrionales;Desulfovibrionaceae;Desulfovibrio
SILVA_132_SSURef_tax_silva_full_align_trunc.fasta.gz	Bacteria;Proteobacteria;Deltaproteobacteria;Desulfovibrionales;Desulfovibrionaceae;Desulfovibrio
bac_ssu_r86.1_20180911.fna.gz	Bacteria;Desulfobacterota;Desulfovibrionia;Desulfovibrionales;Desulfovibrionaceae;Desulfovibrio_A
3	TACGTAGGTGGCAAGCGTTGTCCGGAATTATTGGGCGTAAAGGGCTCGCAGGCGGTTTCTTAAGTCTGAT_CCTGTTCGCTCCCCACGCTTTCGCTCCTCAGCGTCAGTTACAGACCAGAGAGTCGCCTTCGCCACTGGTG
SILVA_123_SSURef_tax_silva.fasta.gz	Bacteria;Firmicutes;Bacilli;Bacillales;Bacillaceae;Bacillus
SILVA_123_SSURef_tax_silva_full_align_trunc.fasta.gz	Bacteria;Firmicutes;Bacilli;Bacillales;Bacillaceae;Bacillus
SILVA_128_SSURef_tax_silva.fasta.gz	Bacteria;Firmicutes;Bacilli;Bacillales;Bacillaceae;Bacillus
SILVA_128_SSURef_tax_silva_full_align_trunc.fasta.gz	Bacteria;Firmicutes;Bacilli;Bacillales;Bacillaceae;Bacillus
SILVA_132_SSURef_tax_silva.fasta.gz	Bacteria;Firmicutes;Bacilli;Bacillales;Bacillaceae;Bacillus
SILVA_132_SSURef_tax_silva_full_align_trunc.fasta.gz	Bacteria;Firmicutes;Bacilli;Bacillales;Bacillaceae;Bacillus
bac_ssu_r86.1_20180911.fna.gz	Bacteria;Firmicutes;Bacilli;Bacillales;Bacillaceae;Bacillus
4	TACGGAGGGTGCGAGCGTTGCCCGGAATCACTGGGCGTAAAGGGCGCGTAGGCGGTCTGCTAAGCGTGTG_CCTGTTTGCTCCCCACGCTATCGCGCCTCAGCGTCAGCTACTGCCCAGCAGGCCGCCTTCGCCACTGGTG
SILVA_123_SSURef_tax_silva.fasta.gz	Bacteria;Gemmatimonadetes;Gemmatimonadetes;Gemmatimonadales;Gemmatimonadaceae;Gemmatimonas
SILVA_123_SSURef_tax_silva_full_align_trunc.fasta.gz	Bacteria;Gemmatimonadetes;Gemmatimonadetes;Gemmatimonadales;Gemmatimonadaceae;Gemmatimonas
SILVA_128_SSURef_tax_silva.fasta.gz	Bacteria;Gemmatimonadetes;Gemmatimonadetes;Gemmatimonadales;Gemmatimonadaceae;Gemmatimonas
SILVA_128_SSURef_tax_silva_full_align_trunc.fasta.gz	Bacteria;Gemmatimonadetes;Gemmatimonadetes;Gemmatimonadales;Gemmatimonadaceae;Gemmatimonas
SILVA_132_SSURef_tax_silva.fasta.gz	Bacteria;Gemmatimonadetes;Gemmatimonadetes;Gemmatimonadales;Gemmatimonadaceae;Gemmatimonas
SILVA_132_SSURef_tax_silva_full_align_trunc.fasta.gz	Bacteria;Gemmatimonadetes;Gemmatimonadetes;Gemmatimonadales;Gemmatimonadaceae;Gemmatimonas
bac_ssu_r86.1_20180911.fna.gz	Bacteria;Gemmatimonadota;Gemmatimonadetes;Gemmatimonadales;Gemmatimonadaceae;Gemmatimonas
5	GACAGAGGGGGCAAGCGTTGTCCGGCGTTACTGGGCGTAAAGGGCGCGCAGGCGGTGGGCTGCGTCGGCG_CCGGTTTGCTCCCCACGCTGTCGCGCCGCAGCGTCAGGTCAAGCCCAGGTGGCCGGCTTCCCCACCGGCG
SILVA_123_SSURef_tax_silva.fasta.gz	Bacteria;Chloroflexi;Chloroflexia;Chloroflexales;Chloroflexaceae;Chloroflexus
SILVA_123_SSURef_tax_silva_full_align_trunc.fasta.gz	Bacteria;Chloroflexi;Chloroflexia;Chloroflexales;Chloroflexaceae;Chloroflexus
SILVA_128_SSURef_tax_silva.fasta.gz	Bacteria;Chloroflexi;Chloroflexia;Chloroflexales;Chloroflexaceae;Chloroflexus
SILVA_128_SSURef_tax_silva_full_align_trunc.fasta.gz	Bacteria;Chloroflexi;Chloroflexia;Chloroflexales;Chloroflexaceae;Chloroflexus
SILVA_132_SSURef_tax_silva.fasta.gz	Bacteria;Chloroflexi;Chloroflexia;Chloroflexales;Chloroflexaceae;Chloroflexus
SILVA_132_SSURef_tax_silva_full_align_trunc.fasta.gz	Bacteria;Chloroflexi;Chloroflexia;Chloroflexales;Chloroflexaceae;Chloroflexus
bac_ssu_r86.1_20180911.fna.gz	Bacteria;Chloroflexota;Chloroflexia;Chloroflexales;Chloroflexaceae;Chloroflexus
6	TACGAAGGGGGCTAGCGTTGCTCGGAATTACTGGGCGTAAAGGGTGCGTAGGCGGGTCTTTAAGTCAGGG_CCTGTTTGCTCCCCACGCTTTCGTGCCTCAGCGTCAGTATCGGGCCAGTGAGCCGCCTTCGCCACTGGTG
SILVA_123_SSURef_tax_silva.fasta.gz	Bacteria;Proteobacteria;Alphaproteobacteria;Rhizobiales;Bradyrhizobiaceae;Bradyrhizobium
SILVA_123_SSURef_tax_silva_full_align_trunc.fasta.gz	Bacteria;Proteobacteria;Alphaproteobacteria;Rhizobiales;Bradyrhizobiaceae;Bradyrhizobium
SILVA_128_SSURef_tax_silva.fasta.gz	Bacteria;Proteobacteria;Alphaproteobacteria;Rhizobiales;Bradyrhizobiaceae;Bradyrhizobium
SILVA_128_SSURef_tax_silva_full_align_trunc.fasta.gz	Bacteria;Proteobacteria;Alphaproteobacteria;Rhizobiales;Bradyrhizobiaceae;Bradyrhizobium
SILVA_132_SSURef_tax_silva.fasta.gz	Bacteria;Proteobacteria;Alphaproteobacteria;Rhizobiales;Xanthobacteraceae;Bradyrhizobium
SILVA_132_SSURef_tax_silva_full_align_trunc.fasta.gz	Bacteria;Proteobacteria;Alphaproteobacteria;Rhizobiales;Xanthobacteraceae;Bradyrhizobium
bac_ssu_r86.1_20180911.fna.gz	Bacteria;Proteobacteria;Alphaproteobacteria;Rhizobiales;Xanthobacteraceae;Bradyrhizobium
7	GACAGAGGGTGCAAGCGTTGTCCGGAGTTACTGGGCGTAAAGGGCGCGCAGGCGGTGGGCTGCGTCGGCG_CCGGTTTGCTCCCCACGCTGTCGCGCCGCAGCGTCAGGTCAAGCCCAGGTGGCCGGCTTCCCCACCGGCG
SILVA_123_SSURef_tax_silva.fasta.gz	Bacteria;Chloroflexi;Chloroflexia;Chloroflexales;Chloroflexaceae;Chloroflexus
SILVA_123_SSURef_tax_silva_full_align_trunc.fasta.gz	Bacteria;Chloroflexi;Chloroflexia;Chloroflexales;Chloroflexaceae;Chloroflexus
SILVA_128_SSURef_tax_silva.fasta.gz	Bacteria;Chloroflexi;Chloroflexia;Chloroflexales;Chloroflexaceae;Chloroflexus
SILVA_128_SSURef_tax_silva_full_align_trunc.fasta.gz	Bacteria;Chloroflexi;Chloroflexia;Chloroflexales;Chloroflexaceae;Chloroflexus
SILVA_132_SSURef_tax_silva.fasta.gz	Bacteria;Chloroflexi;Chloroflexia;Chloroflexales;Chloroflexaceae;Chloroflexus
SILVA_132_SSURef_tax_silva_full_align_trunc.fasta.gz	Bacteria;Chloroflexi;Chloroflexia;Chloroflexales;Chloroflexaceae;Chloroflexus
bac_ssu_r86.1_20180911.fna.gz	Bacteria;Chloroflexota;Chloroflexia;Chloroflexales;Chloroflexaceae;Chloroflexus
8	TACGGAGGGTGCAAGCGTTACCCGGAATCACTGGGCGTAAAGGGCGTGTAGGCGGACACTTAAGTCTGGT_CCGGTTCGCTCCCCACACTTTCGCGCCTCAGCGTCACCTTCTGTCCAAGAACCTGCCTTCGCCACTGGTG
SILVA_123_SSURef_tax_silva.fasta.gz	Bacteria;Deinococcus-Thermus;Deinococci;Deinococcales;Deinococcaceae;Deinococcus
SILVA_123_SSURef_tax_silva_full_align_trunc.fasta.gz	Bacteria;Deinococcus-Thermus;Deinococci;Deinococcales;Deinococcaceae;Deinococcus
SILVA_128_SSURef_tax_silva.fasta.gz	Bacteria;Deinococcus-Thermus;Deinococci;Deinococcales;Deinococcaceae;Deinococcus
SILVA_128_SSURef_tax_silva_full_align_trunc.fasta.gz	Bacteria;Deinococcus-Thermus;Deinococci;Deinococcales;Deinococcaceae;Deinococcus
SILVA_132_SSURef_tax_silva.fasta.gz	Bacteria;Deinococcus-Thermus;Deinococci;Deinococcales;Deinococcaceae;Deinococcus
SILVA_132_SSURef_tax_silva_full_align_trunc.fasta.gz	Bacteria;Deinococcus-Thermus;Deinococci;Deinococcales;Deinococcaceae;Deinococcus
bac_ssu_r86.1_20180911.fna.gz	Bacteria;Deinococcota;Deinococci;Deinococcales;Deinococcaceae;Deinococcus
9	TACGTAGGGGGCAAGCGTTGTCCGGAATCATTGGGCGTAAAGGGCGCGTAGGCGGATACTTAAGTCTGGT_CCTGTTTGCTCCCCACGCTTTCGCGCCTCAGCGTCAGTTACAGTCCAGAAAGTCGCCTTCGCCACTGGTG
SILVA_123_SSURef_tax_silva.fasta.gz	Bacteria;Firmicutes;Clostridia;Clostridiales;Peptococcaceae;Desulfitobacterium
SILVA_123_SSURef_tax_silva_full_align_trunc.fasta.gz	Bacteria;Firmicutes;Clostridia;Clostridiales;Peptococcaceae;Desulfitobacterium
SILVA_128_SSURef_tax_silva.fasta.gz	Bacteria;Firmicutes;Clostridia;Clostridiales;Peptococcaceae;Desulfitobacterium
SILVA_128_SSURef_tax_silva_full_align_trunc.fasta.gz	Bacteria;Firmicutes;Clostridia;Clostridiales;Peptococcaceae;Desulfitobacterium
SILVA_132_SSURef_tax_silva.fasta.gz	Bacteria;Firmicutes;Clostridia;Clostridiales;Peptococcaceae;Desulfitobacterium
SILVA_132_SSURef_tax_silva_full_align_trunc.fasta.gz	Bacteria;Firmicutes;Clostridia;Clostridiales;Peptococcaceae;Desulfitobacterium
bac_ssu_r86.1_20180911.fna.gz	Bacteria;Firmicutes_B;Desulfitobacteriia;Desulfitobacteriales;Desulfitobacteriaceae;Desulfitobacterium
10	TACCGAGGGTGCAAGCGTTAATCGGAATTACTGGGCGTAAAGCGCGCGTAGGTGGTTTGTTAAGTTGGAT_CCTGTTTGCTCCCCACGCTTTCGCACCTCAGTGTCAGTATCAGTCCAGGTGGTCGCCTTCGCCACTGGTG
SILVA_123_SSURef_tax_silva.fasta.gz	Bacteria;Proteobacteria;Gammaproteobacteria;Pseudomonadales;Pseudomonadaceae;Pseudomonas
SILVA_123_SSURef_tax_silva_full_align_trunc.fasta.gz	Bacteria;Proteobacteria;Gammaproteobacteria;Pseudomonadales;Pseudomonadaceae;Pseudomonas
SILVA_128_SSURef_tax_silva.fasta.gz	Bacteria;Proteobacteria;Gammaproteobacteria;Pseudomonadales;Pseudomonadaceae;Pseudomonas
SILVA_128_SSURef_tax_silva_full_align_trunc.fasta.gz	Bacteria;Proteobacteria;Gammaproteobacteria;Pseudomonadales;Pseudomonadaceae;Pseudomonas
SILVA_132_SSURef_tax_silva.fasta.gz	Bacteria;Proteobacteria;Gammaproteobacteria;Pseudomonadales;Pseudomonadaceae;Pseudomonas
SILVA_132_SSURef_tax_silva_full_align_trunc.fasta.gz	Bacteria;Proteobacteria;Gammaproteobacteria;Pseudomonadales;Pseudomonadaceae;Pseudomonas
bac_ssu_r86.1_20180911.fna.gz	Bacteria;Proteobacteria;Gammaproteobacteria;Pseudomonadales;Pseudomonadaceae;Pseudomonas_E
11	TACAGAGGGTGCAAGCGTTAATCGGAATTACTGGGCGTAAAGCGCGCGTAGGTGGTTTGTTAAGTTGGAT_CCTGTTTGCTCCCCACGCTTTCGCACCTCAGTGTCAGTATCAGTCCAGGTGGTCGCCTTCGCCACTGGTG
SILVA_123_SSURef_tax_silva.fasta.gz	Bacteria;Proteobacteria;Gammaproteobacteria;Pseudomonadales;Pseudomonadaceae;Pseudomonas
SILVA_123_SSURef_tax_silva_full_align_trunc.fasta.gz	Bacteria;Proteobacteria;Gammaproteobacteria;Pseudomonadales;Pseudomonadaceae;Pseudomonas
SILVA_128_SSURef_tax_silva.fasta.gz	Bacteria;Proteobacteria;Gammaproteobacteria;Pseudomonadales;Pseudomonadaceae;Pseudomonas
SILVA_128_SSURef_tax_silva_full_align_trunc.fasta.gz	Bacteria;Proteobacteria;Gammaproteobacteria;Pseudomonadales;Pseudomonadaceae;Pseudomonas
SILVA_132_SSURef_tax_silva.fasta.gz	Bacteria;Proteobacteria;Gammaproteobacteria;Pseudomonadales;Pseudomonadaceae;Pseudomonas
SILVA_132_SSURef_tax_silva_full_align_trunc.fasta.gz	Bacteria;Proteobacteria;Gammaproteobacteria;Pseudomonadales;Pseudomonadaceae;Pseudomonas
bac_ssu_r86.1_20180911.fna.gz	Bacteria;Proteobacteria;Gammaproteobacteria;Pseudomonadales;Pseudomonadaceae;Pseudomonas_E
12	GACGTAGGAGACGAGCGTTATCCGGATTTACTGGGCGTAAAGCGCGTGCAGGCGGCTCGTTAAGTTGGAT_CCCGTTCGCTCCCCTAGCTTTCGCGTCTGAGCGTCAGTTGCAGCCCAGAGAGCCGCCTTCGCCTCTGGTG
SILVA_123_SSURef_tax_silva.fasta.gz	Bacteria;Chloroflexi;Anaerolineae;Anaerolineales;Anaerolineaceae;Anaerolinea
SILVA_123_SSURef_tax_silva_full_align_trunc.fasta.gz	Bacteria;Chloroflexi;Anaerolineae;Anaerolineales;Anaerolineaceae;Anaerolinea
SILVA_128_SSURef_tax_silva.fasta.gz	Bacteria;Chloroflexi;Anaerolineae;Anaerolineales;Anaerolineaceae;Anaerolinea
SILVA_128_SSURef_tax_silva_full_align_trunc.fasta.gz	Bacteria;Chloroflexi;Anaerolineae;Anaerolineales;Anaerolineaceae;Anaerolinea
SILVA_132_SSURef_tax_silva.fasta.gz	Bacteria;Chloroflexi;Anaerolineae;Anaerolineales;Anaerolineaceae;Anaerolinea
SILVA_132_SSURef_tax_silva_full_align_trunc.fasta.gz	Bacteria;Chloroflexi;Anaerolineae;Anaerolineales;Anaerolineaceae;Anaerolinea
bac_ssu_r86.1_20180911.fna.gz	Bacteria;Chloroflexota;Anaerolineae;Anaerolineales;Anaerolineaceae;Anaerolinea
13	TACGTAGGGTGCGAGCGTTAATCGGAATTACTGGGCGTAAAGGGTGCGCAGGCGGTCTTGCAAGTCAGAT_CCTGTTTGCTCCCCACGCTTTCGTGCATGAGCGTCAGTGTCAACCCAGGGAGCTGCCTTCGCCATCGGTG
SILVA_123_SSURef_tax_silva.fasta.gz	Bacteria;Proteobacteria;Betaproteobacteria;Nitrosomonadales;Nitrosomonadaceae;Nitrosomonas
SILVA_123_SSURef_tax_silva_full_align_trunc.fasta.gz	Bacteria;Proteobacteria;Betaproteobacteria;Nitrosomonadales;Nitrosomonadaceae;Nitrosomonas
SILVA_128_SSURef_tax_silva.fasta.gz	Bacteria;Proteobacteria;Betaproteobacteria;Nitrosomonadales;Nitrosomonadaceae;Nitrosomonas
SILVA_128_SSURef_tax_silva_full_align_trunc.fasta.gz	Bacteria;Proteobacteria;Betaproteobacteria;Nitrosomonadales;Nitrosomonadaceae;Nitrosomonas
SILVA_132_SSURef_tax_silva.fasta.gz	Bacteria;Proteobacteria;Gammaproteobacteria;Betaproteobacteriales;Nitrosomonadaceae;Nitrosomonas
SILVA_132_SSURef_tax_silva_full_align_trunc.fasta.gz	Bacteria;Proteobacteria;Gammaproteobacteria;Betaproteobacteriales;Nitrosomonadaceae;Nitrosomonas
bac_ssu_r86.1_20180911.fna.gz	Bacteria;Proteobacteria;Gammaproteobacteria;Betaproteobacteriales;Nitrosomonadaceae;Nitrosomonas
14	CACGTAAGTTGCGAGCGTTGTTCGGAATTATTGGGCGTAAAGGGCATGTAGGCGGTTCTGCAAGTCTGGT_CCTGTTTGCTCCCCGCACCTTCGCACCTCAGCGTCAGTCATCTGCTGGCAGCCTGCCTTCGCCATTGGTA
SILVA_123_SSURef_tax_silva.fasta.gz	Bacteria;Spirochaetae;Spirochaetes;Spirochaetales;Spirochaetaceae;Treponema_2
SILVA_123_SSURef_tax_silva_full_align_trunc.fasta.gz	Bacteria;Spirochaetae;Spirochaetes;Spirochaetales;Spirochaetaceae;Treponema_2
SILVA_128_SSURef_tax_silva.fasta.gz	Bacteria;Spirochaetae;Spirochaetes;Spirochaetales;Spirochaetaceae;Treponema_2
SILVA_128_SSURef_tax_silva_full_align_trunc.fasta.gz	Bacteria;Spirochaetae;Spirochaetes;Spirochaetales;Spirochaetaceae;Treponema_2
SILVA_132_SSURef_tax_silva.fasta.gz	Bacteria;Spirochaetes;Spirochaetia;Spirochaetales;Spirochaetaceae;Treponema_2
SILVA_132_SSURef_tax_silva_full_align_trunc.fasta.gz	Bacteria;Spirochaetes;Spirochaetia;Spirochaetales;Spirochaetaceae;Treponema_2
bac_ssu_r86.1_20180911.fna.gz	Bacteria;Spirochaetota;Spirochaetia;Treponematales;Treponemataceae;Treponema_D
15	TACGGAGGGTGCAAGCGTTAATCGGAATTACTGGGCGTAAAGCGCACGCAGGCGGTTTGTTAAGTCAGAT_CCTGTTTGCTCCCCACGCTTTCGCACCTGAGCGTCAGTCTTCGTCCAGGGGGCCGCCTTCGCCACCGGTA
SILVA_123_SSURef_tax_silva.fasta.gz	Bacteria;Proteobacteria;Gammaproteobacteria;Enterobacteriales;Enterobacteriaceae
SILVA_123_SSURef_tax_silva_full_align_trunc.fasta.gz	Bacteria;Proteobacteria;Gammaproteobacteria;Enterobacteriales;Enterobacteriaceae
SILVA_128_SSURef_tax_silva.fasta.gz	Bacteria;Proteobacteria;Gammaproteobacteria;Enterobacteriales;Enterobacteriaceae
SILVA_128_SSURef_tax_silva_full_align_trunc.fasta.gz	Bacteria;Proteobacteria;Gammaproteobacteria;Enterobacteriales;Enterobacteriaceae
SILVA_132_SSURef_tax_silva.fasta.gz	Bacteria;Proteobacteria;Gammaproteobacteria;Enterobacteriales;Enterobacteriaceae
SILVA_132_SSURef_tax_silva_full_align_trunc.fasta.gz	Bacteria;Proteobacteria;Gammaproteobacteria;Enterobacteriales;Enterobacteriaceae
bac_ssu_r86.1_20180911.fna.gz	Bacteria;Proteobacteria;Gammaproteobacteria;Enterobacterales;Enterobacteriaceae
16	GACCGAGGGGGCAAGCGTTGTCCGGAGTTACTGGGCGTAAAGGGCGCGCAGGCGGTGGGCTGCGTCGGCG_CCGGTTTGCTCCCCACGCTGTCGCGCCGCAGCGTCAGGTCAAGCCCAGGTGGCCGGCTTCCCCACCGGCG
SILVA_123_SSURef_tax_silva.fasta.gz	Bacteria;Chloroflexi;Chloroflexia;Chloroflexales;Chloroflexaceae;Chloroflexus
SILVA_123_SSURef_tax_silva_full_align_trunc.fasta.gz	Bacteria;Chloroflexi;Chloroflexia;Chloroflexales;Chloroflexaceae;Chloroflexus
SILVA_128_SSURef_tax_silva.fasta.gz	Bacteria;Chloroflexi;Chloroflexia;Chloroflexales;Chloroflexaceae;Chloroflexus
SILVA_128_SSURef_tax_silva_full_align_trunc.fasta.gz	Bacteria;Chloroflexi;Chloroflexia;Chloroflexales;Chloroflexaceae;Chloroflexus
SILVA_132_SSURef_tax_silva.fasta.gz	Bacteria;Chloroflexi;Chloroflexia;Chloroflexales;Chloroflexaceae;Chloroflexus
SILVA_132_SSURef_tax_silva_full_align_trunc.fasta.gz	Bacteria;Chloroflexi;Chloroflexia;Chloroflexales;Chloroflexaceae;Chloroflexus
bac_ssu_r86.1_20180911.fna.gz	Bacteria;Chloroflexota;Chloroflexia;Chloroflexales;Chloroflexaceae;Chloroflexus
17	GACAGAGGGGGCAAGCGTTGTCCGGAGTTACTGGGCGTAAAGGGCGCGCAGGCGGTGGGCTGCGTCGGCG_CCGGTTTGCTCCCCACGCTGTCGCGCCGCAGCGTCAGGTCAAGCCCAGGTGGCCGGCTTCCCCACCGGCG
SILVA_123_SSURef_tax_silva.fasta.gz	Bacteria;Chloroflexi;Chloroflexia;Chloroflexales;Chloroflexaceae;Chloroflexus
SILVA_123_SSURef_tax_silva_full_align_trunc.fasta.gz	Bacteria;Chloroflexi;Chloroflexia;Chloroflexales;Chloroflexaceae;Chloroflexus
SILVA_128_SSURef_tax_silva.fasta.gz	Bacteria;Chloroflexi;Chloroflexia;Chloroflexales;Chloroflexaceae;Chloroflexus
SILVA_128_SSURef_tax_silva_full_align_trunc.fasta.gz	Bacteria;Chloroflexi;Chloroflexia;Chloroflexales;Chloroflexaceae;Chloroflexus
SILVA_132_SSURef_tax_silva.fasta.gz	Bacteria;Chloroflexi;Chloroflexia;Chloroflexales;Chloroflexaceae;Chloroflexus
SILVA_132_SSURef_tax_silva_full_align_trunc.fasta.gz	Bacteria;Chloroflexi;Chloroflexia;Chloroflexales;Chloroflexaceae;Chloroflexus
bac_ssu_r86.1_20180911.fna.gz	Bacteria;Chloroflexota;Chloroflexia;Chloroflexales;Chloroflexaceae;Chloroflexus
18	TACGTAGGTGGCAAGCGTTGTCCGGATTTACTGGGCGTAAAGGATGTGTAGGCGGATATTTAAGTGAGAT_CCTGTTTGCTCCCCACGCTTTCATGCCTCAGCGTCAGTTACAGTCCAGAAGGCCGCCTTCGCCACTGGTA
SILVA_123_SSURef_tax_silva.fasta.gz	Bacteria;Firmicutes;Clostridia;Clostridiales;Clostridiaceae_1;Clostridium_sensu_stricto_11
SILVA_123_SSURef_tax_silva_full_align_trunc.fasta.gz	Bacteria;Firmicutes;Clostridia;Clostridiales;Clostridiaceae_1;Clostridium_sensu_stricto_11
SILVA_128_SSURef_tax_silva.fasta.gz	Bacteria;Firmicutes;Clostridia;Clostridiales;Clostridiaceae_1;Clostridium_sensu_stricto_11
SILVA_128_SSURef_tax_silva_full_align_trunc.fasta.gz	Bacteria;Firmicutes;Clostridia;Clostridiales;Clostridiaceae_1;Clostridium_sensu_stricto_11
SILVA_132_SSURef_tax_silva.fasta.gz	Bacteria;Firmicutes;Clostridia;Clostridiales;Clostridiaceae_1;Clostridium_sensu_stricto_11
SILVA_132_SSURef_tax_silva_full_align_trunc.fasta.gz	Bacteria;Firmicutes;Clostridia;Clostridiales;Clostridiaceae_1;Clostridium_sensu_stricto_11
bac_ssu_r86.1_20180911.fna.gz	Bacteria;Firmicutes_A;Clostridia;Clostridiales;Clostridiaceae;Clostridium_S
19	TACGGAGGATCCGAGCGTTATCCGGATTTATTGGGTTTAAAGGGAGCGTAGATGGATATTTAAGTCAGTT_CCTGTTTGATACCCACACTTTCGAGCCTCAATGTCAGTTGCAGCTTAGCAGGCTGCCTTCGCAATCGGAG
SILVA_123_SSURef_tax_silva.fasta.gz	Bacteria;Bacteroidetes;Bacteroidia;Bacteroidales;Bacteroidaceae;Bacteroides
SILVA_123_SSURef_tax_silva_full_align_trunc.fasta.gz	Bacteria;Bacteroidetes;Bacteroidia;Bacteroidales;Bacteroidaceae;Bacteroides
SILVA_128_SSURef_tax_silva.fasta.gz	Bacteria;Bacteroidetes;Bacteroidia;Bacteroidales;Bacteroidaceae;Bacteroides
SILVA_128_SSURef_tax_silva_full_align_trunc.fasta.gz	Bacteria;Bacteroidetes;Bacteroidia;Bacteroidales;Bacteroidaceae;Bacteroides
SILVA_132_SSURef_tax_silva.fasta.gz	Bacteria;Bacteroidetes;Bacteroidia;Bacteroidales;Bacteroidaceae;Bacteroides
SILVA_132_SSURef_tax_silva_full_align_trunc.fasta.gz	Bacteria;Bacteroidetes;Bacteroidia;Bacteroidales;Bacteroidaceae;Bacteroides
bac_ssu_r86.1_20180911.fna.gz	Bacteria;Bacteroidota

## Sheet: mock20
1	TACGTAGGTCCCGAGCGTTGTCCGGATTTATTGGGCGTAAAGGGAGCGCAGGCGGTCAGGAAAGTCTGGA_CCTGTTCGCTACCCACGCTTTCGAGCCTCAGCGTCAGTGACAGACCAGAGAGCCGCCTTCGCCACTGGTG
SILVA_123_SSURef_tax_silva.fasta.gz	Bacteria;Firmicutes;Bacilli;Lactobacillales;Streptococcaceae;Streptococcus
SILVA_123_SSURef_tax_silva_full_align_trunc.fasta.gz	Bacteria;Firmicutes;Bacilli;Lactobacillales;Streptococcaceae;Streptococcus
SILVA_128_SSURef_tax_silva.fasta.gz	Bacteria;Firmicutes;Bacilli;Lactobacillales;Streptococcaceae;Streptococcus
SILVA_128_SSURef_tax_silva_full_align_trunc.fasta.gz	Bacteria;Firmicutes;Bacilli;Lactobacillales;Streptococcaceae;Streptococcus
SILVA_132_SSURef_tax_silva.fasta.gz	Bacteria;Firmicutes;Bacilli;Lactobacillales;Streptococcaceae;Streptococcus
SILVA_132_SSURef_tax_silva_full_align_trunc.fasta.gz	Bacteria;Firmicutes;Bacilli;Lactobacillales;Streptococcaceae;Streptococcus
bac_ssu_r86.1_20180911.fna.gz	Bacteria;Firmicutes;Bacilli;Lactobacillales;Streptococcaceae;Streptococcus
2	TACGGAGGGTGCAAGCGTTACCCGGAATCACTGGGCGTAAAGGGCGTGTAGGCGGAAATTTAAGTCTGGT_CCGGTTTGCTCCCCACACTTTCGCGCCTCAGCGTCACCTTCTGTCCAGTAACTTGCCTTCGCCATTGGTG
SILVA_123_SSURef_tax_silva.fasta.gz	Bacteria;Deinococcus-Thermus;Deinococci;Deinococcales;Deinococcaceae;Deinococcus
SILVA_123_SSURef_tax_silva_full_align_trunc.fasta.gz	Bacteria;Deinococcus-Thermus;Deinococci;Deinococcales;Deinococcaceae;Deinococcus
SILVA_128_SSURef_tax_silva.fasta.gz	Bacteria;Deinococcus-Thermus;Deinococci;Deinococcales;Deinococcaceae;Deinococcus
SILVA_128_SSURef_tax_silva_full_align_trunc.fasta.gz	Bacteria;Deinococcus-Thermus;Deinococci;Deinococcales;Deinococcaceae;Deinococcus
SILVA_132_SSURef_tax_silva.fasta.gz	Bacteria;Deinococcus-Thermus;Deinococci;Deinococcales;Deinococcaceae;Deinococcus
SILVA_132_SSURef_tax_silva_full_align_trunc.fasta.gz	Bacteria;Deinococcus-Thermus;Deinococci;Deinococcales;Deinococcaceae;Deinococcus
bac_ssu_r86.1_20180911.fna.gz	Bacteria;Deinococcota;Deinococci;Deinococcales;Deinococcaceae;Deinococcus
3	TACGTAGGTGGCAAGCGTTATCCGGAATTATTGGGCGTAAAGCGCGCGTAGGCGGTTTTTTAAGTCTGAT_CCTGTTTGATCCCCACGCTTTCGCACCTCAGCGTCAGTTACAGACCAGAAAGTCGCCTTCGCCACTGGTG
SILVA_123_SSURef_tax_silva.fasta.gz	Bacteria;Firmicutes;Bacilli;Bacillales;Staphylococcaceae;Staphylococcus
SILVA_123_SSURef_tax_silva_full_align_trunc.fasta.gz	Bacteria;Firmicutes;Bacilli;Bacillales;Staphylococcaceae;Staphylococcus
SILVA_128_SSURef_tax_silva.fasta.gz	Bacteria;Firmicutes;Bacilli;Bacillales;Staphylococcaceae;Staphylococcus
SILVA_128_SSURef_tax_silva_full_align_trunc.fasta.gz	Bacteria;Firmicutes;Bacilli;Bacillales;Staphylococcaceae;Staphylococcus
SILVA_132_SSURef_tax_silva.fasta.gz	Bacteria;Firmicutes;Bacilli;Bacillales;Staphylococcaceae;Staphylococcus
SILVA_132_SSURef_tax_silva_full_align_trunc.fasta.gz	Bacteria;Firmicutes;Bacilli;Bacillales;Staphylococcaceae;Staphylococcus
bac_ssu_r86.1_20180911.fna.gz	Bacteria;Firmicutes;Bacilli;Staphylococcales;Staphylococcaceae;Staphylococcus
4	TACGGAGGGTGCAAGCGTTACTCGGAATCACTGGGCGTAAAGAGCGCGTAGGCGGGATAGTCAGTCAGGT_CCTGTTTGCTCCCCACGCTTTCGCGCACTCAGCGTCAGTAATGTTCCAGCAGGTCGCCTTCGCAATGAGT
SILVA_123_SSURef_tax_silva.fasta.gz	Bacteria;Proteobacteria;Epsilonproteobacteria;Campylobacterales;Helicobacteraceae;Helicobacter
SILVA_123_SSURef_tax_silva_full_align_trunc.fasta.gz	Bacteria;Proteobacteria;Epsilonproteobacteria;Campylobacterales;Helicobacteraceae;Helicobacter
SILVA_128_SSURef_tax_silva.fasta.gz	Bacteria;Proteobacteria;Epsilonproteobacteria;Campylobacterales;Helicobacteraceae;Helicobacter
SILVA_128_SSURef_tax_silva_full_align_trunc.fasta.gz	Bacteria;Proteobacteria;Epsilonproteobacteria;Campylobacterales;Helicobacteraceae;Helicobacter
SILVA_132_SSURef_tax_silva.fasta.gz	Bacteria;Epsilonbacteraeota;Campylobacteria;Campylobacterales;Helicobacteraceae;Helicobacter
SILVA_132_SSURef_tax_silva_full_align_trunc.fasta.gz	Bacteria;Epsilonbacteraeota;Campylobacteria;Campylobacterales;Helicobacteraceae;Helicobacter
bac_ssu_r86.1_20180911.fna.gz	Bacteria;Campylobacterota;Campylobacteria;Campylobacterales;Helicobacteraceae;Helicobacter
5	TACGGAGGGTGCAAGCGTTAATCGGAATTACTGGGCGTAAAGCGCACGCAGGCGGTTTGTTAAGTCAGAT_CCTGTTTGCTCCCCACGCTTTCGCACCTGAGCGTCAGTCTTCGTCCAGGGGGCCGCCTTCGCCACCGGTC
SILVA_123_SSURef_tax_silva.fasta.gz	Bacteria;Proteobacteria;Gammaproteobacteria;Enterobacteriales;Enterobacteriaceae
SILVA_123_SSURef_tax_silva_full_align_trunc.fasta.gz	Bacteria;Proteobacteria;Gammaproteobacteria;Enterobacteriales;Enterobacteriaceae
SILVA_128_SSURef_tax_silva.fasta.gz	Bacteria;Proteobacteria;Gammaproteobacteria;Enterobacteriales;Enterobacteriaceae
SILVA_128_SSURef_tax_silva_full_align_trunc.fasta.gz	Bacteria;Proteobacteria;Gammaproteobacteria;Enterobacteriales;Enterobacteriaceae
SILVA_132_SSURef_tax_silva.fasta.gz	Bacteria;Proteobacteria;Gammaproteobacteria;Enterobacteriales;Enterobacteriaceae
SILVA_132_SSURef_tax_silva_full_align_trunc.fasta.gz	Bacteria;Proteobacteria;Gammaproteobacteria;Enterobacteriales;Enterobacteriaceae
bac_ssu_r86.1_20180911.fna.gz	Bacteria;Proteobacteria;Gammaproteobacteria;Enterobacterales;Enterobacteriaceae
6	TACGGAGGGTGCAAGCGTTAATCGGAATTACTGGGCGTAAAGCGCACGCAGGCGGTTTGTTAAGTCAGAT_CCTGTTTGCTCCCCACGCTTTCGCACCTGAGCGTCAGTCTTCGTCCAGGGGGCCGCCTTCGCCACCGGTA
SILVA_123_SSURef_tax_silva.fasta.gz	Bacteria;Proteobacteria;Gammaproteobacteria;Enterobacteriales;Enterobacteriaceae
SILVA_123_SSURef_tax_silva_full_align_trunc.fasta.gz	Bacteria;Proteobacteria;Gammaproteobacteria;Enterobacteriales;Enterobacteriaceae
SILVA_128_SSURef_tax_silva.fasta.gz	Bacteria;Proteobacteria;Gammaproteobacteria;Enterobacteriales;Enterobacteriaceae
SILVA_128_SSURef_tax_silva_full_align_trunc.fasta.gz	Bacteria;Proteobacteria;Gammaproteobacteria;Enterobacteriales;Enterobacteriaceae
SILVA_132_SSURef_tax_silva.fasta.gz	Bacteria;Proteobacteria;Gammaproteobacteria;Enterobacteriales;Enterobacteriaceae
SILVA_132_SSURef_tax_silva_full_align_trunc.fasta.gz	Bacteria;Proteobacteria;Gammaproteobacteria;Enterobacteriales;Enterobacteriaceae
bac_ssu_r86.1_20180911.fna.gz	Bacteria;Proteobacteria;Gammaproteobacteria;Enterobacterales;Enterobacteriaceae
7	TACGTAGGTGGCAAGCGTTGTCCGGATTTATTGGGCGTAAAGCGAGCGCAGGCGGTTCTTTAAGTCTGAA_CCTGTTTGCTCCCCACGCTTTCGAGCCTCAGCGTCAGTTACAGACCAGAGAGCCGCTTTCGCCACCGGTG
SILVA_123_SSURef_tax_silva.fasta.gz	Bacteria;Firmicutes;Bacilli;Lactobacillales;Streptococcaceae;Streptococcus
SILVA_123_SSURef_tax_silva_full_align_trunc.fasta.gz	Bacteria;Firmicutes;Bacilli;Lactobacillales;Streptococcaceae;Streptococcus
SILVA_128_SSURef_tax_silva.fasta.gz	Bacteria;Firmicutes;Bacilli;Lactobacillales;Streptococcaceae;Streptococcus
SILVA_128_SSURef_tax_silva_full_align_trunc.fasta.gz	Bacteria;Firmicutes;Bacilli;Lactobacillales;Streptococcaceae;Streptococcus
SILVA_132_SSURef_tax_silva.fasta.gz	Bacteria;Firmicutes;Bacilli;Lactobacillales;Streptococcaceae;Streptococcus
SILVA_132_SSURef_tax_silva_full_align_trunc.fasta.gz	Bacteria;Firmicutes;Bacilli;Lactobacillales;Streptococcaceae;Streptococcus
bac_ssu_r86.1_20180911.fna.gz	Bacteria;Firmicutes;Bacilli;Lactobacillales
8	TACGGAGGGGGCTAGCGTTATTCGGAATTACTGGGCGTAAAGCGCACGTAGGCGGATCGGAAAGTCAGAG_CCTGTTTGCTCCCCACGCTTTCGCACCTCAGCGTCAGTATCGAGCCAGTGAGCCGCCTTCGCCACTGGTG
SILVA_123_SSURef_tax_silva.fasta.gz	Bacteria;Proteobacteria;Alphaproteobacteria;Rhodobacterales;Rhodobacteraceae;Rhodobacter
SILVA_123_SSURef_tax_silva_full_align_trunc.fasta.gz	Bacteria;Proteobacteria;Alphaproteobacteria;Rhodobacterales;Rhodobacteraceae;Rhodobacter
SILVA_128_SSURef_tax_silva.fasta.gz	Bacteria;Proteobacteria;Alphaproteobacteria;Rhodobacterales;Rhodobacteraceae;Rhodobacter
SILVA_128_SSURef_tax_silva_full_align_trunc.fasta.gz	Bacteria;Proteobacteria;Alphaproteobacteria;Rhodobacterales;Rhodobacteraceae;Rhodobacter
SILVA_132_SSURef_tax_silva.fasta.gz	Bacteria;Proteobacteria;Alphaproteobacteria;Rhodobacterales;Rhodobacteraceae;Rhodobacter
SILVA_132_SSURef_tax_silva_full_align_trunc.fasta.gz	Bacteria;Proteobacteria;Alphaproteobacteria;Rhodobacterales;Rhodobacteraceae;Rhodobacter
bac_ssu_r86.1_20180911.fna.gz	Bacteria;Proteobacteria;Alphaproteobacteria;Rhodobacterales;Rhodobacteraceae;Rhodobacter_A
9	TACGTAGGTGGCAAGCGTTGTCCGGATTTATTGGGCGTAAAGCGAGTGCAGGCGGTTCAATAAGTCTGAT_CCTGTTTGCTCCCCACGCTTTCGAGCCTCAGCGTCAGTTGCAGACCAGAGAGCCGCCTTCGCCACTGGTG
SILVA_123_SSURef_tax_silva.fasta.gz	Bacteria;Firmicutes;Bacilli;Lactobacillales;Lactobacillaceae;Lactobacillus
SILVA_123_SSURef_tax_silva_full_align_trunc.fasta.gz	Bacteria;Firmicutes;Bacilli;Lactobacillales;Lactobacillaceae;Lactobacillus
SILVA_128_SSURef_tax_silva.fasta.gz	Bacteria;Firmicutes;Bacilli;Lactobacillales;Lactobacillaceae;Lactobacillus
SILVA_128_SSURef_tax_silva_full_align_trunc.fasta.gz	Bacteria;Firmicutes;Bacilli;Lactobacillales;Lactobacillaceae;Lactobacillus
SILVA_132_SSURef_tax_silva.fasta.gz	Bacteria;Firmicutes;Bacilli;Lactobacillales;Lactobacillaceae;Lactobacillus
SILVA_132_SSURef_tax_silva_full_align_trunc.fasta.gz	Bacteria;Firmicutes;Bacilli;Lactobacillales;Lactobacillaceae;Lactobacillus
bac_ssu_r86.1_20180911.fna.gz	Bacteria;Firmicutes;Bacilli;Lactobacillales;Lactobacillaceae;Lactobacillus
10	TACGTAGGTCCCGAGCGTTGTCCGGATTTATTGGGCGTAAAGCGAGCGCAGGCGGTTAGATAAGTCTGAA_CCTGTTTGCTCCCCACGCTTTCGAGCCTCAGCGTCAGTTACAAGCCAGAGAGCCGCCTTCGCCACCGGTG
SILVA_123_SSURef_tax_silva.fasta.gz	Bacteria;Firmicutes;Bacilli;Lactobacillales;Streptococcaceae;Streptococcus
SILVA_123_SSURef_tax_silva_full_align_trunc.fasta.gz	Bacteria;Firmicutes;Bacilli;Lactobacillales;Streptococcaceae;Streptococcus
SILVA_128_SSURef_tax_silva.fasta.gz	Bacteria;Firmicutes;Bacilli;Lactobacillales;Streptococcaceae;Streptococcus
SILVA_128_SSURef_tax_silva_full_align_trunc.fasta.gz	Bacteria;Firmicutes;Bacilli;Lactobacillales;Streptococcaceae;Streptococcus
SILVA_132_SSURef_tax_silva.fasta.gz	Bacteria;Firmicutes;Bacilli;Lactobacillales;Streptococcaceae;Streptococcus
SILVA_132_SSURef_tax_silva_full_align_trunc.fasta.gz	Bacteria;Firmicutes;Bacilli;Lactobacillales;Streptococcaceae;Streptococcus
bac_ssu_r86.1_20180911.fna.gz	Bacteria;Firmicutes;Bacilli;Lactobacillales;Streptococcaceae;Streptococcus
11	TACAGAGGGTGCGAGCGTTAATCGGATTTACTGGGCGTAAAGCGTGCGTAGGCGGCTTATTAAGTCGGAT_CCTGTTTGCTCCCCACGCTTTCGTACCTCAGCGTCAGTATTAGGCCAGATGGCTGCCTTCGCCATCGGTA
SILVA_123_SSURef_tax_silva.fasta.gz	Bacteria;Proteobacteria;Gammaproteobacteria;Pseudomonadales;Moraxellaceae;Acinetobacter
SILVA_123_SSURef_tax_silva_full_align_trunc.fasta.gz	Bacteria;Proteobacteria;Gammaproteobacteria;Pseudomonadales;Moraxellaceae;Acinetobacter
SILVA_128_SSURef_tax_silva.fasta.gz	Bacteria;Proteobacteria;Gammaproteobacteria;Pseudomonadales;Moraxellaceae;Acinetobacter
SILVA_128_SSURef_tax_silva_full_align_trunc.fasta.gz	Bacteria;Proteobacteria;Gammaproteobacteria;Pseudomonadales;Moraxellaceae;Acinetobacter
SILVA_132_SSURef_tax_silva.fasta.gz	Bacteria;Proteobacteria;Gammaproteobacteria;Pseudomonadales;Moraxellaceae;Acinetobacter
SILVA_132_SSURef_tax_silva_full_align_trunc.fasta.gz	Bacteria;Proteobacteria;Gammaproteobacteria;Pseudomonadales;Moraxellaceae;Acinetobacter
bac_ssu_r86.1_20180911.fna.gz	Bacteria;Proteobacteria;Gammaproteobacteria;Pseudomonadales;Moraxellaceae;Acinetobacter
12	TACGTAGGTGGCAAGCGTTATCCGGAATTATTGGGCGTAAAGCGCGCGTAGGCGGTTTTTTAAGTCTGAT_CCTGTTTGATCCCCACGCTTTCGCACATCAGCGTCAGTTACAGACCCGAAAGTCGCCTTCGCCACTGGTG
SILVA_123_SSURef_tax_silva.fasta.gz	Bacteria;Firmicutes;Bacilli;Bacillales;Staphylococcaceae;Staphylococcus
SILVA_123_SSURef_tax_silva_full_align_trunc.fasta.gz	Bacteria;Firmicutes;Bacilli;Bacillales;Staphylococcaceae;Staphylococcus
SILVA_128_SSURef_tax_silva.fasta.gz	Bacteria;Firmicutes;Bacilli;Bacillales;Staphylococcaceae;Staphylococcus
SILVA_128_SSURef_tax_silva_full_align_trunc.fasta.gz	Bacteria;Firmicutes;Bacilli;Bacillales;Staphylococcaceae;Staphylococcus
SILVA_132_SSURef_tax_silva.fasta.gz	Bacteria;Firmicutes;Bacilli;Bacillales;Staphylococcaceae;Staphylococcus
SILVA_132_SSURef_tax_silva_full_align_trunc.fasta.gz	Bacteria;Firmicutes;Bacilli;Bacillales;Staphylococcaceae;Staphylococcus
bac_ssu_r86.1_20180911.fna.gz	Bacteria;Firmicutes;Bacilli;Staphylococcales;Staphylococcaceae;Staphylococcus
13	TACGTAGGTGGCAAGCGTTATCCGGAATTATTGGGCGTAAAGCGCGCGCAGGCGGTCTTTTAAGTCTGAT_CCTGTTTGCTCCCCACGCTTTCGCGCCTCAGCGTCAGTTACAGACCAGAGAGTCGCCTTCGCCACTGGTG
SILVA_123_SSURef_tax_silva.fasta.gz	Bacteria;Firmicutes;Bacilli;Bacillales;Bacillaceae;Bacillus
SILVA_123_SSURef_tax_silva_full_align_trunc.fasta.gz	Bacteria;Firmicutes;Bacilli;Bacillales;Bacillaceae;Bacillus
SILVA_128_SSURef_tax_silva.fasta.gz	Bacteria;Firmicutes;Bacilli;Bacillales;Bacillaceae;Bacillus
SILVA_128_SSURef_tax_silva_full_align_trunc.fasta.gz	Bacteria;Firmicutes;Bacilli;Bacillales;Bacillaceae;Bacillus
SILVA_132_SSURef_tax_silva.fasta.gz	Bacteria;Firmicutes;Bacilli;Bacillales;Listeriaceae;Listeria
SILVA_132_SSURef_tax_silva_full_align_trunc.fasta.gz	Bacteria;Firmicutes;Bacilli;Bacillales;Listeriaceae;Listeria
bac_ssu_r86.1_20180911.fna.gz	Bacteria;Firmicutes;Bacilli;Bacillales
14	TACGTAGGTCCCGAGCGTTGTCCGGATTTATTGGGCGTAAAGCGAGCGCAGGCGGTTAGATAAGTCTGAA_CCTGTTTGCTCCCCACGCTTTCGCGCCTCAGCGTCAGTTACAAGCCAGAGAGCCGCTTTCGCCACCGGTG
SILVA_123_SSURef_tax_silva.fasta.gz	Bacteria;Firmicutes;Bacilli;Lactobacillales;Streptococcaceae;Streptococcus
SILVA_123_SSURef_tax_silva_full_align_trunc.fasta.gz	Bacteria;Firmicutes;Bacilli;Lactobacillales;Streptococcaceae;Streptococcus
SILVA_128_SSURef_tax_silva.fasta.gz	Bacteria;Firmicutes;Bacilli;Lactobacillales;Streptococcaceae;Streptococcus
SILVA_128_SSURef_tax_silva_full_align_trunc.fasta.gz	Bacteria;Firmicutes;Bacilli;Lactobacillales;Streptococcaceae;Streptococcus
SILVA_132_SSURef_tax_silva.fasta.gz	Bacteria;Firmicutes;Bacilli;Lactobacillales;Streptococcaceae;Streptococcus
SILVA_132_SSURef_tax_silva_full_align_trunc.fasta.gz	Bacteria;Firmicutes;Bacilli;Lactobacillales;Streptococcaceae;Streptococcus
bac_ssu_r86.1_20180911.fna.gz	Bacteria;Firmicutes;Bacilli;Lactobacillales;Streptococcaceae;Streptococcus
15	TACGGAGGGTGCAAGCGTTACTCGGAATCACTGGGCGTAAAGAGCGCGTAGGCGGGATAGTCAGTCAGGT_CCTGTTTGCTCCCCACGCTTTCGCGCAATCAGCGTCAGTAATGTTCCAGCAGGTCGCCTTCGCAATGCGT
SILVA_123_SSURef_tax_silva.fasta.gz	Bacteria;Proteobacteria;Epsilonproteobacteria;Campylobacterales;Helicobacteraceae;Helicobacter
SILVA_123_SSURef_tax_silva_full_align_trunc.fasta.gz	Bacteria;Proteobacteria;Epsilonproteobacteria;Campylobacterales;Helicobacteraceae;Helicobacter
SILVA_128_SSURef_tax_silva.fasta.gz	Bacteria;Proteobacteria;Epsilonproteobacteria;Campylobacterales;Helicobacteraceae;Helicobacter
SILVA_128_SSURef_tax_silva_full_align_trunc.fasta.gz	Bacteria;Proteobacteria;Epsilonproteobacteria;Campylobacterales;Helicobacteraceae;Helicobacter
SILVA_132_SSURef_tax_silva.fasta.gz	Bacteria;Epsilonbacteraeota;Campylobacteria;Campylobacterales;Helicobacteraceae;Helicobacter
SILVA_132_SSURef_tax_silva_full_align_trunc.fasta.gz	Bacteria;Epsilonbacteraeota;Campylobacteria;Campylobacterales;Helicobacteraceae;Helicobacter
bac_ssu_r86.1_20180911.fna.gz	Bacteria;Campylobacterota;Campylobacteria;Campylobacterales;Helicobacteraceae;Helicobacter
16	TACAGAGGGTGCGAGCGTTAATCGGATTTACTGGGCGTAAAGCGTGCGTAGGCGGCTTATTAAGTCGGAT_CCTGTTTGCTCCCCATGCTTTCGCACCTCAGCGTCAGTATTAGGCCAGATGGCTGCCTTCGCCATCGGTA
SILVA_123_SSURef_tax_silva.fasta.gz	Bacteria;Proteobacteria;Gammaproteobacteria;Pseudomonadales;Moraxellaceae;Acinetobacter
SILVA_123_SSURef_tax_silva_full_align_trunc.fasta.gz	Bacteria;Proteobacteria;Gammaproteobacteria;Pseudomonadales;Moraxellaceae;Acinetobacter
SILVA_128_SSURef_tax_silva.fasta.gz	Bacteria;Proteobacteria;Gammaproteobacteria;Pseudomonadales;Moraxellaceae;Acinetobacter
SILVA_128_SSURef_tax_silva_full_align_trunc.fasta.gz	Bacteria;Proteobacteria;Gammaproteobacteria;Pseudomonadales;Moraxellaceae;Acinetobacter
SILVA_132_SSURef_tax_silva.fasta.gz	Bacteria;Proteobacteria;Gammaproteobacteria;Pseudomonadales;Moraxellaceae;Acinetobacter
SILVA_132_SSURef_tax_silva_full_align_trunc.fasta.gz	Bacteria;Proteobacteria;Gammaproteobacteria;Pseudomonadales;Moraxellaceae;Acinetobacter
bac_ssu_r86.1_20180911.fna.gz	Bacteria;Proteobacteria;Gammaproteobacteria;Pseudomonadales;Moraxellaceae;Acinetobacter
17	TACGTAGGGCGCGAGCGTTGTCCGGAATTATTGGGCGTAAAGGGCTTGTAGGCGGTTGGTCGCGTCTGCC_CCTGTTCGCTCCCCACGCTTTCGCTCCTCAGCGTCAGTAACGGCCCAGAGACCCGCCTTCGCCACCGGTG
SILVA_123_SSURef_tax_silva.fasta.gz	Bacteria;Actinobacteria;Actinobacteria;Actinomycetales;Actinomycetaceae;Actinomyces
SILVA_123_SSURef_tax_silva_full_align_trunc.fasta.gz	Bacteria;Actinobacteria;Actinobacteria;Actinomycetales;Actinomycetaceae;Actinomyces
SILVA_128_SSURef_tax_silva.fasta.gz	Bacteria;Actinobacteria;Actinobacteria;Actinomycetales;Actinomycetaceae;Actinomyces
SILVA_128_SSURef_tax_silva_full_align_trunc.fasta.gz	Bacteria;Actinobacteria;Actinobacteria;Actinomycetales;Actinomycetaceae;Actinomyces
SILVA_132_SSURef_tax_silva.fasta.gz	Bacteria;Actinobacteria;Actinobacteria;Actinomycetales;Actinomycetaceae;Actinomyces
SILVA_132_SSURef_tax_silva_full_align_trunc.fasta.gz	Bacteria;Actinobacteria;Actinobacteria;Actinomycetales;Actinomycetaceae;Actinomyces
bac_ssu_r86.1_20180911.fna.gz	Bacteria;Actinobacteriota;Actinobacteria;Actinomycetales;Actinomycetaceae;Actinomyces_B
18	TACGTAGGTCCCGAGCGTTGTCCGGATTTATTGGGCGTAAAGCGAGCGCAGGCGGTTAGATAAGTCTGAA_CCTGTTTGCTCCCCACGCTTTCGAGCCTCAGCGTCAGTTACAAGCCAGAGAGCCGCTTTCGCCACCGGTG
SILVA_123_SSURef_tax_silva.fasta.gz	Bacteria;Firmicutes;Bacilli;Lactobacillales;Streptococcaceae;Streptococcus
SILVA_123_SSURef_tax_silva_full_align_trunc.fasta.gz	Bacteria;Firmicutes;Bacilli;Lactobacillales;Streptococcaceae;Streptococcus
SILVA_128_SSURef_tax_silva.fasta.gz	Bacteria;Firmicutes;Bacilli;Lactobacillales;Streptococcaceae;Streptococcus
SILVA_128_SSURef_tax_silva_full_align_trunc.fasta.gz	Bacteria;Firmicutes;Bacilli;Lactobacillales;Streptococcaceae;Streptococcus
SILVA_132_SSURef_tax_silva.fasta.gz	Bacteria;Firmicutes;Bacilli;Lactobacillales;Streptococcaceae;Streptococcus
SILVA_132_SSURef_tax_silva_full_align_trunc.fasta.gz	Bacteria;Firmicutes;Bacilli;Lactobacillales;Streptococcaceae;Streptococcus
bac_ssu_r86.1_20180911.fna.gz	Bacteria;Firmicutes;Bacilli;Lactobacillales;Streptococcaceae;Streptococcus
19	TACGGAGGGTGCAAGCGTTACTCGGAATCACTGGGCGTAAAGAGCGCGTAGGCGGGATAGTCAGTCAGGT_CCTGTTTGCTCCCCACGCTTTCGCGCAATCAGCGTCAGTAATGTTCCAGCAGGTCGCCTTCGCAATGAGT
SILVA_123_SSURef_tax_silva.fasta.gz	Bacteria;Proteobacteria;Epsilonproteobacteria;Campylobacterales;Helicobacteraceae;Helicobacter
SILVA_123_SSURef_tax_silva_full_align_trunc.fasta.gz	Bacteria;Proteobacteria;Epsilonproteobacteria;Campylobacterales;Helicobacteraceae;Helicobacter
SILVA_128_SSURef_tax_silva.fasta.gz	Bacteria;Proteobacteria;Epsilonproteobacteria;Campylobacterales;Helicobacteraceae;Helicobacter
SILVA_128_SSURef_tax_silva_full_align_trunc.fasta.gz	Bacteria;Proteobacteria;Epsilonproteobacteria;Campylobacterales;Helicobacteraceae;Helicobacter
SILVA_132_SSURef_tax_silva.fasta.gz	Bacteria;Epsilonbacteraeota;Campylobacteria;Campylobacterales;Helicobacteraceae;Helicobacter
SILVA_132_SSURef_tax_silva_full_align_trunc.fasta.gz	Bacteria;Epsilonbacteraeota;Campylobacteria;Campylobacterales;Helicobacteraceae;Helicobacter
bac_ssu_r86.1_20180911.fna.gz	Bacteria;Campylobacterota;Campylobacteria;Campylobacterales;Helicobacteraceae;Helicobacter
20	TACAGAGGGTGCGAGCGTTAATCGGATTTACTGGGCGTAAAGCGTGCGTAGGCGGCTTATTAAGTCGGAT_CCTGTTTGCTCCCCATGCTTTCGTACCTCAGCGTCAGTATTAGTCCAGATGGCTGCCTTCGCCATCGGTA
SILVA_123_SSURef_tax_silva.fasta.gz	Bacteria;Proteobacteria;Gammaproteobacteria;Pseudomonadales;Moraxellaceae;Acinetobacter
SILVA_123_SSURef_tax_silva_full_align_trunc.fasta.gz	Bacteria;Proteobacteria;Gammaproteobacteria;Pseudomonadales;Moraxellaceae;Acinetobacter
SILVA_128_SSURef_tax_silva.fasta.gz	Bacteria;Proteobacteria;Gammaproteobacteria;Pseudomonadales;Moraxellaceae;Acinetobacter
SILVA_128_SSURef_tax_silva_full_align_trunc.fasta.gz	Bacteria;Proteobacteria;Gammaproteobacteria;Pseudomonadales;Moraxellaceae;Acinetobacter
SILVA_132_SSURef_tax_silva.fasta.gz	Bacteria;Proteobacteria;Gammaproteobacteria;Pseudomonadales;Moraxellaceae;Acinetobacter
SILVA_132_SSURef_tax_silva_full_align_trunc.fasta.gz	Bacteria;Proteobacteria;Gammaproteobacteria;Pseudomonadales;Moraxellaceae;Acinetobacter
bac_ssu_r86.1_20180911.fna.gz	Bacteria;Proteobacteria;Gammaproteobacteria;Pseudomonadales;Moraxellaceae;Acinetobacter
21	TACGTAGGTGGCAAGCGTTGTCCGGATTTACTGGGCGTAAAGGGAGCGTAGGTGGATATTTAAGTGGGAT_CCTGTTTGCTCCCCACGCTTTCGCGCCTCAGTGTCAGTTACAGACCAGAAAGTCGCCTTCGCCACTGGTA
SILVA_123_SSURef_tax_silva.fasta.gz	Bacteria;Firmicutes;Clostridia;Clostridiales;Clostridiaceae_1;Clostridium_sensu_stricto_1
SILVA_123_SSURef_tax_silva_full_align_trunc.fasta.gz	Bacteria;Firmicutes;Clostridia;Clostridiales;Clostridiaceae_1;Clostridium_sensu_stricto_1
SILVA_128_SSURef_tax_silva.fasta.gz	Bacteria;Firmicutes;Clostridia;Clostridiales;Clostridiaceae_1;Clostridium_sensu_stricto_1
SILVA_128_SSURef_tax_silva_full_align_trunc.fasta.gz	Bacteria;Firmicutes;Clostridia;Clostridiales;Clostridiaceae_1;Clostridium_sensu_stricto_1
SILVA_132_SSURef_tax_silva.fasta.gz	Bacteria;Firmicutes;Clostridia;Clostridiales;Clostridiaceae_1;Clostridium_sensu_stricto_1
SILVA_132_SSURef_tax_silva_full_align_trunc.fasta.gz	Bacteria;Firmicutes;Clostridia;Clostridiales;Clostridiaceae_1;Clostridium_sensu_stricto_1
bac_ssu_r86.1_20180911.fna.gz	Bacteria;Firmicutes_A;Clostridia;Clostridiales;Clostridiaceae;Clostridium
22	TACGTAGGTGGCAAGCGTTATCCGGAATTATTGGGCGTAAAGCGCGCGTAGGCGGTTTTTTAAGTCTGAT_CCTGTTTGATCCCCACGCTTTCGCACATCAGCGTCAGTTACAGACCAGAACGTCGCCTTCGCCACTGGTG
SILVA_123_SSURef_tax_silva.fasta.gz	Bacteria;Firmicutes;Bacilli;Bacillales;Staphylococcaceae;Staphylococcus
SILVA_123_SSURef_tax_silva_full_align_trunc.fasta.gz	Bacteria;Firmicutes;Bacilli;Bacillales;Staphylococcaceae;Staphylococcus
SILVA_128_SSURef_tax_silva.fasta.gz	Bacteria;Firmicutes;Bacilli;Bacillales;Staphylococcaceae;Staphylococcus
SILVA_128_SSURef_tax_silva_full_align_trunc.fasta.gz	Bacteria;Firmicutes;Bacilli;Bacillales;Staphylococcaceae;Staphylococcus
SILVA_132_SSURef_tax_silva.fasta.gz	Bacteria;Firmicutes;Bacilli;Bacillales;Staphylococcaceae;Staphylococcus
SILVA_132_SSURef_tax_silva_full_align_trunc.fasta.gz	Bacteria;Firmicutes;Bacilli;Bacillales;Staphylococcaceae;Staphylococcus
bac_ssu_r86.1_20180911.fna.gz	Bacteria;Firmicutes;Bacilli;Staphylococcales;Staphylococcaceae;Staphylococcus
23	TACGTAGGTCCCGAGCGTTGTCCGGATTTATTGGGCGTAAAGCGAGCGCAGGCGGTTCTTTAAGTCTGAA_CCTGTTTGCTCCCCACGCTTTCGCGCCTCAGCGTCAGTTACAGACCAGAGAGCCGCCTTCGCCACCGGTG
SILVA_123_SSURef_tax_silva.fasta.gz	Bacteria;Firmicutes;Bacilli;Lactobacillales;Streptococcaceae;Streptococcus
SILVA_123_SSURef_tax_silva_full_align_trunc.fasta.gz	Bacteria;Firmicutes;Bacilli;Lactobacillales;Streptococcaceae;Streptococcus
SILVA_128_SSURef_tax_silva.fasta.gz	Bacteria;Firmicutes;Bacilli;Lactobacillales;Streptococcaceae;Streptococcus
SILVA_128_SSURef_tax_silva_full_align_trunc.fasta.gz	Bacteria;Firmicutes;Bacilli;Lactobacillales;Streptococcaceae;Streptococcus
SILVA_132_SSURef_tax_silva.fasta.gz	Bacteria;Firmicutes;Bacilli;Lactobacillales;Streptococcaceae;Streptococcus
SILVA_132_SSURef_tax_silva_full_align_trunc.fasta.gz	Bacteria;Firmicutes;Bacilli;Lactobacillales;Streptococcaceae;Streptococcus
bac_ssu_r86.1_20180911.fna.gz	Bacteria;Firmicutes;Bacilli;Lactobacillales;Streptococcaceae;Streptococcus
24	TACGTAGGTGGCAAGCGTTGTCCGGATTTATTGGGCGTAAAGCGCGCGCAGGCGGTCTTTTAAGTCTGAT_CCTGTTTGCTCCCCACGCTTTCGAGCCTCAGCGTCAGTTACAGACCAGAGAGTCGCCTTCGCCACTGGTG
SILVA_123_SSURef_tax_silva.fasta.gz	Bacteria;Firmicutes;Bacilli;Bacillales;Listeriaceae;Listeria
SILVA_123_SSURef_tax_silva_full_align_trunc.fasta.gz	Bacteria;Firmicutes;Bacilli;Bacillales;Listeriaceae;Listeria
SILVA_128_SSURef_tax_silva.fasta.gz	Bacteria;Firmicutes;Bacilli;Bacillales;Listeriaceae;Listeria
SILVA_128_SSURef_tax_silva_full_align_trunc.fasta.gz	Bacteria;Firmicutes;Bacilli;Bacillales;Listeriaceae;Listeria
SILVA_132_SSURef_tax_silva.fasta.gz	Bacteria;Firmicutes;Bacilli;Bacillales;Listeriaceae;Listeria
SILVA_132_SSURef_tax_silva_full_align_trunc.fasta.gz	Bacteria;Firmicutes;Bacilli;Bacillales;Listeriaceae;Listeria
bac_ssu_r86.1_20180911.fna.gz	Bacteria;Firmicutes;Bacilli;Lactobacillales;Listeriaceae;Listeria
25	TACGTAGGTGGCAAGCGTTGTCCGGATTTATTGGGCGTAAAGCGAGCGCAGGCGGTTTCTTAAGTCTGAT_CCTGTTTGCTCCCCACGCTTTCGAGCCTCAGCGTCAGTTACAGACCAGAGAGCCGCCTTCGCCACTGGTG
SILVA_123_SSURef_tax_silva.fasta.gz	Bacteria;Firmicutes;Bacilli;Lactobacillales;Enterococcaceae;Enterococcus
SILVA_123_SSURef_tax_silva_full_align_trunc.fasta.gz	Bacteria;Firmicutes;Bacilli;Lactobacillales;Enterococcaceae;Enterococcus
SILVA_128_SSURef_tax_silva.fasta.gz	Bacteria;Firmicutes;Bacilli;Lactobacillales;Enterococcaceae;Enterococcus
SILVA_128_SSURef_tax_silva_full_align_trunc.fasta.gz	Bacteria;Firmicutes;Bacilli;Lactobacillales;Enterococcaceae;Enterococcus
SILVA_132_SSURef_tax_silva.fasta.gz	Bacteria;Firmicutes;Bacilli;Lactobacillales;Enterococcaceae;Enterococcus
SILVA_132_SSURef_tax_silva_full_align_trunc.fasta.gz	Bacteria;Firmicutes;Bacilli;Lactobacillales;Enterococcaceae;Enterococcus
bac_ssu_r86.1_20180911.fna.gz	Bacteria;Firmicutes;Bacilli;Lactobacillales;Enterococcaceae
26	TACGTAGGTGGCAAGCGTTATCCGGAATTATTGGGCGTAAAGCGCGCGCAGGTGGTTTCTTAAGTCTGAT_CCTGTTTGCTCCCCACGCTTTCGCGCCTCAGTGTCAGTTACAGACCAGAAAGTCGCCTTCGCCACTGGTG
SILVA_123_SSURef_tax_silva.fasta.gz	Bacteria;Firmicutes;Bacilli;Bacillales;Bacillaceae;Bacillus
SILVA_123_SSURef_tax_silva_full_align_trunc.fasta.gz	Bacteria;Firmicutes;Bacilli;Bacillales;Bacillaceae;Bacillus
SILVA_128_SSURef_tax_silva.fasta.gz	Bacteria;Firmicutes;Bacilli;Bacillales;Bacillaceae;Bacillus
SILVA_128_SSURef_tax_silva_full_align_trunc.fasta.gz	Bacteria;Firmicutes;Bacilli;Bacillales;Bacillaceae;Bacillus
SILVA_132_SSURef_tax_silva.fasta.gz	Bacteria;Firmicutes;Bacilli;Bacillales;Bacillaceae;Bacillus
SILVA_132_SSURef_tax_silva_full_align_trunc.fasta.gz	Bacteria;Firmicutes;Bacilli;Bacillales;Bacillaceae;Bacillus
bac_ssu_r86.1_20180911.fna.gz	Bacteria;Firmicutes;Bacilli;Bacillales;Bacillaceae_G;Bacillus_A
27	TACGTAGGTGGCAAGCGTTGTCCGGATTTATTGGGCGTAAAGCGAGCGCAGGCGGTTTCTTAAGTCTGAT_CCTGTTTGCTCCCCACGCTTTCGCGCCTCAGCGTCAGTTACAGACCAGAGAGCCGCCTTCGCCACTGGTG
SILVA_123_SSURef_tax_silva.fasta.gz	Bacteria;Firmicutes;Bacilli;Lactobacillales;Enterococcaceae;Enterococcus
SILVA_123_SSURef_tax_silva_full_align_trunc.fasta.gz	Bacteria;Firmicutes;Bacilli;Lactobacillales;Enterococcaceae;Enterococcus
SILVA_128_SSURef_tax_silva.fasta.gz	Bacteria;Firmicutes;Bacilli;Lactobacillales;Enterococcaceae;Enterococcus
SILVA_128_SSURef_tax_silva_full_align_trunc.fasta.gz	Bacteria;Firmicutes;Bacilli;Lactobacillales;Enterococcaceae;Enterococcus
SILVA_132_SSURef_tax_silva.fasta.gz	Bacteria;Firmicutes;Bacilli;Lactobacillales;Enterococcaceae;Enterococcus
SILVA_132_SSURef_tax_silva_full_align_trunc.fasta.gz	Bacteria;Firmicutes;Bacilli;Lactobacillales;Enterococcaceae;Enterococcus
bac_ssu_r86.1_20180911.fna.gz	Bacteria;Firmicutes;Bacilli;Lactobacillales;Enterococcaceae
28	TACGGAGGGTGCAAGCGTTACTCGGAATCACTGGGCGTAAAGAGCGCGTAGGCGGGATAGTCAGTCAGGT_CCTGTTTGCTCCCCACGCTTTCGCGCAATCAGCGTCAGTAATGTTCCAGCAGGTCGCCTTCGCCATGAGT
SILVA_123_SSURef_tax_silva.fasta.gz	Bacteria;Proteobacteria;Epsilonproteobacteria;Campylobacterales;Helicobacteraceae;Helicobacter
SILVA_123_SSURef_tax_silva_full_align_trunc.fasta.gz	Bacteria;Proteobacteria;Epsilonproteobacteria;Campylobacterales;Helicobacteraceae;Helicobacter
SILVA_128_SSURef_tax_silva.fasta.gz	Bacteria;Proteobacteria;Epsilonproteobacteria;Campylobacterales;Helicobacteraceae;Helicobacter
SILVA_128_SSURef_tax_silva_full_align_trunc.fasta.gz	Bacteria;Proteobacteria;Epsilonproteobacteria;Campylobacterales;Helicobacteraceae;Helicobacter
SILVA_132_SSURef_tax_silva.fasta.gz	Bacteria;Epsilonbacteraeota;Campylobacteria;Campylobacterales;Helicobacteraceae;Helicobacter
SILVA_132_SSURef_tax_silva_full_align_trunc.fasta.gz	Bacteria;Epsilonbacteraeota;Campylobacteria;Campylobacterales;Helicobacteraceae;Helicobacter
bac_ssu_r86.1_20180911.fna.gz	Bacteria;Campylobacterota;Campylobacteria;Campylobacterales;Helicobacteraceae;Helicobacter
29	TACGAAGGGTGCAAGCGTTAATCGGAATTACTGGGCGTAAAGCGCGCGTAGGTGGTTCAGCAAGTTGGAT_CCTGTTTGCTCCCCACGCTTTCGCACCTCAGTGTCAGTATCAGTCCAGGTGGTCGCCTTCGCCACTGGTG
SILVA_123_SSURef_tax_silva.fasta.gz	Bacteria;Proteobacteria;Gammaproteobacteria;Pseudomonadales;Pseudomonadaceae;Pseudomonas
SILVA_123_SSURef_tax_silva_full_align_trunc.fasta.gz	Bacteria;Proteobacteria;Gammaproteobacteria;Pseudomonadales;Pseudomonadaceae;Pseudomonas
SILVA_128_SSURef_tax_silva.fasta.gz	Bacteria;Proteobacteria;Gammaproteobacteria;Pseudomonadales;Pseudomonadaceae;Pseudomonas
SILVA_128_SSURef_tax_silva_full_align_trunc.fasta.gz	Bacteria;Proteobacteria;Gammaproteobacteria;Pseudomonadales;Pseudomonadaceae;Pseudomonas
SILVA_132_SSURef_tax_silva.fasta.gz	Bacteria;Proteobacteria;Gammaproteobacteria;Pseudomonadales;Pseudomonadaceae;Pseudomonas
SILVA_132_SSURef_tax_silva_full_align_trunc.fasta.gz	Bacteria;Proteobacteria;Gammaproteobacteria;Pseudomonadales;Pseudomonadaceae;Pseudomonas
bac_ssu_r86.1_20180911.fna.gz	Bacteria;Proteobacteria;Gammaproteobacteria;Pseudomonadales;Pseudomonadaceae
30	TACGTAGGTGGCAAGCGTTATCCGGAATTATTGGGCGTAAAGCGCGCGTAGGCGGTTTTTTAAGTCTGAT_CCTGTTTGCTCCCCACGCTTTCGCACCTCAGCGTCAGTTACAGACCAGAAAGTCGCCTTCGCCACTGGTG
SILVA_123_SSURef_tax_silva.fasta.gz	Bacteria;Firmicutes;Bacilli;Bacillales;Staphylococcaceae;Staphylococcus
SILVA_123_SSURef_tax_silva_full_align_trunc.fasta.gz	Bacteria;Firmicutes;Bacilli;Bacillales;Staphylococcaceae;Staphylococcus
SILVA_128_SSURef_tax_silva.fasta.gz	Bacteria;Firmicutes;Bacilli;Bacillales;Staphylococcaceae;Staphylococcus
SILVA_128_SSURef_tax_silva_full_align_trunc.fasta.gz	Bacteria;Firmicutes;Bacilli;Bacillales;Staphylococcaceae;Staphylococcus
SILVA_132_SSURef_tax_silva.fasta.gz	Bacteria;Firmicutes;Bacilli;Bacillales;Staphylococcaceae;Staphylococcus
SILVA_132_SSURef_tax_silva_full_align_trunc.fasta.gz	Bacteria;Firmicutes;Bacilli;Bacillales;Staphylococcaceae;Staphylococcus
bac_ssu_r86.1_20180911.fna.gz	Bacteria;Firmicutes;Bacilli;Staphylococcales;Staphylococcaceae;Staphylococcus
31	TACGGAGGATCCGAGCGTTATCCGGATTTATTGGGTTTAAAGGGAGCGTAGATGGATGTTTAAGTCAGTT_CCTGTTTGATACCCACACTTTCGCGCCTCAATGTCAGTTGCAGCTTAGCAGGCTGCCTTCGCAATCGGAG
SILVA_123_SSURef_tax_silva.fasta.gz	Bacteria;Bacteroidetes;Bacteroidia;Bacteroidales;Bacteroidaceae;Bacteroides
SILVA_123_SSURef_tax_silva_full_align_trunc.fasta.gz	Bacteria;Bacteroidetes;Bacteroidia;Bacteroidales;Bacteroidaceae;Bacteroides
SILVA_128_SSURef_tax_silva.fasta.gz	Bacteria;Bacteroidetes;Bacteroidia;Bacteroidales;Bacteroidaceae;Bacteroides
SILVA_128_SSURef_tax_silva_full_align_trunc.fasta.gz	Bacteria;Bacteroidetes;Bacteroidia;Bacteroidales;Bacteroidaceae;Bacteroides
SILVA_132_SSURef_tax_silva.fasta.gz	Bacteria;Bacteroidetes;Bacteroidia;Bacteroidales;Bacteroidaceae;Bacteroides
SILVA_132_SSURef_tax_silva_full_align_trunc.fasta.gz	Bacteria;Bacteroidetes;Bacteroidia;Bacteroidales;Bacteroidaceae;Bacteroides
bac_ssu_r86.1_20180911.fna.gz	Bacteria;Bacteroidota
32	TACGTAGGTGGCAAGCGTTGTCCGGATTTACTGGGCGTAAAGGGAGCGTAGGTGGATATTTAAGTGGGAT_CCTGTTTGCTCCCCACGCTTTCGAGCCTCAGTGTCAGTTACAGTCCAGAAAGTCGCCTTCGCCACTGGTA
SILVA_123_SSURef_tax_silva.fasta.gz	Bacteria;Firmicutes;Clostridia;Clostridiales;Clostridiaceae_1;Clostridium_sensu_stricto_1
SILVA_123_SSURef_tax_silva_full_align_trunc.fasta.gz	Bacteria;Firmicutes;Clostridia;Clostridiales;Clostridiaceae_1;Clostridium_sensu_stricto_1
SILVA_128_SSURef_tax_silva.fasta.gz	Bacteria;Firmicutes;Clostridia;Clostridiales;Clostridiaceae_1;Clostridium_sensu_stricto_1
SILVA_128_SSURef_tax_silva_full_align_trunc.fasta.gz	Bacteria;Firmicutes;Clostridia;Clostridiales;Clostridiaceae_1;Clostridium_sensu_stricto_1
SILVA_132_SSURef_tax_silva.fasta.gz	Bacteria;Firmicutes;Clostridia;Clostridiales;Clostridiaceae_1;Clostridium_sensu_stricto_1
SILVA_132_SSURef_tax_silva_full_align_trunc.fasta.gz	Bacteria;Firmicutes;Clostridia;Clostridiales;Clostridiaceae_1;Clostridium_sensu_stricto_1
bac_ssu_r86.1_20180911.fna.gz	Bacteria;Firmicutes_A;Clostridia;Clostridiales;Clostridiaceae;Clostridium
33	TACGTAGGTGGCAAGCGTTGTCCGGATTTACTGGGCGTAAAGGGAGCGTAGGTGGATATTTAAGTGGGAT_CCTGTTTGCTCCCCACGCTTTCGAGCCTCAGTGTCAGTTACAGTCCAGAAAGTCGCCTTCGCCACTGGTC
SILVA_123_SSURef_tax_silva.fasta.gz	Bacteria;Firmicutes;Clostridia;Clostridiales;Clostridiaceae_1;Clostridium_sensu_stricto_1
SILVA_123_SSURef_tax_silva_full_align_trunc.fasta.gz	Bacteria;Firmicutes;Clostridia;Clostridiales;Clostridiaceae_1;Clostridium_sensu_stricto_1
SILVA_128_SSURef_tax_silva.fasta.gz	Bacteria;Firmicutes;Clostridia;Clostridiales;Clostridiaceae_1;Clostridium_sensu_stricto_1
SILVA_128_SSURef_tax_silva_full_align_trunc.fasta.gz	Bacteria;Firmicutes;Clostridia;Clostridiales;Clostridiaceae_1;Clostridium_sensu_stricto_1
SILVA_132_SSURef_tax_silva.fasta.gz	Bacteria;Firmicutes;Clostridia;Clostridiales;Clostridiaceae_1;Clostridium_sensu_stricto_1
SILVA_132_SSURef_tax_silva_full_align_trunc.fasta.gz	Bacteria;Firmicutes;Clostridia;Clostridiales;Clostridiaceae_1;Clostridium_sensu_stricto_1
bac_ssu_r86.1_20180911.fna.gz	Bacteria;Firmicutes_A;Clostridia;Clostridiales;Clostridiaceae;Clostridium
34	TACGTAGGTGGCAAGCGTTGTCCGGATTTATTGGGCGTAAAGCGCGCGTAGGCGGTTTTTTAAGTCTGAT_CCTGTTTGATCCCCACGCTTTCGCACATCAGCGTCAGTTACAGACCAGAAAGTCGCCTTCGCCACTGGTG
SILVA_123_SSURef_tax_silva.fasta.gz	Bacteria;Firmicutes;Bacilli;Bacillales;Staphylococcaceae;Staphylococcus
SILVA_123_SSURef_tax_silva_full_align_trunc.fasta.gz	Bacteria;Firmicutes;Bacilli;Bacillales;Staphylococcaceae;Staphylococcus
SILVA_128_SSURef_tax_silva.fasta.gz	Bacteria;Firmicutes;Bacilli;Bacillales;Staphylococcaceae;Staphylococcus
SILVA_128_SSURef_tax_silva_full_align_trunc.fasta.gz	Bacteria;Firmicutes;Bacilli;Bacillales;Staphylococcaceae;Staphylococcus
SILVA_132_SSURef_tax_silva.fasta.gz	Bacteria;Firmicutes;Bacilli;Bacillales;Staphylococcaceae;Staphylococcus
SILVA_132_SSURef_tax_silva_full_align_trunc.fasta.gz	Bacteria;Firmicutes;Bacilli;Bacillales;Staphylococcaceae;Staphylococcus
bac_ssu_r86.1_20180911.fna.gz	Bacteria;Firmicutes;Bacilli;Staphylococcales;Staphylococcaceae;Staphylococcus
35	TACGTAGGTGGCAAGCGTTGTCCGGATTTACTGGGCGTAAAGGGAGCGTAGGTGGATATTTAAGTGGGAT_CCTGTTTGCTCCCCACGCTTTCGAGCCTCAGCGTCAGTTACAGTCCAGAAAGTCGCCTTCGCCACTGGTA
SILVA_123_SSURef_tax_silva.fasta.gz	Bacteria;Firmicutes;Clostridia;Clostridiales;Clostridiaceae_1;Clostridium_sensu_stricto_1
SILVA_123_SSURef_tax_silva_full_align_trunc.fasta.gz	Bacteria;Firmicutes;Clostridia;Clostridiales;Clostridiaceae_1;Clostridium_sensu_stricto_1
SILVA_128_SSURef_tax_silva.fasta.gz	Bacteria;Firmicutes;Clostridia;Clostridiales;Clostridiaceae_1;Clostridium_sensu_stricto_1
SILVA_128_SSURef_tax_silva_full_align_trunc.fasta.gz	Bacteria;Firmicutes;Clostridia;Clostridiales;Clostridiaceae_1;Clostridium_sensu_stricto_1
SILVA_132_SSURef_tax_silva.fasta.gz	Bacteria;Firmicutes;Clostridia;Clostridiales;Clostridiaceae_1;Clostridium_sensu_stricto_1
SILVA_132_SSURef_tax_silva_full_align_trunc.fasta.gz	Bacteria;Firmicutes;Clostridia;Clostridiales;Clostridiaceae_1;Clostridium_sensu_stricto_1
bac_ssu_r86.1_20180911.fna.gz	Bacteria;Firmicutes_A;Clostridia;Clostridiales;Clostridiaceae;Clostridium
36	TACGTAGGTCCCGAGCGTTGTCCGGATTTATTGGGCGTAAAGGGAGCGCAGGCGGTCAGGAAAGTCTGGA_CCTGTTCGCTACCCACGCTTTCGAGCCTCAGCGTCAGTGACAGACCAGAGAGCCGCTTTCGCCACTGGTG
SILVA_123_SSURef_tax_silva.fasta.gz	Bacteria;Firmicutes;Bacilli;Lactobacillales;Streptococcaceae;Streptococcus
SILVA_123_SSURef_tax_silva_full_align_trunc.fasta.gz	Bacteria;Firmicutes;Bacilli;Lactobacillales;Streptococcaceae;Streptococcus
SILVA_128_SSURef_tax_silva.fasta.gz	Bacteria;Firmicutes;Bacilli;Lactobacillales;Streptococcaceae;Streptococcus
SILVA_128_SSURef_tax_silva_full_align_trunc.fasta.gz	Bacteria;Firmicutes;Bacilli;Lactobacillales;Streptococcaceae;Streptococcus
SILVA_132_SSURef_tax_silva.fasta.gz	Bacteria;Firmicutes;Bacilli;Lactobacillales;Streptococcaceae;Streptococcus
SILVA_132_SSURef_tax_silva_full_align_trunc.fasta.gz	Bacteria;Firmicutes;Bacilli;Lactobacillales;Streptococcaceae;Streptococcus
bac_ssu_r86.1_20180911.fna.gz	Bacteria;Firmicutes;Bacilli;Lactobacillales;Streptococcaceae;Streptococcus
37	TACGGAGGGTGCAAGCGTTACTCGGAATCACTGGGCGTAAAGAGCGCGTAGGCGGGATAGTCAGTCAGGT_CCTGTTTGCTCCCCACGCTTTCGCGCAATCAGCGGCAGTAATGTTCCAGCAGGTCGCCTTCGCAATGAGT
SILVA_123_SSURef_tax_silva.fasta.gz	Bacteria;Proteobacteria;Epsilonproteobacteria;Campylobacterales;Helicobacteraceae;Helicobacter
SILVA_123_SSURef_tax_silva_full_align_trunc.fasta.gz	Bacteria;Proteobacteria;Epsilonproteobacteria;Campylobacterales;Helicobacteraceae;Helicobacter
SILVA_128_SSURef_tax_silva.fasta.gz	Bacteria;Proteobacteria;Epsilonproteobacteria;Campylobacterales;Helicobacteraceae;Helicobacter
SILVA_128_SSURef_tax_silva_full_align_trunc.fasta.gz	Bacteria;Proteobacteria;Epsilonproteobacteria;Campylobacterales;Helicobacteraceae;Helicobacter
SILVA_132_SSURef_tax_silva.fasta.gz	Bacteria;Epsilonbacteraeota;Campylobacteria;Campylobacterales;Helicobacteraceae;Helicobacter
SILVA_132_SSURef_tax_silva_full_align_trunc.fasta.gz	Bacteria;Epsilonbacteraeota;Campylobacteria;Campylobacterales;Helicobacteraceae;Helicobacter
bac_ssu_r86.1_20180911.fna.gz	Bacteria;Campylobacterota;Campylobacteria;Campylobacterales;Helicobacteraceae;Helicobacter
38	TACGTAGGTCCCGAGCGTTGTCCGGATTTATTGGGCGTAAAGCGAGTGCAGGCGGTTCAATAAGTCTGAT_CCTGTTCGCTACCCATGCTTTCGAGCCTCAGCGTCAGTTGCAGACCAGAGAGCCGCCTTCGCCACTGGTG
SILVA_123_SSURef_tax_silva.fasta.gz	Bacteria;Firmicutes;Bacilli;Lactobacillales;Lactobacillaceae;Lactobacillus
SILVA_123_SSURef_tax_silva_full_align_trunc.fasta.gz	Bacteria;Firmicutes;Bacilli;Lactobacillales;Lactobacillaceae;Lactobacillus
SILVA_128_SSURef_tax_silva.fasta.gz	Bacteria;Firmicutes;Bacilli;Lactobacillales;Lactobacillaceae;Lactobacillus
SILVA_128_SSURef_tax_silva_full_align_trunc.fasta.gz	Bacteria;Firmicutes;Bacilli;Lactobacillales;Lactobacillaceae;Lactobacillus
SILVA_132_SSURef_tax_silva.fasta.gz	Bacteria;Firmicutes;Bacilli;Lactobacillales;Lactobacillaceae;Lactobacillus
SILVA_132_SSURef_tax_silva_full_align_trunc.fasta.gz	Bacteria;Firmicutes;Bacilli;Lactobacillales;Lactobacillaceae;Lactobacillus
bac_ssu_r86.1_20180911.fna.gz	Bacteria;Firmicutes;Bacilli;Lactobacillales;Lactobacillaceae;Lactobacillus
39	TACGTAGGGTGCGAGCGTTAATCGGAATTACTGGGCGTAAAGCGGGCGCAGACGGTTACTTAAGCAGGAT_CCTGTTTGCTACCCACGCTTTCGGGCATGAACGTCAGTGTTGTCCCAGGAGGCTGCCTTCGCCATCGGTA
SILVA_123_SSURef_tax_silva.fasta.gz	Bacteria;Proteobacteria;Betaproteobacteria;Neisseriales;Neisseriaceae;Neisseria
SILVA_123_SSURef_tax_silva_full_align_trunc.fasta.gz	Bacteria;Proteobacteria;Betaproteobacteria;Neisseriales;Neisseriaceae;Neisseria
SILVA_128_SSURef_tax_silva.fasta.gz	Bacteria;Proteobacteria;Betaproteobacteria;Neisseriales;Neisseriaceae;Neisseria
SILVA_128_SSURef_tax_silva_full_align_trunc.fasta.gz	Bacteria;Proteobacteria;Betaproteobacteria;Neisseriales;Neisseriaceae;Neisseria
SILVA_132_SSURef_tax_silva.fasta.gz	Bacteria;Proteobacteria;Gammaproteobacteria;Betaproteobacteriales;Neisseriaceae;Neisseria
SILVA_132_SSURef_tax_silva_full_align_trunc.fasta.gz	Bacteria;Proteobacteria;Gammaproteobacteria;Betaproteobacteriales;Neisseriaceae;Neisseria
bac_ssu_r86.1_20180911.fna.gz	Bacteria;Proteobacteria;Gammaproteobacteria;Betaproteobacteriales;Neisseriaceae;Neisseria
40	TACGTAGGGTGCGAGCGTTAATCGGAATTACTGGGCGTAAAGCGGGCGCAGACGGTTACTTAAGCAGGAT_CCTGTTTGCTACCCACGCTTTCGGGCATGAACGTCAGTGTTGTCCCAGGAGGCTGCCTTCGCCATCGGTC
SILVA_123_SSURef_tax_silva.fasta.gz	Bacteria;Proteobacteria;Betaproteobacteria;Neisseriales;Neisseriaceae;Neisseria
SILVA_123_SSURef_tax_silva_full_align_trunc.fasta.gz	Bacteria;Proteobacteria;Betaproteobacteria;Neisseriales;Neisseriaceae;Neisseria
SILVA_128_SSURef_tax_silva.fasta.gz	Bacteria;Proteobacteria;Betaproteobacteria;Neisseriales;Neisseriaceae;Neisseria
SILVA_128_SSURef_tax_silva_full_align_trunc.fasta.gz	Bacteria;Proteobacteria;Betaproteobacteria;Neisseriales;Neisseriaceae;Neisseria
SILVA_132_SSURef_tax_silva.fasta.gz	Bacteria;Proteobacteria;Gammaproteobacteria;Betaproteobacteriales;Neisseriaceae;Neisseria
SILVA_132_SSURef_tax_silva_full_align_trunc.fasta.gz	Bacteria;Proteobacteria;Gammaproteobacteria;Betaproteobacteriales;Neisseriaceae;Neisseria
bac_ssu_r86.1_20180911.fna.gz	Bacteria;Proteobacteria;Gammaproteobacteria;Betaproteobacteriales;Neisseriaceae;Neisseria
41	TACGTAGGGTGCGAGCGTTAATCGGAATTACTGGGCGTAAAGCGGGCGCAGACGGTTACTTAAGCAGGAT_CCTGTTTGCTACCCACGCTTTCGCGCATGAACGTCAGTGTTGTCCCAGGAGGCTGCCTTCGCCATCGGTA
SILVA_123_SSURef_tax_silva.fasta.gz	Bacteria;Proteobacteria;Betaproteobacteria;Neisseriales;Neisseriaceae;Neisseria
SILVA_123_SSURef_tax_silva_full_align_trunc.fasta.gz	Bacteria;Proteobacteria;Betaproteobacteria;Neisseriales;Neisseriaceae;Neisseria
SILVA_128_SSURef_tax_silva.fasta.gz	Bacteria;Proteobacteria;Betaproteobacteria;Neisseriales;Neisseriaceae;Neisseria
SILVA_128_SSURef_tax_silva_full_align_trunc.fasta.gz	Bacteria;Proteobacteria;Betaproteobacteria;Neisseriales;Neisseriaceae;Neisseria
SILVA_132_SSURef_tax_silva.fasta.gz	Bacteria;Proteobacteria;Gammaproteobacteria;Betaproteobacteriales;Neisseriaceae;Neisseria
SILVA_132_SSURef_tax_silva_full_align_trunc.fasta.gz	Bacteria;Proteobacteria;Gammaproteobacteria;Betaproteobacteriales;Neisseriaceae;Neisseria
bac_ssu_r86.1_20180911.fna.gz	Bacteria;Proteobacteria;Gammaproteobacteria;Betaproteobacteriales;Neisseriaceae;Neisseria
42	TACGTAGGTGGCAAGCGTTGTCCGGATTTATTGGGCGTAAAGCGAGTGCAGGCGGTTCAATAAGTCTGAT_CCTGTTCGCTACCCATGCTTTCGAGCCTCAGCGTCAGTTGCAGACCAGAGAGCCGCCTTCGCCACTGGTG
SILVA_123_SSURef_tax_silva.fasta.gz	Bacteria;Firmicutes;Bacilli;Lactobacillales;Lactobacillaceae;Lactobacillus
SILVA_123_SSURef_tax_silva_full_align_trunc.fasta.gz	Bacteria;Firmicutes;Bacilli;Lactobacillales;Lactobacillaceae;Lactobacillus
SILVA_128_SSURef_tax_silva.fasta.gz	Bacteria;Firmicutes;Bacilli;Lactobacillales;Lactobacillaceae;Lactobacillus
SILVA_128_SSURef_tax_silva_full_align_trunc.fasta.gz	Bacteria;Firmicutes;Bacilli;Lactobacillales;Lactobacillaceae;Lactobacillus
SILVA_132_SSURef_tax_silva.fasta.gz	Bacteria;Firmicutes;Bacilli;Lactobacillales;Lactobacillaceae;Lactobacillus
SILVA_132_SSURef_tax_silva_full_align_trunc.fasta.gz	Bacteria;Firmicutes;Bacilli;Lactobacillales;Lactobacillaceae;Lactobacillus
bac_ssu_r86.1_20180911.fna.gz	Bacteria;Firmicutes;Bacilli;Lactobacillales;Lactobacillaceae;Lactobacillus
43	TACGTAGGGTGCGAGCGTTAATCGGATTTACTGGGCGTAAAGCGTGCGTAGGCGGCTTATTAAGTCGGAT_CCTGTTTGCTCCCCATGCTTTCGTACCTCAGCGTCAGTATTAGGCCAGATGGCTGCCTTCGCCATCGGTA
SILVA_123_SSURef_tax_silva.fasta.gz	Bacteria;Proteobacteria;Gammaproteobacteria;Pseudomonadales;Moraxellaceae;Acinetobacter
SILVA_123_SSURef_tax_silva_full_align_trunc.fasta.gz	Bacteria;Proteobacteria;Gammaproteobacteria;Pseudomonadales;Moraxellaceae;Acinetobacter
SILVA_128_SSURef_tax_silva.fasta.gz	Bacteria;Proteobacteria;Gammaproteobacteria;Pseudomonadales;Moraxellaceae;Acinetobacter
SILVA_128_SSURef_tax_silva_full_align_trunc.fasta.gz	Bacteria;Proteobacteria;Gammaproteobacteria;Pseudomonadales;Moraxellaceae;Acinetobacter
SILVA_132_SSURef_tax_silva.fasta.gz	Bacteria;Proteobacteria;Gammaproteobacteria;Pseudomonadales;Moraxellaceae;Acinetobacter
SILVA_132_SSURef_tax_silva_full_align_trunc.fasta.gz	Bacteria;Proteobacteria;Gammaproteobacteria;Pseudomonadales;Moraxellaceae;Acinetobacter
bac_ssu_r86.1_20180911.fna.gz	Bacteria;Proteobacteria;Gammaproteobacteria;Pseudomonadales;Moraxellaceae;Acinetobacter
44	TACGGAGGATCCGAGCGTTATCCGGATTTATTGGGTTTAAAGGGAGCGTAGATGGATGTTTAAGTCAGTT_CCTGTTTGATACCCACACTTTCGAGCCTCAATGTCAGTTGCAGCCTAGCAGGCTGCCTTCGCAATCGGAG
SILVA_123_SSURef_tax_silva.fasta.gz	Bacteria;Bacteroidetes;Bacteroidia;Bacteroidales;Bacteroidaceae;Bacteroides
SILVA_123_SSURef_tax_silva_full_align_trunc.fasta.gz	Bacteria;Bacteroidetes;Bacteroidia;Bacteroidales;Bacteroidaceae;Bacteroides
SILVA_128_SSURef_tax_silva.fasta.gz	Bacteria;Bacteroidetes;Bacteroidia;Bacteroidales;Bacteroidaceae;Bacteroides
SILVA_128_SSURef_tax_silva_full_align_trunc.fasta.gz	Bacteria;Bacteroidetes;Bacteroidia;Bacteroidales;Bacteroidaceae;Bacteroides
SILVA_132_SSURef_tax_silva.fasta.gz	Bacteria;Bacteroidetes;Bacteroidia;Bacteroidales;Bacteroidaceae;Bacteroides
SILVA_132_SSURef_tax_silva_full_align_trunc.fasta.gz	Bacteria;Bacteroidetes;Bacteroidia;Bacteroidales;Bacteroidaceae;Bacteroides
bac_ssu_r86.1_20180911.fna.gz	Bacteria;Bacteroidota
45	TACAGAGGGTGCGAGCGTTAATCGGATTTACTGGGCGTAAAGCGTGCGTAGGCGGCTTATTAAGTCGGAT_CCTGTTTGCTCCCCATGCTTTCGTACCTCAGCGTCAGTATTAGGCCAGATGGCTGCCTTCGCCATCGGTA
SILVA_123_SSURef_tax_silva.fasta.gz	Bacteria;Proteobacteria;Gammaproteobacteria;Pseudomonadales;Moraxellaceae;Acinetobacter
SILVA_123_SSURef_tax_silva_full_align_trunc.fasta.gz	Bacteria;Proteobacteria;Gammaproteobacteria;Pseudomonadales;Moraxellaceae;Acinetobacter
SILVA_128_SSURef_tax_silva.fasta.gz	Bacteria;Proteobacteria;Gammaproteobacteria;Pseudomonadales;Moraxellaceae;Acinetobacter
SILVA_128_SSURef_tax_silva_full_align_trunc.fasta.gz	Bacteria;Proteobacteria;Gammaproteobacteria;Pseudomonadales;Moraxellaceae;Acinetobacter
SILVA_132_SSURef_tax_silva.fasta.gz	Bacteria;Proteobacteria;Gammaproteobacteria;Pseudomonadales;Moraxellaceae;Acinetobacter
SILVA_132_SSURef_tax_silva_full_align_trunc.fasta.gz	Bacteria;Proteobacteria;Gammaproteobacteria;Pseudomonadales;Moraxellaceae;Acinetobacter
bac_ssu_r86.1_20180911.fna.gz	Bacteria;Proteobacteria;Gammaproteobacteria;Pseudomonadales;Moraxellaceae;Acinetobacter
46	TACAGAGGGTGCGAGCGTTAATCGGATTTACTGGGCGTAAAGCGTGCGTAGGCGGCTTATTAAGTCGGAT_CCTGTTTGCTCCCCATGCTTTCGTACCTCAGCGTCAGTATTAGGCCAGATGGCTGCCTTCGCCATCGGTC
SILVA_123_SSURef_tax_silva.fasta.gz	Bacteria;Proteobacteria;Gammaproteobacteria;Pseudomonadales;Moraxellaceae;Acinetobacter
SILVA_123_SSURef_tax_silva_full_align_trunc.fasta.gz	Bacteria;Proteobacteria;Gammaproteobacteria;Pseudomonadales;Moraxellaceae;Acinetobacter
SILVA_128_SSURef_tax_silva.fasta.gz	Bacteria;Proteobacteria;Gammaproteobacteria;Pseudomonadales;Moraxellaceae;Acinetobacter
SILVA_128_SSURef_tax_silva_full_align_trunc.fasta.gz	Bacteria;Proteobacteria;Gammaproteobacteria;Pseudomonadales;Moraxellaceae;Acinetobacter
SILVA_132_SSURef_tax_silva.fasta.gz	Bacteria;Proteobacteria;Gammaproteobacteria;Pseudomonadales;Moraxellaceae;Acinetobacter
SILVA_132_SSURef_tax_silva_full_align_trunc.fasta.gz	Bacteria;Proteobacteria;Gammaproteobacteria;Pseudomonadales;Moraxellaceae;Acinetobacter
bac_ssu_r86.1_20180911.fna.gz	Bacteria;Proteobacteria;Gammaproteobacteria;Pseudomonadales;Moraxellaceae;Acinetobacter
47	TACGGAGGGTGCAAGCGTTACTCGGAATCACTGGGCGTAAAGAGCGCGTAGGCGGGATAGTCAGTCAGGT_CCTGTTTGCTCCCCACGCTTTCGCGCAATCAGCGTCAGTCATGTTCCAGCAGGTCGCCTTCGCAATGAGT
SILVA_123_SSURef_tax_silva.fasta.gz	Bacteria;Proteobacteria;Epsilonproteobacteria;Campylobacterales;Helicobacteraceae;Helicobacter
SILVA_123_SSURef_tax_silva_full_align_trunc.fasta.gz	Bacteria;Proteobacteria;Epsilonproteobacteria;Campylobacterales;Helicobacteraceae;Helicobacter
SILVA_128_SSURef_tax_silva.fasta.gz	Bacteria;Proteobacteria;Epsilonproteobacteria;Campylobacterales;Helicobacteraceae;Helicobacter
SILVA_128_SSURef_tax_silva_full_align_trunc.fasta.gz	Bacteria;Proteobacteria;Epsilonproteobacteria;Campylobacterales;Helicobacteraceae;Helicobacter
SILVA_132_SSURef_tax_silva.fasta.gz	Bacteria;Epsilonbacteraeota;Campylobacteria;Campylobacterales;Helicobacteraceae;Helicobacter
SILVA_132_SSURef_tax_silva_full_align_trunc.fasta.gz	Bacteria;Epsilonbacteraeota;Campylobacteria;Campylobacterales;Helicobacteraceae;Helicobacter
bac_ssu_r86.1_20180911.fna.gz	Bacteria;Campylobacterota;Campylobacteria;Campylobacterales;Helicobacteraceae;Helicobacter
48	TACGTAGGGTGCGAGCGTTAATCGGAATTACTGGGCGTAAAGCGGGCGCAGACGGTTACTTAAGCAGGAT_CCTGTTTGCTACCCACGCTTTCGGGCATGAACGTCAGTGTTGTCCCCGGAGGCTGCCTTCGCCATCGGTA
SILVA_123_SSURef_tax_silva.fasta.gz	Bacteria;Proteobacteria;Betaproteobacteria;Neisseriales;Neisseriaceae;Neisseria
SILVA_123_SSURef_tax_silva_full_align_trunc.fasta.gz	Bacteria;Proteobacteria;Betaproteobacteria;Neisseriales;Neisseriaceae;Neisseria
SILVA_128_SSURef_tax_silva.fasta.gz	Bacteria;Proteobacteria;Betaproteobacteria;Neisseriales;Neisseriaceae;Neisseria
SILVA_128_SSURef_tax_silva_full_align_trunc.fasta.gz	Bacteria;Proteobacteria;Betaproteobacteria;Neisseriales;Neisseriaceae;Neisseria
SILVA_132_SSURef_tax_silva.fasta.gz	Bacteria;Proteobacteria;Gammaproteobacteria;Betaproteobacteriales;Neisseriaceae;Neisseria
SILVA_132_SSURef_tax_silva_full_align_trunc.fasta.gz	Bacteria;Proteobacteria;Gammaproteobacteria;Betaproteobacteriales;Neisseriaceae;Neisseria
bac_ssu_r86.1_20180911.fna.gz	Bacteria;Proteobacteria;Gammaproteobacteria;Betaproteobacteriales;Neisseriaceae;Neisseria
49	TACGTAGGGTGCAAGCGTTACTCGGAATCACTGGGCGTAAAGAGCGCGTAGGCGGGATAGTCAGTCAGGT_CCTGTTTGCTCCCCACGCTTTCGCGCAATCAGCGTCAGTAATGTTCCAGCAGGTCGCCTTCGCAATGAGT
SILVA_123_SSURef_tax_silva.fasta.gz	Bacteria;Proteobacteria;Epsilonproteobacteria;Campylobacterales;Helicobacteraceae;Helicobacter
SILVA_123_SSURef_tax_silva_full_align_trunc.fasta.gz	Bacteria;Proteobacteria;Epsilonproteobacteria;Campylobacterales;Helicobacteraceae;Helicobacter
SILVA_128_SSURef_tax_silva.fasta.gz	Bacteria;Proteobacteria;Epsilonproteobacteria;Campylobacterales;Helicobacteraceae;Helicobacter
SILVA_128_SSURef_tax_silva_full_align_trunc.fasta.gz	Bacteria;Proteobacteria;Epsilonproteobacteria;Campylobacterales;Helicobacteraceae;Helicobacter
SILVA_132_SSURef_tax_silva.fasta.gz	Bacteria;Epsilonbacteraeota;Campylobacteria;Campylobacterales;Helicobacteraceae;Helicobacter
SILVA_132_SSURef_tax_silva_full_align_trunc.fasta.gz	Bacteria;Epsilonbacteraeota;Campylobacteria;Campylobacterales;Helicobacteraceae;Helicobacter
bac_ssu_r86.1_20180911.fna.gz	Bacteria;Campylobacterota;Campylobacteria;Campylobacterales;Helicobacteraceae;Helicobacter
50	TACGTAGGTCCCGAGCGTTGTCCGGATTTATTGGGCGTAAAGGGAGCGCAGGCGGTCAGGAAAGTCTGGA_CCTGTTTGCTCCCCACGCTTTCGAGCCTCAGCGTCAGTGACAGACCAGAGAGCCGCTTTCGCCACTGGTG
SILVA_123_SSURef_tax_silva.fasta.gz	Bacteria;Firmicutes;Bacilli;Lactobacillales;Streptococcaceae;Streptococcus
SILVA_123_SSURef_tax_silva_full_align_trunc.fasta.gz	Bacteria;Firmicutes;Bacilli;Lactobacillales;Streptococcaceae;Streptococcus
SILVA_128_SSURef_tax_silva.fasta.gz	Bacteria;Firmicutes;Bacilli;Lactobacillales;Streptococcaceae;Streptococcus
SILVA_128_SSURef_tax_silva_full_align_trunc.fasta.gz	Bacteria;Firmicutes;Bacilli;Lactobacillales;Streptococcaceae;Streptococcus
SILVA_132_SSURef_tax_silva.fasta.gz	Bacteria;Firmicutes;Bacilli;Lactobacillales;Streptococcaceae;Streptococcus
SILVA_132_SSURef_tax_silva_full_align_trunc.fasta.gz	Bacteria;Firmicutes;Bacilli;Lactobacillales;Streptococcaceae;Streptococcus
bac_ssu_r86.1_20180911.fna.gz	Bacteria;Firmicutes;Bacilli;Lactobacillales;Streptococcaceae;Streptococcus
51	TACGTAGGTGGCAAGCGTTGTCCGGATTTATTGGGCGTAAAGCGAGTGCAGGCGGTTCAATAAGTCTGAT_CCTGTTCGCTACCCACGCTTTCGAGCCTCAGCGTCAGTTGCAGACCAGAGAGCCGCCTTCGCCACTGGTG
SILVA_123_SSURef_tax_silva.fasta.gz	Bacteria;Firmicutes;Bacilli;Lactobacillales;Lactobacillaceae;Lactobacillus
SILVA_123_SSURef_tax_silva_full_align_trunc.fasta.gz	Bacteria;Firmicutes;Bacilli;Lactobacillales;Lactobacillaceae;Lactobacillus
SILVA_128_SSURef_tax_silva.fasta.gz	Bacteria;Firmicutes;Bacilli;Lactobacillales;Lactobacillaceae;Lactobacillus
SILVA_128_SSURef_tax_silva_full_align_trunc.fasta.gz	Bacteria;Firmicutes;Bacilli;Lactobacillales;Lactobacillaceae;Lactobacillus
SILVA_132_SSURef_tax_silva.fasta.gz	Bacteria;Firmicutes;Bacilli;Lactobacillales;Lactobacillaceae;Lactobacillus
SILVA_132_SSURef_tax_silva_full_align_trunc.fasta.gz	Bacteria;Firmicutes;Bacilli;Lactobacillales;Lactobacillaceae;Lactobacillus
bac_ssu_r86.1_20180911.fna.gz	Bacteria;Firmicutes;Bacilli;Lactobacillales;Lactobacillaceae;Lactobacillus
52	TACGTAGGTGGCAAGCGTTATCCGGAATTATTGGGCGTAAAGCGCGCGTAGGCGGTTTTTTAAGTCTGAT_CCTGTTTGCTCCCCACGCTTTCGCGCCTCAGCGTCAGTTACAGACCAGAAAGTCGCCTTCGCCACTGGTG
SILVA_123_SSURef_tax_silva.fasta.gz	Bacteria;Firmicutes;Bacilli;Bacillales;Staphylococcaceae;Staphylococcus
SILVA_123_SSURef_tax_silva_full_align_trunc.fasta.gz	Bacteria;Firmicutes;Bacilli;Bacillales;Staphylococcaceae;Staphylococcus
SILVA_128_SSURef_tax_silva.fasta.gz	Bacteria;Firmicutes;Bacilli;Bacillales;Staphylococcaceae;Staphylococcus
SILVA_128_SSURef_tax_silva_full_align_trunc.fasta.gz	Bacteria;Firmicutes;Bacilli;Bacillales;Staphylococcaceae;Staphylococcus
SILVA_132_SSURef_tax_silva.fasta.gz	Bacteria;Firmicutes;Bacilli;Bacillales;Staphylococcaceae;Staphylococcus
SILVA_132_SSURef_tax_silva_full_align_trunc.fasta.gz	Bacteria;Firmicutes;Bacilli;Bacillales;Staphylococcaceae;Staphylococcus
bac_ssu_r86.1_20180911.fna.gz	Bacteria;Firmicutes;Bacilli
53	TACGTAGGTGGCAAGCGTTATCCGGAATTATTGGGCGTAAAGCGCGCGCAGGTGGTTTCTTAAGTCTGAT_CCTGTTTGCTCCCCACGCTTTCGCGCCTCAGTGTCAGTTACAGACCCGAAAGTCGCCTTCGCCACTGGTG
SILVA_123_SSURef_tax_silva.fasta.gz	Bacteria;Firmicutes;Bacilli;Bacillales;Bacillaceae;Bacillus
SILVA_123_SSURef_tax_silva_full_align_trunc.fasta.gz	Bacteria;Firmicutes;Bacilli;Bacillales;Bacillaceae;Bacillus
SILVA_128_SSURef_tax_silva.fasta.gz	Bacteria;Firmicutes;Bacilli;Bacillales;Bacillaceae;Bacillus
SILVA_128_SSURef_tax_silva_full_align_trunc.fasta.gz	Bacteria;Firmicutes;Bacilli;Bacillales;Bacillaceae;Bacillus
SILVA_132_SSURef_tax_silva.fasta.gz	Bacteria;Firmicutes;Bacilli;Bacillales;Bacillaceae;Bacillus
SILVA_132_SSURef_tax_silva_full_align_trunc.fasta.gz	Bacteria;Firmicutes;Bacilli;Bacillales;Bacillaceae;Bacillus
bac_ssu_r86.1_20180911.fna.gz	Bacteria;Firmicutes;Bacilli;Bacillales;Bacillaceae_G;Bacillus_A
54	TACGGAGGGTGCAAGCGTTACTCGGAATCACTGGGCGTAAAGAGCGCGTAGGCGGGATAGTCAGTCAGGT_CCTGTTTGCTCCCCACGCTTTCGCGCAATCAGCGTCAGTACTGTTCCAGCAGGTCGCCTTCGCAATGAGT
SILVA_123_SSURef_tax_silva.fasta.gz	Bacteria;Proteobacteria;Epsilonproteobacteria;Campylobacterales;Helicobacteraceae;Helicobacter
SILVA_123_SSURef_tax_silva_full_align_trunc.fasta.gz	Bacteria;Proteobacteria;Epsilonproteobacteria;Campylobacterales;Helicobacteraceae;Helicobacter
SILVA_128_SSURef_tax_silva.fasta.gz	Bacteria;Proteobacteria;Epsilonproteobacteria;Campylobacterales;Helicobacteraceae;Helicobacter
SILVA_128_SSURef_tax_silva_full_align_trunc.fasta.gz	Bacteria;Proteobacteria;Epsilonproteobacteria;Campylobacterales;Helicobacteraceae;Helicobacter
SILVA_132_SSURef_tax_silva.fasta.gz	Bacteria;Epsilonbacteraeota;Campylobacteria;Campylobacterales;Helicobacteraceae;Helicobacter
SILVA_132_SSURef_tax_silva_full_align_trunc.fasta.gz	Bacteria;Epsilonbacteraeota;Campylobacteria;Campylobacterales;Helicobacteraceae;Helicobacter
bac_ssu_r86.1_20180911.fna.gz	Bacteria;Campylobacterota;Campylobacteria;Campylobacterales;Helicobacteraceae;Helicobacter
55	TACGGAGGGTGCGAGCGTTAATCGGATTTACTGGGCGTAAAGCGTGCGTAGGCGGCTTATTAAGTCGGAT_CCTGTTTGCTCCCCATGCTTTCGTACCTCAGCGTCAGTATTAGGCCAGATGGCTGCCTTCGCCATCGGTA
SILVA_123_SSURef_tax_silva.fasta.gz	Bacteria;Proteobacteria;Gammaproteobacteria;Pseudomonadales;Moraxellaceae;Acinetobacter
SILVA_123_SSURef_tax_silva_full_align_trunc.fasta.gz	Bacteria;Proteobacteria;Gammaproteobacteria;Pseudomonadales;Moraxellaceae;Acinetobacter
SILVA_128_SSURef_tax_silva.fasta.gz	Bacteria;Proteobacteria;Gammaproteobacteria;Pseudomonadales;Moraxellaceae;Acinetobacter
SILVA_128_SSURef_tax_silva_full_align_trunc.fasta.gz	Bacteria;Proteobacteria;Gammaproteobacteria;Pseudomonadales;Moraxellaceae;Acinetobacter
SILVA_132_SSURef_tax_silva.fasta.gz	Bacteria;Proteobacteria;Gammaproteobacteria;Pseudomonadales;Moraxellaceae;Acinetobacter
SILVA_132_SSURef_tax_silva_full_align_trunc.fasta.gz	Bacteria;Proteobacteria;Gammaproteobacteria;Pseudomonadales;Moraxellaceae;Acinetobacter
bac_ssu_r86.1_20180911.fna.gz	Bacteria;Proteobacteria;Gammaproteobacteria;Pseudomonadales;Moraxellaceae;Acinetobacter
56	TACGTAGGTGGCAAGCGTTATCCGGAATTATTGGGCGTAAAGCGCGCGCAGGTGGTTTCTTAAGTCTGAT_CCTGTTTGCTCCCCACGCTTTCGCGCCTCAGTGTCAGTTACAGACCAGAAAGTCGCCTTCGCCACTGCTG
SILVA_123_SSURef_tax_silva.fasta.gz	Bacteria;Firmicutes;Bacilli;Bacillales;Bacillaceae;Bacillus
SILVA_123_SSURef_tax_silva_full_align_trunc.fasta.gz	Bacteria;Firmicutes;Bacilli;Bacillales;Bacillaceae;Bacillus
SILVA_128_SSURef_tax_silva.fasta.gz	Bacteria;Firmicutes;Bacilli;Bacillales;Bacillaceae;Bacillus
SILVA_128_SSURef_tax_silva_full_align_trunc.fasta.gz	Bacteria;Firmicutes;Bacilli;Bacillales;Bacillaceae;Bacillus
SILVA_132_SSURef_tax_silva.fasta.gz	Bacteria;Firmicutes;Bacilli;Bacillales;Bacillaceae;Bacillus
SILVA_132_SSURef_tax_silva_full_align_trunc.fasta.gz	Bacteria;Firmicutes;Bacilli;Bacillales;Bacillaceae;Bacillus
bac_ssu_r86.1_20180911.fna.gz	Bacteria;Firmicutes;Bacilli;Bacillales;Bacillaceae_G;Bacillus_A
57	TACGTAGGTGGCAAGCGTTATCCGGAATTATTGGGCGTAAAGCGCGCGTAGGCGGTTTTTTAAGTCTGAT_CCTGTTTGCTCCCCACGCTTTCGAGCCTCAGCGTCAGTTACAGACCAGAAAGTCGCCTTCGCCACTGGTG
SILVA_123_SSURef_tax_silva.fasta.gz	Bacteria;Firmicutes;Bacilli;Bacillales;Staphylococcaceae;Staphylococcus
SILVA_123_SSURef_tax_silva_full_align_trunc.fasta.gz	Bacteria;Firmicutes;Bacilli;Bacillales;Staphylococcaceae;Staphylococcus
SILVA_128_SSURef_tax_silva.fasta.gz	Bacteria;Firmicutes;Bacilli;Bacillales;Staphylococcaceae;Staphylococcus
SILVA_128_SSURef_tax_silva_full_align_trunc.fasta.gz	Bacteria;Firmicutes;Bacilli;Bacillales;Staphylococcaceae;Staphylococcus
SILVA_132_SSURef_tax_silva.fasta.gz	Bacteria;Firmicutes;Bacilli;Bacillales;Staphylococcaceae;Staphylococcus
SILVA_132_SSURef_tax_silva_full_align_trunc.fasta.gz	Bacteria;Firmicutes;Bacilli;Bacillales;Staphylococcaceae;Staphylococcus
bac_ssu_r86.1_20180911.fna.gz	Bacteria;Firmicutes;Bacilli
58	TACGTAGGTCCCGAGCGTTGTCCGGATTTATTGGGCGTAAAGCGAGCGCAGGCGGTTCTTTAAGTCTGAA_CCTGTTTGCTCCCCACGCTTTCGAGCCTCAGCGTCAGTTACAGACCAGAGAGCCGCTTTCGCCACCGGTG
SILVA_123_SSURef_tax_silva.fasta.gz	Bacteria;Firmicutes;Bacilli;Lactobacillales;Streptococcaceae;Streptococcus
SILVA_123_SSURef_tax_silva_full_align_trunc.fasta.gz	Bacteria;Firmicutes;Bacilli;Lactobacillales;Streptococcaceae;Streptococcus
SILVA_128_SSURef_tax_silva.fasta.gz	Bacteria;Firmicutes;Bacilli;Lactobacillales;Streptococcaceae;Streptococcus
SILVA_128_SSURef_tax_silva_full_align_trunc.fasta.gz	Bacteria;Firmicutes;Bacilli;Lactobacillales;Streptococcaceae;Streptococcus
SILVA_132_SSURef_tax_silva.fasta.gz	Bacteria;Firmicutes;Bacilli;Lactobacillales;Streptococcaceae;Streptococcus
SILVA_132_SSURef_tax_silva_full_align_trunc.fasta.gz	Bacteria;Firmicutes;Bacilli;Lactobacillales;Streptococcaceae;Streptococcus
bac_ssu_r86.1_20180911.fna.gz	Bacteria;Firmicutes;Bacilli;Lactobacillales;Streptococcaceae;Streptococcus
59	TACGTAGGTCCCGAGCGTTGTCCGGATTTATTGGGCGTAAAGCGAGCGCAGGCGGTTCTTTAAGTCTGAA_CCTGTTTGCTCCCCACGCTTTCGAGCCTCAGCGTCAGTTACAGACCCGAGAGCCGCTTTCGCCACCGGTG
SILVA_123_SSURef_tax_silva.fasta.gz	Bacteria;Firmicutes;Bacilli;Lactobacillales;Streptococcaceae;Streptococcus
SILVA_123_SSURef_tax_silva_full_align_trunc.fasta.gz	Bacteria;Firmicutes;Bacilli;Lactobacillales;Streptococcaceae;Streptococcus
SILVA_128_SSURef_tax_silva.fasta.gz	Bacteria;Firmicutes;Bacilli;Lactobacillales;Streptococcaceae;Streptococcus
SILVA_128_SSURef_tax_silva_full_align_trunc.fasta.gz	Bacteria;Firmicutes;Bacilli;Lactobacillales;Streptococcaceae;Streptococcus
SILVA_132_SSURef_tax_silva.fasta.gz	Bacteria;Firmicutes;Bacilli;Lactobacillales;Streptococcaceae;Streptococcus
SILVA_132_SSURef_tax_silva_full_align_trunc.fasta.gz	Bacteria;Firmicutes;Bacilli;Lactobacillales;Streptococcaceae;Streptococcus
bac_ssu_r86.1_20180911.fna.gz	Bacteria;Firmicutes;Bacilli;Lactobacillales;Streptococcaceae;Streptococcus
60	TACGTAGGTGGCAAGCGTTATCCGGAATTATTGGGCGTAAAGCGCGCGCAGGCGGTTTTTTAAGTCTGAT_CCTGTTTGATCCCCACGCTTTCGCACATCAGCGTCAGTTACAGACCAGAAAGTCGCCTTCGCCACTGGTG
SILVA_123_SSURef_tax_silva.fasta.gz	Bacteria;Firmicutes;Bacilli;Bacillales;Staphylococcaceae;Staphylococcus
SILVA_123_SSURef_tax_silva_full_align_trunc.fasta.gz	Bacteria;Firmicutes;Bacilli;Bacillales;Staphylococcaceae;Staphylococcus
SILVA_128_SSURef_tax_silva.fasta.gz	Bacteria;Firmicutes;Bacilli;Bacillales;Staphylococcaceae;Staphylococcus
SILVA_128_SSURef_tax_silva_full_align_trunc.fasta.gz	Bacteria;Firmicutes;Bacilli;Bacillales;Staphylococcaceae;Staphylococcus
SILVA_132_SSURef_tax_silva.fasta.gz	Bacteria;Firmicutes;Bacilli;Bacillales;Staphylococcaceae;Staphylococcus
SILVA_132_SSURef_tax_silva_full_align_trunc.fasta.gz	Bacteria;Firmicutes;Bacilli;Bacillales;Staphylococcaceae;Staphylococcus
bac_ssu_r86.1_20180911.fna.gz	Bacteria;Firmicutes;Bacilli;Staphylococcales;Staphylococcaceae;Staphylococcus
61	TACGTAGGTGGCAAGCGTTGTCCGGATTTACTGGGCGTAAAGGGAGCGTAGGTGGATATTTAAGTGGGAT_CCTGTTTGATCCCCACGCTTTCGCACATCAGCGTCAGTTACAGACCAGAAAGTCGCCTTCGCCACTGGTA
SILVA_123_SSURef_tax_silva.fasta.gz	Bacteria;Firmicutes;Clostridia;Clostridiales;Clostridiaceae_1;Clostridium_sensu_stricto_1
SILVA_123_SSURef_tax_silva_full_align_trunc.fasta.gz	Bacteria;Firmicutes;Clostridia;Clostridiales;Clostridiaceae_1;Clostridium_sensu_stricto_1
SILVA_128_SSURef_tax_silva.fasta.gz	Bacteria;Firmicutes;Clostridia;Clostridiales;Clostridiaceae_1;Clostridium_sensu_stricto_1
SILVA_128_SSURef_tax_silva_full_align_trunc.fasta.gz	Bacteria;Firmicutes;Clostridia;Clostridiales;Clostridiaceae_1;Clostridium_sensu_stricto_1
SILVA_132_SSURef_tax_silva.fasta.gz	Bacteria;Firmicutes;Clostridia;Clostridiales;Clostridiaceae_1;Clostridium_sensu_stricto_1
SILVA_132_SSURef_tax_silva_full_align_trunc.fasta.gz	Bacteria;Firmicutes;Clostridia;Clostridiales;Clostridiaceae_1;Clostridium_sensu_stricto_1
bac_ssu_r86.1_20180911.fna.gz	Bacteria;Firmicutes_A;Clostridia;Clostridiales;Clostridiaceae;Clostridium
62	TACGGAGGGTGCAAGCGTTACTCGGAATCACTGGGCGTAAAGAGCGCGTAGGCGGGATAGTCAGTCAGGT_CCTGTTTGCTCCCCACGCTTTCGCGCAATCAGCGGCAGTAATGTTCCAGCAGGTCGCCTCCGCAATGAGT
SILVA_123_SSURef_tax_silva.fasta.gz	Bacteria;Proteobacteria;Epsilonproteobacteria;Campylobacterales;Helicobacteraceae;Helicobacter
SILVA_123_SSURef_tax_silva_full_align_trunc.fasta.gz	Bacteria;Proteobacteria;Epsilonproteobacteria;Campylobacterales;Helicobacteraceae;Helicobacter
SILVA_128_SSURef_tax_silva.fasta.gz	Bacteria;Proteobacteria;Epsilonproteobacteria;Campylobacterales;Helicobacteraceae;Helicobacter
SILVA_128_SSURef_tax_silva_full_align_trunc.fasta.gz	Bacteria;Proteobacteria;Epsilonproteobacteria;Campylobacterales;Helicobacteraceae;Helicobacter
SILVA_132_SSURef_tax_silva.fasta.gz	Bacteria;Epsilonbacteraeota;Campylobacteria;Campylobacterales;Helicobacteraceae;Helicobacter
SILVA_132_SSURef_tax_silva_full_align_trunc.fasta.gz	Bacteria;Epsilonbacteraeota;Campylobacteria;Campylobacterales;Helicobacteraceae;Helicobacter
bac_ssu_r86.1_20180911.fna.gz	Bacteria;Campylobacterota;Campylobacteria;Campylobacterales;Helicobacteraceae;Helicobacter
63	TACGTAGGTGGCAAGCGTTGTCCGGATTTATTGGGCGTAAAGCGAGTGCAGGCGGTTCAATAAGTCTGAT_CCTGTTCGCTACCCATGCTTTCGCGCCTCAGCGTCAGTTGCAGACCAGAGAGCCGCCTTCGCCACTGGTG
SILVA_123_SSURef_tax_silva.fasta.gz	Bacteria;Firmicutes;Bacilli;Lactobacillales;Lactobacillaceae;Lactobacillus
SILVA_123_SSURef_tax_silva_full_align_trunc.fasta.gz	Bacteria;Firmicutes;Bacilli;Lactobacillales;Lactobacillaceae;Lactobacillus
SILVA_128_SSURef_tax_silva.fasta.gz	Bacteria;Firmicutes;Bacilli;Lactobacillales;Lactobacillaceae;Lactobacillus
SILVA_128_SSURef_tax_silva_full_align_trunc.fasta.gz	Bacteria;Firmicutes;Bacilli;Lactobacillales;Lactobacillaceae;Lactobacillus
SILVA_132_SSURef_tax_silva.fasta.gz	Bacteria;Firmicutes;Bacilli;Lactobacillales;Lactobacillaceae;Lactobacillus
SILVA_132_SSURef_tax_silva_full_align_trunc.fasta.gz	Bacteria;Firmicutes;Bacilli;Lactobacillales;Lactobacillaceae;Lactobacillus
bac_ssu_r86.1_20180911.fna.gz	Bacteria;Firmicutes;Bacilli;Lactobacillales;Lactobacillaceae;Lactobacillus
64	TACGGAGGGTGCAAGCGTTACTCGGAATCACTGGGCGTAAAGAGCGCGTAGGCGGGATAGTCAGTCAGGT_CCTGTTTGCTCCCCACGCTTTCGCGCCATCAGCGTCAGTAATGTTCCAGCAGGTCGCCTTCGCAATGAGT
SILVA_123_SSURef_tax_silva.fasta.gz	Bacteria;Proteobacteria;Epsilonproteobacteria;Campylobacterales;Helicobacteraceae;Helicobacter
SILVA_123_SSURef_tax_silva_full_align_trunc.fasta.gz	Bacteria;Proteobacteria;Epsilonproteobacteria;Campylobacterales;Helicobacteraceae;Helicobacter
SILVA_128_SSURef_tax_silva.fasta.gz	Bacteria;Proteobacteria;Epsilonproteobacteria;Campylobacterales;Helicobacteraceae;Helicobacter
SILVA_128_SSURef_tax_silva_full_align_trunc.fasta.gz	Bacteria;Proteobacteria;Epsilonproteobacteria;Campylobacterales;Helicobacteraceae;Helicobacter
SILVA_132_SSURef_tax_silva.fasta.gz	Bacteria;Epsilonbacteraeota;Campylobacteria;Campylobacterales;Helicobacteraceae;Helicobacter
SILVA_132_SSURef_tax_silva_full_align_trunc.fasta.gz	Bacteria;Epsilonbacteraeota;Campylobacteria;Campylobacterales;Helicobacteraceae;Helicobacter
bac_ssu_r86.1_20180911.fna.gz	Bacteria;Campylobacterota;Campylobacteria;Campylobacterales;Helicobacteraceae;Helicobacter
65	TACGGAGGATCCGAGCGTTATCCGGATTTATTGGGTTTAAAGGGAGCGTAGATGGATATTTAAGTCAGTT_CCTGTTTGATACCCACACTTTCGAGCCTCAATGTCAGTTGCAGCTTAGCAGGCTGCCTTCGCAATCGGAG
SILVA_123_SSURef_tax_silva.fasta.gz	Bacteria;Bacteroidetes;Bacteroidia;Bacteroidales;Bacteroidaceae;Bacteroides
SILVA_123_SSURef_tax_silva_full_align_trunc.fasta.gz	Bacteria;Bacteroidetes;Bacteroidia;Bacteroidales;Bacteroidaceae;Bacteroides
SILVA_128_SSURef_tax_silva.fasta.gz	Bacteria;Bacteroidetes;Bacteroidia;Bacteroidales;Bacteroidaceae;Bacteroides
SILVA_128_SSURef_tax_silva_full_align_trunc.fasta.gz	Bacteria;Bacteroidetes;Bacteroidia;Bacteroidales;Bacteroidaceae;Bacteroides
SILVA_132_SSURef_tax_silva.fasta.gz	Bacteria;Bacteroidetes;Bacteroidia;Bacteroidales;Bacteroidaceae;Bacteroides
SILVA_132_SSURef_tax_silva_full_align_trunc.fasta.gz	Bacteria;Bacteroidetes;Bacteroidia;Bacteroidales;Bacteroidaceae;Bacteroides
bac_ssu_r86.1_20180911.fna.gz	Bacteria;Bacteroidota
66	TACGTAGGTGGCAAGCGTTGTCCGGATTTATTGGGCGTAAAGCGCGCGCAGGCGGTCTTTTAAGTCTGAT_CCTGTTTGCTCCCCACGCTTTCGCGCCTCAGCGTCAGTTACAGACCAGAGAGTCGCCTTCGCCACTGGTG
SILVA_123_SSURef_tax_silva.fasta.gz	Bacteria;Firmicutes;Bacilli;Bacillales;Listeriaceae;Listeria
SILVA_123_SSURef_tax_silva_full_align_trunc.fasta.gz	Bacteria;Firmicutes;Bacilli;Bacillales;Listeriaceae;Listeria
SILVA_128_SSURef_tax_silva.fasta.gz	Bacteria;Firmicutes;Bacilli;Bacillales;Listeriaceae;Listeria
SILVA_128_SSURef_tax_silva_full_align_trunc.fasta.gz	Bacteria;Firmicutes;Bacilli;Bacillales;Listeriaceae;Listeria
SILVA_132_SSURef_tax_silva.fasta.gz	Bacteria;Firmicutes;Bacilli;Bacillales;Listeriaceae;Listeria
SILVA_132_SSURef_tax_silva_full_align_trunc.fasta.gz	Bacteria;Firmicutes;Bacilli;Bacillales;Listeriaceae;Listeria
bac_ssu_r86.1_20180911.fna.gz	Bacteria;Firmicutes;Bacilli;Lactobacillales;Listeriaceae;Listeria
67	TACGGAGGATCCGAGCGTTATCCGGATTTATTGGGTTTAAAGGGAGCGTAGATGGATGTTTAAGTCAGTT_CCTGTTTGATACCCACACTTTCGAGCCTCAATGTCAGTTGCAGCCCAGCAGGCTGCCTTCGCAATCGGAG
SILVA_123_SSURef_tax_silva.fasta.gz	Bacteria;Bacteroidetes;Bacteroidia;Bacteroidales;Bacteroidaceae;Bacteroides
SILVA_123_SSURef_tax_silva_full_align_trunc.fasta.gz	Bacteria;Bacteroidetes;Bacteroidia;Bacteroidales;Bacteroidaceae;Bacteroides
SILVA_128_SSURef_tax_silva.fasta.gz	Bacteria;Bacteroidetes;Bacteroidia;Bacteroidales;Bacteroidaceae;Bacteroides
SILVA_128_SSURef_tax_silva_full_align_trunc.fasta.gz	Bacteria;Bacteroidetes;Bacteroidia;Bacteroidales;Bacteroidaceae;Bacteroides
SILVA_132_SSURef_tax_silva.fasta.gz	Bacteria;Bacteroidetes;Bacteroidia;Bacteroidales;Bacteroidaceae;Bacteroides
SILVA_132_SSURef_tax_silva_full_align_trunc.fasta.gz	Bacteria;Bacteroidetes;Bacteroidia;Bacteroidales;Bacteroidaceae;Bacteroides
bac_ssu_r86.1_20180911.fna.gz	Bacteria;Bacteroidota
68	TACGTAGGTGGCAAGCGTTGTCCGGATTTATTGGGCGTAAAGCGCGCGCAGGCGGTCTTTTAAGTCTGAT_CCTGTTTGCTCCCCACGCTTTCGCGCCTCAGCGTCAGTTACAGACCAGAGAGTCGCCTTCGCCACTGCTG
SILVA_123_SSURef_tax_silva.fasta.gz	Bacteria;Firmicutes;Bacilli;Bacillales;Listeriaceae;Listeria
SILVA_123_SSURef_tax_silva_full_align_trunc.fasta.gz	Bacteria;Firmicutes;Bacilli;Bacillales;Listeriaceae;Listeria
SILVA_128_SSURef_tax_silva.fasta.gz	Bacteria;Firmicutes;Bacilli;Bacillales;Listeriaceae;Listeria
SILVA_128_SSURef_tax_silva_full_align_trunc.fasta.gz	Bacteria;Firmicutes;Bacilli;Bacillales;Listeriaceae;Listeria
SILVA_132_SSURef_tax_silva.fasta.gz	Bacteria;Firmicutes;Bacilli;Bacillales;Listeriaceae;Listeria
SILVA_132_SSURef_tax_silva_full_align_trunc.fasta.gz	Bacteria;Firmicutes;Bacilli;Bacillales;Listeriaceae;Listeria
bac_ssu_r86.1_20180911.fna.gz	Bacteria;Firmicutes;Bacilli;Lactobacillales;Listeriaceae;Listeria
69	TACGTAGGTCCCGAGCGTTGTCCGGATTTATTGGGCGTAAAGCGAGCGCAGGCGGTTCTTTAAGTCTGAA_CCTGTTTGCTCCCCACGCTTTCGCGCCTCAGCGTCAGTTACAGACCAGAGAGCCGCTTTCGCCACCGGTG
SILVA_123_SSURef_tax_silva.fasta.gz	Bacteria;Firmicutes;Bacilli;Lactobacillales;Streptococcaceae;Streptococcus
SILVA_123_SSURef_tax_silva_full_align_trunc.fasta.gz	Bacteria;Firmicutes;Bacilli;Lactobacillales;Streptococcaceae;Streptococcus
SILVA_128_SSURef_tax_silva.fasta.gz	Bacteria;Firmicutes;Bacilli;Lactobacillales;Streptococcaceae;Streptococcus
SILVA_128_SSURef_tax_silva_full_align_trunc.fasta.gz	Bacteria;Firmicutes;Bacilli;Lactobacillales;Streptococcaceae;Streptococcus
SILVA_132_SSURef_tax_silva.fasta.gz	Bacteria;Firmicutes;Bacilli;Lactobacillales;Streptococcaceae;Streptococcus
SILVA_132_SSURef_tax_silva_full_align_trunc.fasta.gz	Bacteria;Firmicutes;Bacilli;Lactobacillales;Streptococcaceae;Streptococcus
bac_ssu_r86.1_20180911.fna.gz	Bacteria;Firmicutes;Bacilli;Lactobacillales;Streptococcaceae;Streptococcus
70	TACGGAGGGTGCAAGCGTTACTCGGAATCACTGGGCGTAAAGAGCGCGTAGGCGGGATAGTCAGTCAGGT_CCTGTTTGCTCCCCACGCTTTCGCGCAATCAGCGTCAGTAATGTTCCAGCAGGTCGCCTCCGCAATGAGT
SILVA_123_SSURef_tax_silva.fasta.gz	Bacteria;Proteobacteria;Epsilonproteobacteria;Campylobacterales;Helicobacteraceae;Helicobacter
SILVA_123_SSURef_tax_silva_full_align_trunc.fasta.gz	Bacteria;Proteobacteria;Epsilonproteobacteria;Campylobacterales;Helicobacteraceae;Helicobacter
SILVA_128_SSURef_tax_silva.fasta.gz	Bacteria;Proteobacteria;Epsilonproteobacteria;Campylobacterales;Helicobacteraceae;Helicobacter
SILVA_128_SSURef_tax_silva_full_align_trunc.fasta.gz	Bacteria;Proteobacteria;Epsilonproteobacteria;Campylobacterales;Helicobacteraceae;Helicobacter
SILVA_132_SSURef_tax_silva.fasta.gz	Bacteria;Epsilonbacteraeota;Campylobacteria;Campylobacterales;Helicobacteraceae;Helicobacter
SILVA_132_SSURef_tax_silva_full_align_trunc.fasta.gz	Bacteria;Epsilonbacteraeota;Campylobacteria;Campylobacterales;Helicobacteraceae;Helicobacter
bac_ssu_r86.1_20180911.fna.gz	Bacteria;Campylobacterota;Campylobacteria;Campylobacterales;Helicobacteraceae;Helicobacter
71	TACGTAGGTGGCAAGCGTTGTCCGGATTTACTGGGCGTAAAGGGAGCGTAGGTGGATATTTAAGTGGGAT_CCTGTTTGCTCCCCACGCTTTCGCGCCTCAGTGTCAGTTACAGTCCAGAAAGTCGCCTTCGCCACTGGTA
SILVA_123_SSURef_tax_silva.fasta.gz	Bacteria;Firmicutes;Clostridia;Clostridiales;Clostridiaceae_1;Clostridium_sensu_stricto_1
SILVA_123_SSURef_tax_silva_full_align_trunc.fasta.gz	Bacteria;Firmicutes;Clostridia;Clostridiales;Clostridiaceae_1;Clostridium_sensu_stricto_1
SILVA_128_SSURef_tax_silva.fasta.gz	Bacteria;Firmicutes;Clostridia;Clostridiales;Clostridiaceae_1;Clostridium_sensu_stricto_1
SILVA_128_SSURef_tax_silva_full_align_trunc.fasta.gz	Bacteria;Firmicutes;Clostridia;Clostridiales;Clostridiaceae_1;Clostridium_sensu_stricto_1
SILVA_132_SSURef_tax_silva.fasta.gz	Bacteria;Firmicutes;Clostridia;Clostridiales;Clostridiaceae_1;Clostridium_sensu_stricto_1
SILVA_132_SSURef_tax_silva_full_align_trunc.fasta.gz	Bacteria;Firmicutes;Clostridia;Clostridiales;Clostridiaceae_1;Clostridium_sensu_stricto_1
bac_ssu_r86.1_20180911.fna.gz	Bacteria;Firmicutes_A;Clostridia;Clostridiales;Clostridiaceae;Clostridium
72	TACGTAGGTGGCAAGCGTTGTCCGGATTTATTGGGCGTAAAGCGCGCGCAGGCGGTCTTTTAAGTCTGAT_CCTGTTTGCTCCCCACGCTTTCGCGCCTCAGCGTCAGTTACAGACCCGAGAGTCGCCTTCGCCACTGGTG
SILVA_123_SSURef_tax_silva.fasta.gz	Bacteria;Firmicutes;Bacilli;Bacillales;Listeriaceae;Listeria
SILVA_123_SSURef_tax_silva_full_align_trunc.fasta.gz	Bacteria;Firmicutes;Bacilli;Bacillales;Listeriaceae;Listeria
SILVA_128_SSURef_tax_silva.fasta.gz	Bacteria;Firmicutes;Bacilli;Bacillales;Listeriaceae;Listeria
SILVA_128_SSURef_tax_silva_full_align_trunc.fasta.gz	Bacteria;Firmicutes;Bacilli;Bacillales;Listeriaceae;Listeria
SILVA_132_SSURef_tax_silva.fasta.gz	Bacteria;Firmicutes;Bacilli;Bacillales;Listeriaceae;Listeria
SILVA_132_SSURef_tax_silva_full_align_trunc.fasta.gz	Bacteria;Firmicutes;Bacilli;Bacillales;Listeriaceae;Listeria
bac_ssu_r86.1_20180911.fna.gz	Bacteria;Firmicutes;Bacilli;Lactobacillales;Listeriaceae;Listeria
73	TACAGAGGGTGCGAGCGTTAATCGGATTTACTGGGCGTAAAGCGTGCGTAGGCGGCTTATTAAGTCGGAT_CCTGTTTGCTCCCCATGCTTTCGTACCTCAGCGTCAGTATTAGGCCAGATGGCTGCCTTCGCCATCGTTA
SILVA_123_SSURef_tax_silva.fasta.gz	Bacteria;Proteobacteria;Gammaproteobacteria;Pseudomonadales;Moraxellaceae;Acinetobacter
SILVA_123_SSURef_tax_silva_full_align_trunc.fasta.gz	Bacteria;Proteobacteria;Gammaproteobacteria;Pseudomonadales;Moraxellaceae;Acinetobacter
SILVA_128_SSURef_tax_silva.fasta.gz	Bacteria;Proteobacteria;Gammaproteobacteria;Pseudomonadales;Moraxellaceae;Acinetobacter
SILVA_128_SSURef_tax_silva_full_align_trunc.fasta.gz	Bacteria;Proteobacteria;Gammaproteobacteria;Pseudomonadales;Moraxellaceae;Acinetobacter
SILVA_132_SSURef_tax_silva.fasta.gz	Bacteria;Proteobacteria;Gammaproteobacteria;Pseudomonadales;Moraxellaceae;Acinetobacter
SILVA_132_SSURef_tax_silva_full_align_trunc.fasta.gz	Bacteria;Proteobacteria;Gammaproteobacteria;Pseudomonadales;Moraxellaceae;Acinetobacter
bac_ssu_r86.1_20180911.fna.gz	Bacteria;Proteobacteria;Gammaproteobacteria;Pseudomonadales;Moraxellaceae;Acinetobacter
74	TACGGAGGATCCGAGCGTTATCCGGATTTATTGGGTTTAAAGGGAGCGTAGATGGATGTTTAAGTCAGTT_CCTGTTTGATACCCACACTTTCGAGCCTCAATGTCAGTTGCAGCTTAGCAGGCTGCCTTCGCAATCGGAG
SILVA_123_SSURef_tax_silva.fasta.gz	Bacteria;Bacteroidetes;Bacteroidia;Bacteroidales;Bacteroidaceae;Bacteroides
SILVA_123_SSURef_tax_silva_full_align_trunc.fasta.gz	Bacteria;Bacteroidetes;Bacteroidia;Bacteroidales;Bacteroidaceae;Bacteroides
SILVA_128_SSURef_tax_silva.fasta.gz	Bacteria;Bacteroidetes;Bacteroidia;Bacteroidales;Bacteroidaceae;Bacteroides
SILVA_128_SSURef_tax_silva_full_align_trunc.fasta.gz	Bacteria;Bacteroidetes;Bacteroidia;Bacteroidales;Bacteroidaceae;Bacteroides
SILVA_132_SSURef_tax_silva.fasta.gz	Bacteria;Bacteroidetes;Bacteroidia;Bacteroidales;Bacteroidaceae;Bacteroides
SILVA_132_SSURef_tax_silva_full_align_trunc.fasta.gz	Bacteria;Bacteroidetes;Bacteroidia;Bacteroidales;Bacteroidaceae;Bacteroides
bac_ssu_r86.1_20180911.fna.gz	Bacteria;Bacteroidota
75	TACGTAGGTCCCGAGCGTTGTCCGGATTTATTGGGCGTAAAGCGCGCGCAGGCGGTCTTTTAAGTCTGAT_CCTGTTTGCTCCCCACGCTTTCGCGCCTCAGCGTCAGTTACAGACCAGAGAGTCGCCTTCGCCACTGGTG
SILVA_123_SSURef_tax_silva.fasta.gz	Bacteria;Firmicutes;Bacilli;Bacillales;Listeriaceae;Listeria
SILVA_123_SSURef_tax_silva_full_align_trunc.fasta.gz	Bacteria;Firmicutes;Bacilli;Bacillales;Listeriaceae;Listeria
SILVA_128_SSURef_tax_silva.fasta.gz	Bacteria;Firmicutes;Bacilli;Bacillales;Listeriaceae;Listeria
SILVA_128_SSURef_tax_silva_full_align_trunc.fasta.gz	Bacteria;Firmicutes;Bacilli;Bacillales;Listeriaceae;Listeria
SILVA_132_SSURef_tax_silva.fasta.gz	Bacteria;Firmicutes;Bacilli;Bacillales;Listeriaceae;Listeria
SILVA_132_SSURef_tax_silva_full_align_trunc.fasta.gz	Bacteria;Firmicutes;Bacilli;Bacillales;Listeriaceae;Listeria
bac_ssu_r86.1_20180911.fna.gz	Bacteria;Firmicutes;Bacilli;Lactobacillales;Listeriaceae;Listeria
76	TACGTAGGTCCCGAGCGTTGTCCGGATTTATTGGGCGTAAAGGGAGCGCAGGCGGTCAGGAAAGTCTGGA_CCTGTTCGCTACCCACGCTTTCGCGCCTCAGCGTCAGTGACAGACCAGAGAGCCGCTTTCGCCACTGGTG
SILVA_123_SSURef_tax_silva.fasta.gz	Bacteria;Firmicutes;Bacilli;Lactobacillales;Streptococcaceae;Streptococcus
SILVA_123_SSURef_tax_silva_full_align_trunc.fasta.gz	Bacteria;Firmicutes;Bacilli;Lactobacillales;Streptococcaceae;Streptococcus
SILVA_128_SSURef_tax_silva.fasta.gz	Bacteria;Firmicutes;Bacilli;Lactobacillales;Streptococcaceae;Streptococcus
SILVA_128_SSURef_tax_silva_full_align_trunc.fasta.gz	Bacteria;Firmicutes;Bacilli;Lactobacillales;Streptococcaceae;Streptococcus
SILVA_132_SSURef_tax_silva.fasta.gz	Bacteria;Firmicutes;Bacilli;Lactobacillales;Streptococcaceae;Streptococcus
SILVA_132_SSURef_tax_silva_full_align_trunc.fasta.gz	Bacteria;Firmicutes;Bacilli;Lactobacillales;Streptococcaceae;Streptococcus
bac_ssu_r86.1_20180911.fna.gz	Bacteria;Firmicutes;Bacilli;Lactobacillales;Streptococcaceae;Streptococcus
77	TACGTAGGTGGCAAGCGTTATCCGGAATTATTGGGCGTAAAGCGCGCGCAGGTGGTTTCTTAAGTCTGAT_CCTGTTTGCTCCCCACGCTTTCGCGCCTCAGCGTCAGTTACAGACCAGAAAGTCGCCTTCGCCACTGGTG
SILVA_123_SSURef_tax_silva.fasta.gz	Bacteria;Firmicutes;Bacilli;Bacillales;Bacillaceae;Bacillus
SILVA_123_SSURef_tax_silva_full_align_trunc.fasta.gz	Bacteria;Firmicutes;Bacilli;Bacillales;Bacillaceae;Bacillus
SILVA_128_SSURef_tax_silva.fasta.gz	Bacteria;Firmicutes;Bacilli;Bacillales;Bacillaceae;Bacillus
SILVA_128_SSURef_tax_silva_full_align_trunc.fasta.gz	Bacteria;Firmicutes;Bacilli;Bacillales;Bacillaceae;Bacillus
SILVA_132_SSURef_tax_silva.fasta.gz	Bacteria;Firmicutes;Bacilli;Bacillales;Bacillaceae;Bacillus
SILVA_132_SSURef_tax_silva_full_align_trunc.fasta.gz	Bacteria;Firmicutes;Bacilli;Bacillales;Bacillaceae;Bacillus
bac_ssu_r86.1_20180911.fna.gz	Bacteria;Firmicutes;Bacilli;Bacillales;Bacillaceae_G;Bacillus_A
78	TACGTAGGTGGCAAGCGTTGTCCGGATTTATTGGGCGTAAAGCGCGCGCAGGCGGTCTTTTAAGTCTGAT_CCTGTTTGATCCCCACGCTTTCGCACATCAGCGTCAGTTACAGACCAGAGAGTCGCCTTCGCCACTGGTG
SILVA_123_SSURef_tax_silva.fasta.gz	Bacteria;Firmicutes;Bacilli;Bacillales;Staphylococcaceae;Staphylococcus
SILVA_123_SSURef_tax_silva_full_align_trunc.fasta.gz	Bacteria;Firmicutes;Bacilli;Bacillales;Staphylococcaceae;Staphylococcus
SILVA_128_SSURef_tax_silva.fasta.gz	Bacteria;Firmicutes;Bacilli;Bacillales;Listeriaceae;Listeria
SILVA_128_SSURef_tax_silva_full_align_trunc.fasta.gz	Bacteria;Firmicutes;Bacilli;Bacillales;Listeriaceae;Listeria
SILVA_132_SSURef_tax_silva.fasta.gz	Bacteria;Firmicutes;Bacilli;Bacillales;Listeriaceae;Listeria
SILVA_132_SSURef_tax_silva_full_align_trunc.fasta.gz	Bacteria;Firmicutes;Bacilli;Bacillales;Listeriaceae;Listeria
bac_ssu_r86.1_20180911.fna.gz	Bacteria;Firmicutes;Bacilli;Lactobacillales;Listeriaceae;Listeria
79	TACGTAGGTGGCAAGCGTTATCCGGAATTATTGGGCGTAAAGCGCGCGTAGGCGGTTTTTTAAGTCTGAT_CCTGTTTGCTCCCCACGCTTTCGCACATCAGCGTCAGTTACAGACCAGAAAGTCGCCTTCGCCACTGGTG
SILVA_123_SSURef_tax_silva.fasta.gz	Bacteria;Firmicutes;Bacilli;Bacillales;Staphylococcaceae;Staphylococcus
SILVA_123_SSURef_tax_silva_full_align_trunc.fasta.gz	Bacteria;Firmicutes;Bacilli;Bacillales;Staphylococcaceae;Staphylococcus
SILVA_128_SSURef_tax_silva.fasta.gz	Bacteria;Firmicutes;Bacilli;Bacillales;Staphylococcaceae;Staphylococcus
SILVA_128_SSURef_tax_silva_full_align_trunc.fasta.gz	Bacteria;Firmicutes;Bacilli;Bacillales;Staphylococcaceae;Staphylococcus
SILVA_132_SSURef_tax_silva.fasta.gz	Bacteria;Firmicutes;Bacilli;Bacillales;Staphylococcaceae;Staphylococcus
SILVA_132_SSURef_tax_silva_full_align_trunc.fasta.gz	Bacteria;Firmicutes;Bacilli;Bacillales;Staphylococcaceae;Staphylococcus
bac_ssu_r86.1_20180911.fna.gz	Bacteria;Firmicutes;Bacilli;Staphylococcales;Staphylococcaceae;Staphylococcus
80	TACGTAGGTGGCAAGCGTTATCCGGAATTATTGGGCGTAAAGCGCGCGTAGGCGGTTTTTTAAGTCTGAT_CCTGTTTGATCCCCACGCTTTCGCACATCAGCGTCAGTTACAGACCAGAAAGTCGCCTTCGCCACTGGTG
SILVA_123_SSURef_tax_silva.fasta.gz	Bacteria;Firmicutes;Bacilli;Bacillales;Staphylococcaceae;Staphylococcus
SILVA_123_SSURef_tax_silva_full_align_trunc.fasta.gz	Bacteria;Firmicutes;Bacilli;Bacillales;Staphylococcaceae;Staphylococcus
SILVA_128_SSURef_tax_silva.fasta.gz	Bacteria;Firmicutes;Bacilli;Bacillales;Staphylococcaceae;Staphylococcus
SILVA_128_SSURef_tax_silva_full_align_trunc.fasta.gz	Bacteria;Firmicutes;Bacilli;Bacillales;Staphylococcaceae;Staphylococcus
SILVA_132_SSURef_tax_silva.fasta.gz	Bacteria;Firmicutes;Bacilli;Bacillales;Staphylococcaceae;Staphylococcus
SILVA_132_SSURef_tax_silva_full_align_trunc.fasta.gz	Bacteria;Firmicutes;Bacilli;Bacillales;Staphylococcaceae;Staphylococcus
bac_ssu_r86.1_20180911.fna.gz	Bacteria;Firmicutes;Bacilli;Staphylococcales;Staphylococcaceae;Staphylococcus
81	TACGGAGGATCCGAGCGTTATCCGGATTTATTGGGTTTAAAGGGAGCGTAGATGGATGTTTAAGTCAGTT_CCTGTTTGATACCCACACTTTCGAGCCTCACTGTCAGTTGCAGCTTAGCAGGCTGCCTTCGCAATCGGAG
SILVA_123_SSURef_tax_silva.fasta.gz	Bacteria;Bacteroidetes;Bacteroidia;Bacteroidales;Bacteroidaceae;Bacteroides
SILVA_123_SSURef_tax_silva_full_align_trunc.fasta.gz	Bacteria;Bacteroidetes;Bacteroidia;Bacteroidales;Bacteroidaceae;Bacteroides
SILVA_128_SSURef_tax_silva.fasta.gz	Bacteria;Bacteroidetes;Bacteroidia;Bacteroidales;Bacteroidaceae;Bacteroides
SILVA_128_SSURef_tax_silva_full_align_trunc.fasta.gz	Bacteria;Bacteroidetes;Bacteroidia;Bacteroidales;Bacteroidaceae;Bacteroides
SILVA_132_SSURef_tax_silva.fasta.gz	Bacteria;Bacteroidetes;Bacteroidia;Bacteroidales;Bacteroidaceae;Bacteroides
SILVA_132_SSURef_tax_silva_full_align_trunc.fasta.gz	Bacteria;Bacteroidetes;Bacteroidia;Bacteroidales;Bacteroidaceae;Bacteroides
bac_ssu_r86.1_20180911.fna.gz	Bacteria;Bacteroidota
82	TACGTAGGTCCCGAGCGTTGTCCGGATTTATTGGGCGTAAAGCGAGCGCAGGCGGTTCTTTAAGTCTGAA_CCTGTTTGCTCCCCACGCTTTCGAGCCTCAGCGTCAGTTACAGACCAGAGAGCCGCCTTCGCCACCGGTG
SILVA_123_SSURef_tax_silva.fasta.gz	Bacteria;Firmicutes;Bacilli;Lactobacillales;Streptococcaceae;Streptococcus
SILVA_123_SSURef_tax_silva_full_align_trunc.fasta.gz	Bacteria;Firmicutes;Bacilli;Lactobacillales;Streptococcaceae;Streptococcus
SILVA_128_SSURef_tax_silva.fasta.gz	Bacteria;Firmicutes;Bacilli;Lactobacillales;Streptococcaceae;Streptococcus
SILVA_128_SSURef_tax_silva_full_align_trunc.fasta.gz	Bacteria;Firmicutes;Bacilli;Lactobacillales;Streptococcaceae;Streptococcus
SILVA_132_SSURef_tax_silva.fasta.gz	Bacteria;Firmicutes;Bacilli;Lactobacillales;Streptococcaceae;Streptococcus
SILVA_132_SSURef_tax_silva_full_align_trunc.fasta.gz	Bacteria;Firmicutes;Bacilli;Lactobacillales;Streptococcaceae;Streptococcus
bac_ssu_r86.1_20180911.fna.gz	Bacteria;Firmicutes;Bacilli;Lactobacillales;Streptococcaceae;Streptococcus
83	TACGTAGGTGGCAAGCGTTGTCCGGATTTATTGGGCGTAAAGCGCGCGCAGGTGGTTTCTTAAGTCTGAT_CCTGTTTGCTCCCCACGCTTTCGCGCCTCAGTGTCAGTTACAGACCAGAAAGTCGCCTTCGCCACTGGTG
SILVA_123_SSURef_tax_silva.fasta.gz	Bacteria;Firmicutes;Bacilli;Bacillales;Planococcaceae
SILVA_123_SSURef_tax_silva_full_align_trunc.fasta.gz	Bacteria;Firmicutes;Bacilli;Bacillales;Planococcaceae
SILVA_128_SSURef_tax_silva.fasta.gz	Bacteria;Firmicutes;Bacilli;Bacillales;Planococcaceae
SILVA_128_SSURef_tax_silva_full_align_trunc.fasta.gz	Bacteria;Firmicutes;Bacilli;Bacillales;Planococcaceae
SILVA_132_SSURef_tax_silva.fasta.gz	Bacteria;Firmicutes;Bacilli;Bacillales;Planococcaceae
SILVA_132_SSURef_tax_silva_full_align_trunc.fasta.gz	Bacteria;Firmicutes;Bacilli;Bacillales;Planococcaceae
bac_ssu_r86.1_20180911.fna.gz	Bacteria;Firmicutes;Bacilli
84	TACGGAGGATCCGAGCGTTATCCGGATTTATTGGGTTTAAAGGGAGCGTAGATGGATGTTTAAGTCAGTT_CCTGTTTGCTACCCACACTTTCGAGCCTCAATGTCAGTTGCAGCTTAGCAGGCTGCCTTCGCAATCGGAG
SILVA_123_SSURef_tax_silva.fasta.gz	Bacteria;Bacteroidetes;Bacteroidia;Bacteroidales;Bacteroidaceae;Bacteroides
SILVA_123_SSURef_tax_silva_full_align_trunc.fasta.gz	Bacteria;Bacteroidetes;Bacteroidia;Bacteroidales;Bacteroidaceae;Bacteroides
SILVA_128_SSURef_tax_silva.fasta.gz	Bacteria;Bacteroidetes;Bacteroidia;Bacteroidales;Bacteroidaceae;Bacteroides
SILVA_128_SSURef_tax_silva_full_align_trunc.fasta.gz	Bacteria;Bacteroidetes;Bacteroidia;Bacteroidales;Bacteroidaceae;Bacteroides
SILVA_132_SSURef_tax_silva.fasta.gz	Bacteria;Bacteroidetes;Bacteroidia;Bacteroidales;Bacteroidaceae;Bacteroides
SILVA_132_SSURef_tax_silva_full_align_trunc.fasta.gz	Bacteria;Bacteroidetes;Bacteroidia;Bacteroidales;Bacteroidaceae;Bacteroides
bac_ssu_r86.1_20180911.fna.gz	Bacteria;Bacteroidota
85	TACGTAGGTGGCAAGCGTTATCCGGAATTATTGGGCGTAAAGCGCGCGTAGGCGGTTTTTTAAGTCTGAT_CCTGTTTGATCCCCACGCTTTCGCACATCAGCGTCAGTTACAGACCAGAAAGTCGCCTTCGCCACTGCTG
SILVA_123_SSURef_tax_silva.fasta.gz	Bacteria;Firmicutes;Bacilli;Bacillales;Staphylococcaceae;Staphylococcus
SILVA_123_SSURef_tax_silva_full_align_trunc.fasta.gz	Bacteria;Firmicutes;Bacilli;Bacillales;Staphylococcaceae;Staphylococcus
SILVA_128_SSURef_tax_silva.fasta.gz	Bacteria;Firmicutes;Bacilli;Bacillales;Staphylococcaceae;Staphylococcus
SILVA_128_SSURef_tax_silva_full_align_trunc.fasta.gz	Bacteria;Firmicutes;Bacilli;Bacillales;Staphylococcaceae;Staphylococcus
SILVA_132_SSURef_tax_silva.fasta.gz	Bacteria;Firmicutes;Bacilli;Bacillales;Staphylococcaceae;Staphylococcus
SILVA_132_SSURef_tax_silva_full_align_trunc.fasta.gz	Bacteria;Firmicutes;Bacilli;Bacillales;Staphylococcaceae;Staphylococcus
bac_ssu_r86.1_20180911.fna.gz	Bacteria;Firmicutes;Bacilli;Staphylococcales;Staphylococcaceae;Staphylococcus
86	TACGTAGGGTGCGAGCGTTAATCGGAATTACTGGGCGTAAAGCGGGCGCAGACGGTTACTTAAGCAGGAT_CCTGTTTGCTCCCCACGCTTTCGGGCATGAACGTCAGTGTTGTCCCAGGAGGCTGCCTTCGCCATCGGTA
SILVA_123_SSURef_tax_silva.fasta.gz	Bacteria;Proteobacteria;Betaproteobacteria;Neisseriales;Neisseriaceae;Neisseria
SILVA_123_SSURef_tax_silva_full_align_trunc.fasta.gz	Bacteria;Proteobacteria;Betaproteobacteria;Neisseriales;Neisseriaceae;Neisseria
SILVA_128_SSURef_tax_silva.fasta.gz	Bacteria;Proteobacteria;Betaproteobacteria;Neisseriales;Neisseriaceae;Neisseria
SILVA_128_SSURef_tax_silva_full_align_trunc.fasta.gz	Bacteria;Proteobacteria;Betaproteobacteria;Neisseriales;Neisseriaceae;Neisseria
SILVA_132_SSURef_tax_silva.fasta.gz	Bacteria;Proteobacteria;Gammaproteobacteria;Betaproteobacteriales;Neisseriaceae;Neisseria
SILVA_132_SSURef_tax_silva_full_align_trunc.fasta.gz	Bacteria;Proteobacteria;Gammaproteobacteria;Betaproteobacteriales;Neisseriaceae;Neisseria
bac_ssu_r86.1_20180911.fna.gz	Bacteria;Proteobacteria;Gammaproteobacteria;Betaproteobacteriales;Neisseriaceae;Neisseria

## Sheet: mock21
1	TACGGAGGGTGCAAGCGTTAATCGGAATTACTGGGCGTAAAGCGCACGCAGGCGGTTTGTTAAGTCAGAT_CCTGTTTGCTCCCCACGCTTTCGCACCTGAGCGTCAGTCTTCGTCCAGGGAGCCGCCTTCGCCACCGGTA
SILVA_123_SSURef_tax_silva.fasta.gz	Bacteria;Proteobacteria;Gammaproteobacteria;Enterobacteriales;Enterobacteriaceae
SILVA_123_SSURef_tax_silva_full_align_trunc.fasta.gz	Bacteria;Proteobacteria;Gammaproteobacteria;Enterobacteriales;Enterobacteriaceae
SILVA_128_SSURef_tax_silva.fasta.gz	Bacteria;Proteobacteria;Gammaproteobacteria;Enterobacteriales;Enterobacteriaceae
SILVA_128_SSURef_tax_silva_full_align_trunc.fasta.gz	Bacteria;Proteobacteria;Gammaproteobacteria;Enterobacteriales;Enterobacteriaceae
SILVA_132_SSURef_tax_silva.fasta.gz	Bacteria;Proteobacteria;Gammaproteobacteria;Enterobacteriales;Enterobacteriaceae
SILVA_132_SSURef_tax_silva_full_align_trunc.fasta.gz	Bacteria;Proteobacteria;Gammaproteobacteria;Enterobacteriales;Enterobacteriaceae
bac_ssu_r86.1_20180911.fna.gz	Bacteria;Proteobacteria;Gammaproteobacteria;Enterobacterales;Enterobacteriaceae
2	TACGTAGGTCCCGAGCGTTGTCCGGATTTATTGGGCGTAAAGGGAGCGCAGGCGGTCAGGAAAGTCTGGA_CCTGTTCGCTACCCACGCTTTCGAGCCTCAGCGTCAGTGACAGACCAGAGAGCCGCCTTCGCCACTGGTG
SILVA_123_SSURef_tax_silva.fasta.gz	Bacteria;Firmicutes;Bacilli;Lactobacillales;Streptococcaceae;Streptococcus
SILVA_123_SSURef_tax_silva_full_align_trunc.fasta.gz	Bacteria;Firmicutes;Bacilli;Lactobacillales;Streptococcaceae;Streptococcus
SILVA_128_SSURef_tax_silva.fasta.gz	Bacteria;Firmicutes;Bacilli;Lactobacillales;Streptococcaceae;Streptococcus
SILVA_128_SSURef_tax_silva_full_align_trunc.fasta.gz	Bacteria;Firmicutes;Bacilli;Lactobacillales;Streptococcaceae;Streptococcus
SILVA_132_SSURef_tax_silva.fasta.gz	Bacteria;Firmicutes;Bacilli;Lactobacillales;Streptococcaceae;Streptococcus
SILVA_132_SSURef_tax_silva_full_align_trunc.fasta.gz	Bacteria;Firmicutes;Bacilli;Lactobacillales;Streptococcaceae;Streptococcus
bac_ssu_r86.1_20180911.fna.gz	Bacteria;Firmicutes;Bacilli;Lactobacillales;Streptococcaceae;Streptococcus
3	TACGTAGGTGGCAAGCGTTATCCGGAATTATTGGGCGTAAAGCGCGCGTAGGCGGTTTTTTAAGTCTGAT_CCTGTTTGATCCCCACGCTTTCGCACCTCAGCGTCAGTTACAGACCAGAAAGTCGCCTTCGCCACTGGTG
SILVA_123_SSURef_tax_silva.fasta.gz	Bacteria;Firmicutes;Bacilli;Bacillales;Staphylococcaceae;Staphylococcus
SILVA_123_SSURef_tax_silva_full_align_trunc.fasta.gz	Bacteria;Firmicutes;Bacilli;Bacillales;Staphylococcaceae;Staphylococcus
SILVA_128_SSURef_tax_silva.fasta.gz	Bacteria;Firmicutes;Bacilli;Bacillales;Staphylococcaceae;Staphylococcus
SILVA_128_SSURef_tax_silva_full_align_trunc.fasta.gz	Bacteria;Firmicutes;Bacilli;Bacillales;Staphylococcaceae;Staphylococcus
SILVA_132_SSURef_tax_silva.fasta.gz	Bacteria;Firmicutes;Bacilli;Bacillales;Staphylococcaceae;Staphylococcus
SILVA_132_SSURef_tax_silva_full_align_trunc.fasta.gz	Bacteria;Firmicutes;Bacilli;Bacillales;Staphylococcaceae;Staphylococcus
bac_ssu_r86.1_20180911.fna.gz	Bacteria;Firmicutes;Bacilli;Staphylococcales;Staphylococcaceae;Staphylococcus
4	TACGTAGGTGGCAAGCGTTATCCGGCATTATTGGGCGTAAAGCGCGCGTAGGCGGTTTTTTAAGTCTGAT_CCTGTTTGATCCCCACGCTTTCGCACATCAGCGTCAGTTACAGACCAGAAAGTCGCCTTCGCCACTGGTG
SILVA_123_SSURef_tax_silva.fasta.gz	Bacteria;Firmicutes;Bacilli;Bacillales;Staphylococcaceae;Staphylococcus
SILVA_123_SSURef_tax_silva_full_align_trunc.fasta.gz	Bacteria;Firmicutes;Bacilli;Bacillales;Staphylococcaceae;Staphylococcus
SILVA_128_SSURef_tax_silva.fasta.gz	Bacteria;Firmicutes;Bacilli;Bacillales;Staphylococcaceae;Staphylococcus
SILVA_128_SSURef_tax_silva_full_align_trunc.fasta.gz	Bacteria;Firmicutes;Bacilli;Bacillales;Staphylococcaceae;Staphylococcus
SILVA_132_SSURef_tax_silva.fasta.gz	Bacteria;Firmicutes;Bacilli;Bacillales;Staphylococcaceae;Staphylococcus
SILVA_132_SSURef_tax_silva_full_align_trunc.fasta.gz	Bacteria;Firmicutes;Bacilli;Bacillales;Staphylococcaceae;Staphylococcus
bac_ssu_r86.1_20180911.fna.gz	Bacteria;Firmicutes;Bacilli;Staphylococcales;Staphylococcaceae;Staphylococcus
5	TACGTAGGTGGCAAGCGTTGTCCGGATTTACTGGGCGTAAAGGGAGCGTAGGTGGATATTTAAGTGGGAT_CCTGTTTGCTCCCCACGCTTTCGCGCCTCAGTGTCAGTTACAGTCCAGAAAGTCGCCTTCGCCACTGGTA
SILVA_123_SSURef_tax_silva.fasta.gz	Bacteria;Firmicutes;Clostridia;Clostridiales;Clostridiaceae_1;Clostridium_sensu_stricto_1
SILVA_123_SSURef_tax_silva_full_align_trunc.fasta.gz	Bacteria;Firmicutes;Clostridia;Clostridiales;Clostridiaceae_1;Clostridium_sensu_stricto_1
SILVA_128_SSURef_tax_silva.fasta.gz	Bacteria;Firmicutes;Clostridia;Clostridiales;Clostridiaceae_1;Clostridium_sensu_stricto_1
SILVA_128_SSURef_tax_silva_full_align_trunc.fasta.gz	Bacteria;Firmicutes;Clostridia;Clostridiales;Clostridiaceae_1;Clostridium_sensu_stricto_1
SILVA_132_SSURef_tax_silva.fasta.gz	Bacteria;Firmicutes;Clostridia;Clostridiales;Clostridiaceae_1;Clostridium_sensu_stricto_1
SILVA_132_SSURef_tax_silva_full_align_trunc.fasta.gz	Bacteria;Firmicutes;Clostridia;Clostridiales;Clostridiaceae_1;Clostridium_sensu_stricto_1
bac_ssu_r86.1_20180911.fna.gz	Bacteria;Firmicutes_A;Clostridia;Clostridiales;Clostridiaceae;Clostridium
6	TACGTAGGTGGCAAGCGTTATCCGGAATTATTGGGCGTAAAGCGCGCGTAGGCGGTTTTTTAAGTCTGAT_CCTGTTCGCTACCCACGCTTTCGCACATCAGCGTCAGTTACAGACCAGAAAGTCGCCTTCGCCACTGGTG
SILVA_123_SSURef_tax_silva.fasta.gz	Bacteria;Firmicutes;Bacilli;Bacillales;Staphylococcaceae;Staphylococcus
SILVA_123_SSURef_tax_silva_full_align_trunc.fasta.gz	Bacteria;Firmicutes;Bacilli;Bacillales;Staphylococcaceae;Staphylococcus
SILVA_128_SSURef_tax_silva.fasta.gz	Bacteria;Firmicutes;Bacilli;Bacillales;Staphylococcaceae;Staphylococcus
SILVA_128_SSURef_tax_silva_full_align_trunc.fasta.gz	Bacteria;Firmicutes;Bacilli;Bacillales;Staphylococcaceae;Staphylococcus
SILVA_132_SSURef_tax_silva.fasta.gz	Bacteria;Firmicutes;Bacilli;Bacillales;Staphylococcaceae;Staphylococcus
SILVA_132_SSURef_tax_silva_full_align_trunc.fasta.gz	Bacteria;Firmicutes;Bacilli;Bacillales;Staphylococcaceae;Staphylococcus
bac_ssu_r86.1_20180911.fna.gz	Bacteria;Firmicutes;Bacilli;Staphylococcales;Staphylococcaceae;Staphylococcus
7	TACGTAGGGTGCAAGCGTTAATCGGAATTACTGGGCGTAAAGCGCACGCAGGCGGTTTGTTAAGTCAGAT_CCTGTTTGCTCCCCACGCTTTCGCACCTGAGCGTCAGTCTTCGTCCAGGGGGCCGCCTTCGCCACCGGTA
SILVA_123_SSURef_tax_silva.fasta.gz	Bacteria;Proteobacteria;Gammaproteobacteria;Enterobacteriales;Enterobacteriaceae
SILVA_123_SSURef_tax_silva_full_align_trunc.fasta.gz	Bacteria;Proteobacteria;Gammaproteobacteria;Enterobacteriales;Enterobacteriaceae
SILVA_128_SSURef_tax_silva.fasta.gz	Bacteria;Proteobacteria;Gammaproteobacteria;Enterobacteriales;Enterobacteriaceae
SILVA_128_SSURef_tax_silva_full_align_trunc.fasta.gz	Bacteria;Proteobacteria;Gammaproteobacteria;Enterobacteriales;Enterobacteriaceae
SILVA_132_SSURef_tax_silva.fasta.gz	Bacteria;Proteobacteria;Gammaproteobacteria;Enterobacteriales;Enterobacteriaceae
SILVA_132_SSURef_tax_silva_full_align_trunc.fasta.gz	Bacteria;Proteobacteria;Gammaproteobacteria;Enterobacteriales;Enterobacteriaceae
bac_ssu_r86.1_20180911.fna.gz	Bacteria;Proteobacteria;Gammaproteobacteria;Enterobacterales;Enterobacteriaceae
8	TACGGAGGGTGCAAGCGTTAATCGGAATTACTGGGCGTAAAGCGCACGCAGGCGGTTTGTTAAGTCAGAT_CCTGTTTGCTCCCCACGCTTTCGCACCTGAGCGTCAGTCTTCGTCCAGGGGGCCGCCTTCGCCACCGGTC
SILVA_123_SSURef_tax_silva.fasta.gz	Bacteria;Proteobacteria;Gammaproteobacteria;Enterobacteriales;Enterobacteriaceae
SILVA_123_SSURef_tax_silva_full_align_trunc.fasta.gz	Bacteria;Proteobacteria;Gammaproteobacteria;Enterobacteriales;Enterobacteriaceae
SILVA_128_SSURef_tax_silva.fasta.gz	Bacteria;Proteobacteria;Gammaproteobacteria;Enterobacteriales;Enterobacteriaceae
SILVA_128_SSURef_tax_silva_full_align_trunc.fasta.gz	Bacteria;Proteobacteria;Gammaproteobacteria;Enterobacteriales;Enterobacteriaceae
SILVA_132_SSURef_tax_silva.fasta.gz	Bacteria;Proteobacteria;Gammaproteobacteria;Enterobacteriales;Enterobacteriaceae
SILVA_132_SSURef_tax_silva_full_align_trunc.fasta.gz	Bacteria;Proteobacteria;Gammaproteobacteria;Enterobacteriales;Enterobacteriaceae
bac_ssu_r86.1_20180911.fna.gz	Bacteria;Proteobacteria;Gammaproteobacteria;Enterobacterales;Enterobacteriaceae
9	TACGGAGGGTGCAAGCGTTAATCGGAATTACTGGGCGTAAAGCGCACGCAGGCGGTTTGTTAAGTCAGAT_CCTGTTTGCTCCCCACGCTTTCGCACCTGAGCGTCAGTCTTCGTCCAGGGGGCCGCCTTCGCCACCGGTA
SILVA_123_SSURef_tax_silva.fasta.gz	Bacteria;Proteobacteria;Gammaproteobacteria;Enterobacteriales;Enterobacteriaceae
SILVA_123_SSURef_tax_silva_full_align_trunc.fasta.gz	Bacteria;Proteobacteria;Gammaproteobacteria;Enterobacteriales;Enterobacteriaceae
SILVA_128_SSURef_tax_silva.fasta.gz	Bacteria;Proteobacteria;Gammaproteobacteria;Enterobacteriales;Enterobacteriaceae
SILVA_128_SSURef_tax_silva_full_align_trunc.fasta.gz	Bacteria;Proteobacteria;Gammaproteobacteria;Enterobacteriales;Enterobacteriaceae
SILVA_132_SSURef_tax_silva.fasta.gz	Bacteria;Proteobacteria;Gammaproteobacteria;Enterobacteriales;Enterobacteriaceae
SILVA_132_SSURef_tax_silva_full_align_trunc.fasta.gz	Bacteria;Proteobacteria;Gammaproteobacteria;Enterobacteriales;Enterobacteriaceae
bac_ssu_r86.1_20180911.fna.gz	Bacteria;Proteobacteria;Gammaproteobacteria;Enterobacterales;Enterobacteriaceae
10	TACGAAGGGTGCAAGCGTTAATCGGAATTACTGGGCGTAAAGCGCGCGTAGGTGGTTCAGCAAGTTGGAT_CCTGTTTGCTCCCCACGCTTTCGCACCTCAGTGTCAGTATCAGTCCAGGTGGTCGCCTTCGCCACTGGTG
SILVA_123_SSURef_tax_silva.fasta.gz	Bacteria;Proteobacteria;Gammaproteobacteria;Pseudomonadales;Pseudomonadaceae;Pseudomonas
SILVA_123_SSURef_tax_silva_full_align_trunc.fasta.gz	Bacteria;Proteobacteria;Gammaproteobacteria;Pseudomonadales;Pseudomonadaceae;Pseudomonas
SILVA_128_SSURef_tax_silva.fasta.gz	Bacteria;Proteobacteria;Gammaproteobacteria;Pseudomonadales;Pseudomonadaceae;Pseudomonas
SILVA_128_SSURef_tax_silva_full_align_trunc.fasta.gz	Bacteria;Proteobacteria;Gammaproteobacteria;Pseudomonadales;Pseudomonadaceae;Pseudomonas
SILVA_132_SSURef_tax_silva.fasta.gz	Bacteria;Proteobacteria;Gammaproteobacteria;Pseudomonadales;Pseudomonadaceae;Pseudomonas
SILVA_132_SSURef_tax_silva_full_align_trunc.fasta.gz	Bacteria;Proteobacteria;Gammaproteobacteria;Pseudomonadales;Pseudomonadaceae;Pseudomonas
bac_ssu_r86.1_20180911.fna.gz	Bacteria;Proteobacteria;Gammaproteobacteria;Pseudomonadales;Pseudomonadaceae
11	TACGGAGGGTGCAAGCGTTAATCGGAATTACTGGGCGTAAAGCGCACGCAGGCGGTTTGTTAAGTCAGAT_ACTGTTTGCTCCCCACGCTTTCGCACCTGAGCGTCAGTCTTCGTCCAGGGGGCCGCCTTCGCCACCGGTA
SILVA_123_SSURef_tax_silva.fasta.gz	Bacteria;Proteobacteria;Gammaproteobacteria;Enterobacteriales;Enterobacteriaceae
SILVA_123_SSURef_tax_silva_full_align_trunc.fasta.gz	Bacteria;Proteobacteria;Gammaproteobacteria;Enterobacteriales;Enterobacteriaceae
SILVA_128_SSURef_tax_silva.fasta.gz	Bacteria;Proteobacteria;Gammaproteobacteria;Enterobacteriales;Enterobacteriaceae
SILVA_128_SSURef_tax_silva_full_align_trunc.fasta.gz	Bacteria;Proteobacteria;Gammaproteobacteria;Enterobacteriales;Enterobacteriaceae
SILVA_132_SSURef_tax_silva.fasta.gz	Bacteria;Proteobacteria;Gammaproteobacteria;Enterobacteriales;Enterobacteriaceae
SILVA_132_SSURef_tax_silva_full_align_trunc.fasta.gz	Bacteria;Proteobacteria;Gammaproteobacteria;Enterobacteriales;Enterobacteriaceae
bac_ssu_r86.1_20180911.fna.gz	Bacteria;Proteobacteria;Gammaproteobacteria;Enterobacterales;Enterobacteriaceae
12	TACGTAGGTGGCAAGCGTTATCCGGAATTATTGGGCGTAAAGCGCGCGTAGGCGGTTTTTTAAGTCTGAT_CCTGTTTGCTCCCCACGCTTTCGCACCTCAGCGTCAGTTACAGACCAGAAAGTCGCCTTCGCCACTGGTG
SILVA_123_SSURef_tax_silva.fasta.gz	Bacteria;Firmicutes;Bacilli;Bacillales;Staphylococcaceae;Staphylococcus
SILVA_123_SSURef_tax_silva_full_align_trunc.fasta.gz	Bacteria;Firmicutes;Bacilli;Bacillales;Staphylococcaceae;Staphylococcus
SILVA_128_SSURef_tax_silva.fasta.gz	Bacteria;Firmicutes;Bacilli;Bacillales;Staphylococcaceae;Staphylococcus
SILVA_128_SSURef_tax_silva_full_align_trunc.fasta.gz	Bacteria;Firmicutes;Bacilli;Bacillales;Staphylococcaceae;Staphylococcus
SILVA_132_SSURef_tax_silva.fasta.gz	Bacteria;Firmicutes;Bacilli;Bacillales;Staphylococcaceae;Staphylococcus
SILVA_132_SSURef_tax_silva_full_align_trunc.fasta.gz	Bacteria;Firmicutes;Bacilli;Bacillales;Staphylococcaceae;Staphylococcus
bac_ssu_r86.1_20180911.fna.gz	Bacteria;Firmicutes;Bacilli;Staphylococcales;Staphylococcaceae;Staphylococcus
13	TACGTAGGTGGCAAGCGTTATCCGGAATTATTGGGCGTAAAGCGCGCGTAGGCGGTTTTTTAAGTCTGAT_CCTGTTCGCTACCCACGCTTTCGAGCCTCAGCGTCAGTGACAGACCAGAAAGTCGCCTTCGCCACTGGTG
SILVA_123_SSURef_tax_silva.fasta.gz	Bacteria;Firmicutes;Bacilli;Bacillales;Staphylococcaceae;Staphylococcus
SILVA_123_SSURef_tax_silva_full_align_trunc.fasta.gz	Bacteria;Firmicutes;Bacilli;Bacillales;Staphylococcaceae;Staphylococcus
SILVA_128_SSURef_tax_silva.fasta.gz	Bacteria;Firmicutes;Bacilli;Bacillales;Staphylococcaceae;Staphylococcus
SILVA_128_SSURef_tax_silva_full_align_trunc.fasta.gz	Bacteria;Firmicutes;Bacilli;Bacillales;Staphylococcaceae;Staphylococcus
SILVA_132_SSURef_tax_silva.fasta.gz	Bacteria;Firmicutes;Bacilli;Bacillales;Staphylococcaceae;Staphylococcus
SILVA_132_SSURef_tax_silva_full_align_trunc.fasta.gz	Bacteria;Firmicutes;Bacilli;Bacillales;Staphylococcaceae;Staphylococcus
bac_ssu_r86.1_20180911.fna.gz	Bacteria;Firmicutes;Bacilli
14	TACGTAGGTCCCGAGCGTTGTCCGGATTTATTGGGCGTAAAGCGAGCGCAGGCGGTTCTTTAAGTCTGAA_CCTGTTTGCTCCCCACGCTTTCGAGCCTCAGCGTCAGTTACAGACCAGAGAGCCGCTTTCGCCACCGGTG
SILVA_123_SSURef_tax_silva.fasta.gz	Bacteria;Firmicutes;Bacilli;Lactobacillales;Streptococcaceae;Streptococcus
SILVA_123_SSURef_tax_silva_full_align_trunc.fasta.gz	Bacteria;Firmicutes;Bacilli;Lactobacillales;Streptococcaceae;Streptococcus
SILVA_128_SSURef_tax_silva.fasta.gz	Bacteria;Firmicutes;Bacilli;Lactobacillales;Streptococcaceae;Streptococcus
SILVA_128_SSURef_tax_silva_full_align_trunc.fasta.gz	Bacteria;Firmicutes;Bacilli;Lactobacillales;Streptococcaceae;Streptococcus
SILVA_132_SSURef_tax_silva.fasta.gz	Bacteria;Firmicutes;Bacilli;Lactobacillales;Streptococcaceae;Streptococcus
SILVA_132_SSURef_tax_silva_full_align_trunc.fasta.gz	Bacteria;Firmicutes;Bacilli;Lactobacillales;Streptococcaceae;Streptococcus
bac_ssu_r86.1_20180911.fna.gz	Bacteria;Firmicutes;Bacilli;Lactobacillales;Streptococcaceae;Streptococcus
15	TACGGAGGGGGCTAGCGTTATTCGGAATTACTGGGCGTAAAGCGCACGTAGGCGGATCGGAAAGTCAGAG_CCTGTTTGCTCCCCACGCTTTCGCACCTCAGCGTCAGTATCGAGCCAGTGAGCCGCCTTCGCCACTGCTG
SILVA_123_SSURef_tax_silva.fasta.gz	Bacteria;Proteobacteria;Alphaproteobacteria;Rhodobacterales;Rhodobacteraceae;Rhodobacter
SILVA_123_SSURef_tax_silva_full_align_trunc.fasta.gz	Bacteria;Proteobacteria;Alphaproteobacteria;Rhodobacterales;Rhodobacteraceae;Rhodobacter
SILVA_128_SSURef_tax_silva.fasta.gz	Bacteria;Proteobacteria;Alphaproteobacteria;Rhodobacterales;Rhodobacteraceae;Rhodobacter
SILVA_128_SSURef_tax_silva_full_align_trunc.fasta.gz	Bacteria;Proteobacteria;Alphaproteobacteria;Rhodobacterales;Rhodobacteraceae;Rhodobacter
SILVA_132_SSURef_tax_silva.fasta.gz	Bacteria;Proteobacteria;Alphaproteobacteria;Rhodobacterales;Rhodobacteraceae;Rhodobacter
SILVA_132_SSURef_tax_silva_full_align_trunc.fasta.gz	Bacteria;Proteobacteria;Alphaproteobacteria;Rhodobacterales;Rhodobacteraceae;Rhodobacter
bac_ssu_r86.1_20180911.fna.gz	Bacteria;Proteobacteria;Alphaproteobacteria;Rhodobacterales;Rhodobacteraceae;Rhodobacter_A
16	TACGTAGGTGGCAAGCGTTATCCGGAATTATTGGGCGTAAAGCGCGCGCAGGCGGTTTTTTAAGTCTGAT_CCTGTTTGATCCCCACGCTTTCGCACATCAGCGTCAGTTACAGACCAGAAAGTCGCCTTCGCCACTGGTG
SILVA_123_SSURef_tax_silva.fasta.gz	Bacteria;Firmicutes;Bacilli;Bacillales;Staphylococcaceae;Staphylococcus
SILVA_123_SSURef_tax_silva_full_align_trunc.fasta.gz	Bacteria;Firmicutes;Bacilli;Bacillales;Staphylococcaceae;Staphylococcus
SILVA_128_SSURef_tax_silva.fasta.gz	Bacteria;Firmicutes;Bacilli;Bacillales;Staphylococcaceae;Staphylococcus
SILVA_128_SSURef_tax_silva_full_align_trunc.fasta.gz	Bacteria;Firmicutes;Bacilli;Bacillales;Staphylococcaceae;Staphylococcus
SILVA_132_SSURef_tax_silva.fasta.gz	Bacteria;Firmicutes;Bacilli;Bacillales;Staphylococcaceae;Staphylococcus
SILVA_132_SSURef_tax_silva_full_align_trunc.fasta.gz	Bacteria;Firmicutes;Bacilli;Bacillales;Staphylococcaceae;Staphylococcus
bac_ssu_r86.1_20180911.fna.gz	Bacteria;Firmicutes;Bacilli;Staphylococcales;Staphylococcaceae;Staphylococcus
17	TACGTAGGTGGCAAGCGTTATCCGGAATTATTGGGCGTAAAGCGCGCGTAGGCGGTTTTTTAAGTCTGAT_ACTGTTTGATCCCCACGCTTTCGCACATCAGCGTCAGTTACAGACCAGAAAGTCGCCTTCGCCACTGGTG
SILVA_123_SSURef_tax_silva.fasta.gz	Bacteria;Firmicutes;Bacilli;Bacillales;Staphylococcaceae;Staphylococcus
SILVA_123_SSURef_tax_silva_full_align_trunc.fasta.gz	Bacteria;Firmicutes;Bacilli;Bacillales;Staphylococcaceae;Staphylococcus
SILVA_128_SSURef_tax_silva.fasta.gz	Bacteria;Firmicutes;Bacilli;Bacillales;Staphylococcaceae;Staphylococcus
SILVA_128_SSURef_tax_silva_full_align_trunc.fasta.gz	Bacteria;Firmicutes;Bacilli;Bacillales;Staphylococcaceae;Staphylococcus
SILVA_132_SSURef_tax_silva.fasta.gz	Bacteria;Firmicutes;Bacilli;Bacillales;Staphylococcaceae;Staphylococcus
SILVA_132_SSURef_tax_silva_full_align_trunc.fasta.gz	Bacteria;Firmicutes;Bacilli;Bacillales;Staphylococcaceae;Staphylococcus
bac_ssu_r86.1_20180911.fna.gz	Bacteria;Firmicutes;Bacilli;Staphylococcales;Staphylococcaceae;Staphylococcus
18	TACGTAGGTCCCGAGCGTTGTCCGGATTTATTGGGCGTAAAGGGAGCGCAGGCGGTCAGGAAAGTCTGGA_CCTGTTCGCTACCCACGCTTTCGAGCCTCAGCGTCAGTTACAGACCAGAGAGCCGCTTTCGCCACTGGTG
SILVA_123_SSURef_tax_silva.fasta.gz	Bacteria;Firmicutes;Bacilli;Lactobacillales;Streptococcaceae;Streptococcus
SILVA_123_SSURef_tax_silva_full_align_trunc.fasta.gz	Bacteria;Firmicutes;Bacilli;Lactobacillales;Streptococcaceae;Streptococcus
SILVA_128_SSURef_tax_silva.fasta.gz	Bacteria;Firmicutes;Bacilli;Lactobacillales;Streptococcaceae;Streptococcus
SILVA_128_SSURef_tax_silva_full_align_trunc.fasta.gz	Bacteria;Firmicutes;Bacilli;Lactobacillales;Streptococcaceae;Streptococcus
SILVA_132_SSURef_tax_silva.fasta.gz	Bacteria;Firmicutes;Bacilli;Lactobacillales;Streptococcaceae;Streptococcus
SILVA_132_SSURef_tax_silva_full_align_trunc.fasta.gz	Bacteria;Firmicutes;Bacilli;Lactobacillales;Streptococcaceae;Streptococcus
bac_ssu_r86.1_20180911.fna.gz	Bacteria;Firmicutes;Bacilli;Lactobacillales;Streptococcaceae;Streptococcus
19	TACGTAGGTCCCGAGCGTTGTCCGGATTTATTGGGCGTAAAGGGAGCGCAGGCGGTCAGGAAAGTCTGGA_CCTGTTCGCTACCCACGCTTTCGAGCCTCAGCGTCAGTGACAGACCAGAGCGCCGCTTTCGCCACTGGTG
SILVA_123_SSURef_tax_silva.fasta.gz	Bacteria;Firmicutes;Bacilli;Lactobacillales;Streptococcaceae;Streptococcus
SILVA_123_SSURef_tax_silva_full_align_trunc.fasta.gz	Bacteria;Firmicutes;Bacilli;Lactobacillales;Streptococcaceae;Streptococcus
SILVA_128_SSURef_tax_silva.fasta.gz	Bacteria;Firmicutes;Bacilli;Lactobacillales;Streptococcaceae;Streptococcus
SILVA_128_SSURef_tax_silva_full_align_trunc.fasta.gz	Bacteria;Firmicutes;Bacilli;Lactobacillales;Streptococcaceae;Streptococcus
SILVA_132_SSURef_tax_silva.fasta.gz	Bacteria;Firmicutes;Bacilli;Lactobacillales;Streptococcaceae;Streptococcus
SILVA_132_SSURef_tax_silva_full_align_trunc.fasta.gz	Bacteria;Firmicutes;Bacilli;Lactobacillales;Streptococcaceae;Streptococcus
bac_ssu_r86.1_20180911.fna.gz	Bacteria;Firmicutes;Bacilli;Lactobacillales;Streptococcaceae;Streptococcus
20	TACGGAGGGTGCAAGCGTTAATCGGAATTACTGGGCGTAAAGCGCACGCAGGCGGTTTGTTAAGTCAGAT_CCTGTTTGCTCCCCACGCTTTCGCACCTCAGCGTCAGTCTTCGTCCAGGGGGCCGCCTTCGCCACCGGTA
SILVA_123_SSURef_tax_silva.fasta.gz	Bacteria;Proteobacteria;Gammaproteobacteria;Enterobacteriales;Enterobacteriaceae
SILVA_123_SSURef_tax_silva_full_align_trunc.fasta.gz	Bacteria;Proteobacteria;Gammaproteobacteria;Enterobacteriales;Enterobacteriaceae
SILVA_128_SSURef_tax_silva.fasta.gz	Bacteria;Proteobacteria;Gammaproteobacteria;Enterobacteriales;Enterobacteriaceae
SILVA_128_SSURef_tax_silva_full_align_trunc.fasta.gz	Bacteria;Proteobacteria;Gammaproteobacteria;Enterobacteriales;Enterobacteriaceae
[truncated: 483 more rows]

## Sheet: mock22
1	TACGTAGGTCCCGAGCGTTGTCCGGATTTATTGGGCGTAAAGGGAGCGCAGGCGGTCAGGAAAGTCTGGA_CCTGTTCGCTACCCACGCTTTCGAGCCTCAGCGTCAGTGACAGACCAGAGAGCCGCCTTCGCCACTGGTG
[truncated: 207 more rows]

[truncated: 2 more sheets: mock23, Legend]
